# Supplementary material for: Role of the visual experience-dependent nascent proteome in neuronal plasticity
Source: eLife. 2018 Feb 7;7:e33420. doi: 10.7554/eLife.33420 (PMC5815848; doi:10.7554/eLife.33420)
Supplement: Figure 2—figure supplement 1—source data 1. [file elife-33420-fig2-figsupp1-data1.xlsx]

## Sheet: Summary
	ratio		ratio		ratio		newly-synthesized		ratio		ratio
eIF3A	1.25415	FUS	0.879549	RPS17	1.3459			FUS	1.77717	RPS17	4.76681
eIF3A	1.61649	FUS	0.903409	RPS17	1.04741			FUS	1.58782	RPS17	1.21016
eIF3A	1.17971	FUS	0.951384	RPS17	0.956655			FUS	4.67404	RPS17	1.18176
eIF3A	1.08199	FUS	1.05016	RPS17	0.705524			FUS	2.58059	RPS17	1.21501
eIF3A	1.59558	FUS	0.937622	RPS17	0.681346			control	1	control	1
eIF3A	1.2808	FUS	1.02205	control	1			control	1	control	1
eIF3A	1.1753	control	1	control	1			control	1	control	1
eIF3A	1.01992	control	1	control	1			control	1	control	1
eIF3A	1.14136	control	1	control	1
control	1	control	1	control	1
control	1	control	1
control	1	control	1
control	1
control	1
control	1
control	1
control	1
control	1
t Test					t Test					t Test
Total eIF3A-control					Total FUS-control					Total RPS17-control
Assuming unequal variances					Assuming unequal variances					Assuming unequal variances
Difference	0.260589	t Ratio	3.69979		Difference	-0.04264	t Ratio	-1.5679		Difference	-0.05263	t Ratio	-0.43106
Std Err Dif	0.070434	DF	8		Std Err Dif	0.02719	DF	5		Std Err Dif	0.1221	DF	4
Upper CL Dif	0.423009	Prob > |t|	0.006	**	Upper CL Dif	0.02727	Prob > |t|	0.1777		Upper CL Dif	0.28638	Prob > |t|	0.6886
Lower CL Dif	0.098169	Prob > t	0.003		Lower CL Dif	-0.11254	Prob > t	0.9112		Lower CL Dif	-0.39164	Prob > t	0.6557
Confidence	0.95	Prob < t	0.997		Confidence	0.95	Prob < t	0.0888		Confidence	0.95	Prob < t	0.3443
Power Details					Power Details					Power Details
Test	Column 1				Test	ratio 2				Test	Column 1
Power					Power					Power
α	σ	δ	Number	Power	α	σ	δ	Number	Power	α	σ	δ	Number	Power
0.05	0.149412	0.130295	18	0.9345	0.05	0.047103	0.021319	12	0.2947	0.05	0.193061	0.026317	10	0.0669
Least Significant Number					Least Significant Number					Least Significant Number
α	σ	δ	Number(LSN)		α	σ	δ	Number(LSN)		α	σ	δ	Number(LSN)
0.05	0.149412	0.130295	7.92306		0.05	0.047103	0.021319	21.3343		0.05	0.193061	0.026317	209.177
AHA-fus							AHA-RPS17
Wilcoxon / Kruskal-Wallis Tests (Rank Sums)							Wilcoxon / Kruskal-Wallis Tests (Rank Sums)
Level	Count	Score Sum	Expected Score	Score Mean	(Mean-Mean0)/Std0		Level	Count	Score Sum	Expected Score	Score Mean	(Mean-Mean0)/Std0
control	4	10	18	2.5	-2.307		control	4	10	18	2.5	-2.307
FUS	4	26	18	6.5	2.307		RPS17	4	26	18	6.5	2.307
2-Sample Test, Normal Approximation							2-Sample Test, Normal Approximation
S	Z	Prob>|Z|					S	Z	Prob>|Z|
26	2.30672	0.0211	*				26	2.30672	0.0211	*
1-Way Test, ChiSquare Approximation							1-Way Test, ChiSquare Approximation
ChiSquare	DF	Prob>ChiSq					ChiSquare	DF	Prob>ChiSq
6.0541	1	0.0139					6.0541	1	0.0139
Small sample sizes. Refer to statistical tables for tests, rather than large-sample approximations.							Small sample sizes. Refer to statistical tables for tests, rather than large-sample approximations.
Power Details							Power Details
Test	Column 1						Test	Newly synthesized protein 3
Power							Power
α	σ	δ	Number	Power			α	σ	δ	Number	Power
0.05	0.999292	0.827453	8	0.5022			0.05	1.26029	0.546717	8	0.1799
Least Significant Number							Least Significant Number
α	σ	δ	Number(LSN)				α	σ	δ	Number(LSN)
0.05	0.999292	0.827453	8.44601				0.05	1.26029	0.546717	22.9836
