# Supplementary material for: Role of the visual experience-dependent nascent proteome in neuronal plasticity
Source: eLife. 2018 Feb 7;7:e33420. doi: 10.7554/eLife.33420 (PMC5815848; doi:10.7554/eLife.33420)
Supplement: Figure 2—source data 1. [file elife-33420-fig2-data1.xlsx]

## Sheet: Fig2-B
total	Calmodulin	CaMKII	eIF3A	L1CAM	PSMD2	Rps17	FUS	BONCAT(normalized to BSA and tubulin)	Calmodulin	CaMKII	eIF3A	L1CAM	PSMD2	Rps17	FUS
1	0.990436	1.09367		0.792683				1	0.653313	1.23264		0.79972
2	0.750838	0.824069		0.913029				2	0.547037	2.28712		0.887125
3				0.936216				3	0.461454	3.88113		1.59655
4				0.499931				4	0.590468	8.40243		0.812586
5			1.36175			1.35031		5	0.906419	4.49486		3.66257	3.36159	76.9614
6	0.995423		0.99632	1.0888		0.914704		6	0.954921	1.06919
7	1.14596		1.16983	1.03023		1.98459		7	0.789383	3.08068
8			1.76452			0.655269		8		1.2404			1.89417
9			1.12576			1.52813		9		1.40269		1.91994	1.30787	1.90332
10			1.62383			2.56656		10		2.17329
11					0.73668	1.3264		11
12					0.927933			12					19.53	33.5788
13					0.981791			13					5.70489	5.6648
14								14							4.58229
15								15							1.05411
16							1.36228	16							2.04199
17		0.608231						17		1.12033
18			1.18862			1.08522		18
19					0.950526	0.894207		19	0.986166					1.03226	1.49896
20						1.05499	1.34925	20
21	0.634348	0.733014	1.24104		0.998749	0.564665	0.949062	21	0.906986	2.76393			1.80971	1.36089
22	1.204	0.80924	1.51404		0.981309	0.901504	1.01054	22
23	1.08964	0.873585	1.04389		0.945639	1.04996	1.10229	23
Total count	7	6	10	6	7	13	5	Total count	9	12		6	6	6	4
Total protein	Oneway Analysis of Calmodulin By Control						Oneway Analysis of CaMKII By Control						Oneway Analysis of Eif3a By Control						Oneway Analysis of L1CAM By Control						Oneway Analysis of PSMD2 By Control						Oneway Analysis of Rps17 By Control						Oneway Analysis of FUS By Control
																																											Oneway Analysis of PSMD2 By Control
	t Test						t Test						t Test						t Test						t Test						t Test						t Test
	X-C						X-C						X-C						X-C						X-C						X-C						X-C
	Assuming unequal variances						Assuming unequal variances						Assuming unequal variances						Assuming unequal variances						Assuming unequal variances						Assuming unequal variances						Assuming unequal variances						t Test
																																											X-C
																																											Assuming unequal variances
	Difference	-0.02705	t Ratio	-0.34267			Difference	-0.17637	t Ratio	-2.67682			Difference	0.302959	t Ratio	3.73804			Difference	-0.12319	t Ratio	-1.4306			Difference	-0.0682	t Ratio	-2.01597			Difference	0.22127	t Ratio	1.44765			Difference	0.15468	t Ratio	1.80577
	Std Err Dif	0.07894	DF	6			Std Err Dif	0.06589	DF	5			Std Err Dif	0.081047	DF	9			Std Err Dif	0.08611	DF	5			Std Err Dif	0.03383	DF	6			Std Err Dif	0.15285	DF	12			Std Err Dif	0.08566	DF	4
	Upper CL Dif	0.16611	Prob > |t|	0.7435			Upper CL Dif	-0.007	Prob > |t|	0.044			Upper CL Dif	0.486301	Prob > |t|	0.0046			Upper CL Dif	0.09816	Prob > |t|	0.2119			Upper CL Dif	0.01458	Prob > |t|	0.0904			Upper CL Dif	0.5543	Prob > |t|	0.1733			Upper CL Dif	0.39251	Prob > |t|	0.1453			Difference	-0.0682	t Ratio	-2.01597
	Lower CL Dif	-0.22021	Prob > t	0.6282			Lower CL Dif	-0.34573	Prob > t	0.978			Lower CL Dif	0.119617	Prob > t	0.0023			Lower CL Dif	-0.34453	Prob > t	0.894			Lower CL Dif	-0.15097	Prob > t	0.9548			Lower CL Dif	-0.11176	Prob > t	0.0867			Lower CL Dif	-0.08315	Prob > t	0.0726			Std Err Dif	0.03383	DF	6
	Confidence	0.95	Prob < t	0.3718			Confidence	0.95	Prob < t	0.022			Confidence	0.95	Prob < t	0.9977			Confidence	0.95	Prob < t	0.106			Confidence	0.95	Prob < t	0.0452			Confidence	0.95	Prob < t	0.9133			Confidence	0.95	Prob < t	0.9274			Upper CL Dif	0.01458	Prob > |t|	0.0904
																																											Lower CL Dif	-0.15097	Prob > t	0.9548
																																											Confidence	0.95	Prob < t	0.0452
	Power Details						Power Details						Power Details						Power Details						Power Details						Power Details						Power Details
	Test	Control					Test	Control					Test	Control					Test	Control					Test	Control					Test	Control					Test	Control
	Power						Power						Power						Power						Power						Power						Power						Power Details
																																											Test	Control
	α	σ	δ	Number	Power		α	σ	δ	Number	Power		α	σ	δ	Number	Power		α	σ	δ	Number	Power		α	σ	δ	Number	Power		α	σ	δ	Number	Power		α	σ	δ	Number	Power
	0.05	0.147685	0.013525	14	0.0615		0.05	0.114118	0.088183	12	0.6753		0.05	0.181227	0.151479	20	0.942		0.05	0.149142	0.061593	12	0.2537		0.05	0.063286	0.034098	14	0.458		0.05	0.389686	0.110635	26	0.2847		0.05	0.135441	0.077341	10	0.3563
																																											Power
																																											α	σ	δ	Number	Power
																																											0.05	0.063286	0.034098	14	0.458
	Least Significant Number						Least Significant Number						Least Significant Number						Least Significant Number						Least Significant Number						Least Significant Number						Least Significant Number
	α	σ	δ	Number(LSN)			α	σ	δ	Number(LSN)			α	σ	δ	Number(LSN)			α	σ	δ	Number(LSN)			α	σ	δ	Number(LSN)			α	σ	δ	Number(LSN)			α	σ	δ	Number(LSN)
	0.05	0.147685	0.013525	460.424			0.05	0.114118	0.088183	9.23959			0.05	0.181227	0.151479	8.34687			0.05	0.149142	0.061593	25.0815			0.05	0.063286	0.034098	15.8734			0.05	0.389686	0.110635	50.1467			0.05	0.135441	0.077341	14.4439
																																											Least Significant Number
Newly synthesized protein	Oneway Analysis of Calmodulin By Control						Oneway Analysis of CaMKII By Control						Oneway Analysis of L1CAM By Control						Oneway Analysis of PSMD2 By Control						Oneway Analysis of RPS17 By Control						Oneway Analysis of FUS By Control												α	σ	δ	Number(LSN)
																																											0.05	0.063286	0.034098	15.8734
	Wilcoxon / Kruskal-Wallis Tests (Rank Sums)						Wilcoxon / Kruskal-Wallis Tests (Rank Sums)						Wilcoxon / Kruskal-Wallis Tests (Rank Sums)						Wilcoxon / Kruskal-Wallis Tests (Rank Sums)						Wilcoxon / Kruskal-Wallis Tests (Rank Sums)						Wilcoxon / Kruskal-Wallis Tests (Rank Sums)												Missing Rows	26
	Level	Count	Score Sum	Expected Score	Score Mean	(Mean-Mean0)/Std0	Level	Count	Score Sum	Expected Score	Score Mean	(Mean-Mean0)/Std0	Level	Count	Score Sum	Expected Score	Score Mean	(Mean-Mean0)/Std0	Level	Count	Score Sum	Expected Score	Score Mean	(Mean-Mean0)/Std0	Level	Count	Score Sum	Expected Score	Score Mean	(Mean-Mean0)/Std0	Level	Count	Score Sum	Expected Score	Score Mean	(Mean-Mean0)/Std0
	C	9	126	85.5	14	3.773	C	12	78	150	6.5	-4.411	C	6	39	39	6.5	0	C	6	21	39	3.5	-2.991	C	6	21	39	3.5	-2.991	C	4	10	18	2.5	-2.307
	X	9	45	85.5	5	-3.773	X	12	222	150	18.5	4.411	X	6	39	39	6.5	0	X	6	57	39	9.5	2.991	X	6	57	39	9.5	2.991	X	4	26	18	6.5	2.307
	2-Sample Test, Normal Approximation						2-Sample Test, Normal Approximation						2-Sample Test, Normal Approximation						2-Sample Test, Normal Approximation						2-Sample Test, Normal Approximation						2-Sample Test, Normal Approximation
	S	Z	Prob>|Z|				S	Z	Prob>|Z|				S	Z	Prob>|Z|				S	Z	Prob>|Z|				S	Z	Prob>|Z|				S	Z	Prob>|Z|
	45	-3.77346	0.0002				222	4.41143	<.0001				39	0	1				57	2.99124	0.0028				57	2.99124	0.0028				26	2.30672	0.0211
	1-Way Test, ChiSquare Approximation						1-Way Test, ChiSquare Approximation						1-Way Test, ChiSquare Approximation						1-Way Test, ChiSquare Approximation						1-Way Test, ChiSquare Approximation						1-Way Test, ChiSquare Approximation
	ChiSquare	DF	Prob>ChiSq				ChiSquare	DF	Prob>ChiSq				ChiSquare	DF	Prob>ChiSq				ChiSquare	DF	Prob>ChiSq				ChiSquare	DF	Prob>ChiSq				ChiSquare	DF	Prob>ChiSq
	14.5972	1	0.0001				19.7339	1	<.0001				0	1	1				9.4661	1	0.0021				9.4661	1	0.0021				6.0541	1	0.0139
	Power Details						Power Details						Power Details						Power Details						Power Details						Power Details
	Test	Control					Test	Control					Test	Control					Test	Control					Test	Control					Test	Control
	Power						Power						Power						Power						Power						Power
	α	σ	δ	Number	Power		α	σ	δ	Number	Power		α	σ	δ	Number	Power		α	σ	δ	Number	Power		α	σ	δ	Number	Power		α	σ	δ	Number	Power
	0.05	0.138619	0.122436	18	0.94		0.05	1.48945	0.881195	24	0.791		0.05	0.782574	0.306541	12	0.2331		0.05	4.95569	2.30069	12	0.3073		0.05	21.6007	9.54883	12	0.2835		0.05	1.11573	0.647169	8	0.283
	Least Significant Number						Least Significant Number						Least Significant Number						Least Significant Number						Least Significant Number						Least Significant Number
	α	σ	δ	Number(LSN)			α	σ	δ	Number(LSN)			α	σ	δ	Number(LSN)			α	σ	δ	Number(LSN)			α	σ	δ	Number(LSN)			α	σ	δ	Number(LSN)
	0.05	0.138619	0.122436	7.80267			0.05	1.48945	0.881195	13.6528			0.05	0.782574	0.306541	27.5812			0.05	4.95569	2.30069	20.4134			0.05	21.6007	9.54883	22.2335			0.05	1.11573	0.647169	14.0874
