# Supplementary material for: Role of the visual experience-dependent nascent proteome in neuronal plasticity
Source: eLife. 2018 Feb 7;7:e33420. doi: 10.7554/eLife.33420 (PMC5815848; doi:10.7554/eLife.33420)
Supplement: Figure 3—source data 1. [file elife-33420-fig3-data1.xlsx]

## Sheet: Fig3B
RNA splicing			Chromatin remodeling			Translation			2
SFPQ	1.54408		SFPQ	1.54408		rps17	1.71288		1.75
FUS	1.36057		PBRM1	1.35996		naca	1.37931		1.5
NSRP1	1.35996		CBX3	1.35514		eif4a1	1.18466		1.25
IWS1	1.25237		SMARCD1	0.84		eif3a	1.15507		1
SKIV2L2	1.24855		SMARCD2	0.84					0.75
NONO	1.15314		SMARCD3	0.84					0.5
SMC1A	0.79602		ACTB	0.782702
HNRNPC	0.760795		HNRNPC	0.760795
SNW1	0.75244		CTNNB1	0.631721
PCBP2	0.59657		HIST1H4A	0.611428
