# Supplementary material for: Role of the visual experience-dependent nascent proteome in neuronal plasticity
Source: eLife. 2018 Feb 7;7:e33420. doi: 10.7554/eLife.33420 (PMC5815848; doi:10.7554/eLife.33420)
Supplement: Figure 4—figure supplement 1—source data 1. [file elife-33420-fig4-figsupp1-data1.xlsx]

## Sheet: Summary of SupFig2
	T1	Dark	VE							two-tailed paired Student’s t test		control
Control	48.8365	41.4773	42.3282									VE	33.2431	t-Ratio	3.70701
Control	221.192	-7.648	26.375									Dark	4.10475	DF	7
Control	236.856	21.496	35.286									Mean Difference	29.1384	Prob > |t|	0.0076
Control	94.5635	37.0325	47.95									Std Error	7.86034	Prob > t	0.0038
Control	200.519	-12.644	23.061									Upper 95%	47.7251	Prob < t	0.9962
Control	122.923	-49.1397	13.7324									Lower 95%	10.5516
Control	206.505	-17.673	39.144									N	8
Control	69.0969	19.9369	38.0682									Correlation	0.85367
average	150.061	4.10475	33.2431
	T1	Dark	VE									eIF3A
eIF3A-OE	138.412	-2.847	14.424									VE	40.1559	t-Ratio	4.46504
eIF3A-OE	54.65	6.7078	72.6652									Dark	3.38713	DF	5
eIF3A-OE	257.118	-41.812	15.39									Mean Difference	36.7687	Prob > |t|	0.0066
eIF3A-OE	122.692	26.572	60.676									Std Error	8.2348	Prob > t	0.0033
eIF3A-OE	130.786	15.822	39.404									Upper 95%	57.937	Prob < t	0.9967
eIF3A-OE	224.709	15.88	38.376									Lower 95%	15.6005
average	154.728	3.38713	40.1559									N	6
	T1	Dark	VE									Correlation	0.64332
FUS-OE	88.5396	-26.1692	45.9436
FUS-OE	142.586	-7.719	39.046									FUS
FUS-OE	79.706	1.5924	24.5116									VE	36.2759	t-Ratio	3.11747
FUS-OE	139.953	-9.217	18.883									Dark	3.82269	DF	10
FUS-OE	138.528	-13.017	104.455									Mean Difference	32.4532	Prob > |t|	0.0109
FUS-OE	62.2787	-2.8843	5.9911									Std Error	10.4101	Prob > t	0.0055
FUS-OE	97.9739	30.8631	39.173									Upper 95%	55.6484	Prob < t	0.9945
FUS-OE	128.87	41.363	58.272									Lower 95%	9.25806
FUS-OE	63.3239	6.7625	13.3747									N	11
FUS-OE	193.355	24.976	32.052									Correlation	-0.0194
FUS-OE	101.244	-4.5009	17.3329
average	112.396	3.82269	36.2759
	T1	Dark	VE
RPS17-OE	106.611	-8.2108	65.0588									RPS17
RPS17-OE	91.4921	11.9189	44.065									VE	37.4761	t-Ratio	0.721054
RPS17-OE	159.993	-65.9263	94.5383									Dark	26.1038	DF	16
RPS17-OE	73.1436	80.9664	-26.807									Mean Difference	11.3723	Prob > |t|	0.4813
RPS17-OE	111.501	11.84	26.017									Std Error	15.7717	Prob > t	0.2406
RPS17-OE	133.682	43.5	51.135									Upper 95%	44.8068	Prob < t	0.7594
RPS17-OE	93.1761	10.1209	51.378									Lower 95%	-22.062
RPS17-OE	153.308	7.558	-4.101									N	17
RPS17-OE	103.82	28.599	57.242									Correlation	-0.615
RPS17-OE	134.902	142.688	4.576
RPS17-OE	58.1206	7.3362	16.085
RPS17-OE	73.868	27.55	55.037
RPS17-OE	104.449	11.721	57.325
RPS17-OE	94.5152	25.1798	45.384
RPS17-OE	139.866	8.788	27.534
RPS17-OE	98.1167	61.5063	42.772
RPS17-OE	76.9418	38.6292	29.854
average	106.324	26.1038	37.4761
