# Supplementary material for: Role of the visual experience-dependent nascent proteome in neuronal plasticity
Source: eLife. 2018 Feb 7;7:e33420. doi: 10.7554/eLife.33420 (PMC5815848; doi:10.7554/eLife.33420)
Supplement: Figure 4—source data 1. — Raw values of normalized mRNA expression of fus-a in tecta electroporated with control or FUS MO presented in Figure 4E. Raw values of normalized protein expression of FUS in tecta electroporated with control or FUS expression construct presented in Figure 4F. Raw values of normalized mRNA expression of gria1 and gria2 in tecta electroporated with control or FUS MO presented in Figure 4G. [file elife-33420-fig4-data1.xlsx]

## Sheet: Fig4C-C'' 
total length	Dark	VE						two-tailed paired Student’s t test
CMO	-3.772	36.925								CMO
CMO	6.845	92.507
CMO	-3.347	122.336								Difference: VE-Dark
CMO	-34.361	108.093
CMO	-3.069	57.262
CMO	-22.716	13.294
CMO	25.02	69.408								VE	75.94	t-Ratio	7.06372
CMO	-1.107	73.514								Dark	10.5195	DF	13
CMO	-18.582	24.423								Mean Difference	65.4205	Prob > |t|	<.0001
CMO	76.652	114.882								Std Error	9.26147	Prob > t	<.0001
CMO	81.259	113.928								Upper 95%	85.4287	Prob < t	1
CMO	-50.911	38.919								Lower 95%	45.4123
CMO	62.116	101.247								N	14
CMO	33.246	96.422								Correlation	0.59846
Average	10.5195	75.94
										FMO
	Dark	VE
FMO	34.989	63.947								Difference: VE-Dark
FMO	-4.552	48.302
FMO	150.664	6.978
FMO	73.978	152.986
FMO	-46.352	111.904								VE	49.3738	t-Ratio	0.323375
FMO	52.204	-35.619								Dark	38.4763	DF	8
FMO	-7.465	32.661								Mean Difference	10.8974	Prob > |t|	0.7547
FMO	-9.399	69.354								Std Error	33.699	Prob > t	0.3774
FMO	102.22	-6.149								Upper 95%	88.6076	Prob < t	0.6226
Average	38.4763	49.3738								Lower 95%	-66.813
										N	9
										Correlation	-0.382
	Dark	VE
NMO	42.959	50.262
NMO	-5.957	-4.675								NMO
NMO	-60.381	40.229
NMO	-4.725	109.088								Difference: VE-Dark
NMO	7.956	54.781
NMO	34.739	52.038
NMO	-73.204	82.179
NMO	63.438	163.263								VE	51.8218	t-Ratio	2.91336
NMO	2.296	-7.897								Dark	-2.09	DF	9
NMO	-28.021	-21.05								Mean Difference	53.9118	Prob > |t|	0.0172
Average	-2.09	51.8218								Std Error	18.505	Prob > t	0.0086
										Upper 95%	95.773	Prob < t	0.9914
										Lower 95%	12.0506
										N	10
										Correlation	0.33845

## Sheet: Fig4D-D'' 
	Dark	VE	T1							two-tailed paired Student’s t test		CMO
CMO	41.733	63.798	179.55
CMO	15.128	50.09	132.322									Difference: VE-Dark
CMO	21.115	48.202	136.939									VE	50.7947	t-Ratio	4.02791
CMO	28.306	75.391	134.656									Dark	25.724	DF	8
CMO	0.797	13.134	114.687									Mean Difference	25.0707	Prob > |t|	0.0038
CMO	37.813	85.884	166.055									Std Error	6.22423	Prob > t	0.0019
CMO	31.839	57.914	170.242									Upper 95%	39.4238	Prob < t	0.9981
CMO	18.621	40.087	166.246									Lower 95%	10.7176
CMO	36.164	22.652	191.245									N	9
Average	25.724	50.7947	154.66									Correlation	0.60558
	Dark	VE	T1									FMO
FMO	-42.712	17.765	166.435
FMO	-11.888	121.983	165.4									Difference: VE-Dark
FMO	28.456	3.472	194.863									VE	31.9632	t-Ratio	1.13654
FMO	-2.0827	8.452	91.0001									Dark	8.23981	DF	10
FMO	100.885	-6.264	120.485									Mean Difference	23.7234	Prob > |t|	0.2822
FMO	12.844	0.836	129.193									Std Error	20.8733	Prob > t	0.1411
FMO	43.12	-11.526	189.289									Upper 95%	70.232	Prob < t	0.8589
FMO	10.504	51.057	104.206									Lower 95%	-22.785
FMO	-27.309	43.187	106.112									N	11
FMO	-12.1214	48.9105	92.5269									Correlation	-0.5059
FMO	-9.058	73.723	284.25
Average	8.23981	31.9632	149.433
	Dark	VE	T1									FMO+FUS
FMO+FUS	14.925	56.537	101.69
FMO+FUS	-24.2362	36.9522	118.423									Difference: VE-Dark
FMO+FUS	-10.419	29.621	111.518									VE	52.8486	t-Ratio	4.00181
FMO+FUS	5.7363	33.4564	85.7843									Dark	6.49092	DF	9
FMO+FUS	-7.2419	61.7057	83.1622									Mean Difference	46.3577	Prob > |t|	0.0031
FMO+FUS	11.587	24.012	164.951									Std Error	11.5842	Prob > t	0.0016
FMO+FUS	2.552	50.702	219.313									Upper 95%	72.5629	Prob < t	0.9984
FMO+FUS	10.049	27.001	179.76									Lower 95%	20.1525
FMO+FUS	46.571	180.954	218.213									N	10
FMO+FUS	15.386	27.545	100.323									Correlation	0.6855
Average	6.49092	52.8486	138.314

## Sheet: Fig4E
normalized	CMO1	FMO1	CMO2	FMO2	CMO_3	FMO_3	CMO_4	FMO_4		Oneway Analysis of Fus_a By Column 1
Fus_a	2.48898	1.76289	1.73767	1.46021	1.03584	0.986383	1.28953	0.778866
Ratio of Fus_a		0.708278		0.840329		0.952259		0.603991
										t Test
	Fus_a									FMO-CMO
FMO	0.708278									Assuming unequal variances
FMO	0.840329
FMO	0.952259
FMO	0.603991									Difference	-0.22379	t Ratio	-2.94314
CMO	1									Std Err Dif	0.07604	DF	3
CMO	1									Upper CL Dif	0.0182	Prob > |t|	0.0604
CMO	1									Lower CL Dif	-0.46577	Prob > t	0.9698
CMO	1									Confidence	0.95	Prob < t	0.0302
t-test	*
p=	0.0302
Average	Fus_a
CMO	1									Power Details
FMO	0.77621									Test	Column 1
SEM	Fus_a
CMO										Power
FMO	0.07604
										α	σ	δ	Number	Power
										0.05	0.107532	0.111893	8	0.6906
										Least Significant Number
										α	σ	δ	Number(LSN)
										0.05	0.107532	0.111893	6.5148

## Sheet: Fig4F
		FUS
62016	control1	1					Oneway Analysis of FUS By Column 1
62016	control2	1
60916	control	1
80216	control1	1
80216	control2	1					t Test
62016	FUS_OE1	1.45711					FUS_OE-control
62016	FUS_OE2	1.37427					Assuming unequal variances
60916	FUS_OE	0.927579
80216	FUS_OE1	1.61369
80216	FUS_OE2	1.60086					Difference	0.394702	t Ratio	3.15522
							Std Err Dif	0.125095	DF	4
							Upper CL Dif	0.742021	Prob > |t|	0.0343
							Lower CL Dif	0.047383	Prob > t	0.0172
							Confidence	0.95	Prob < t	0.9828
	Average	FUS
	Control	1
	FUS-OE	1.3947
	SEM						Power Details
	Control						Test	Column 1
	FUS-OE	0.125095
		*
							Power
							α	σ	δ	Number	Power
							0.05	0.197793	0.197351	10	0.7888
							Least Significant Number
							α	σ	δ	Number(LSN)
							0.05	0.197793	0.197351	6.80349

## Sheet: Fig4G
	gria1/rps13_3	gria2/rps13_3						gria1/rps13_3							gria1/rps13_3	Assuming unequal variances					Power Details
CMO	1	1						Means and Std Deviations													Test	Column 1
FMO	0.901129	1.1647																			Power
CMO	1	1						Level	Number	Mean	Std Dev	Std Err Mean	Lower 95%	Upper 95%		Difference	-0.32262	t Ratio	-2.7112
FMO	0.613792	0.527077						CMO	4	1	0	0	1	1		Std Err Dif	0.11899	DF	3		α	σ	δ	Number	Power
CMO	1	1						FMO	4	0.67738	0.237987	0.11899	0.2987	1.0561		Upper CL Dif	0.05607	Prob > |t|	0.0731		0.05	0.168282	0.161308	8	0.621
FMO	0.824225	1.03202														Lower CL Dif	-0.70131	Prob > t	0.9635
CMO	1	1														Confidence	0.95	Prob < t	0.0365		Least Significant Number
FMO	0.37039	0.422105
																					α	σ	δ	Number(LSN)
																					0.05	0.168282	0.161308	7.10409
	Average	gria1	gria2
	CMO	1	1					gria2/rps13_3							gria2/rps13_3	Assuming unequal variances					Power Details
	FMO	0.67738	0.78647					Means and Std Deviations													Test	Column 1
																					Power
	SEM	gria1	gria2					Level	Number	Mean	Std Dev	Std Err Mean	Lower 95%	Upper 95%		Difference	-0.21353	t Ratio	-1.16459
	CMO							CMO	4	1	0	0	1	1		Std Err Dif	0.18335	DF	3		α	σ	δ	Number	Power
	FMO	0.11899	0.18335					FMO	4	0.78647	0.366696	0.18335	0.203	1.37		Upper CL Dif	0.36997	Prob > |t|	0.3284		0.05	0.259293	0.106763	8	0.1668
		0.91536														Lower CL Dif	-0.79702	Prob > t	0.8358
	one tailed t test															Confidence	0.95	Prob < t	0.1642		Least Significant Number
	p=	0.0365	0.1642
																					α	σ	δ	Number(LSN)
																					0.05	0.259293	0.106763	25.2158
