# Supplementary material for: Role of the visual experience-dependent nascent proteome in neuronal plasticity
Source: eLife. 2018 Feb 7;7:e33420. doi: 10.7554/eLife.33420 (PMC5815848; doi:10.7554/eLife.33420)
Supplement: Figure 5—source data 1. — Raw values of normalized protein expression of eif3A or RPS17 in tecta electroporated with control/eif3A MO, control/eIF3A expression construct, or control/RPS17 MO presented in Figure 5E–G. Raw values of normalized protein expression of RPS17 in HEK cells transfected with control or RPS17 expression construct presented in Figure 5H. [file elife-33420-fig5-data1.xlsx]

## Sheet: Fig5B-B"
	Dark	VE						two-tailed paired Student’s t test		CMO
CMO	5.333	79.233
CMO	12.523	65.689								Difference: VE-Dark
CMO	64.563	134.31
CMO	49.644	125.946
CMO	0.685	27.404
CMO	23.11	128.695								VE	83.8481	t-Ratio	6.58989
CMO	-6.024	54.468								Dark	22.2911	DF	7
CMO	28.495	55.04								Mean Difference	61.557	Prob > |t|	0.0003
Average	22.2911	83.8481								Std Error	9.34113	Prob > t	0.0002
										Upper 95%	83.6453	Prob < t	0.9998
										Lower 95%	39.4687
										N	8
										Correlation	0.77972
	Dark	VE
EMO	-18.186	173.926
EMO	2.0256	56.6867								EMO
EMO	46.98	35.667
EMO	29.641	-23.679								Difference: VE-Dark
EMO	-0.27	117.985
EMO	-3.0654	117.019
EMO	84.882	144.52
EMO	35.345	93.353								VE	55.9351	t-Ratio	1.10869
EMO	6.081	67.218								Dark	31.0011	DF	16
EMO	-6.486	-19.649								Mean Difference	24.934	Prob > |t|	0.284
EMO	21.891	74.375								Std Error	22.4896	Prob > t	0.142
EMO	25.785	54.367								Upper 95%	72.6097	Prob < t	0.858
EMO	28.657	115.863								Lower 95%	-22.742
EMO	8.474	-8.368								N	17
EMO	181.232	-34.306								Correlation	-0.2852
EMO	-12.512	-20.896
EMO	96.544	6.815
Average	31.0011	55.9351								RMO
										Difference: VE-Dark
	Dark	VE
RMO	78.067	-30.545
RMO	-98.36	28.799
RMO	30.46	84.201								VE	56.9007	t-Ratio	1.26381
RMO	-6.76	56.493								Dark	28.1602	DF	9
RMO	100.166	206.264								Mean Difference	28.7406	Prob > |t|	0.2381
RMO	10.78	31.83								Std Error	22.7412	Prob > t	0.119
RMO	68.282	111.463								Upper 95%	80.1848	Prob < t	0.881
RMO	63.045	46.031								Lower 95%	-22.704
RMO	52.362	-3.567								N	10
RMO	-16.4404	38.0383								Correlation	0.3361
Average	28.1602	56.9007

## Sheet: Fig5C-C"
	Dark	VE	T1					two-tailed paired Student’s t test		CMO
CMO	73.66	138.041	155.952
CMO	32.448	216.269	114.29							Difference: VE-Dark
CMO	11.668	129.007	275.873
CMO	42.345	77.461	141.404
CMO	51.487	-17.643	238.655
CMO	6.727	42.675	187.524							VE	76.3111	t-Ratio	2.36877
CMO	14.107	6.302	115.504							Dark	25.3007	DF	9
CMO	6.354	40.382	139.232							Mean Difference	51.0104	Prob > |t|	0.042
CMO	-8.633	68.999	160.487							Std Error	21.5345	Prob > t	0.021
CMO	22.8441	61.618	78.2159							Upper 95%	99.7249	Prob < t	0.979
Average	25.3007	76.3111	160.714							Lower 95%	2.2959
	Dark	VE	T1							N	10
EMO	3.741	35.075	156.356							Correlation	0.20832
EMO	5.341	99.658	169.966
EMO	-22.389	31.076	126.979							EMO
EMO	91.578	146.17	203.762
EMO	-41.828	52.342	222.343							Difference: VE-Dark
EMO	11.034	64.955	123.525
EMO	19.78	55.009	135.374
EMO	-46.4303	2.9063	129.513
EMO	2.378	-0.475	189.98	μ						VE	42.8154	t-Ratio	1.48645
EMO	63.1424	-10.523	94.3956							Dark	19.2867	DF	13
EMO	144.297	22.396	146.123							Mean Difference	23.5287	Prob > |t|	0.161
EMO	19.015	33.622	179.301							Std Error	15.8288	Prob > t	0.0805
EMO	-0.647	39.78	157.912							Upper 95%	57.7246	Prob < t	0.9195
EMO	21.002	27.424	193.455							Lower 95%	-10.667
Average	19.2867	42.8154	159.213							N	14
	Dark	VE	T1							Correlation	0.18496
EMO + eIF3A	15.215	46.387	166.274
EMO + eIF3A	-4.4681	25.0451	88.254							EMO+eIF3A
EMO + eIF3A	-28.4879	58.788	99.5839
EMO + eIF3A	-1.302	73.98	110.438							Difference: VE-Dark
EMO + eIF3A	-14.511	31.682	134.821
EMO + eIF3A	-3.541	118.958	124.455
EMO + eIF3A	32.833	80.472	301.563
Average	-0.608857	62.1874	146.484							VE	62.1874	t-Ratio	4.88769
										Dark	-0.6089	DF	6
										Mean Difference	62.7963	Prob > |t|	0.0027
										Std Error	12.8479	Prob > t	0.0014
										Upper 95%	94.2339	Prob < t	0.9986
										Lower 95%	31.3587
										N	7
										Correlation	0.2206

## Sheet: Fig5D-D"
	Dark	VE	T1					two-tailed paired Student’s t test		CMO
CMO	-19.511	63.666	162.283
CMO	0.942	44.717	169.537							Difference: VE-Dark
CMO	2.852	16.591	156.134
CMO	26.159	-7.261	251.259
CMO	13.35	34.271	126.118
CMO	32.994	74.982	130.097							VE	49.3815	t-Ratio	3.29421
CMO	38.919	149.664	269.306							Dark	8.2805	DF	9
CMO	16.986	39.564	152.125							Mean Difference	41.101	Prob > |t|	0.0093
CMO	-8.177	47.705	284.838							Std Error	12.4768	Prob > t	0.0047
CMO	-21.709	29.916	147.503							Upper 95%	69.3254	Prob < t	0.9953
Average	8.2805	49.3815	184.92							Lower 95%	12.8766
										N	10
										Correlation	0.37063
	Dark	VE	T1							RMO
RMO	-2.235	56.686	146.164
RMO	13.365	93.742	108.872							Difference: VE-Dark
RMO	-0.6252	28.3832	100.004
RMO	53.518	21.324	142.166
RMO	-21.584	-19.396	169.158
RMO	-44.333	-0.504	214.589							VE	22.2649	t-Ratio	1.15596
RMO	16.589	3.632	149.914							Dark	8.09671	DF	9
RMO	-0.8218	16.7336	59.6947							Mean Difference	14.1682	Prob > |t|	0.2775
RMO	15.643	5.3908	55.7955							Std Error	12.2567	Prob > t	0.1387
RMO	51.4511	16.657	82.2579							Upper 95%	41.8946	Prob < t	0.8613
Average	8.09671	22.2649	122.862							Lower 95%	-13.558
										N	10
										Correlation	0.21781
										RMO+RPS17
	Dark	VE	T1							Difference: VE-Dark
RMO+RPS17	-6.5444	28.0934	101.897
RMO+RPS18	0.959	6.062	351.678
RMO+RPS19	-81.426	181.391	363.545
RMO+RPS20	5.339	44.8367	56.3953							VE	52.8413	t-Ratio	2.37234
RMO+RPS21	11.4896	25.2435	63.6839							Dark	-9.0562	DF	8
RMO+RPS22	4.1077	33.382	61.2942							Mean Difference	61.8975	Prob > |t|	0.0451
RMO+RPS23	13.6406	87.6537	69.7257							Std Error	26.0913	Prob > t	0.0225
RMO+RPS24	-11.7001	49.8043	86.9038							Upper 95%	122.064	Prob < t	0.9775
RMO+RPS25	-17.371	19.105	129.12							Lower 95%	1.73085
Average	-9.05618	52.8413	142.694							N	9
										Correlation	-0.7806

## Sheet: Fig5E-F
		eIF3A								EMO					Power Details
	CMO	1													Test	Column 1
	CMO	1								Oneway Analysis of eIF3A By Column 1
	CMO	1
	CMO	1													Power
	CMO	1
113015	EMO	0.369375								t Test					α	σ	δ	Number	Power
122115	EMO	0.487073								EMO-CMO					0.05	0.083429	0.251817	10	1
12216	EMO	0.407993								Assuming unequal variances
51216	EMO	0.66537
91616	EMO	0.552023
	one tail	**								Difference	-0.50363	t Ratio	-9.54484
	two taol	**								Std Err Dif	0.05276	DF	4		Least Significant Number
	Average	eIF3A								Upper CL Dif	-0.35713	Prob > |t|	0.0007
	CMO	1								Lower CL Dif	-0.65013	Prob > t	0.9997		α	σ	δ	Number(LSN)
	EMO	0.496367								Confidence	0.95	Prob < t	0.0003		0.05	0.083429	0.251817	3.56142
	SEM
	CMO
	EMO	0.052765
		eIF3A								eIF3A					Power Details
	control	1													Test	Column 1
	control	1								Oneway Analysis of eIF3A By Column 1
	control	1
51216	eIF3A-OE	1.89658													Power
60916	eIF3A-OE	2.20725
62016	eIF3A-OE	1.5727								t Test					α	σ	δ	Number	Power
	one tail	*								eIF3A-OE-control					0.05	0.224364	0.446088	6	0.9458
	two taol	*								Assuming unequal variances
										Difference	0.89218	t Ratio	4.87016
										Std Err Dif	0.18319	DF	2		Least Significant Number
	Average	eIF3A								Upper CL Dif	1.68039	Prob > |t|	0.0397
	control	1								Lower CL Dif	0.10396	Prob > t	0.0198		α	σ	δ	Number(LSN)
	eIF3A-OE	1.89218								Confidence	0.95	Prob < t	0.9802		0.05	0.224364	0.446088	4.13925
	SEM
	control
	eIF3A-OE	0.183192
RMO		Rps17								RMO					Power Details
113015	CMO	1													Test	Column 1
122115	CMO	1								Oneway Analysis of Rps17 By Column 1
13016	CMO	1
20416	CMO	1													Power
113015	RMO	0.736668
122115	RMO	0.304352								t Test					α	σ	δ	Number	Power
13016	RMO	0.881188								RMO-CMO					0.05	0.222252	0.228834	8	0.6816
20416	RMO	0.247119								Assuming unequal variances
	Average	Rps17
	CMO	1								Difference	-0.45767	t Ratio	-2.91219
	RMO	0.542332								Std Err Dif	0.15716	DF	3		Least Significant Number
										Upper CL Dif	0.04247	Prob > |t|	0.0619
	SEM									Lower CL Dif	-0.95781	Prob > t	0.9691		α	σ	δ	Number(LSN)
	CMO									Confidence	0.95	Prob < t	0.0309		0.05	0.222252	0.228834	6.58508
	RMO	0.157156
	one tail	*
	two taol

## Sheet: Fig5H
	GFP+RPS17+ devided GFP-RPS17+					Oneway Analysis of Intensity/pixel By group name
Blinded file name	group name	Intensity/pixel
1007	Control1	1.40858
1008	Control2	1.27427
1009	Control3	1.34178				t Test
1010	Control4	1.22643				Rps17_OE1-Control1
1002	Control5	2.33611				Assuming unequal variances
1003	Control6	1.59668
1004	Control7	1.98392
1011	Rps17_OE1	3.2979				Difference	0.83523	t Ratio	3.37477
1012	Rps17_OE2	2.15278				Std Err Dif	0.24749	DF	11.5692
1013	Rps17_OE3	2.15645				Upper CL Dif	1.37671	Prob > |t|	0.0058
1014	Rps17_OE4	2.61835				Lower CL Dif	0.29376	Prob > t	0.0029
1015	Rps17_OE5	2.08359				Confidence	0.95	Prob < t	0.9971
1005	Rps17_OE6	1.87194
1006	Rps17_OE7	2.83338
						Power Details
						Test	group name
						Power
						α	σ	δ	Number	Power
						0.05	0.463018	0.417617	14	0.8718
						Least Significant Number
						α	σ	δ	Number(LSN)
						0.05	0.463018	0.417617	7.61219
Level	Number	Mean	Std Dev	Std Err Mean
Control	7	1.59539	0.41595	0.15721
Rps17_OE	7	2.43063	0.505725	0.19115
