# Supplementary material for: Role of the visual experience-dependent nascent proteome in neuronal plasticity
Source: eLife. 2018 Feb 7;7:e33420. doi: 10.7554/eLife.33420 (PMC5815848; doi:10.7554/eLife.33420)
Supplement: Figure 6—figure supplement 1—source data 1. [file elife-33420-fig6-figsupp1-data1.xlsx]

## Sheet: Fig 6 Supplement 1 panel C
	neuronal cell body layer	neuropil		neuronal cell body layer																		Power Details
CMO	1.04301	1.08802		Means and Std Deviations																		Test
CMO	1.11714	1.06939										Nonparametric Comparisons For All Pairs Using Steel-Dwass Method
CMO	0.839854	0.842594																				Power
CMO	1.06596	0.71345		Level	Number	Mean	Std Dev	Std Err Mean	Lower 95%	Upper 95%
CMO	0.885317	1.05221		CMO	14	1	0.132787	0.03549	0.9233	1.0767		Level	- Level	Score Mean Difference	Std Err Dif	Z	p-Value	Hodges-Lehmann	Lower CL	Upper CL		α	σ	δ	Number	Power
CMO	1.04873	1.23434		EMO	7	1.90624	0.397861	0.15038	1.5383	2.2742		EMO	CMO	10.3929	2.87228	3.61833	0.0017	0.786793	0.53604	1.35115		0.05	0.200952	0.286759	56	1
CMO	0.996804	0.983939		RMO	12	0.99514	0.245911	0.07099	0.8389	1.1514		ERMO	CMO	7.7538	3.40582	2.27662	0.1035	0.121412	-0.02557	0.26586
CMO	0.813398	0.776468		ERMO	19	1.13185	0.203104	0.0466	1.034	1.2297		RMO	CMO	-2.244	3.00892	-0.7458	0.8785	-0.040155	-0.2317	0.19505		Least Significant Number
CMO	0.959773	1.02935										RMO	ERMO	-6.7303	3.35258	-2.00749	0.1851	-0.182277	-0.33121	0.04261
CMO	1.2927	1.09432										RMO	EMO	-8.9345	2.67632	-3.33836	0.0047	-0.827673	-1.39451	-0.48567		α	σ	δ	Number(LSN)
CMO	1.11982	1.07976										ERMO	EMO	-12.1203	3.38173	-3.58405	0.0019	-0.656416	-1.19332	-0.40886		0.05	0.200952	0.286759	8.5734
CMO	0.826432	1.2794
CMO	1.02277	0.787752		neuropil								Nonparametric Comparisons For All Pairs Using Steel-Dwass Method										Power Details
CMO	0.968308	0.969016		Means and Std Deviations																		Test
EMO	1.66229	2.15187
EMO	1.58999	1.25848		Level	Number	Mean	Std Dev	Std Err Mean	Lower 95%	Upper 95%		Level	- Level	Score Mean Difference	Std Err Dif	Z	p-Value	Hodges-Lehmann	Lower CL	Upper CL		Power
EMO	1.68193	3.36273		CMO	14	1	0.168137	0.04494	0.9029	1.0971		ERMO	CMO	9.24248	3.40582	2.71373	0.0337	0.347897	0.00692	0.730821
EMO	2.16455	1.58752		EMO	7	1.80992	0.784203	0.2964	1.0847	2.5352		EMO	CMO	8.03571	2.87228	2.79768	0.0265	0.61213	0.15469	2.08333		α	σ	δ	Number	Power
EMO	2.61014	1.79162		RMO	12	1.20588	0.304676	0.08795	1.0123	1.3995		RMO	CMO	5.64881	3.00892	1.87736	0.2378	0.150621	-0.09882	0.499932		0.05	0.389523	0.252141	56	0.984
EMO	2.10195	1.57478		ERMO	19	1.36129	0.382667	0.08779	1.1768	1.5457		RMO	ERMO	-3.73904	3.35258	-1.11527	0.6801	-0.160154	-0.59474	0.22081
EMO	1.53284	0.942445										ERMO	EMO	-5.2782	3.38173	-1.5608	0.4012	-0.277822	-1.30856	0.31968		Least Significant Number
ERMO	1.27307	1.54632										RMO	EMO	-5.31548	2.67632	-1.98611	0.1932	-0.487508	-1.69714	0.164787
ERMO	1.24848	0.843314																				α	σ	δ	Number(LSN)
ERMO	1.06171	1.51857																				0.05	0.389523	0.252141	22.5039
ERMO	1.14277	1.37467		Level	Neuronal cell body layer	neuropil
ERMO	1.41636	1.95256		CMO	1	1
ERMO	1.21409	1.84515		EMO	1.90624	1.80992
ERMO	0.995716	1.9072		RMO	0.99514	1.20588
ERMO	1.22477	1.5138		ERMO	1.13185	1.36129
ERMO	1.12832	1.44478
ERMO	1.09057	1.9992			Std Err Mean	Std Err Mean
ERMO	1.09981	1.52449		CMO	0.03549	0.04494
ERMO	1.69486	1.34164		EMO	0.15038	0.2964
ERMO	1.10126	0.935802		RMO	0.07099	0.08795
ERMO	1.08883	0.967196		ERMO	0.0466	0.08779
ERMO	1.00587	0.985031
ERMO	1.07926	1.10123
ERMO	0.983806	1.0783
ERMO	0.971236	1.17276
ERMO	0.684414	0.812412
RMO	0.834253	1.18058
RMO	0.770046	1.07168
RMO	1.02613	1.24433
RMO	1.04466	1.66559
RMO	0.778814	1.87461
RMO	0.85462	1.10723
RMO	1.10433	1.05109
RMO	1.24377	0.919059
RMO	0.799364	1.28768
RMO	1.62026	1.30288
RMO	0.869284	0.912871
RMO	0.99609	0.852996
