# Supplementary material for: Role of the visual experience-dependent nascent proteome in neuronal plasticity
Source: eLife. 2018 Feb 7;7:e33420. doi: 10.7554/eLife.33420 (PMC5815848; doi:10.7554/eLife.33420)
Supplement: Figure 6—source data 1. — Quantification of growth rate in the dark or VE and TDBL at T1 presented in Figure 6E–G and raw data presented in Figure 6H. [file elife-33420-fig6-data1.xlsx]

## Sheet: FIg 6B-B’
	T1	Dark	VE						two-tailed paired Student’s t test		CMO
CMO	232.087	-38.862	49.791
CMO	255.446	19.631	127.086								Difference: Light-Dark
CMO	251.513	29.01	171.942
CMO	199.359	55.786	96.836								Light	111.41	t-Ratio	4.35684
CMO	199.372	42.066	124.01								Dark	25.6068	DF	8
CMO	379.365	-9.832	25.856								Mean Difference	85.803	Prob > |t|	0.0024
CMO	428.045	67.998	61.383								Std Error	19.6939	Prob > t	0.0012
CMO	205.412	25.512	115.488								Upper 95%	131.217	Prob < t	0.9988
CMO	277.49	39.152	230.296								Lower 95%	40.3888
Average	269.788	25.6068	111.41								N	9
											Correlation	0.38342
	T1	Dark	VE
EMO+RMO	224.126	82.305	119.864								EMO+RMO
EMO+RMO	168.038	-7.391	42.746
EMO+RMO	134.178	57.263	24.823								Difference: VE-Dark
EMO+RMO	179.376	109.554	-5.107
EMO+RMO	140.312	60.325	26.912								VE	39.8161	t-Ratio	-0.5726
EMO+RMO	286.77	17.496	59.48								Dark	53.0224	DF	10
EMO+RMO	213.579	38.851	53.337								Mean Difference	-13.206	Prob > |t|	0.5796
EMO+RMO	280.939	50.556	-16.902								Std Error	23.0637	Prob > t	0.7102
EMO+RMO	99.1154	139.189	-23.617								Upper 95%	38.1829	Prob < t	0.2898
EMO+RMO	209.524	26.521	107.197								Lower 95%	-64.596
EMO+RMO	151.603	8.578	49.244								N	11
Average	189.778	53.0224	39.8161								Correlation	-0.4413

## Sheet: Fig6D-D’
	T1	Dark	VE						two-tailed paired Student’s t test		CMO
CMO	249.253	45.002	59.861
CMO	287.94	14.692	43.178								Difference: VE-Dark
CMO	241.727	-4.473	29.615
CMO	162.686	1.785	64.796								VE	72.3713	t-Ratio	3.04903
CMO	429.595	54.578	100.724								Dark	22.9086	DF	6
CMO	151.505	1.943	141.521								Mean Difference	49.4627	Prob > |t|	0.0225
CMO	137.751	46.833	66.904								Std Error	16.2224	Prob > t	0.0113
Average	237.208	22.9086	72.3713								Upper 95%	89.1576	Prob < t	0.9887
											Lower 95%	9.76787
											N	7
											Correlation	0.10803
	T1	T2-T1	T3-T2								EMO+FMO+RMO
EMO+FMO+RMO	250.022	137.345	40.07
EMO+FMO+RMO	122.072	-2.468	74.234								Difference: VE-Dark
EMO+FMO+RMO	153.52	-17.808	13.245
EMO+FMO+RMO	134.748	58.373	3.758								VE	25.0068	t-Ratio	-1.27016
EMO+FMO+RMO	164.593	19.164	17.67								Dark	41.9788	DF	16
EMO+FMO+RMO	154.148	66.674	27.347								Mean Difference	-16.972	Prob > |t|	0.2222
EMO+FMO+RMO	105.249	42.966	-7.916								Std Error	13.3621	Prob > t	0.8889
EMO+FMO+RMO	76.6474	26.4136	-3.053								Upper 95%	11.3544	Prob < t	0.1111
EMO+FMO+RMO	109.377	16.51	41.1								Lower 95%	-45.298
EMO+FMO+RMO	135.241	-29.529	74.026								N	17
EMO+FMO+RMO	78.2316	55.2154	17.017								Correlation	-0.1936
EMO+FMO+RMO	155.611	56.616	15.655
EMO+FMO+RMO	246.475	94.597	47.848
EMO+FMO+RMO	137.284	110.681	21.766
EMO+FMO+RMO	255.526	0.462	27.001
EMO+FMO+RMO	215.241	19.656	19.036
EMO+FMO+RMO	209.634	58.771	-3.689
Average	159.036	41.9788	25.0068

## Sheet: Fig6E-G
TDBL		Dark	VE	T1
CMO	2	-38.862	49.791	232.087
CMO	1	19.631	127.086	255.446				Oneway Analysis of Dark By TDBL										Oneway Analysis of VE By TDBL										Oneway Analysis of T1 By TDBL
CMO	1	29.01	171.942	251.513
CMO	4	55.786	96.836	199.359
CMO	6.1	42.066	124.01	199.372
CMO	6.2	-9.832	25.856	379.365				Means and Std Deviations										Means and Std Deviations										Means and Std Deviations
CMO	11.1.2	67.998	61.383	428.045
CMO	11.1.3	25.512	115.488	205.412				Level	Number	Mean	Std Dev	Std Err Mean	Lower 95%	Upper 95%				Level	Number	Mean	Std Dev	Std Err Mean	Lower 95%	Upper 95%				Level	Number	Mean	Std Dev	Std Err Mean	Lower 95%	Upper 95%
CMO	6	39.152	230.296	277.49				CMO	38	18.8532	32.6498	5.296	8.12	29.585				CMO	38	85.3482	45.9195	7.449	70.255	100.44				CMO	38	289.131	130.346	21.145	246.29	331.97
CMO	1.1	5.333	79.233	330.309				EMO	17	31.0011	49.9904	12.124	5.3	56.704				EMO	17	55.9351	65.129	15.796	22.449	89.42				EMO	17	287.278	197.923	48.003	185.52	389.04
CMO	1.3	12.523	65.689	199.852				RMO	10	28.1602	58.3203	18.442	-13.56	69.88				RMO	10	56.9007	66.0195	20.877	9.673	104.13				RMO	10	249.727	77.971	24.656	193.95	305.5
CMO	2.1	64.563	134.31	292.832				FMO	9	38.4763	62.8095	20.936	-9.8	86.756				FMO	9	49.3738	58.7809	19.594	4.191	94.56				FMO	9	353.258	69.542	23.181	299.8	406.71
CMO	8.1	49.644	125.946	210.731				EMO+RMO	11	53.0224	43.9837	13.262	23.47	82.571				EMO+RMO	11	39.8161	46.1139	13.904	8.836	70.8				EMO+RMO	11	189.778	59.708	18.003	149.67	229.89
CMO	8.2	0.685	27.404	224.491				EMO+FMO+RMO	17	41.9788	45.0216	10.919	18.83	65.127				EMO+FMO+RMO	17	25.0068	24.2114	5.872	12.558	37.46				EMO+FMO+RMO	17	159.036	57.403	13.922	129.52	188.55
CMO	8	23.11	128.695	397.784
CMO	10	-6.024	54.468	311
CMO	12	28.495	55.04	336.528
CMO	2.1	-3.772	36.925	874.645
CMO	2.2	6.845	92.507	181.112
CMO	1.1	-3.347	122.336	238.35
CMO	1.2.1	-34.361	108.093	248.427				Nonparametric Comparisons With Control Using Steel Method										Nonparametric Comparisons With Control Using Steel Method										Nonparametric Comparisons With Control Using Steel Method
CMO	1.2.2	-3.069	57.262	434.604				Control Group =	CMO									Control Group =	CMO									Control Group =	CMO
CMO	2	-22.716	13.294	339.727
CMO	5	25.02	69.408	263.208				q*	Alpha									q*	Alpha									q*	Alpha
CMO	5.2	-1.107	73.514	175.64				2.55638	0.05									2.55638	0.05									2.55638	0.05
CMO	1	-18.582	24.423	278.547
CMO	3.1	76.652	114.882	298.852
CMO	3.2	81.259	113.928	376.278
CMO	6.1	-50.911	38.919	384.323				Level	- Level	Score Mean Difference	Std Err Dif	Z	p-Value	Hodges-Lehmann	Lower CL	Upper CL		Level	- Level	Score Mean Difference	Std Err Dif	Z	p-Value	Hodges-Lehmann	Lower CL	Upper CL		Level	- Level	Score Mean Difference	Std Err Dif	Z	p-Value	Hodges-Lehmann	Lower CL	Upper CL
CMO	6.2	62.116	101.247	108.57				EMO	CMO	2.17105	4.67466	0.46443	0.9929	3.143	-22.929	32.725		EMO	CMO	-6.8537	4.67466	-1.46614	0.5109	-30.3835	-77.484	19.839		EMO	CMO	-3.6184	4.67466	-0.77405	0.935	-21.851	-106.934	75.982
CMO	9	33.246	96.422	392.619				RMO	CMO	4.86316	4.97573	0.977376	0.8454	15.9535	-31.78	61.014		RMO	CMO	-9.1579	4.97573	-1.84051	0.2723	-31.3284	-83.658	17.297		RMO	CMO	-2.9684	4.97573	-0.59658	0.9781	-17.909	-121.889	62.208
CMO	9.1	45.002	59.861	249.253				FMO	CMO	2.40497	5.08294	0.473146	0.9922	11.4895	-37.798	75.085		FMO	CMO	-8.864	5.08294	-1.74388	0.3263	-36.4735	-92.881	19.563		FMO	CMO	11.6126	5.08294	2.28462	0.102	81.319	-18.752	163.997
CMO	17	14.692	43.178	287.94				EMO+RMO	CMO	10.8433	4.89218	2.21646	0.1204	30.9595	-5.23	69.138		EMO+RMO	CMO	-13.305	4.89218	-2.71965	0.0313	-45.551	-86.31	-1.033		EMO+RMO	CMO	-13.7739	4.89218	-2.8155	0.0235	-83.653	-165.786	-9.455
CMO	18.2	-4.473	29.615	241.727				EMO+FMO+RMO	CMO	8.21594	4.67466	1.75755	0.3183	20.2765	-9.625	55.445		EMO+FMO+RMO	CMO	-21.4125	4.67466	-4.58056	<.0001	-55.529	-88.749	-28.039		EMO+FMO+RMO	CMO	-19.7949	4.67466	-4.23451	0.0001	-116.275	-178.563	-49.801
CMO	12	1.785	64.796	162.686
CMO	22.1	54.578	100.724	429.595
CMO	22.2	1.943	141.521	151.505
CMO	22.21	46.833	66.904	137.751
EMO	3.2	-18.186	173.926	253.784				Power Details										Power Details										Power Details
EMO	11	2.0256	56.6867	70.5907				Test	TDBL									Test	TDBL									Test	TDBL
EMO	4	46.98	35.667	480.17
EMO	6	29.641	-23.679	238.668
EMO	10.1	-0.27	117.985	185.81				Power										Power										Power
EMO	10.2	-3.0654	117.019	98.4778
EMO	10.3	84.882	144.52	931.978				α	σ	δ	Number	Power						α	σ	δ	Number	Power						α	σ	δ	Number	Power
EMO	10.4	35.345	93.353	190.071				0.05	44.8812	11.5359	102	0.458						0.05	50.3529	22.379	102	0.9411						0.05	122.355	58.698	102	0.9706
EMO	1.1	6.081	67.218	121.355
EMO	1.2	-6.486	-19.649	369.577
EMO	3.1	21.891	74.375	328.211
EMO	3.2	25.785	54.367	335.414
EMO	4.1	28.657	115.863	296.119				Least Significant Number										Least Significant Number										Least Significant Number
EMO	6.1	8.474	-8.368	247.732
EMO	6.22	181.232	-34.306	367.979				α	σ	δ	Number(LSN)							α	σ	δ	Number(LSN)							α	σ	δ	Number(LSN)
EMO	7	-12.512	-20.896	195.697				0.05	44.8812	11.5359	171.7							0.05	50.3529	22.379	60.367							0.05	122.355	58.698	52.4709
EMO	9	96.544	6.815	172.099
FMO	3.1	34.989	63.947	482.871
FMO	3.2	-4.552	48.302	399.387
FMO	8	150.664	6.978	280.1
FMO	10	73.978	152.986	394.423
FMO	3	-46.352	111.904	374.728
FMO	7	52.204	-35.619	342.134
FMO	12.1	-7.465	32.661	263.7
FMO	12.2	-9.399	69.354	352.823
FMO	8	102.22	-6.149	289.154
EMO+FMO+RMO	2.2	137.345	40.07	250.022
EMO+FMO+RMO	3.1	-2.468	74.234	122.072
EMO+FMO+RMO	3.2	-17.808	13.245	153.52
EMO+FMO+RMO	4	58.373	3.758	134.748
EMO+FMO+RMO	6.1	19.164	17.67	164.593
EMO+FMO+RMO	6.2	66.674	27.347	154.148
EMO+FMO+RMO	7	42.966	-7.916	105.249
EMO+FMO+RMO	8	26.4136	-3.053	76.6474
EMO+FMO+RMO	12.1	16.51	41.1	109.377
EMO+FMO+RMO	12.2	-29.529	74.026	135.241
EMO+FMO+RMO	14.1	55.2154	17.017	78.2316
EMO+FMO+RMO	3.1	56.616	15.655	155.611
EMO+FMO+RMO	3.2	94.597	47.848	246.475
EMO+FMO+RMO	7	110.681	21.766	137.284
EMO+FMO+RMO	15	0.462	27.001	255.526
EMO+FMO+RMO	16.1	19.656	19.036	215.241
EMO+FMO+RMO	16.2	58.771	-3.689	209.634
EMO+RMO	9	82.305	119.864	224.126
EMO+RMO	17	-7.391	42.746	168.038
EMO+RMO	18	57.263	24.823	134.178
EMO+RMO	10	109.554	-5.107	179.376
EMO+RMO	13	60.325	26.912	140.312
EMO+RMO	9.2	17.496	59.48	286.77
EMO+RMO	12	38.851	53.337	213.579
EMO+RMO	7	50.556	-16.902	280.939
EMO+RMO	10	139.189	-23.617	99.1154
EMO+RMO	10.2	26.521	107.197	209.524
EMO+RMO	11	8.578	49.244	151.603
RMO	8	78.067	-30.545	178.514
RMO	10	-98.36	28.799	383.728
RMO	9.1	30.46	84.201	243.451
RMO	9.2	-6.76	56.493	239.518
RMO	11	100.166	206.264	303.935
RMO	12.1	10.78	31.83	294.127
RMO	12.2	68.282	111.463	263.718
RMO	2	63.045	46.031	229.819
RMO	4	52.362	-3.567	270.73
RMO	10.1	-16.4404	38.0383	89.7251
		Dark	VE	T1
CMO		18.8532	85.3482	289.131
EMO		31.0011	55.9351	287.278
FMO		38.4763	49.3738	353.258
RMO		28.1602	56.9007	249.727
EMO+RMO		53.0224	39.8161	189.778
EMO+FMO+RMO		41.9788	25.0068	159.036
SEM		Dark	VE	T1
CMO		5.29649	7.44913	21.1449
EMO		12.1244	15.7961	48.0035
FMO		20.9365	19.5936	23.1807
RMO		18.4425	20.8772	24.6565
MMO		13.9823	8.44804	14.5077
MMO3		10.1985	9.39322	13.2518

## Sheet: Fig6H
	(TDBL_VE)-(TDBL_Dark)		note		to be significant: p< 0.008333333 (0.05/6)
CMO	88.653	1	1=cells respond to VE ((TDBL_VE)-(TDBL_Dark)>0)		CMO	chi-square:	22.0618
CMO	107.455	1	0=cells failed to respond to VE ((TDBL_VE)-(TDBL_Dark)<0)		all others	d.f.:	1
CMO	142.932	1				P-value:	2.64011e-06
CMO	41.05	1				minimum expected:	11.549
CMO	81.944	1				w (effect size for power calculation):	0.767995
CMO	35.688	1
CMO	-6.615	0			EMO	chi-square:	0.779673
CMO	89.976	1			all others	d.f.:	1
CMO	191.144	1				P-value:	0.377241
CMO	73.9	1				minimum expected:	5.42857
CMO	53.166	1				w (effect size for power calculation):	0.130536
CMO	69.747	1
CMO	76.302	1			FMO	chi-square:	0.0403629
CMO	26.719	1			all others	d.f.:	1
CMO	105.585	1				P-value:	0.840773
CMO	60.492	1				minimum expected:	2.73529
CMO	26.545	1				w (effect size for power calculation):	0.0328495
CMO	40.697	1
CMO	85.662	1			RMO	chi-square:	0.000805958
CMO	125.683	1			all others	d.f.:	1
CMO	142.454	1				P-value:	0.977352
CMO	60.331	1				minimum expected:	3.03922
CMO	36.01	1				w (effect size for power calculation):	0.00464188
CMO	44.388	1
CMO	74.621	1			EMO+RMO	chi-square:	1.32227
CMO	43.005	1			all others	d.f.:	1
CMO	38.23	1				P-value:	0.250185
CMO	32.669	1				minimum expected:	3.34314
CMO	89.83	1				w (effect size for power calculation):	0.188017
CMO	39.131	1
CMO	63.176	1			EMO+FMO+RMO	chi-square:	15.5804
CMO	14.859	1			all others	d.f.:	1
CMO	28.486	1				P-value:	7.90711e-05
CMO	34.088	1				minimum expected:	5.16667
CMO	63.011	1				w (effect size for power calculation):	0.645397
CMO	46.146	1
CMO	139.578	1
CMO	20.071	1
EMO	192.112	1
EMO	54.6611	1
EMO	-11.313	0
EMO	-53.32	0
EMO	118.255	1
EMO	120.084	1
EMO	59.638	1
EMO	58.008	1
EMO	61.137	1
EMO	-13.163	0
EMO	52.484	1
EMO	28.582	1
EMO	87.206	1
EMO	-16.842	0
EMO	-215.538	0
EMO	-8.384	0
EMO	-89.729	0
FMO	28.958	1
FMO	52.854	1
FMO	-143.686	0
FMO	79.008	1
FMO	158.256	1
FMO	-87.823	0
FMO	40.126	1
FMO	78.753	1
FMO	-108.369	0
EMO+FMO+RMO	-97.275	0
EMO+FMO+RMO	76.702	1
EMO+FMO+RMO	31.053	1
EMO+FMO+RMO	-54.615	0
EMO+FMO+RMO	-1.494	0
EMO+FMO+RMO	-39.327	0
EMO+FMO+RMO	-50.882	0
EMO+FMO+RMO	-29.4666	0
EMO+FMO+RMO	24.59	1
EMO+FMO+RMO	103.555	1
EMO+FMO+RMO	-38.1984	0
EMO+FMO+RMO	-40.961	0
EMO+FMO+RMO	-46.749	0
EMO+FMO+RMO	-88.915	0
EMO+FMO+RMO	26.539	1
EMO+FMO+RMO	-0.62	0
EMO+FMO+RMO	-62.46	0
EMO+RMO	37.559	1
EMO+RMO	50.137	1
EMO+RMO	-32.44	0
EMO+RMO	-114.661	0
EMO+RMO	-33.413	0
EMO+RMO	41.984	1
EMO+RMO	14.486	1
EMO+RMO	-67.458	0
EMO+RMO	-162.806	0
EMO+RMO	80.676	1
EMO+RMO	40.666	1
RMO	-108.612	0
RMO	127.159	1
RMO	53.741	1
RMO	63.253	1
RMO	106.098	1
RMO	21.05	1
RMO	43.181	1
RMO	-17.014	0
RMO	-55.929	0
RMO	54.4787	1
	Total cell numbers	cells respond to VE	cells failed to respond to VE	% of cells respond to VE	% of cells failed to respond to VE
CMO	38	37	1	0.973684	0.0263158
EMO	17	10	7	0.588235	0.411765
FMO	9	6	3	0.666667	0.333333
RMO	10	7	3	0.7	0.3
EMO+RMO	11	6	5	0.545455	0.454545
EMO+FMO+RMO	17	5	12	0.294118	0.705882
