# Supplementary material for: Role of the visual experience-dependent nascent proteome in neuronal plasticity
Source: eLife. 2018 Feb 7;7:e33420. doi: 10.7554/eLife.33420 (PMC5815848; doi:10.7554/eLife.33420)
Supplement: Figure 7—source data 1. [file elife-33420-fig7-data1.xlsx]

## Sheet: Source data Fig7B and 7C
Figure 7B
Normalized Avoidance index	-1 h	5h	24h		CMO
CMO		1.37255	0.823529		Level	Number	Mean	Std Dev	Std Err Mean
CMO	1.09804		1.37255		-1 h	21	1	0.343578	0.07497					Power Details
CMO			1.83007		5h	27	1.32285	0.447629	0.08615					Test	Arranged
CMO					0
CMO		1.37255	1.37255		24h	31	1.47947	0.485036	0.08711
CMO			2.28758											Power
CMO	0.784314		1.56863
CMO	1.17647				CMO									α	σ	δ	Number	Power
CMO		1.17647	1.37255		Nonparametric Comparisons With Control Using Steel Method									0.05	0.438724	0.191675	79	0.9363
CMO			0.915033		Control Group		Before 1h
CMO
CMO		1.09804			q*	Alpha
CMO					2.2019	0.05
CMO	1.09804	0.784314	1.17647											Least Significant Number
CMO	0.823529	1.09804	1.37255
CMO	0.823529	1.56863												α	σ	δ	Number(LSN)
CMO	1.09804	0.823529			Level	- Level	Score Mean Difference	Std Err Dif	Z	p-Value	Hodges-Lehmann	Lower CL	Upper CL	0.05	0.438724	0.191675	34.5658
CMO	1.09804		1.92157		24h	Before 1h	14.2581	4.27525	3.33502	0.0017	0.468825	0.189189	0.793853
CMO					5h	Before 1h	10.2011	4.06377	2.51024	0.0223	0.337043	0.0176612	0.54902
CMO
CMO			1.13514
CMO			1.13514
CMO		0.42042	0.756757
CMO		1.26126	1.89189
CMO			1.51351
CMO		0.756757	1.62162
CMO	1.51351	1.13514	1.13514
CMO		0.756757	1.51351
CMO	1.13514
CMO		1.51351	1.89189
CMO	0.945946	1.51351
CMO		1.62162	1.89189
CMO		1.13514
CMO	1.51351	1.62162	1.89189
CMO		1.62162	0.945946
CMO		0.756757
CMO		1.08108
CMO	0.378378
CMO	0.378378
CMO	1.13514
CMO
CMO			0.763791
CMO
CMO			0.534653
CMO		1.60396	1.60396
CMO		2.13861	2.13861
CMO			2.13861
CMO
CMO		1.60396	2.13861
CMO			1.06931
CMO	1.06931		2.13861
CMO	0.534653
CMO		2.13861
CMO		2.13861
CMO	1.60396	1.60396
CMO	1.18812
CMO
CMO	0.534653
CMO	1.06931
Figure 7C
EFRMO		1.76048	1.46707		EFRMO
EFRMO		0.652029	1.46707		Level	Number	Mean	Std Dev	Std Err Mean					Power Details
EFRMO		1.46707	1.46707		Before 1h	22	1	0.465704	0.09929					Test	Arranged
EFRMO			1.17365		5h	33	1.18965	0.443277	0.07716
EFRMO		1.46707
EFRMO			1.46707		24h	33	1.18382	0.435166	0.07575					Power
EFRMO			2.05389
EFRMO	1.46707													α	σ	δ	Number	Power
EFRMO		1.76048												0.05	0.445925	0.080899	88	0.302
EFRMO		1.17365	0.88024
EFRMO			0.838323		EFRMO
EFRMO	0.838323	1.17365	0.978044		Nonparametric Comparisons With Control Using Steel Method
EFRMO		1.46707			Control Group		Before 1h
EFRMO		1.25749	0.838323											Least Significant Number
EFRMO	0.586826	0.978044	1.46707		q*	Alpha
EFRMO		0.88024			2.19872	0.05								α	σ	δ	Number(LSN)
EFRMO		0.88024												0.05	0.445925	0.080899	185.068
EFRMO		1.83383	0.838323
EFRMO	0.586826		1.46707
EFRMO		0.978044	1.95609		Level	- Level	Score Mean Difference	Std Err Dif	Z	p-Value	Hodges-Lehmann	Lower CL	Upper CL
EFRMO	0.88024	1.46707	0.914286		5h	Before 1h	7.57576	4.40083	1.72144	0.1452	0.234405	-0.050528	0.474765
EFRMO	0.88024		1.23429		24h	Before 1h	7.04545	4.39876	1.60169	0.1835	0.23278	-0.051429	0.548571
EFRMO		0.411429	1.23429
EFRMO	1.76048	1.23429	1.23429
EFRMO		0.822857	0.685714
EFRMO	1.23429	1.64571
EFRMO	1.64571	1.23429	1.02857
EFRMO	0.822857	2.05714	1.64571
EFRMO	2.05714	1.23429	1.23429
EFRMO
EFRMO	0.822857
EFRMO	1.64571	0.822857	0.822857
EFRMO		0.587755	1.37143
EFRMO		2.05714	0.411429
EFRMO
EFRMO	0.685714	1.02857	1.64571
EFRMO		1.37143	0.514286
EFRMO	1.02857		0.411429
EFRMO			1.17551
EFRMO
EFRMO	0.411429	0.411429
EFRMO	0.411429
EFRMO	0.822857
EFRMO	0.411429
EFRMO			1.71429
EFRMO
EFRMO
EFRMO		1.28571
EFRMO
EFRMO		1.28571	1.28571
EFRMO			1.71429
EFRMO	1.28571		0.428571
EFRMO
EFRMO		1.28571
EFRMO		0.857143
EFRMO
EFRMO	0.857143	0.428571
EFRMO	0.857143
