# Supplementary material for: Role of the visual experience-dependent nascent proteome in neuronal plasticity
Source: eLife. 2018 Feb 7;7:e33420. doi: 10.7554/eLife.33420 (PMC5815848; doi:10.7554/eLife.33420)
Supplement: Supplementary file 1. — Related to Figure 1. List of genes identified by searching MS/MS spectra against three different databases, including Uniprot Xenopus laevis database, Xenbase, and PHROG and then converted to human homologs by gene symbol. From two independent experiments, we identified 4833 unmodified proteins in the global brain proteome (sheet 1) and 835 AHA-labeled NSPs in the nascent proteome (sheet 2). [file elife-33420-supp1.xlsx]

## Sheet: Global brain proteome
UniprotKB	Gene Symbol	Protein Name
P01023	A2M	Alpha-2-macroglobulin
A8K2U0	A2ML1	Alpha-2-macroglobulin-like protein 1
Q9NRG9	AAAS	Aladin
Q86V21	AACS	Acetoacetyl-CoA synthetase
P22760	AADAC	Arylacetamide deacetylase
Q8N5Z0	AADAT	Kynurenine/alpha-aminoadipate aminotransferase, mitochondrial
Q2M2I8	AAK1	AP2-associated protein kinase 1
P49588	AARS	Alanine--tRNA ligase, cytoplasmic
Q5JTZ9	AARS2	Alanine--tRNA ligase, mitochondrial
Q9BTE6	AARSD1	Alanyl-tRNA editing protein Aarsd1
Q9UDR5	AASS	Alpha-aminoadipic semialdehyde synthase, mitochondrial
Q9NY61	AATF	Protein AATF
P80404	ABAT	4-aminobutyrate aminotransferase, mitochondrial
P08183	ABCB1	Multidrug resistance protein 1
Q9NRK6	ABCB10	ATP-binding cassette sub-family B member 10, mitochondrial
O75027	ABCB7	ATP-binding cassette sub-family B member 7, mitochondrial
Q9NUT2	ABCB8	ATP-binding cassette sub-family B member 8, mitochondrial
P28288	ABCD3	ATP-binding cassette sub-family D member 3
P61221	ABCE1	ATP-binding cassette sub-family E member 1
Q8NE71	ABCF1	ATP-binding cassette sub-family F member 1
Q9UG63	ABCF2	ATP-binding cassette sub-family F member 2
Q9NUQ8	ABCF3	ATP-binding cassette sub-family F member 3
Q9UNQ0	ABCG2	ATP-binding cassette sub-family G member 2
Q9NUJ1	ABHD10	Mycophenolic acid acyl-glucuronide esterase, mitochondrial
Q8NFV4	ABHD11	Alpha/beta hydrolase domain-containing protein 11
Q8N2K0	ABHD12	Monoacylglycerol lipase ABHD12
Q9BUJ0	ABHD14A	Alpha/beta hydrolase domain-containing protein 14A
Q96IU4	ABHD14B	Alpha/beta hydrolase domain-containing protein 14B
O95870	ABHD16A	Abhydrolase domain-containing protein 16A
Q5VST6	ABHD17B	Alpha/beta hydrolase domain-containing protein 17B
Q8IZP0	ABI1	Abl interactor 1
Q9NYB9	ABI2	Abl interactor 2
P42684	ABL2	Abelson tyrosine-protein kinase 2
O14639	ABLIM1	Actin-binding LIM protein 1
Q6H8Q1	ABLIM2	Actin-binding LIM protein 2
Q12979	ABR	Active breakpoint cluster region-related protein
P09110	ACAA1	3-ketoacyl-CoA thiolase, peroxisomal
P42765	ACAA2	3-ketoacyl-CoA thiolase, mitochondrial
Q13085	ACACA	Acetyl-CoA carboxylase 1
O00763	ACACB	Acetyl-CoA carboxylase 2
Q9UKU7	ACAD8	Isobutyryl-CoA dehydrogenase, mitochondrial
Q9H845	ACAD9	Acyl-CoA dehydrogenase family member 9, mitochondrial
P28330	ACADL	Long-chain specific acyl-CoA dehydrogenase, mitochondrial
P11310	ACADM	Medium-chain specific acyl-CoA dehydrogenase, mitochondrial
P45954	ACADSB	Short/branched chain specific acyl-CoA dehydrogenase, mitochondrial
P49748	ACADVL	Very long-chain specific acyl-CoA dehydrogenase, mitochondrial
Q15057	ACAP2	Arf-GAP with coiled-coil, ANK repeat and PH domain-containing protein 2
Q96P50	ACAP3	Arf-GAP with coiled-coil, ANK repeat and PH domain-containing protein 3
P24752	ACAT1	Acetyl-CoA acetyltransferase, mitochondrial
Q9BWD1	ACAT2	Acetyl-CoA acetyltransferase, cytosolic
Q9H3P7	ACBD3	Golgi resident protein GCP60
Q5T8D3	ACBD5	Acyl-CoA-binding domain-containing protein 5
Q9BR61	ACBD6	Acyl-CoA-binding domain-containing protein 6
Q8N6N7	ACBD7	Acyl-CoA-binding domain-containing protein 7
Q96AP0	ACD	Adrenocortical dysplasia protein homolog
P12821	ACE	Angiotensin-converting enzyme
P22303	ACHE	Acetylcholinesterase
Q9UKV3	ACIN1	Apoptotic chromatin condensation inducer in the nucleus
P53396	ACLY	ATP-citrate synthase
P21399	ACO1	Cytoplasmic aconitate hydratase
Q99798	ACO2	Aconitate hydratase, mitochondrial
O00154	ACOT7	Cytosolic acyl coenzyme A thioester hydrolase
Q9Y305	ACOT9	Acyl-coenzyme A thioesterase 9, mitochondrial
Q15067	ACOX1	Peroxisomal acyl-coenzyme A oxidase 1
Q9NUZ1	ACOXL	Acyl-coenzyme A oxidase-like protein
P24666	ACP1	Low molecular weight phosphotyrosine protein phosphatase
P11117	ACP2	Lysosomal acid phosphatase
Q9NPH0	ACP6	Lysophosphatidic acid phosphatase type 6
Q5FVE4	ACSBG2	Long-chain-fatty-acid--CoA ligase ACSBG2
Q96CM8	ACSF2	Acyl-CoA synthetase family member 2, mitochondrial
P33121	ACSL1	Long-chain-fatty-acid--CoA ligase 1
O95573	ACSL3	Long-chain-fatty-acid--CoA ligase 3
O60488	ACSL4	Long-chain-fatty-acid--CoA ligase 4
Q9NR19	ACSS2	Acetyl-coenzyme A synthetase, cytoplasmic
P68133	ACTA1	Actin, alpha skeletal muscle
P60709	ACTB	Actin, cytoplasmic 1
P68032	ACTC1	Actin, alpha cardiac muscle 1
P63261	ACTG1	Actin, cytoplasmic 2
O96019	ACTL6A	Actin-like protein 6A
P12814	ACTN1	Alpha-actinin-1
P35609	ACTN2	Alpha-actinin-2
Q08043	ACTN3	Alpha-actinin-3
O43707	ACTN4	Alpha-actinin-4
Q9NZ32	ACTR10	Actin-related protein 10
P61163	ACTR1A	Alpha-centractin
P61160	ACTR2	Actin-related protein 2
P61158	ACTR3	Actin-related protein 3
Q9GZN1	ACTR6	Actin-related protein 6
Q9H981	ACTR8	Actin-related protein 8
Q03154	ACY1	Aminoacylase-1
P07311	ACYP1	Acylphosphatase-1
O14672	ADAM10	Disintegrin and metalloproteinase domain-containing protein 10
P78536	ADAM17	Disintegrin and metalloproteinase domain-containing protein 17
Q9P0K1	ADAM22	Disintegrin and metalloproteinase domain-containing protein 22
O75689	ADAP1	Arf-GAP with dual PH domain-containing protein 1
P55265	ADAR	Double-stranded RNA-specific adenosine deaminase
P78563	ADARB1	Double-stranded RNA-specific editase 1
Q96D53	ADCK4	AarF domain-containing protein kinase 4
O43306	ADCY6	Adenylate cyclase type 6
P18509	ADCYAP1	Pituitary adenylate cyclase-activating polypeptide
P41586	ADCYAP1R1	Pituitary adenylate cyclase-activating polypeptide type I receptor
P35611	ADD1	Alpha-adducin
P35612	ADD2	Beta-adducin
Q9UEY8	ADD3	Gamma-adducin
P11766	ADH5	Alcohol dehydrogenase class-3
P55263	ADK	Adenosine kinase
Q9H2P0	ADNP	Activity-dependent neuroprotector homeobox protein
Q96SZ5	ADO	2-aminoethanethiol dioxygenase
Q9BRR6	ADPGK	ADP-dependent glucokinase
Q9NX46	ADPRHL2	Poly(ADP-ribose) glycohydrolase ARH3
Q3LIE5	ADPRM	Manganese-dependent ADP-ribose/CDP-alcohol diphosphatase
P35626	ADRBK2	Beta-adrenergic receptor kinase 2
Q16186	ADRM1	Proteasomal ubiquitin receptor ADRM1
P30566	ADSL	Adenylosuccinate lyase
P30520	ADSS	Adenylosuccinate synthetase isozyme 2
Q6ZN18	AEBP2	Zinc finger protein AEBP2
Q08117	AES	Amino-terminal enhancer of split
Q9UHB7	AFF4	AF4/FMR2 family member 4
Q9Y4W6	AFG3L2	AFG3-like protein 2
Q6ULP2	AFTPH	Aftiphilin
Q9UPQ3	AGAP1	Arf-GAP with GTPase, ANK repeat and PH domain-containing protein 1
Q99490	AGAP2	Arf-GAP with GTPase, ANK repeat and PH domain-containing protein 2
Q96P47	AGAP3	Arf-GAP with GTPase, ANK repeat and PH domain-containing protein 3
P52594	AGFG1	Arf-GAP domain and FG repeat-containing protein 1
Q53H12	AGK	Acylglycerol kinase, mitochondrial
P35573	AGL	Glycogen debranching enzyme
Q9BSE5	AGMAT	Agmatinase, mitochondrial
Q9UL18	AGO1	Protein argonaute-1
Q9HCK5	AGO4	Protein argonaute-4
Q99943	AGPAT1	1-acyl-sn-glycerol-3-phosphate acyltransferase alpha
O00116	AGPS	Alkyldihydroxyacetonephosphate synthase, peroxisomal
O95994	AGR2	Anterior gradient protein 2 homolog
Q8TD06	AGR3	Anterior gradient protein 3 homolog
O00468	AGRN	Agrin
Q9UPW5	AGTPBP1	Cytosolic carboxypeptidase 1
Q8WYP5	AHCTF1	Protein ELYS
P23526	AHCY	Adenosylhomocysteinase
O43865	AHCYL1	Adenosylhomocysteinase 2
Q96HN2	AHCYL2	Adenosylhomocysteinase 3
Q5TGY3	AHDC1	AT-hook DNA-binding motif-containing protein 1
Q09666	AHNAK	Neuroblast differentiation-associated protein AHNAK
O95433	AHSA1	Activator of 90 kDa heat shock protein ATPase homolog 1
Q96BJ3	AIDA	Axin interactor, dorsalization-associated protein
O95831	AIFM1	Apoptosis-inducing factor 1, mitochondrial
Q12904	AIMP1	Aminoacyl tRNA synthase complex-interacting multifunctional protein 1
Q13155	AIMP2	Aminoacyl tRNA synthase complex-interacting multifunctional protein 2
O00170	AIP	AH receptor-interacting protein
P00568	AK1	Adenylate kinase isoenzyme 1
P54819	AK2	Adenylate kinase 2, mitochondrial
Q9UIJ7	AK3	GTP:AMP phosphotransferase AK3, mitochondrial
P27144	AK4	Adenylate kinase 4, mitochondrial
Q9Y6K8	AK5	Adenylate kinase isoenzyme 5
Q92667	AKAP1	A-kinase anchor protein 1, mitochondrial
O43572	AKAP10	A-kinase anchor protein 10, mitochondrial
Q02952	AKAP12	A-kinase anchor protein 12
Q9P0M2	AKAP7	A-kinase anchor protein 7 isoform gamma
Q9ULX6	AKAP8L	A-kinase anchor protein 8-like
Q99996	AKAP9	A-kinase anchor protein 9
P14550	AKR1A1	Alcohol dehydrogenase [NADP(+)]
P15121	AKR1B1	Aldose reductase
C9JRZ8	AKR1B15	Aldo-keto reductase family 1 member B15
Q04828	AKR1C1	Aldo-keto reductase family 1 member C1
P52895	AKR1C2	Aldo-keto reductase family 1 member C2
P42330	AKR1C3	Aldo-keto reductase family 1 member C3
P17516	AKR1C4	Aldo-keto reductase family 1 member C4
Q5T2L2	AKR1C8P	Putative aldo-keto reductase family 1 member C8
O43488	AKR7A2	Aflatoxin B1 aldehyde reductase member 2
P31749	AKT1	RAC-alpha serine/threonine-protein kinase
Q96B36	AKT1S1	Proline-rich AKT1 substrate 1
P31751	AKT2	RAC-beta serine/threonine-protein kinase
P13716	ALAD	Delta-aminolevulinic acid dehydratase
Q13740	ALCAM	CD166 antigen
Q8IZ83	ALDH16A1	Aldehyde dehydrogenase family 16 member A1
P54886	ALDH18A1	Delta-1-pyrroline-5-carboxylate synthase
P00352	ALDH1A1	Retinal dehydrogenase 1
O94788	ALDH1A2	Retinal dehydrogenase 2
P30837	ALDH1B1	Aldehyde dehydrogenase X, mitochondrial
O75891	ALDH1L1	Cytosolic 10-formyltetrahydrofolate dehydrogenase
Q3SY69	ALDH1L2	Mitochondrial 10-formyltetrahydrofolate dehydrogenase
P05091	ALDH2	Aldehyde dehydrogenase, mitochondrial
P51648	ALDH3A2	Fatty aldehyde dehydrogenase
P30038	ALDH4A1	Delta-1-pyrroline-5-carboxylate dehydrogenase, mitochondrial
P51649	ALDH5A1	Succinate-semialdehyde dehydrogenase, mitochondrial
Q02252	ALDH6A1	Methylmalonate-semialdehyde dehydrogenase [acylating], mitochondrial
P49419	ALDH7A1	Alpha-aminoadipic semialdehyde dehydrogenase
P49189	ALDH9A1	4-trimethylaminobutyraldehyde dehydrogenase
P04075	ALDOA	Fructose-bisphosphate aldolase A
P09972	ALDOC	Fructose-bisphosphate aldolase C
Q92685	ALG3	Dol-P-Man:Man(5)GlcNAc(2)-PP-Dol alpha-1,3-mannosyltransferase
Q96Q83	ALKBH3	Alpha-ketoglutarate-dependent dioxygenase alkB homolog 3
Q9BYJ1	ALOXE3	Hydroperoxide isomerase ALOXE3
P05186	ALPL	Alkaline phosphatase, tissue-nonspecific isozyme
Q86V81	ALYREF	THO complex subunit 4
Q9C0C7	AMBRA1	Activating molecule in BECN1-regulated autophagy protein 1
Q8N7J2	AMER2	APC membrane recruitment protein 2
P03971	AMH	Muellerian-inhibiting factor
Q01433	AMPD2	AMP deaminase 2
P49418	AMPH	Amphiphysin
P48728	AMT	Aminomethyltransferase, mitochondrial
Q9H1A4	ANAPC1	Anaphase-promoting complex subunit 1
Q9UJX3	ANAPC7	Anaphase-promoting complex subunit 7
P16157	ANK1	Ankyrin-1
Q01484	ANK2	Ankyrin-2
Q12955	ANK3	Ankyrin-3
Q9P2R3	ANKFY1	Rabankyrin-5
Q9HCJ1	ANKH	Progressive ankylosis protein homolog
Q8IWZ3	ANKHD1	Ankyrin repeat and KH domain-containing protein 1
Q86XL3	ANKLE2	Ankyrin repeat and LEM domain-containing protein 2
Q8IV38	ANKMY2	Ankyrin repeat and MYND domain-containing protein 2
Q9H9E1	ANKRA2	Ankyrin repeat family A protein 2
O75179	ANKRD17	Ankyrin repeat domain-containing protein 17
O15084	ANKRD28	Serine/threonine-protein phosphatase 6 regulatory ankyrin repeat subunit A
Q7Z6G8	ANKS1B	Ankyrin repeat and sterile alpha motif domain-containing protein 1B
Q9HCE9	ANO8	Anoctamin-8
P39687	ANP32A	Acidic leucine-rich nuclear phosphoprotein 32 family member A
Q92688	ANP32B	Acidic leucine-rich nuclear phosphoprotein 32 family member B
O43423	ANP32C	Acidic leucine-rich nuclear phosphoprotein 32 family member C
Q9BTT0	ANP32E	Acidic leucine-rich nuclear phosphoprotein 32 family member E
P04083	ANXA1	Annexin A1
P50995	ANXA11	Annexin A11
P07355	ANXA2	Annexin A2
A6NMY6	ANXA2P2	Putative annexin A2-like protein
P12429	ANXA3	Annexin A3
P09525	ANXA4	Annexin A4
P08758	ANXA5	Annexin A5
P08133	ANXA6	Annexin A6
P20073	ANXA7	Annexin A7
O76027	ANXA9	Annexin A9
Q16853	AOC3	Membrane primary amine oxidase
Q63HQ0	AP1AR	AP-1 complex-associated regulatory protein
Q10567	AP1B1	AP-1 complex subunit beta-1
O43747	AP1G1	AP-1 complex subunit gamma-1
Q9BXS5	AP1M1	AP-1 complex subunit mu-1
P61966	AP1S1	AP-1 complex subunit sigma-1A
P56377	AP1S2	AP-1 complex subunit sigma-2
O95782	AP2A1	AP-2 complex subunit alpha-1
O94973	AP2A2	AP-2 complex subunit alpha-2
P63010	AP2B1	AP-2 complex subunit beta
Q96CW1	AP2M1	AP-2 complex subunit mu
P53680	AP2S1	AP-2 complex subunit sigma
Q13367	AP3B2	AP-3 complex subunit beta-2
O14617	AP3D1	AP-3 complex subunit delta-1
P53677	AP3M2	AP-3 complex subunit mu-2
Q92572	AP3S1	AP-3 complex subunit sigma-1
Q02410	APBA1	Amyloid beta A4 precursor protein-binding family A member 1
P25054	APC	Adenomatous polyposis coli protein
P13798	APEH	Acylamino-acid-releasing enzyme
P27695	APEX1	DNA-(apurinic or apyrimidinic site) lyase
Q96BI3	APH1A	Gamma-secretase subunit APH-1A
Q9BZZ5	API5	Apoptosis inhibitor 5
Q96GX9	APIP	Methylthioribulose-1-phosphate dehydratase
P51693	APLP1	Amyloid-like protein 1
Q06481	APLP2	Amyloid-like protein 2
Q9HDC9	APMAP	Adipocyte plasma membrane-associated protein
P02647	APOA1	Apolipoprotein A-I
Q8NCW5	APOA1BP	NAD(P)H-hydrate epimerase
P06727	APOA4	Apolipoprotein A-IV
P04114	APOB	Apolipoprotein B-100
P02655	APOC2	Apolipoprotein C-II
P02649	APOE	Apolipoprotein E
Q9BUR5	APOO	MICOS complex subunit MIC26
Q6UXV4	APOOL	MICOS complex subunit MIC27
P05067	APP	Amyloid beta A4 protein
Q9UKG1	APPL1	DCC-interacting protein 13-alpha
Q8NEU8	APPL2	DCC-interacting protein 13-beta
O60306	AQR	Intron-binding protein aquarius
P48444	ARCN1	Coatomer subunit delta
P84077	ARF1	ADP-ribosylation factor 1
P61204	ARF3	ADP-ribosylation factor 3
P18085	ARF4	ADP-ribosylation factor 4
Q8N6T3	ARFGAP1	ADP-ribosylation factor GTPase-activating protein 1
Q8N6H7	ARFGAP2	ADP-ribosylation factor GTPase-activating protein 2
Q9NP61	ARFGAP3	ADP-ribosylation factor GTPase-activating protein 3
Q9Y6D6	ARFGEF1	Brefeldin A-inhibited guanine nucleotide-exchange protein 1
Q9Y6D5	ARFGEF2	Brefeldin A-inhibited guanine nucleotide-exchange protein 2
Q5TH69	ARFGEF3	Brefeldin A-inhibited guanine nucleotide-exchange protein 3
P53367	ARFIP1	Arfaptin-1
P53365	ARFIP2	Arfaptin-2
Q9NWB6	ARGLU1	Arginine and glutamate-rich protein 1
Q07960	ARHGAP1	Rho GTPase-activating protein 1
Q5T5U3	ARHGAP21	Rho GTPase-activating protein 21
Q9P227	ARHGAP23	Rho GTPase-activating protein 23
A7KAX9	ARHGAP32	Rho GTPase-activating protein 32
Q9NRY4	ARHGAP35	Rho GTPase-activating protein 35
Q9C0H5	ARHGAP39	Rho GTPase-activating protein 39
P98171	ARHGAP4	Rho GTPase-activating protein 4
Q17R89	ARHGAP44	Rho GTPase-activating protein 44
Q13017	ARHGAP5	Rho GTPase-activating protein 5
P52565	ARHGDIA	Rho GDP-dissociation inhibitor 1
P52566	ARHGDIB	Rho GDP-dissociation inhibitor 2
Q99819	ARHGDIG	Rho GDP-dissociation inhibitor 3
Q9HCE6	ARHGEF10L	Rho guanine nucleotide exchange factor 10-like protein
Q92974	ARHGEF2	Rho guanine nucleotide exchange factor 2
Q14155	ARHGEF7	Rho guanine nucleotide exchange factor 7
O43307	ARHGEF9	Rho guanine nucleotide exchange factor 9
O14497	ARID1A	AT-rich interactive domain-containing protein 1A
Q8NFD5	ARID1B	AT-rich interactive domain-containing protein 1B
Q68CP9	ARID2	AT-rich interactive domain-containing protein 2
P29374	ARID4A	AT-rich interactive domain-containing protein 4A
Q4LE39	ARID4B	AT-rich interactive domain-containing protein 4B
O95376	ARIH2	E3 ubiquitin-protein ligase ARIH2
P40616	ARL1	ADP-ribosylation factor-like protein 1
Q8N4G2	ARL14	ADP-ribosylation factor-like protein 14
P36404	ARL2	ADP-ribosylation factor-like protein 2
P36405	ARL3	ADP-ribosylation factor-like protein 3
Q15041	ARL6IP1	ADP-ribosylation factor-like protein 6-interacting protein 1
O75915	ARL6IP5	PRA1 family protein 3
Q96BM9	ARL8A	ADP-ribosylation factor-like protein 8A
Q9NVT9	ARMC1	Armadillo repeat-containing protein 1
Q6NXE6	ARMC6	Armadillo repeat-containing protein 6
Q9HBZ2	ARNT2	Aryl hydrocarbon receptor nuclear translocator 2
Q92747	ARPC1A	Actin-related protein 2/3 complex subunit 1A
O15143	ARPC1B	Actin-related protein 2/3 complex subunit 1B
O15144	ARPC2	Actin-related protein 2/3 complex subunit 2
O15145	ARPC3	Actin-related protein 2/3 complex subunit 3
P59998	ARPC4	Actin-related protein 2/3 complex subunit 4
O15511	ARPC5	Actin-related protein 2/3 complex subunit 5
Q9BPX5	ARPC5L	Actin-related protein 2/3 complex subunit 5-like protein
Q7Z6K5	ARPIN	Arpin
P56211	ARPP19	cAMP-regulated phosphoprotein 19
P49407	ARRB1	Beta-arrestin-1
P32121	ARRB2	Beta-arrestin-2
P15289	ARSA	Arylsulfatase A
O00192	ARVCF	Armadillo repeat protein deleted in velo-cardio-facial syndrome
Q13510	ASAH1	Acid ceramidase
Q9ULH1	ASAP1	Arf-GAP with SH3 domain, ANK repeat and PH domain-containing protein 1
Q9H1I8	ASCC2	Activating signal cointegrator 1 complex subunit 2
Q9UBL3	ASH2L	Set1/Ash2 histone methyltransferase complex subunit ASH2
P04424	ASL	Argininosuccinate lyase
O95671	ASMTL	N-acetylserotonin O-methyltransferase-like protein
O43681	ASNA1	ATPase ASNA1
P08243	ASNS	Asparagine synthetase [glutamine-hydrolyzing]
Q86U10	ASPG	60 kDa lysophospholipase
Q12797	ASPH	Aspartyl/asparaginyl beta-hydroxylase
Q9BZE9	ASPSCR1	Tether containing UBX domain for GLUT4
P00966	ASS1	Argininosuccinate synthase
O14525	ASTN1	Astrotactin-1
Q8NBU5	ATAD1	ATPase family AAA domain-containing protein 1
Q6PL18	ATAD2	ATPase family AAA domain-containing protein 2
Q9ULI0	ATAD2B	ATPase family AAA domain-containing protein 2B
Q9NVI7	ATAD3A	ATPase family AAA domain-containing protein 3A
Q5SQI0	ATAT1	Alpha-tubulin N-acetyltransferase 1
P15336	ATF2	Cyclic AMP-dependent transcription factor ATF-2
Q6VMQ6	ATF7IP	Activating transcription factor 7-interacting protein 1
Q9NT62	ATG3	Ubiquitin-like-conjugating enzyme ATG3
Q9Y4P1	ATG4B	Cysteine protease ATG4B
O95352	ATG7	Ubiquitin-like modifier-activating enzyme ATG7
P31939	ATIC	Bifunctional purine biosynthesis protein PURH
Q8WXF7	ATL1	Atlastin-1
Q8NHH9	ATL2	Atlastin-2
Q6DD88	ATL3	Atlastin-3
P54259	ATN1	Atrophin-1
O00244	ATOX1	Copper transport protein ATOX1
P54707	ATP12A	Potassium-transporting ATPase alpha chain 2
Q9HD20	ATP13A1	Manganese-transporting ATPase 13A1
Q9H7F0	ATP13A3	Probable cation-transporting ATPase 13A3
P05023	ATP1A1	Sodium/potassium-transporting ATPase subunit alpha-1
P50993	ATP1A2	Sodium/potassium-transporting ATPase subunit alpha-2
P13637	ATP1A3	Sodium/potassium-transporting ATPase subunit alpha-3
P05026	ATP1B1	Sodium/potassium-transporting ATPase subunit beta-1
P54709	ATP1B3	Sodium/potassium-transporting ATPase subunit beta-3
P16615	ATP2A2	Sarcoplasmic/endoplasmic reticulum calcium ATPase 2
P20020	ATP2B1	Plasma membrane calcium-transporting ATPase 1
Q01814	ATP2B2	Plasma membrane calcium-transporting ATPase 2
Q16720	ATP2B3	Plasma membrane calcium-transporting ATPase 3
P23634	ATP2B4	Plasma membrane calcium-transporting ATPase 4
P25705	ATP5A1	ATP synthase subunit alpha, mitochondrial
P06576	ATP5B	ATP synthase subunit beta, mitochondrial
P36542	ATP5C1	ATP synthase subunit gamma, mitochondrial
P30049	ATP5D	ATP synthase subunit delta, mitochondrial
P56381	ATP5E	ATP synthase subunit epsilon, mitochondrial
P24539	ATP5F1	ATP synthase F(0) complex subunit B1, mitochondrial
O75947	ATP5H	ATP synthase subunit d, mitochondrial
P56385	ATP5I	ATP synthase subunit e, mitochondrial
P18859	ATP5J	ATP synthase-coupling factor 6, mitochondrial
P56134	ATP5J2	ATP synthase subunit f, mitochondrial
O75964	ATP5L	ATP synthase subunit g, mitochondrial
P48047	ATP5O	ATP synthase subunit O, mitochondrial
Q9NW81	ATP5SL	ATP synthase subunit s-like protein
Q15904	ATP6AP1	V-type proton ATPase subunit S1
O75787	ATP6AP2	Renin receptor
Q93050	ATP6V0A1	V-type proton ATPase 116 kDa subunit a isoform 1
P27449	ATP6V0C	V-type proton ATPase 16 kDa proteolipid subunit
P61421	ATP6V0D1	V-type proton ATPase subunit d 1
P38606	ATP6V1A	V-type proton ATPase catalytic subunit A
P21281	ATP6V1B2	V-type proton ATPase subunit B, brain isoform
P21283	ATP6V1C1	V-type proton ATPase subunit C 1
Q9Y5K8	ATP6V1D	V-type proton ATPase subunit D
P36543	ATP6V1E1	V-type proton ATPase subunit E 1
Q16864	ATP6V1F	V-type proton ATPase subunit F
O75348	ATP6V1G1	V-type proton ATPase subunit G 1
O95670	ATP6V1G2	V-type proton ATPase subunit G 2
Q9UI12	ATP6V1H	V-type proton ATPase subunit H
Q9Y2Q0	ATP8A1	Phospholipid-transporting ATPase IA
O75110	ATP9A	Probable phospholipid-transporting ATPase IIA
O43861	ATP9B	Probable phospholipid-transporting ATPase IIB
Q5TC12	ATPAF1	ATP synthase mitochondrial F1 complex assembly factor 1
Q9UII2	ATPIF1	ATPase inhibitor, mitochondrial
O75882	ATRN	Attractin
P46100	ATRX	Transcriptional regulator ATRX
Q9UBB4	ATXN10	Ataxin-10
Q99700	ATXN2	Ataxin-2
Q8WWM7	ATXN2L	Ataxin-2-like protein
P54252	ATXN3	Ataxin-3
Q13825	AUH	Methylglutaconyl-CoA hydratase, mitochondrial
Q9Y679	AUP1	Ancient ubiquitous protein 1
Q9NWT8	AURKAIP1	Aurora kinase A-interacting protein
Q8NBF6	AVL9	Late secretory pathway protein AVL9 homolog
O94766	B3GAT3	Galactosylgalactosylxylosylprotein 3-beta-glucuronosyltransferase 3
Q00973	B4GALNT1	Beta-1,4 N-acetylgalactosaminyltransferase 1
Q9NWV8	BABAM1	BRISC and BRCA1-A complex member 1
Q99933	BAG1	BAG family molecular chaperone regulator 1
Q9UL15	BAG5	BAG family molecular chaperone regulator 5
P46379	BAG6	Large proline-rich protein BAG6
O14514	BAI1	Brain-specific angiogenesis inhibitor 1
Q9UQB8	BAIAP2	Brain-specific angiogenesis inhibitor 1-associated protein 2
O94812	BAIAP3	BAI1-associated protein 3
O75531	BANF1	Barrier-to-autointegration factor
Q92560	BAP1	Ubiquitin carboxyl-terminal hydrolase BAP1
Q8IXM2	BAP18	Chromatin complexes subunit BAP18
P80723	BASP1	Brain acid soluble protein 1
Q07812	BAX	Apoptosis regulator BAX
Q9NRL2	BAZ1A	Bromodomain adjacent to zinc finger domain protein 1A
Q9UIG0	BAZ1B	Tyrosine-protein kinase BAZ1B
Q9UIF8	BAZ2B	Bromodomain adjacent to zinc finger domain protein 2B
P50895	BCAM	Basal cell adhesion molecule
Q96GW7	BCAN	Brevican core protein
Q9UHQ4	BCAP29	B-cell receptor-associated protein 29
P51572	BCAP31	B-cell receptor-associated protein 31
O75815	BCAR3	Breast cancer anti-estrogen resistance protein 3
O75934	BCAS2	Pre-mRNA-splicing factor SPF27
Q9H6U6	BCAS3	Breast carcinoma-amplified sequence 3
P54687	BCAT1	Branched-chain-amino-acid aminotransferase, cytosolic
O15382	BCAT2	Branched-chain-amino-acid aminotransferase, mitochondrial
Q9P287	BCCIP	BRCA2 and CDKN1A-interacting protein
P12694	BCKDHA	2-oxoisovalerate dehydrogenase subunit alpha, mitochondrial
O14874	BCKDK	[3-methyl-2-oxobutanoate dehydrogenase [lipoamide]] kinase, mitochondrial
Q9H165	BCL11A	B-cell lymphoma/leukemia 11A
Q9C0K0	BCL11B	B-cell lymphoma/leukemia 11B
Q9BXK5	BCL2L13	Bcl-2-like protein 13
Q4VC05	BCL7A	B-cell CLL/lymphoma 7 protein family member A
O00512	BCL9	B-cell CLL/lymphoma 9 protein
Q9Y276	BCS1L	Mitochondrial chaperone BCS1
Q02338	BDH1	D-beta-hydroxybutyrate dehydrogenase, mitochondrial
Q9BUT1	BDH2	3-hydroxybutyrate dehydrogenase type 2
Q9BUH8	BEGAIN	Brain-enriched guanylate kinase-associated protein
O15155	BET1	BET1 homolog
Q9NYM9	BET1L	BET1-like protein
P21810	BGN	Biglycan
Q8TD16	BICD2	Protein bicaudal D homolog 2
P55957	BID	BH3-interacting domain death agonist
O00499	BIN1	Myc box-dependent-interacting protein 1
Q9NR09	BIRC6	Baculoviral IAP repeat-containing protein 6
Q13867	BLMH	Bleomycin hydrolase
Q6QNY1	BLOC1S2	Biogenesis of lysosome-related organelles complex 1 subunit 2
P53004	BLVRA	Biliverdin reductase A
P30043	BLVRB	Flavin reductase (NADPH)
Q14692	BMS1	Ribosome biogenesis protein BMS1 homolog
Q96IK1	BOD1	Biorientation of chromosomes in cell division protein 1
Q8NFC6	BOD1L1	Biorientation of chromosomes in cell division protein 1-like 1
Q9Y3E2	BOLA1	BolA-like protein 1
Q53S33	BOLA3	BolA-like protein 3
Q14137	BOP1	Ribosome biogenesis protein BOP1
P07738	BPGM	Bisphosphoglycerate mutase
O95861	BPNT1	3'(2'),5'-bisphosphate nucleotidase 1
Q12830	BPTF	Nucleosome-remodeling factor subunit BPTF
Q7Z569	BRAP	BRCA1-associated protein
P46736	BRCC3	Lys-63-specific deubiquitinase BRCC36
O95696	BRD1	Bromodomain-containing protein 1
P25440	BRD2	Bromodomain-containing protein 2
Q15059	BRD3	Bromodomain-containing protein 3
O60885	BRD4	Bromodomain-containing protein 4
Q9NPI1	BRD7	Bromodomain-containing protein 7
Q9H0E9	BRD8	Bromodomain-containing protein 8
Q9H8M2	BRD9	Bromodomain-containing protein 9
Q9NXR7	BRE	BRCA1-A complex subunit BRE
Q9BX63	BRIP1	Fanconi anemia group J protein
Q8TDN6	BRIX1	Ribosome biogenesis protein BRX1 homolog
Q5PSV4	BRMS1L	Breast cancer metastasis-suppressor 1-like protein
Q8TDC3	BRSK1	Serine/threonine-protein kinase BRSK1
Q8IWQ3	BRSK2	Serine/threonine-protein kinase BRSK2
Q9NW68	BSDC1	BSD domain-containing protein 1
Q9UPA5	BSN	Protein bassoon
O14981	BTAF1	TATA-binding protein-associated factor 172
A6QL63	BTBD11	Ankyrin repeat and BTB/POZ domain-containing protein BTBD11
A6NE02	BTBD17	BTB/POZ domain-containing protein 17
Q5XKL5	BTBD8	BTB/POZ domain-containing protein 8
P20290	BTF3	Transcription factor BTF3
Q96K17	BTF3L4	Transcription factor BTF3 homolog 4
P78410	BTN3A2	Butyrophilin subfamily 3 member A2
O00478	BTN3A3	Butyrophilin subfamily 3 member A3
Q9Y297	BTRC	F-box/WD repeat-containing protein 1A
O43684	BUB3	Mitotic checkpoint protein BUB3
Q9BRD0	BUD13	BUD13 homolog
P41223	BUD31	Protein BUD31 homolog
Q13895	BYSL	Bystin
Q7L1Q6	BZW1	Basic leucine zipper and W2 domain-containing protein 1
Q96B45	C10orf32	UPF0693 protein C10orf32
Q9H3H3	C11orf68	UPF0696 protein C11orf68
Q7Z7L8	C11orf96	Uncharacterized protein C11orf96
Q9HB07	C12orf10	UPF0160 protein MYG1, mitochondrial
Q9NQ89	C12orf4	Protein C12orf4
Q99622	C12orf57	Protein C10
Q9Y224	C14orf166	UPF0568 protein C14orf166
Q96S19	C16orf13	UPF0585 protein C16orf13
Q96MC5	C16orf45	Uncharacterized protein C16orf45
Q53F19	C17orf85	Uncharacterized protein C17orf85
Q96B23	C18orf25	Uncharacterized protein C18orf25
Q8TCD1	C18orf32	UPF0729 protein C18orf32
Q9BQ61	C19orf43	Uncharacterized protein C19orf43
Q86XI8	C19orf68	Uncharacterized protein C19orf68
Q8NDD1	C1orf131	Uncharacterized protein C1orf131
Q9H425	C1orf198	Uncharacterized protein C1orf198
Q8N6N3	C1orf52	UPF0690 protein C1orf52
Q69YW2	C1orf95	Protein stum homolog
Q07021	C1QBP	Complement component 1 Q subcomponent-binding protein, mitochondrial
Q9BUV8	C20orf24	Uncharacterized protein C20orf24
P30042	C21orf33	ES1 protein homolog, mitochondrial
Q8TF44	C2CD4C	C2 calcium-dependent domain-containing protein 4C
Q9BVC5	C2orf49	Ashwin
A6NCS6	C2orf72	Uncharacterized protein C2orf72
P01024	C3	Complement C3
Q9NWY4	C4orf27	UPF0609 protein C4orf27
Q7Z6I8	C5orf24	UPF0461 protein C5orf24
Q86T20	C6orf1	Uncharacterized protein C6orf1
Q8WVR3	C7orf43	Uncharacterized protein C7orf43
Q8NEG2	C7orf57	Uncharacterized protein C7orf57
Q49A92	C8orf34	Uncharacterized protein C8orf34
Q96NL8	C8orf37	Protein C8orf37
Q8N0T1	C8orf59	Uncharacterized protein C8orf59
P02748	C9	Complement component C9
Q9BUH6	C9orf142	Protein PAXX
Q9ULX7	CA14	Carbonic anhydrase 14
P00918	CA2	Carbonic anhydrase 2
Q9H8G2	CAAP1	Caspase activity and apoptosis inhibitor 1
Q9Y376	CAB39	Calcium-binding protein 39
Q9H9S4	CAB39L	Calcium-binding protein 39-like
Q9Y6J0	CABIN1	Calcineurin-binding protein cabin-1
Q5VU97	CACHD1	VWFA and cache domain-containing protein 1
P54289	CACNA2D1	Voltage-dependent calcium channel subunit alpha-2/delta-1
Q9NY47	CACNA2D2	Voltage-dependent calcium channel subunit alpha-2/delta-2
Q8IZS8	CACNA2D3	Voltage-dependent calcium channel subunit alpha-2/delta-3
Q02641	CACNB1	Voltage-dependent L-type calcium channel subunit beta-1
Q08289	CACNB2	Voltage-dependent L-type calcium channel subunit beta-2
P54284	CACNB3	Voltage-dependent L-type calcium channel subunit beta-3
O00305	CACNB4	Voltage-dependent L-type calcium channel subunit beta-4
Q8WXS5	CACNG8	Voltage-dependent calcium channel gamma-8 subunit
Q8WUQ7	CACTIN	Cactin
Q9HB71	CACYBP	Calcyclin-binding protein
P27708	CAD	CAD protein
Q9BY67	CADM1	Cell adhesion molecule 1
Q8N3J6	CADM2	Cell adhesion molecule 2
Q8N126	CADM3	Cell adhesion molecule 3
Q8NFZ8	CADM4	Cell adhesion molecule 4
Q9ULU8	CADPS	Calcium-dependent secretion activator 1
P05937	CALB1	Calbindin
P22676	CALB2	Calretinin
Q05682	CALD1	Caldesmon
P62158	CALM1	Calmodulin
P27797	CALR	Calreticulin
O43852	CALU	Calumenin
Q14012	CAMK1	Calcium/calmodulin-dependent protein kinase type 1
Q8IU85	CAMK1D	Calcium/calmodulin-dependent protein kinase type 1D
Q9UQM7	CAMK2A	Calcium/calmodulin-dependent protein kinase type II subunit alpha
Q13554	CAMK2B	Calcium/calmodulin-dependent protein kinase type II subunit beta
Q13557	CAMK2D	Calcium/calmodulin-dependent protein kinase type II subunit delta
Q13555	CAMK2G	Calcium/calmodulin-dependent protein kinase type II subunit gamma
Q96S95	CAMK2N2	Calcium/calmodulin-dependent protein kinase II inhibitor 2
Q16566	CAMK4	Calcium/calmodulin-dependent protein kinase type IV
Q8N5S9	CAMKK1	Calcium/calmodulin-dependent protein kinase kinase 1
Q96RR4	CAMKK2	Calcium/calmodulin-dependent protein kinase kinase 2
Q8NCB2	CAMKV	CaM kinase-like vesicle-associated protein
P49069	CAMLG	Calcium signal-modulating cyclophilin ligand
Q5T5Y3	CAMSAP1	Calmodulin-regulated spectrin-associated protein 1
Q08AD1	CAMSAP2	Calmodulin-regulated spectrin-associated protein 2
Q9P1Y5	CAMSAP3	Calmodulin-regulated spectrin-associated protein 3
Q86VP6	CAND1	Cullin-associated NEDD8-dissociated protein 1
P27824	CANX	Calnexin
Q01518	CAP1	Adenylyl cyclase-associated protein 1
P40123	CAP2	Adenylyl cyclase-associated protein 2
P07384	CAPN1	Calpain-1 catalytic subunit
O15484	CAPN5	Calpain-5
P04632	CAPNS1	Calpain small subunit 1
Q96L46	CAPNS2	Calpain small subunit 2
Q14444	CAPRIN1	Caprin-1
P52907	CAPZA1	F-actin-capping protein subunit alpha-1
P47755	CAPZA2	F-actin-capping protein subunit alpha-2
P47756	CAPZB	F-actin-capping protein subunit beta
Q8IW45	CARKD	ATP-dependent (S)-NAD(P)H-hydrate dehydratase
Q86X55	CARM1	Histone-arginine methyltransferase CARM1
P49589	CARS	Cysteine--tRNA ligase, cytoplasmic
Q16568	CARTPT	Cocaine- and amphetamine-regulated transcript protein
Q6P4E1	CASC4	Protein CASC4
O14936	CASK	Peripheral plasma membrane protein CASK
Q8WXD9	CASKIN1	Caskin-1
P42574	CASP3	Caspase-3
P55212	CASP6	Caspase-6
P20810	CAST	Calpastatin
P04040	CAT	Catalase
Q13951	CBFB	Core-binding factor subunit beta
P22681	CBL	E3 ubiquitin-protein ligase CBL
Q13191	CBLB	E3 ubiquitin-protein ligase CBL-B
P16152	CBR1	Carbonyl reductase [NADPH] 1
O75828	CBR3	Carbonyl reductase [NADPH] 3
P35520	CBS	Cystathionine beta-synthase
P83916	CBX1	Chromobox protein homolog 1
Q13185	CBX3	Chromobox protein homolog 3
P45973	CBX5	Chromobox protein homolog 5
O95503	CBX6	Chromobox protein homolog 6
Q9HC52	CBX8	Chromobox protein homolog 8
Q6P1N0	CC2D1A	Coiled-coil and C2 domain-containing protein 1A
Q5T0F9	CC2D1B	Coiled-coil and C2 domain-containing protein 1B
Q8IX12	CCAR1	Cell division cycle and apoptosis regulator protein 1
Q96ES7	CCDC101	SAGA-associated factor 29 homolog
Q8WUD4	CCDC12	Coiled-coil domain-containing protein 12
Q96CT7	CCDC124	Coiled-coil domain-containing protein 124
Q96JG6	CCDC132	Syndetin
Q9H6E4	CCDC134	Coiled-coil domain-containing protein 134
Q96JN2	CCDC136	Coiled-coil domain-containing protein 136
Q96M89	CCDC138	Coiled-coil domain-containing protein 138
O60826	CCDC22	Coiled-coil domain-containing protein 22
Q86WR0	CCDC25	Coiled-coil domain-containing protein 25
Q96A33	CCDC47	Coiled-coil domain-containing protein 47
Q16204	CCDC6	Coiled-coil domain-containing protein 6
Q3V6T2	CCDC88A	Girdin
Q9Y3X0	CCDC9	Coiled-coil domain-containing protein 9
Q567U6	CCDC93	Coiled-coil domain-containing protein 93
Q9BW85	CCDC94	Coiled-coil domain-containing protein 94
P06307	CCK	Cholecystokinin
O95067	CCNB2	G2/mitotic-specific cyclin-B2
O95273	CCNDBP1	Cyclin-D1-binding protein 1
O75909	CCNK	Cyclin-K
O60583	CCNT2	Cyclin-T2
Q8ND76	CCNY	Cyclin-Y
Q8N7R7	CCNYL1	Cyclin-Y-like protein 1
P78371	CCT2	T-complex protein 1 subunit beta
P49368	CCT3	T-complex protein 1 subunit gamma
P50991	CCT4	T-complex protein 1 subunit delta
P48643	CCT5	T-complex protein 1 subunit epsilon
P40227	CCT6A	T-complex protein 1 subunit zeta
Q99832	CCT7	T-complex protein 1 subunit eta
P50990	CCT8	T-complex protein 1 subunit theta
P86791	CCZ1	Vacuolar fusion protein CCZ1 homolog
P86790	CCZ1B	Vacuolar fusion protein CCZ1 homolog B
Q9Y5K6	CD2AP	CD2-associated protein
O95400	CD2BP2	CD2 antigen cytoplasmic tail-binding protein 2
P28907	CD38	ADP-ribosyl cyclase/cyclic ADP-ribose hydrolase 1
O15446	CD3EAP	DNA-directed RNA polymerase I subunit RPA34
P08962	CD63	CD63 antigen
P60033	CD81	CD81 antigen
P14209	CD99	CD99 antigen
Q8TCZ2	CD99L2	CD99 antigen-like protein 2
Q13042	CDC16	Cell division cycle protein 16 homolog
Q9UJX2	CDC23	Cell division cycle protein 23 homolog
Q16543	CDC37	Hsp90 co-chaperone Cdc37
O60508	CDC40	Pre-mRNA-processing factor 17
P60953	CDC42	Cell division control protein 42 homolog
Q5VT25	CDC42BPA	Serine/threonine-protein kinase MRCK alpha
Q9Y5S2	CDC42BPB	Serine/threonine-protein kinase MRCK beta
Q9H3Q1	CDC42EP4	Cdc42 effector protein 4
Q9NRR3	CDC42SE2	CDC42 small effector protein 2
Q99459	CDC5L	Cell division cycle 5-like protein
Q6P1J9	CDC73	Parafibromin
Q96GN5	CDCA7L	Cell division cycle-associated 7-like protein
P55287	CDH11	Cadherin-11
P55290	CDH13	Cadherin-13
P19022	CDH2	Cadherin-2
P55285	CDH6	Cadherin-6
P55286	CDH8	Cadherin-8
P06493	CDK1	Cyclin-dependent kinase 1
P21127	CDK11B	Cyclin-dependent kinase 11B
Q9NYV4	CDK12	Cyclin-dependent kinase 12
Q00537	CDK17	Cyclin-dependent kinase 17
Q07002	CDK18	Cyclin-dependent kinase 18
P24941	CDK2	Cyclin-dependent kinase 2
O14519	CDK2AP1	Cyclin-dependent kinase 2-associated protein 1
Q00535	CDK5	Cyclin-dependent-like kinase 5
Q16667	CDKN3	Cyclin-dependent kinase inhibitor 3
O95674	CDS2	Phosphatidate cytidylyltransferase 2
Q9UKY7	CDV3	Protein CDV3 homolog
P31997	CEACAM8	Carcinoembryonic antigen-related cell adhesion molecule 8
Q03701	CEBPZ	CCAAT/enhancer-binding protein zeta
Q92879	CELF1	CUGBP Elav-like family member 1
O95319	CELF2	CUGBP Elav-like family member 2
Q5SZQ8	CELF3	CUGBP Elav-like family member 3
Q9BZC1	CELF4	CUGBP Elav-like family member 4
Q9NYQ7	CELSR3	Cadherin EGF LAG seven-pass G-type receptor 3
Q03188	CENPC	Centromere protein C
Q9BU64	CENPO	Centromere protein O
Q96BT3	CENPT	Centromere protein T
Q7Z7K6	CENPV	Centromere protein V
Q9UPN4	CEP131	Centrosomal protein of 131 kDa
Q5SW79	CEP170	Centrosomal protein of 170 kDa
Q9Y4F5	CEP170B	Centrosomal protein of 170 kDa protein B
Q12798	CETN1	Centrin-1
P41208	CETN2	Centrin-2
Q9Y6A4	CFAP20	Cilia- and flagella-associated protein 20
Q96G28	CFAP36	Cilia- and flagella-associated protein 36
Q9UEE9	CFDP1	Craniofacial development protein 1
P23528	CFL1	Cofilin-1
P27918	CFP	Properdin
P01215	CGA	Glycoprotein hormones alpha chain
Q8WUX2	CHAC2	Putative glutathione-specific gamma-glutamylcyclotransferase 2
Q13112	CHAF1B	Chromatin assembly factor 1 subunit B
Q96JM3	CHAMP1	Chromosome alignment-maintaining phosphoprotein 1
Q96BP2	CHCHD1	Coiled-coil-helix-coiled-coil-helix domain-containing protein 1
Q9Y6H1	CHCHD2	Coiled-coil-helix-coiled-coil-helix domain-containing protein 2
Q9NX63	CHCHD3	MICOS complex subunit MIC19
Q8N4Q1	CHCHD4	Mitochondrial intermembrane space import and assembly protein 40
Q9BRQ6	CHCHD6	MICOS complex subunit MIC25
O14647	CHD2	Chromodomain-helicase-DNA-binding protein 2
Q12873	CHD3	Chromodomain-helicase-DNA-binding protein 3
Q14839	CHD4	Chromodomain-helicase-DNA-binding protein 4
Q8TDI0	CHD5	Chromodomain-helicase-DNA-binding protein 5
Q8TD26	CHD6	Chromodomain-helicase-DNA-binding protein 6
Q9P2D1	CHD7	Chromodomain-helicase-DNA-binding protein 7
Q9HCK8	CHD8	Chromodomain-helicase-DNA-binding protein 8
Q8IWX8	CHERP	Calcium homeostasis endoplasmic reticulum protein
Q96EP1	CHFR	E3 ubiquitin-protein ligase CHFR
P10645	CHGA	Chromogranin-A
P05060	CHGB	Secretogranin-1
P24386	CHM	Rab proteins geranylgeranyltransferase component A 1
O43633	CHMP2A	Charged multivesicular body protein 2a
Q9H444	CHMP4B	Charged multivesicular body protein 4b
Q9NZZ3	CHMP5	Charged multivesicular body protein 5
Q96FZ7	CHMP6	Charged multivesicular body protein 6
Q8WUX9	CHMP7	Charged multivesicular body protein 7
P15882	CHN1	N-chimaerin
Q9NRG0	CHRAC1	Chromatin accessibility complex protein 1
Q8WVB6	CHTF18	Chromosome transmission fidelity protein 18 homolog
Q9Y3Y2	CHTOP	Chromatin target of PRMT1 protein
Q6FI81	CIAPIN1	Anamorsin
Q96RK0	CIC	Protein capicua homolog
Q14011	CIRBP	Cold-inducible RNA-binding protein
Q969X6	CIRH1A	Cirhin
Q9NZ45	CISD1	CDGSH iron-sulfur domain-containing protein 1
O14578	CIT	Citron Rho-interacting kinase
Q9ULV3	CIZ1	Cip1-interacting zinc finger protein
Q07065	CKAP4	Cytoskeleton-associated protein 4
Q14008	CKAP5	Cytoskeleton-associated protein 5
P12277	CKB	Creatine kinase B-type
P06732	CKM	Creatine kinase M-type
P12532	CKMT1A	Creatine kinase U-type, mitochondrial
P17540	CKMT2	Creatine kinase S-type, mitochondrial
Q7Z460	CLASP1	CLIP-associating protein 1
O14967	CLGN	Calmegin
O00299	CLIC1	Chloride intracellular channel protein 1
Q9Y696	CLIC4	Chloride intracellular channel protein 4
Q9NZA1	CLIC5	Chloride intracellular channel protein 5
Q14677	CLINT1	Clathrin interactor 1
P30622	CLIP1	CAP-Gly domain-containing linker protein 1
Q9UDT6	CLIP2	CAP-Gly domain-containing linker protein 2
P54105	CLNS1A	Methylosome subunit pICln
Q16740	CLPP	ATP-dependent Clp protease proteolytic subunit, mitochondrial
O96005	CLPTM1	Cleft lip and palate transmembrane protein 1
O76031	CLPX	ATP-dependent Clp protease ATP-binding subunit clpX-like, mitochondrial
Q9BQT9	CLSTN3	Calsyntenin-3
P09496	CLTA	Clathrin light chain A
P09497	CLTB	Clathrin light chain B
Q00610	CLTC	Clathrin heavy chain 1
P53675	CLTCL1	Clathrin heavy chain 2
O75153	CLUH	Clustered mitochondria protein homolog
Q8IUQ0	CLVS1	Clavesin-1
Q5SYC1	CLVS2	Clavesin-2
Q8N0X4	CLYBL	Citrate lyase subunit beta-like protein, mitochondrial
Q8NFW8	CMAS	N-acylneuraminate cytidylyltransferase
Q96DG6	CMBL	Carboxymethylenebutenolidase homolog
Q7Z7K0	CMC1	COX assembly mitochondrial protein homolog
P30085	CMPK1	UMP-CMP kinase
Q9BQ75	CMSS1	Protein CMSS1
Q96KP4	CNDP2	Cytosolic non-specific dipeptidase
Q6P9H4	CNKSR3	Connector enhancer of kinase suppressor of ras 3
P51911	CNN1	Calponin-1
Q99439	CNN2	Calponin-2
Q15417	CNN3	Calponin-3
A5YKK6	CNOT1	CCR4-NOT transcription complex subunit 1
Q9UKZ1	CNOT11	CCR4-NOT transcription complex subunit 11
Q9NZN8	CNOT2	CCR4-NOT transcription complex subunit 2
O75175	CNOT3	CCR4-NOT transcription complex subunit 3
Q96LI5	CNOT6L	CCR4-NOT transcription complex subunit 6-like
Q9UFF9	CNOT8	CCR4-NOT transcription complex subunit 8
Q3B7I2	CNPY1	Protein canopy homolog 1
Q9Y2B0	CNPY2	Protein canopy homolog 2
Q9BT09	CNPY3	Protein canopy homolog 3
Q96F85	CNRIP1	CB1 cannabinoid receptor-interacting protein 1
Q6PJW8	CNST	Consortin
Q12860	CNTN1	Contactin-1
Q02246	CNTN2	Contactin-2
O94779	CNTN5	Contactin-5
Q9UHC6	CNTNAP2	Contactin-associated protein-like 2
Q9C0A0	CNTNAP4	Contactin-associated protein-like 4
Q9Y2R0	COA3	Cytochrome c oxidase assembly factor 3 homolog, mitochondrial
Q8WTW3	COG1	Conserved oligomeric Golgi complex subunit 1
Q14746	COG2	Conserved oligomeric Golgi complex subunit 2
Q9H9E3	COG4	Conserved oligomeric Golgi complex subunit 4
Q9UP83	COG5	Conserved oligomeric Golgi complex subunit 5
Q9Y2V7	COG6	Conserved oligomeric Golgi complex subunit 6
P83436	COG7	Conserved oligomeric Golgi complex subunit 7
Q96MW5	COG8	Conserved oligomeric Golgi complex subunit 8
P38432	COIL	Coilin
P12107	COL11A1	Collagen alpha-1(XI) chain
P13942	COL11A2	Collagen alpha-2(XI) chain
Q05707	COL14A1	Collagen alpha-1(XIV) chain
P39060	COL18A1	Collagen alpha-1(XVIII) chain
P02452	COL1A1	Collagen alpha-1(I) chain
P08123	COL1A2	Collagen alpha-2(I) chain
Q2UY09	COL28A1	Collagen alpha-1(XXVIII) chain
P02458	COL2A1	Collagen alpha-1(II) chain
P02461	COL3A1	Collagen alpha-1(III) chain
P08572	COL4A2	Collagen alpha-2(IV) chain
P20908	COL5A1	Collagen alpha-1(V) chain
P12109	COL6A1	Collagen alpha-1(VI) chain
P12111	COL6A3	Collagen alpha-3(VI) chain
Q02388	COL7A1	Collagen alpha-1(VII) chain
Q14055	COL9A2	Collagen alpha-2(IX) chain
Q5KU26	COLEC12	Collectin-12
Q8NBJ5	COLGALT1	Procollagen galactosyltransferase 1
Q8N668	COMMD1	COMM domain-containing protein 1
Q7Z4G1	COMMD6	COMM domain-containing protein 6
Q86VX2	COMMD7	COMM domain-containing protein 7
Q9NX08	COMMD8	COMM domain-containing protein 8
Q9P000	COMMD9	COMM domain-containing protein 9
P21964	COMT	Catechol O-methyltransferase
P53621	COPA	Coatomer subunit alpha
P53618	COPB1	Coatomer subunit beta
P35606	COPB2	Coatomer subunit beta'
O14579	COPE	Coatomer subunit epsilon
Q9Y678	COPG1	Coatomer subunit gamma-1
Q9UBF2	COPG2	Coatomer subunit gamma-2
P61201	COPS2	COP9 signalosome complex subunit 2
Q9UNS2	COPS3	COP9 signalosome complex subunit 3
Q9BT78	COPS4	COP9 signalosome complex subunit 4
Q92905	COPS5	COP9 signalosome complex subunit 5
Q7L5N1	COPS6	COP9 signalosome complex subunit 6
Q9H9Q2	COPS7B	COP9 signalosome complex subunit 7b
Q99627	COPS8	COP9 signalosome complex subunit 8
P61923	COPZ1	Coatomer subunit zeta-1
Q9NZJ6	COQ3	Ubiquinone biosynthesis O-methyltransferase, mitochondrial
Q5HYK3	COQ5	2-methoxy-6-polyprenyl-1,4-benzoquinol methylase, mitochondrial
Q9Y2Z9	COQ6	Ubiquinone biosynthesis monooxygenase COQ6, mitochondrial
O75208	COQ9	Ubiquinone biosynthesis protein COQ9, mitochondrial
Q9ULV4	CORO1C	Coronin-1C
P57737	CORO7	Coronin-7
Q14019	COTL1	Coactosin-like protein
Q7KZN9	COX15	Cytochrome c oxidase assembly protein COX15 homolog
Q9P0S2	COX16	Cytochrome c oxidase assembly protein COX16 homolog, mitochondrial
P13073	COX4I1	Cytochrome c oxidase subunit 4 isoform 1, mitochondrial
Q96KJ9	COX4I2	Cytochrome c oxidase subunit 4 isoform 2, mitochondrial
P20674	COX5A	Cytochrome c oxidase subunit 5A, mitochondrial
P10606	COX5B	Cytochrome c oxidase subunit 5B, mitochondrial
P12074	COX6A1	Cytochrome c oxidase subunit 6A1, mitochondrial
P14854	COX6B1	Cytochrome c oxidase subunit 6B1
P09669	COX6C	Cytochrome c oxidase subunit 6C
P14406	COX7A2	Cytochrome c oxidase subunit 7A2, mitochondrial
O14548	COX7A2L	Cytochrome c oxidase subunit 7A-related protein, mitochondrial
O75976	CPD	Carboxypeptidase D
P16870	CPE	Carboxypeptidase E
Q7Z5Q1	CPEB2	Cytoplasmic polyadenylation element-binding protein 2
Q17RY0	CPEB4	Cytoplasmic polyadenylation element-binding protein 4
O14810	CPLX1	Complexin-1
Q6PUV4	CPLX2	Complexin-2
Q99829	CPNE1	Copine-1
Q96FN4	CPNE2	Copine-2
O75131	CPNE3	Copine-3
Q96A23	CPNE4	Copine-4
Q9HCH3	CPNE5	Copine-5
Q9UBL6	CPNE7	Copine-7
Q86YQ8	CPNE8	Copine-8
Q8IYJ1	CPNE9	Copine-9
P36551	CPOX	Oxygen-dependent coproporphyrinogen-III oxidase, mitochondrial
Q9Y646	CPQ	Carboxypeptidase Q
Q10570	CPSF1	Cleavage and polyadenylation specificity factor subunit 1
Q9P2I0	CPSF2	Cleavage and polyadenylation specificity factor subunit 2
Q16630	CPSF6	Cleavage and polyadenylation specificity factor subunit 6
Q8N684	CPSF7	Cleavage and polyadenylation specificity factor subunit 7
P50416	CPT1A	Carnitine O-palmitoyltransferase 1, liver isoform
P23786	CPT2	Carnitine O-palmitoyltransferase 2, mitochondrial
Q9H3G5	CPVL	Probable serine carboxypeptidase CPVL
P16220	CREB1	Cyclic AMP-responsive element-binding protein 1
Q92793	CREBBP	CREB-binding protein
Q96HD1	CRELD1	Cysteine-rich with EGF-like domain protein 1
P06850	CRH	Corticoliberin
P52943	CRIP2	Cysteine-rich protein 2
P46108	CRK	Adapter molecule crk
P46109	CRKL	Crk-like protein
Q14194	CRMP1	Dihydropyrimidinase-related protein 1
Q9BZJ0	CRNKL1	Crooked neck-like protein 1
Q5TZA2	CROCC	Rootletin
P02741	CRP	C-reactive protein
Q9NQ79	CRTAC1	Cartilage acidic protein 1
Q6UUV9	CRTC1	CREB-regulated transcription coactivator 1
Q9Y2S2	CRYL1	Lambda-crystallin homolog
Q14894	CRYM	Ketimine reductase mu-crystallin
Q08257	CRYZ	Quinone oxidoreductase
O95825	CRYZL1	Quinone oxidoreductase-like protein 1
O75390	CS	Citrate synthase, mitochondrial
Q9Y534	CSDC2	Cold shock domain-containing protein C2
O75534	CSDE1	Cold shock domain-containing protein E1
P55060	CSE1L	Exportin-2
P41240	CSK	Tyrosine-protein kinase CSK
P47710	CSN1S1	Alpha-S1-casein
P07498	CSN3	Kappa-casein
P48729	CSNK1A1	Casein kinase I isoform alpha
P48730	CSNK1D	Casein kinase I isoform delta
P49674	CSNK1E	Casein kinase I isoform epsilon
P78368	CSNK1G2	Casein kinase I isoform gamma-2
Q9Y6M4	CSNK1G3	Casein kinase I isoform gamma-3
P68400	CSNK2A1	Casein kinase II subunit alpha
P19784	CSNK2A2	Casein kinase II subunit alpha'
P67870	CSNK2B	Casein kinase II subunit beta
O95196	CSPG5	Chondroitin sulfate proteoglycan 5
Q8WYN3	CSRNP3	Cysteine/serine-rich nuclear protein 3
Q16527	CSRP2	Cysteine and glycine-rich protein 2
Q9H8E8	CSRP2BP	Cysteine-rich protein 2-binding protein
P01034	CST3	Cystatin-C
P04080	CSTB	Cystatin-B
Q05048	CSTF1	Cleavage stimulation factor subunit 1
P33240	CSTF2	Cleavage stimulation factor subunit 2
Q12996	CSTF3	Cleavage stimulation factor subunit 3
O15320	CTAGE5	cTAGE family member 5
Q13363	CTBP1	C-terminal-binding protein 1
P56545	CTBP2	C-terminal-binding protein 2
Q01459	CTBS	Di-N-acetylchitobiase
P49711	CTCF	Transcriptional repressor CTCF
Q9Y5B0	CTDP1	RNA polymerase II subunit A C-terminal domain phosphatase
O14595	CTDSP2	Carboxy-terminal domain RNA polymerase II polypeptide A small phosphatase 2
Q05D32	CTDSPL2	CTD small phosphatase-like protein 2
P32929	CTH	Cystathionine gamma-lyase
P35221	CTNNA1	Catenin alpha-1
P26232	CTNNA2	Catenin alpha-2
P35222	CTNNB1	Catenin beta-1
Q9NSA3	CTNNBIP1	Beta-catenin-interacting protein 1
Q8WYA6	CTNNBL1	Beta-catenin-like protein 1
O60716	CTNND1	Catenin delta-1
Q9UQB3	CTNND2	Catenin delta-2
P17812	CTPS1	CTP synthase 1
Q6PD62	CTR9	RNA polymerase-associated protein CTR9 homolog
P10619	CTSA	Lysosomal protective protein
P07858	CTSB	Cathepsin B
P53634	CTSC	Dipeptidyl peptidase 1
P07339	CTSD	Cathepsin D
Q9UBX1	CTSF	Cathepsin F
O60911	CTSV	Cathepsin L2
Q14247	CTTN	Src substrate cortactin
Q8WZ74	CTTNBP2	Cortactin-binding protein 2
Q2VPK5	CTU2	Cytoplasmic tRNA 2-thiolation protein 2
Q13616	CUL1	Cullin-1
Q13617	CUL2	Cullin-2
Q13618	CUL3	Cullin-3
Q13620	CUL4B	Cullin-4B
Q93034	CUL5	Cullin-5
Q8IWT3	CUL9	Cullin-9
P39880	CUX1	Homeobox protein cut-like 1
Q9P013	CWC15	Spliceosome-associated protein CWC15 homolog
Q9HCG8	CWC22	Pre-mRNA-splicing factor CWC22 homolog
Q9NXE8	CWC25	Pre-mRNA-splicing factor CWC25 homolog
Q6UX04	CWC27	Peptidyl-prolyl cis-trans isomerase CWC27 homolog
Q69YN2	CWF19L1	CWF19-like protein 1
Q2TBE0	CWF19L2	CWF19-like protein 2
P78310	CXADR	Coxsackievirus and adenovirus receptor
Q6NSI4	CXorf57	Uncharacterized protein CXorf57
Q9P0U4	CXXC1	CXXC-type zinc finger protein 1
P00167	CYB5A	Cytochrome b5
O43169	CYB5B	Cytochrome b5 type B
Q6BCY4	CYB5R2	NADH-cytochrome b5 reductase 2
P00387	CYB5R3	NADH-cytochrome b5 reductase 3
P04839	CYBB	Cytochrome b-245 heavy chain
P08574	CYC1	Cytochrome c1, heme protein, mitochondrial
P99999	CYCS	Cytochrome c
Q7L576	CYFIP1	Cytoplasmic FMR1-interacting protein 1
Q96F07	CYFIP2	Cytoplasmic FMR1-interacting protein 2
Q8WWM9	CYGB	Cytoglobin
Q9NQC7	CYLD	Ubiquitin carboxyl-terminal hydrolase CYLD
Q6UW02	CYP20A1	Cytochrome P450 20A1
Q02318	CYP27A1	Sterol 26-hydroxylase, mitochondrial
Q4G0S4	CYP27C1	Cytochrome P450 27C1
Q16696	CYP2A13	Cytochrome P450 2A13
P10632	CYP2C8	Cytochrome P450 2C8
Q9NYL5	CYP39A1	24-hydroxycholesterol 7-alpha-hydroxylase
Q16850	CYP51A1	Lanosterol 14-alpha demethylase
Q9H1C7	CYSTM1	Cysteine-rich and transmembrane domain-containing protein 1
Q15438	CYTH1	Cytohesin-1
Q99418	CYTH2	Cytohesin-2
Q9Y4D1	DAAM1	Disheveled-associated activator of morphogenesis 1
P98082	DAB2	Disabled homolog 2
Q5VWQ8	DAB2IP	Disabled homolog 2-interacting protein
Q9UI36	DACH1	Dachshund homolog 1
P61803	DAD1	Dolichyl-diphosphooligosaccharide--protein glycosyltransferase subunit DAD1
Q14118	DAG1	Dystroglycan
Q8NCG7	DAGLB	Sn1-specific diacylglycerol lipase beta
Q3LXA3	DAK	Bifunctional ATP-dependent dihydroxyacetone kinase/FAD-AMP lyase (cyclizing)
Q8N907	DAND5	DAN domain family member 5
P51397	DAP	Death-associated protein 1
P51398	DAP3	28S ribosomal protein S29, mitochondrial
Q9UIK4	DAPK2	Death-associated protein kinase 2
A0PJW8	DAPL1	Death-associated protein-like 1
P14868	DARS	Aspartate--tRNA ligase, cytoplasmic
Q9UER7	DAXX	Death domain-associated protein 6
Q96EP5	DAZAP1	DAZ-associated protein 1
P07108	DBI	Acyl-CoA-binding protein
Q16643	DBN1	Drebrin
Q9UJU6	DBNL	Drebrin-like protein
Q9UK59	DBR1	Lariat debranching enzyme
P11182	DBT	Lipoamide acyltransferase component of branched-chain alpha-keto acid dehydrogenase complex, mitochondrial
Q9NV06	DCAF13	DDB1- and CUL4-associated factor 13
P61962	DCAF7	DDB1- and CUL4-associated factor 7
P43146	DCC	Netrin receptor DCC
Q96JQ0	DCHS1	Protocadherin-16
O15075	DCLK1	Serine/threonine-protein kinase DCLK1
Q8N568	DCLK2	Serine/threonine-protein kinase DCLK2
P07585	DCN	Decorin
Q9NPI6	DCP1A	mRNA-decapping enzyme 1A
Q8IZD4	DCP1B	mRNA-decapping enzyme 1B
Q96C86	DCPS	m7GpppX diphosphatase
Q14203	DCTN1	Dynactin subunit 1
Q13561	DCTN2	Dynactin subunit 2
O75935	DCTN3	Dynactin subunit 3
Q9UJW0	DCTN4	Dynactin subunit 4
O00399	DCTN6	Dynactin subunit 6
Q96GG9	DCUN1D1	DCN1-like protein 1
O43602	DCX	Neuronal migration protein doublecortin
Q7Z4W1	DCXR	L-xylulose reductase
Q9BW61	DDA1	DET1- and DDB1-associated protein 1
O94760	DDAH1	N(G),N(G)-dimethylarginine dimethylaminohydrolase 1
Q16531	DDB1	DNA damage-binding protein 1
P20711	DDC	Aromatic-L-amino-acid decarboxylase
Q5TDH0	DDI2	Protein DDI1 homolog 2
P39656	DDOST	Dolichyl-diphosphooligosaccharide--protein glycosyltransferase 48 kDa subunit
Q16832	DDR2	Discoidin domain-containing receptor 2
P30046	DDT	D-dopachrome decarboxylase
Q92499	DDX1	ATP-dependent RNA helicase DDX1
Q13206	DDX10	Probable ATP-dependent RNA helicase DDX10
Q92841	DDX17	Probable ATP-dependent RNA helicase DDX17
Q9NVP1	DDX18	ATP-dependent RNA helicase DDX18
Q9NUU7	DDX19A	ATP-dependent RNA helicase DDX19A
Q9UMR2	DDX19B	ATP-dependent RNA helicase DDX19B
Q9UHI6	DDX20	Probable ATP-dependent RNA helicase DDX20
Q9NR30	DDX21	Nucleolar RNA helicase 2
Q9BUQ8	DDX23	Probable ATP-dependent RNA helicase DDX23
Q9GZR7	DDX24	ATP-dependent RNA helicase DDX24
Q96GQ7	DDX27	Probable ATP-dependent RNA helicase DDX27
Q9H8H2	DDX31	Probable ATP-dependent RNA helicase DDX31
O00148	DDX39A	ATP-dependent RNA helicase DDX39A
Q13838	DDX39B	Spliceosome RNA helicase DDX39B
O00571	DDX3X	ATP-dependent RNA helicase DDX3X
Q86XP3	DDX42	ATP-dependent RNA helicase DDX42
Q7L014	DDX46	Probable ATP-dependent RNA helicase DDX46
P17844	DDX5	Probable ATP-dependent RNA helicase DDX5
Q8N8A6	DDX51	ATP-dependent RNA helicase DDX51
Q8TDD1	DDX54	ATP-dependent RNA helicase DDX54
Q8NHQ9	DDX55	ATP-dependent RNA helicase DDX55
Q9NY93	DDX56	Probable ATP-dependent RNA helicase DDX56
P26196	DDX6	Probable ATP-dependent RNA helicase DDX6
Q16698	DECR1	2,4-dienoyl-CoA reductase, mitochondrial
Q9NUI1	DECR2	Peroxisomal 2,4-dienoyl-CoA reductase
O15121	DEGS1	Sphingolipid delta(4)-desaturase DES1
P35659	DEK	Protein DEK
Q8TEH3	DENND1A	DENN domain-containing protein 1A
O43583	DENR	Density-regulated protein
Q9Y315	DERA	Deoxyribose-phosphate aldolase
Q9BUN8	DERL1	Derlin-1
Q6ICB0	DESI1	Desumoylating isopeptidase 1
O00273	DFFA	DNA fragmentation factor subunit alpha
Q96DF8	DGCR14	Protein DGCR14
Q8WYQ5	DGCR8	Microprocessor complex subunit DGCR8
Q9Y6T7	DGKB	Diacylglycerol kinase beta
P52429	DGKE	Diacylglycerol kinase epsilon
Q15392	DHCR24	Delta(24)-sterol reductase
Q9UBM7	DHCR7	7-dehydrocholesterol reductase
P00374	DHFR	Dihydrofolate reductase
Q02127	DHODH	Dihydroorotate dehydrogenase (quinone), mitochondrial
P49366	DHPS	Deoxyhypusine synthase
Q6UWP2	DHRS11	Dehydrogenase/reductase SDR family member 11
A0PJE2	DHRS12	Dehydrogenase/reductase SDR family member 12
Q6UX07	DHRS13	Dehydrogenase/reductase SDR family member 13
Q6IAN0	DHRS7B	Dehydrogenase/reductase SDR family member 7B
Q96HY7	DHTKD1	Probable 2-oxoglutarate dehydrogenase E1 component DHKTD1, mitochondrial
O43143	DHX15	Pre-mRNA-splicing factor ATP-dependent RNA helicase DHX15
Q7Z478	DHX29	ATP-dependent RNA helicase DHX29
Q92620	DHX38	Pre-mRNA-splicing factor ATP-dependent RNA helicase PRP16
Q14562	DHX8	ATP-dependent RNA helicase DHX8
Q08211	DHX9	ATP-dependent RNA helicase A
Q9NR28	DIABLO	Diablo homolog, mitochondrial
O60610	DIAPH1	Protein diaphanous homolog 1
Q9UPY3	DICER1	Endoribonuclease Dicer
Q9BTC0	DIDO1	Death-inducer obliterator 1
Q14689	DIP2A	Disco-interacting protein 2 homolog A
Q9P265	DIP2B	Disco-interacting protein 2 homolog B
Q9Y2E4	DIP2C	Disco-interacting protein 2 homolog C
O95057	DIRAS1	GTP-binding protein Di-Ras1
Q96HU8	DIRAS2	GTP-binding protein Di-Ras2
Q9Y2L1	DIS3	Exosome complex exonuclease RRP44
Q8IYB7	DIS3L2	DIS3-like exonuclease 2
O60832	DKC1	H/ACA ribonucleoprotein complex subunit 4
P10515	DLAT	Dihydrolipoyllysine-residue acetyltransferase component of pyruvate dehydrogenase complex, mitochondrial
P09622	DLD	Dihydrolipoyl dehydrogenase, mitochondrial
Q12959	DLG1	Disks large homolog 1
Q15700	DLG2	Disks large homolog 2
Q92796	DLG3	Disks large homolog 3
P78352	DLG4	Disks large homolog 4
O14490	DLGAP1	Disks large-associated protein 1
O95886	DLGAP3	Disks large-associated protein 3
Q9Y2H0	DLGAP4	Disks large-associated protein 4
P36957	DLST	Dihydrolipoyllysine-residue succinyltransferase component of 2-oxoglutarate dehydrogenase complex, mitochondrial
Q9NPF5	DMAP1	DNA methyltransferase 1-associated protein 1
Q08495	DMTN	Dematin
Q9Y485	DMXL1	DmX-like protein 1
Q8TDJ6	DMXL2	DmX-like protein 2
Q9NYC9	DNAH9	Dynein heavy chain 9, axonemal
P31689	DNAJA1	DnaJ homolog subfamily A member 1
O60884	DNAJA2	DnaJ homolog subfamily A member 2
Q96EY1	DNAJA3	DnaJ homolog subfamily A member 3, mitochondrial
Q8WW22	DNAJA4	DnaJ homolog subfamily A member 4
P25685	DNAJB1	DnaJ homolog subfamily B member 1
Q9UBS4	DNAJB11	DnaJ homolog subfamily B member 11
Q9NXW2	DNAJB12	DnaJ homolog subfamily B member 12
Q8TBM8	DNAJB14	DnaJ homolog subfamily B member 14
O75953	DNAJB5	DnaJ homolog subfamily B member 5
O75190	DNAJB6	DnaJ homolog subfamily B member 6
Q7Z6W7	DNAJB7	DnaJ homolog subfamily B member 7
Q8IXB1	DNAJC10	DnaJ homolog subfamily C member 10
O75165	DNAJC13	DnaJ homolog subfamily C member 13
Q9NVM6	DNAJC17	DnaJ homolog subfamily C member 17
Q99543	DNAJC2	DnaJ homolog subfamily C member 2
Q13217	DNAJC3	DnaJ homolog subfamily C member 3
Q9H3Z4	DNAJC5	DnaJ homolog subfamily C member 5
Q8N7S2	DNAJC5G	DnaJ homolog subfamily C member 5G
O75061	DNAJC6	Putative tyrosine-protein phosphatase auxilin
Q99615	DNAJC7	DnaJ homolog subfamily C member 7
O75937	DNAJC8	DnaJ homolog subfamily C member 8
Q8WXX5	DNAJC9	DnaJ homolog subfamily C member 9
Q4LDG9	DNAL1	Dynein light chain 1, axonemal
Q8NFT8	DNER	Delta and Notch-like epidermal growth factor-related receptor
Q05193	DNM1	Dynamin-1
O00429	DNM1L	Dynamin-1-like protein
P50570	DNM2	Dynamin-2
Q9UQ16	DNM3	Dynamin-3
P26358	DNMT1	DNA (cytosine-5)-methyltransferase 1
Q9Y6K1	DNMT3A	DNA (cytosine-5)-methyltransferase 3A
Q9ULA0	DNPEP	Aspartyl aminopeptidase
O43598	DNPH1	2'-deoxynucleoside 5'-phosphate N-hydrolase 1
Q14185	DOCK1	Dedicator of cytokinesis protein 1
Q96BY6	DOCK10	Dedicator of cytokinesis protein 10
Q8N1I0	DOCK4	Dedicator of cytokinesis protein 4
Q96N67	DOCK7	Dedicator of cytokinesis protein 7
Q9BZ29	DOCK9	Dedicator of cytokinesis protein 9
Q9BU89	DOHH	Deoxyhypusine hydroxylase
Q9Y3R5	DOPEY2	Protein dopey-2
Q92782	DPF1	Zinc finger protein neuro-d4
Q92785	DPF2	Zinc finger protein ubi-d4
Q9BQC3	DPH2	Diphthamide biosynthesis protein 2
Q9H2P9	DPH5	Diphthine methyl ester synthase
O60762	DPM1	Dolichol-phosphate mannosyltransferase subunit 1
Q8N608	DPP10	Inactive dipeptidyl peptidase 10
Q9NY33	DPP3	Dipeptidyl peptidase 3
P42658	DPP6	Dipeptidyl aminopeptidase-like protein 6
Q6V1X1	DPP8	Dipeptidyl peptidase 8
Q86TI2	DPP9	Dipeptidyl peptidase 9
Q9C005	DPY30	Protein dpy-30 homolog
Q16555	DPYSL2	Dihydropyrimidinase-related protein 2
Q14195	DPYSL3	Dihydropyrimidinase-related protein 3
O14531	DPYSL4	Dihydropyrimidinase-related protein 4
Q9BPU6	DPYSL5	Dihydropyrimidinase-related protein 5
Q01658	DR1	Protein Dr1
Q14919	DRAP1	Dr1-associated corepressor
Q9Y295	DRG1	Developmentally-regulated GTP-binding protein 1
P55039	DRG2	Developmentally-regulated GTP-binding protein 2
P15924	DSP	Desmoplakin
Q03001	DST	Dystonin
Q9Y4J8	DTNA	Dystrobrevin alpha
Q8N9I9	DTX3	Probable E3 ubiquitin-protein ligase DTX3
P23919	DTYMK	Thymidylate kinase
Q96G46	DUS3L	tRNA-dihydrouridine(47) synthase [NAD(P)(+)]-like
O75319	DUSP11	RNA/RNP complex-1-interacting phosphatase
P33316	DUT	Deoxyuridine 5'-triphosphate nucleotidohydrolase, mitochondrial
O14640	DVL1	Segment polarity protein dishevelled homolog DVL-1
P54792	DVL1P1	Putative segment polarity protein dishevelled homolog DVL1P1
O14641	DVL2	Segment polarity protein dishevelled homolog DVL-2
Q92997	DVL3	Segment polarity protein dishevelled homolog DVL-3
Q14204	DYNC1H1	Cytoplasmic dynein 1 heavy chain 1
Q13409	DYNC1I2	Cytoplasmic dynein 1 intermediate chain 2
Q9Y6G9	DYNC1LI1	Cytoplasmic dynein 1 light intermediate chain 1
O43237	DYNC1LI2	Cytoplasmic dynein 1 light intermediate chain 2
Q8TCX1	DYNC2LI1	Cytoplasmic dynein 2 light intermediate chain 1
P63167	DYNLL1	Dynein light chain 1, cytoplasmic
Q96FJ2	DYNLL2	Dynein light chain 2, cytoplasmic
Q9NP97	DYNLRB1	Dynein light chain roadblock-type 1
Q8TF09	DYNLRB2	Dynein light chain roadblock-type 2
P63172	DYNLT1	Dynein light chain Tctex-type 1
Q13627	DYRK1A	Dual specificity tyrosine-phosphorylation-regulated kinase 1A
Q16254	E2F4	Transcription factor E2F4
Q15329	E2F5	Transcription factor E2F5
Q66K89	E4F1	Transcription factor E4F1
O00559	EBAG9	Receptor-binding cancer antigen expressed on SiSo cells
Q9UH73	EBF1	Transcription factor COE1
Q9HAK2	EBF2	Transcription factor COE2
Q9H4W6	EBF3	Transcription factor COE3
Q9BQW3	EBF4	Transcription factor COE4
Q99848	EBNA1BP2	Probable rRNA-processing protein EBP2
O95905	ECD	Protein ecdysoneless homolog
P42892	ECE1	Endothelin-converting enzyme 1
O60344	ECE2	Endothelin-converting enzyme 2
Q13011	ECH1	Delta(3,5)-Delta(2,4)-dienoyl-CoA isomerase, mitochondrial
Q9NTX5	ECHDC1	Ethylmalonyl-CoA decarboxylase
P30084	ECHS1	Enoyl-CoA hydratase, mitochondrial
P42126	ECI1	Enoyl-CoA delta isomerase 1, mitochondrial
O75521	ECI2	Enoyl-CoA delta isomerase 2, mitochondrial
Q5VYK3	ECM29	Proteasome-associated protein ECM29 homolog
Q96F86	EDC3	Enhancer of mRNA-decapping protein 3
Q6P2E9	EDC4	Enhancer of mRNA-decapping protein 4
O60869	EDF1	Endothelial differentiation-related factor 1
O43854	EDIL3	EGF-like repeat and discoidin I-like domain-containing protein 3
Q15075	EEA1	Early endosome antigen 1
P68104	EEF1A1	Elongation factor 1-alpha 1
Q05639	EEF1A2	Elongation factor 1-alpha 2
P24534	EEF1B2	Elongation factor 1-beta
P29692	EEF1D	Elongation factor 1-delta
O43324	EEF1E1	Eukaryotic translation elongation factor 1 epsilon-1
P26641	EEF1G	Elongation factor 1-gamma
P13639	EEF2	Elongation factor 2
Q5THR3	EFCAB6	EF-hand calcium-binding domain-containing protein 6
Q9BUP0	EFHD1	EF-hand domain-containing protein D1
Q96C19	EFHD2	EF-hand domain-containing protein D2
P98172	EFNB1	Ephrin-B1
Q9Y2G0	EFR3B	Protein EFR3 homolog B
Q15029	EFTUD2	116 kDa U5 small nuclear ribonucleoprotein component
Q8NDI1	EHBP1	EH domain-binding protein 1
Q9H4M9	EHD1	EH domain-containing protein 1
Q9NZN3	EHD3	EH domain-containing protein 3
Q9H223	EHD4	EH domain-containing protein 4
Q9H9B1	EHMT1	Histone-lysine N-methyltransferase EHMT1
Q96KQ7	EHMT2	Histone-lysine N-methyltransferase EHMT2
P47813	EIF1AX	Eukaryotic translation initiation factor 1A, X-chromosomal
O60739	EIF1B	Eukaryotic translation initiation factor 1b
Q9BY44	EIF2A	Eukaryotic translation initiation factor 2A
Q14232	EIF2B1	Translation initiation factor eIF-2B subunit alpha
P49770	EIF2B2	Translation initiation factor eIF-2B subunit beta
Q9NR50	EIF2B3	Translation initiation factor eIF-2B subunit gamma
Q9UI10	EIF2B4	Translation initiation factor eIF-2B subunit delta
Q13144	EIF2B5	Translation initiation factor eIF-2B subunit epsilon
P41214	EIF2D	Eukaryotic translation initiation factor 2D
P05198	EIF2S1	Eukaryotic translation initiation factor 2 subunit 1
P20042	EIF2S2	Eukaryotic translation initiation factor 2 subunit 2
P41091	EIF2S3	Eukaryotic translation initiation factor 2 subunit 3
Q14152	EIF3A	Eukaryotic translation initiation factor 3 subunit A
P55884	EIF3B	Eukaryotic translation initiation factor 3 subunit B
Q99613	EIF3C	Eukaryotic translation initiation factor 3 subunit C
O15371	EIF3D	Eukaryotic translation initiation factor 3 subunit D
P60228	EIF3E	Eukaryotic translation initiation factor 3 subunit E
O00303	EIF3F	Eukaryotic translation initiation factor 3 subunit F
O75821	EIF3G	Eukaryotic translation initiation factor 3 subunit G
O15372	EIF3H	Eukaryotic translation initiation factor 3 subunit H
Q13347	EIF3I	Eukaryotic translation initiation factor 3 subunit I
O75822	EIF3J	Eukaryotic translation initiation factor 3 subunit J
Q9UBQ5	EIF3K	Eukaryotic translation initiation factor 3 subunit K
Q9Y262	EIF3L	Eukaryotic translation initiation factor 3 subunit L
Q7L2H7	EIF3M	Eukaryotic translation initiation factor 3 subunit M
P60842	EIF4A1	Eukaryotic initiation factor 4A-I
Q14240	EIF4A2	Eukaryotic initiation factor 4A-II
P38919	EIF4A3	Eukaryotic initiation factor 4A-III
P23588	EIF4B	Eukaryotic translation initiation factor 4B
P06730	EIF4E	Eukaryotic translation initiation factor 4E
A6NMX2	EIF4E1B	Eukaryotic translation initiation factor 4E type 1B
Q13542	EIF4EBP2	Eukaryotic translation initiation factor 4E-binding protein 2
Q9NRA8	EIF4ENIF1	Eukaryotic translation initiation factor 4E transporter
Q04637	EIF4G1	Eukaryotic translation initiation factor 4 gamma 1
P78344	EIF4G2	Eukaryotic translation initiation factor 4 gamma 2
O43432	EIF4G3	Eukaryotic translation initiation factor 4 gamma 3
Q15056	EIF4H	Eukaryotic translation initiation factor 4H
P55010	EIF5	Eukaryotic translation initiation factor 5
P63241	EIF5A	Eukaryotic translation initiation factor 5A-1
O60841	EIF5B	Eukaryotic translation initiation factor 5B
Q15717	ELAVL1	ELAV-like protein 1
Q12926	ELAVL2	ELAV-like protein 2
Q14576	ELAVL3	ELAV-like protein 3
P26378	ELAVL4	ELAV-like protein 4
Q15723	ELF2	ETS-related transcription factor Elf-2
P0C7U0	ELFN1	Protein ELFN1
P28324	ELK4	ETS domain-containing protein Elk-4
Q92556	ELMO1	Engulfment and cell motility protein 1
Q96JJ3	ELMO2	Engulfment and cell motility protein 2
Q9BW60	ELOVL1	Elongation of very long chain fatty acids protein 1
Q9NXB9	ELOVL2	Elongation of very long chain fatty acids protein 2
Q9GZR5	ELOVL4	Elongation of very long chain fatty acids protein 4
Q9NYP7	ELOVL5	Elongation of very long chain fatty acids protein 5
Q6IA86	ELP2	Elongator complex protein 2
Q8N766	EMC1	ER membrane protein complex subunit 1
Q5UCC4	EMC10	ER membrane protein complex subunit 10
Q15006	EMC2	ER membrane protein complex subunit 2
Q9P0I2	EMC3	ER membrane protein complex subunit 3
Q5J8M3	EMC4	ER membrane protein complex subunit 4
Q9NPA0	EMC7	ER membrane protein complex subunit 7
O43402	EMC8	ER membrane protein complex subunit 8
P50402	EMD	Emerin
Q96A84	EMID1	EMI domain-containing protein 1
Q9Y6C2	EMILIN1	EMILIN-1
Q9BXX0	EMILIN2	EMILIN-2
O00423	EML1	Echinoderm microtubule-associated protein-like 1
O95834	EML2	Echinoderm microtubule-associated protein-like 2
Q9HC35	EML4	Echinoderm microtubule-associated protein-like 4
Q8N8S7	ENAH	Protein enabled homolog
O94919	ENDOD1	Endonuclease domain-containing 1 protein
Q14249	ENDOG	Endonuclease G, mitochondrial
P21128	ENDOU	Poly(U)-specific endoribonuclease
Q8NFI3	ENGASE	Cytosolic endo-beta-N-acetylglucosaminidase
P06733	ENO1	Alpha-enolase
O43768	ENSA	Alpha-endosulfine
Q9Y5L3	ENTPD2	Ectonucleoside triphosphate diphosphohydrolase 2
O75355	ENTPD3	Ectonucleoside triphosphate diphosphohydrolase 3
Q9NPA8	ENY2	Transcription and mRNA export factor ENY2
Q09472	EP300	Histone acetyltransferase p300
Q96L91	EP400	E1A-binding protein p400
Q6ZTU2	EP400NL	EP400 N-terminal-like protein
P11171	EPB41	Protein 4.1
Q9H4G0	EPB41L1	Band 4.1-like protein 1
O43491	EPB41L2	Band 4.1-like protein 2
Q9Y2J2	EPB41L3	Band 4.1-like protein 3
Q9HCM4	EPB41L5	Band 4.1-like protein 5
Q9H2F5	EPC1	Enhancer of polycomb homolog 1
Q52LR7	EPC2	Enhancer of polycomb homolog 2
Q9HCE0	EPG5	Ectopic P granules protein 5 homolog
P54764	EPHA4	Ephrin type-A receptor 4
P54756	EPHA5	Ephrin type-A receptor 5
P54762	EPHB1	Ephrin type-B receptor 1
P29323	EPHB2	Ephrin type-B receptor 2
O15197	EPHB6	Ephrin type-B receptor 6
P34913	EPHX2	Bifunctional epoxide hydrolase 2
Q9Y6I3	EPN1	Epsin-1
O95208	EPN2	Epsin-2
P07814	EPRS	Bifunctional glutamate/proline--tRNA ligase
P42566	EPS15	Epidermal growth factor receptor substrate 15
Q9UBC2	EPS15L1	Epidermal growth factor receptor substrate 15-like 1
P11678	EPX	Eosinophil peroxidase
Q96RT1	ERBB2IP	Protein LAP2
Q8IUD2	ERC1	ELKS/Rab6-interacting/CAST family member 1
O15083	ERC2	ERC protein 2
P28715	ERCC5	DNA repair protein complementing XP-G cells
Q969X5	ERGIC1	Endoplasmic reticulum-Golgi intermediate compartment protein 1
Q9Y282	ERGIC3	Endoplasmic reticulum-Golgi intermediate compartment protein 3
P84090	ERH	Enhancer of rudimentary homolog
Q96DZ1	ERLEC1	Endoplasmic reticulum lectin 1
O94905	ERLIN2	Erlin-2
Q7Z2K6	ERMP1	Endoplasmic reticulum metallopeptidase 1
Q96HE7	ERO1L	ERO1-like protein alpha
P30040	ERP29	Endoplasmic reticulum resident protein 29
Q9BS26	ERP44	Endoplasmic reticulum resident protein 44
P10768	ESD	S-formylglutathione hydrolase
Q9H501	ESF1	ESF1 homolog
Q9BSJ8	ESYT1	Extended synaptotagmin-1
P62495	ETF1	Eukaryotic peptide chain release factor subunit 1
P13804	ETFA	Electron transfer flavoprotein subunit alpha, mitochondrial
P38117	ETFB	Electron transfer flavoprotein subunit beta
Q16134	ETFDH	Electron transfer flavoprotein-ubiquinone oxidoreductase, mitochondrial
O95571	ETHE1	Persulfide dioxygenase ETHE1, mitochondrial
O60447	EVI5	Ecotropic viral integration site 5 protein homolog
Q96CN4	EVI5L	EVI5-like protein
Q9UI08	EVL	Ena/VASP-like protein
Q92817	EVPL	Envoplakin
Q01844	EWSR1	RNA-binding protein EWS
Q9NV70	EXOC1	Exocyst complex component 1
Q96KP1	EXOC2	Exocyst complex component 2
O60645	EXOC3	Exocyst complex component 3
Q96A65	EXOC4	Exocyst complex component 4
O00471	EXOC5	Exocyst complex component 5
Q9Y2D4	EXOC6B	Exocyst complex component 6B
Q9UPT5	EXOC7	Exocyst complex component 7
Q8IYI6	EXOC8	Exocyst complex component 8
Q9Y2C4	EXOG	Nuclease EXOG, mitochondrial
Q9Y3B2	EXOSC1	Exosome complex component CSL4
Q01780	EXOSC10	Exosome component 10
Q13868	EXOSC2	Exosome complex component RRP4
Q5RKV6	EXOSC6	Exosome complex component MTR3
Q15024	EXOSC7	Exosome complex component RRP42
Q96B26	EXOSC8	Exosome complex component RRP43
O43909	EXTL3	Exostosin-like 3
P00734	F2	Prothrombin
P05413	FABP3	Fatty acid-binding protein, heart
P15090	FABP4	Fatty acid-binding protein, adipocyte
O15540	FABP7	Fatty acid-binding protein, brain
O95864	FADS2	Fatty acid desaturase 2
Q9UNN5	FAF1	FAS-associated factor 1
Q96CS3	FAF2	FAS-associated factor 2
P16930	FAH	Fumarylacetoacetase
Q6P587	FAHD1	Acylpyruvase FAHD1, mitochondrial
Q96GK7	FAHD2A	Fumarylacetoacetate hydrolase domain-containing protein 2A
O95990	FAM107A	Protein FAM107A
Q8IWE2	FAM114A1	Protein NOXP20
Q9NRY5	FAM114A2	Protein FAM114A2
Q6P1L5	FAM117B	Protein FAM117B
Q9NZB2	FAM120A	Constitutive coactivator of PPAR-gamma-like protein 1
Q9NX05	FAM120C	Constitutive coactivator of PPAR-gamma-like protein 2
Q8IXS8	FAM126B	Protein FAM126B
Q96TA1	FAM129B	Niban-like protein 1
Q5BKY9	FAM133B	Protein FAM133B
Q86VR2	FAM134C	Protein FAM134C
Q96C01	FAM136A	Protein FAM136A
Q8N612	FAM160A2	FTS and Hook-interacting protein
Q5W0V3	FAM160B1	Protein FAM160B1
Q96A26	FAM162A	Protein FAM162A
Q92567	FAM168A	Protein FAM168A
Q9Y6X4	FAM169A	Soluble lamin-associated protein of 75 kDa
A8MVW0	FAM171A2	Protein FAM171A2
Q8WUF8	FAM172A	Protein FAM172A
Q9H8M7	FAM188A	Protein FAM188A
Q9GZU8	FAM192A	Protein FAM192A
P78312	FAM193A	Protein FAM193A
C9JLW8	FAM195B	Protein FAM195B
Q6ZSG2	FAM196A	Protein FAM196A
Q9NSI2	FAM207A	Protein FAM207A
Q9UK61	FAM208A	Protein FAM208A
O75063	FAM20B	Glycosaminoglycan xylosylkinase
Q9BRX8	FAM213A	Redox-regulatory protein FAM213A
Q8TBF2	FAM213B	Prostamide/prostaglandin F synthase
Q8IW50	FAM219A	Protein FAM219A
Q641Q2	FAM21A	WASH complex subunit FAM21A
Q9Y421	FAM32A	Protein FAM32A
Q92520	FAM3C	Protein FAM3C
Q9H0Q0	FAM49A	Protein FAM49A
Q9NUQ9	FAM49B	Protein FAM49B
Q14320	FAM50A	Protein FAM50A
Q5HYJ3	FAM76B	Protein FAM76B
Q9UBU6	FAM8A1	Protein FAM8A1
Q8NCA5	FAM98A	Protein FAM98A
Q52LJ0	FAM98B	Protein FAM98B
Q9Y4F1	FARP1	FERM, RhoGEF and pleckstrin domain-containing protein 1
O95363	FARS2	Phenylalanine--tRNA ligase, mitochondrial
Q9Y285	FARSA	Phenylalanine--tRNA ligase alpha subunit
Q9NSD9	FARSB	Phenylalanine--tRNA ligase beta subunit
P49327	FASN	Fatty acid synthase
Q14517	FAT1	Protocadherin Fat 1
Q8TDW7	FAT3	Protocadherin Fat 3
P35544	FAU	Ubiquitin-like protein FUBI
P22087	FBL	rRNA 2'-O-methyltransferase fibrillarin
P23142	FBLN1	Fibulin-1
P09467	FBP1	Fructose-1,6-bisphosphatase 1
Q9H469	FBXL15	F-box/LRR-repeat protein 15
Q6PIJ6	FBXO38	F-box only protein 38
Q8TF61	FBXO41	F-box only protein 41
Q9UKB1	FBXW11	F-box/WD repeat-containing protein 11
Q9Y6R7	FCGBP	IgGFc-binding protein
O94868	FCHSD2	F-BAR and double SH3 domains protein 2
P37268	FDFT1	Squalene synthase
P14324	FDPS	Farnesyl pyrophosphate synthase
Q6P4F2	FDX1L	Adrenodoxin-like protein, mitochondrial
P22830	FECH	Ferrochelatase, mitochondrial
P39748	FEN1	Flap endonuclease 1
Q96AC1	FERMT2	Fermitin family homolog 2
Q9UGM5	FETUB	Fetuin-B
Q99689	FEZ1	Fasciculation and elongation protein zeta-1
Q9UHY8	FEZ2	Fasciculation and elongation protein zeta-2
P02671	FGA	Fibrinogen alpha chain
P02675	FGB	Fibrinogen beta chain
Q5JSP0	FGD3	FYVE, RhoGEF and PH domain-containing protein 3
Q96M96	FGD4	FYVE, RhoGEF and PH domain-containing protein 4
Q92913	FGF13	Fibroblast growth factor 13
Q8TAT2	FGFBP3	Fibroblast growth factor-binding protein 3
P11362	FGFR1	Fibroblast growth factor receptor 1
O95684	FGFR1OP	FGFR1 oncogene partner
P02679	FGG	Fibrinogen gamma chain
P07954	FH	Fumarate hydratase, mitochondrial
Q9Y613	FHOD1	FH1/FH2 domain-containing protein 1
Q6UN15	FIP1L1	Pre-mRNA 3'-end-processing factor FIP1
Q96AY3	FKBP10	Peptidyl-prolyl cis-trans isomerase FKBP10
Q9NYL4	FKBP11	Peptidyl-prolyl cis-trans isomerase FKBP11
Q5T1M5	FKBP15	FK506-binding protein 15
P62942	FKBP1A	Peptidyl-prolyl cis-trans isomerase FKBP1A
P68106	FKBP1B	Peptidyl-prolyl cis-trans isomerase FKBP1B
P26885	FKBP2	Peptidyl-prolyl cis-trans isomerase FKBP2
Q00688	FKBP3	Peptidyl-prolyl cis-trans isomerase FKBP3
Q02790	FKBP4	Peptidyl-prolyl cis-trans isomerase FKBP4
Q14318	FKBP8	Peptidyl-prolyl cis-trans isomerase FKBP8
O95302	FKBP9	Peptidyl-prolyl cis-trans isomerase FKBP9
Q8NFF5	FLAD1	FAD synthase
Q13045	FLII	Protein flightless-1 homolog
P21333	FLNA	Filamin-A
O75369	FLNB	Filamin-B
Q14315	FLNC	Filamin-C
O75955	FLOT1	Flotillin-1
Q14254	FLOT2	Flotillin-2
Q9NZU1	FLRT1	Leucine-rich repeat transmembrane protein FLRT1
Q96PY5	FMNL2	Formin-like protein 2
Q06787	FMR1	Fragile X mental retardation protein 1
P02751	FN1	Fibronectin
Q9HA64	FN3KRP	Ketosamine-3-kinase
Q96RU3	FNBP1	Formin-binding protein 1
Q5T0N5	FNBP1L	Formin-binding protein 1-like
Q8N3X1	FNBP4	Formin-binding protein 4
P49354	FNTA	Protein farnesyltransferase/geranylgeranyltransferase type-1 subunit alpha
Q5VW36	FOCAD	Focadhesin
Q9P0K8	FOXJ2	Forkhead box protein J2
Q9UPW0	FOXJ3	Forkhead box protein J3
Q01167	FOXK2	Forkhead box protein K2
Q08050	FOXM1	Forkhead box protein M1
O15409	FOXP2	Forkhead box protein P2
Q8IVH2	FOXP4	Forkhead box protein P4
Q96CU9	FOXRED1	FAD-dependent oxidoreductase domain-containing protein 1
Q9P2Q2	FRMD4A	FERM domain-containing protein 4A
Q5TBA9	FRY	Protein furry homolog
O94915	FRYL	Protein furry homolog-like
Q16658	FSCN1	Fascin
Q9BTV5	FSD1	Fibronectin type III and SPRY domain-containing protein 1
Q9BXM9	FSD1L	FSD1-like protein
Q12841	FSTL1	Follistatin-related protein 1
O95954	FTCD	Formimidoyltransferase-cyclodeaminase
P02794	FTH1	Ferritin heavy chain
Q8N4E7	FTMT	Ferritin, mitochondrial
Q8IY81	FTSJ3	pre-rRNA processing protein FTSJ3
Q96AE4	FUBP1	Far upstream element-binding protein 1
Q96I24	FUBP3	Far upstream element-binding protein 3
P04066	FUCA1	Tissue alpha-L-fucosidase
P35637	FUS	RNA-binding protein FUS
P51114	FXR1	Fragile X mental retardation syndrome-related protein 1
Q9H0Q3	FXYD6	FXYD domain-containing ion transport regulator 6
P06241	FYN	Tyrosine-protein kinase Fyn
Q96QD9	FYTTD1	UAP56-interacting factor
Q13283	G3BP1	Ras GTPase-activating protein-binding protein 1
Q9UN86	G3BP2	Ras GTPase-activating protein-binding protein 2
P11413	G6PD	Glucose-6-phosphate 1-dehydrogenase
P10253	GAA	Lysosomal alpha-glucosidase
Q13480	GAB1	GRB2-associated-binding protein 1
O95166	GABARAP	Gamma-aminobutyric acid receptor-associated protein
Q9H0R8	GABARAPL1	Gamma-aminobutyric acid receptor-associated protein-like 1
P60520	GABARAPL2	Gamma-aminobutyric acid receptor-associated protein-like 2
Q9UBS5	GABBR1	Gamma-aminobutyric acid type B receptor subunit 1
O75899	GABBR2	Gamma-aminobutyric acid type B receptor subunit 2
Q06546	GABPA	GA-binding protein alpha chain
Q8TAK5	GABPB2	GA-binding protein subunit beta-2
P47869	GABRA2	Gamma-aminobutyric acid receptor subunit alpha-2
P47870	GABRB2	Gamma-aminobutyric acid receptor subunit beta-2
Q99259	GAD1	Glutamate decarboxylase 1
Q05329	GAD2	Glutamate decarboxylase 2
Q8TAE8	GADD45GIP1	Growth arrest and DNA damage-inducible proteins-interacting protein 1
O14976	GAK	Cyclin-G-associated kinase
P22466	GAL	Galanin peptides
P54803	GALC	Galactocerebrosidase
Q14376	GALE	UDP-glucose 4-epimerase
P51570	GALK1	Galactokinase
P34059	GALNS	N-acetylgalactosamine-6-sulfatase
Q10471	GALNT2	Polypeptide N-acetylgalactosaminyltransferase 2
P07902	GALT	Galactose-1-phosphate uridylyltransferase
Q14353	GAMT	Guanidinoacetate N-methyltransferase
Q9H2C0	GAN	Gigaxonin
Q14697	GANAB	Neutral alpha-glucosidase AB
P17677	GAP43	Neuromodulin
P04406	GAPDH	Glyceraldehyde-3-phosphate dehydrogenase
Q14C86	GAPVD1	GTPase-activating protein and VPS9 domain-containing protein 1
Q9NY12	GAR1	H/ACA ribonucleoprotein complex subunit 1
Q5VVW2	GARNL3	GTPase-activating Rap/Ran-GAP domain-like protein 3
P41250	GARS	Glycine--tRNA ligase
P22102	GART	Trifunctional purine biosynthetic protein adenosine-3
O60861	GAS7	Growth arrest-specific protein 7
Q8WUU5	GATAD1	GATA zinc finger domain-containing protein 1
Q86YP4	GATAD2A	Transcriptional repressor p66-alpha
Q8WXI9	GATAD2B	Transcriptional repressor p66-beta
P04062	GBA	Glucosylceramidase
O75323	GBAS	Protein NipSnap homolog 2
Q04446	GBE1	1,4-alpha-glucan-branching enzyme
Q92538	GBF1	Golgi-specific brefeldin A-resistance guanine nucleotide exchange factor 1
P28676	GCA	Grancalcin
O75600	GCAT	2-amino-3-ketobutyrate coenzyme A ligase, mitochondrial
Q96CN9	GCC1	GRIP and coiled-coil domain-containing protein 1
Q8IWJ2	GCC2	GRIP and coiled-coil domain-containing protein 2
Q92947	GCDH	Glutaryl-CoA dehydrogenase, mitochondrial
P30793	GCH1	GTP cyclohydrolase 1
P30047	GCHFR	GTP cyclohydrolase 1 feedback regulatory protein
P48507	GCLM	Glutamate--cysteine ligase regulatory subunit
Q92616	GCN1L1	Translational activator GCN1
P23434	GCSH	Glycine cleavage system H protein, mitochondrial
Q8TB36	GDAP1	Ganglioside-induced differentiation-associated protein 1
Q96MZ0	GDAP1L1	Ganglioside-induced differentiation-associated protein 1-like 1
Q9NXN4	GDAP2	Ganglioside-induced differentiation-associated protein 2
Q9NZC3	GDE1	Glycerophosphodiester phosphodiesterase 1
P31150	GDI1	Rab GDP dissociation inhibitor alpha
P50395	GDI2	Rab GDP dissociation inhibitor beta
Q8N9F7	GDPD1	Glycerophosphodiester phosphodiesterase domain-containing protein 1
Q8TEQ6	GEMIN5	Gem-associated protein 5
P55789	GFER	FAD-linked sulfhydryl oxidase ALR
Q96RP9	GFM1	Elongation factor G, mitochondrial
Q06210	GFPT1	Glutamine--fructose-6-phosphate aminotransferase [isomerizing] 1
P56159	GFRA1	GDNF family receptor alpha-1
Q9UJY5	GGA1	ADP-ribosylation factor-binding protein GGA1
Q9NZ52	GGA3	ADP-ribosylation factor-binding protein GGA3
Q92820	GGH	Gamma-glutamyl hydrolase
Q9UJ14	GGT7	Gamma-glutamyltransferase 7
P01241	GH1	Somatotropin
Q9NWU2	GID8	Glucose-induced degradation protein 8 homolog
O75420	GIGYF1	PERQ amino acid-rich with GYF domain-containing protein 1
Q6Y7W6	GIGYF2	PERQ amino acid-rich with GYF domain-containing protein 2
Q9BRX5	GINS3	DNA replication complex GINS protein PSF3
Q9BRT9	GINS4	DNA replication complex GINS protein SLD5
O14908	GIPC1	PDZ domain-containing protein GIPC1
Q9Y2X7	GIT1	ARF GTPase-activating protein GIT1
Q14161	GIT2	ARF GTPase-activating protein GIT2
Q5VSY0	GKAP1	G kinase-anchoring protein 1
P16278	GLB1	Beta-galactosidase
Q6UWU2	GLB1L	Beta-galactosidase-1-like protein
P23378	GLDC	Glycine dehydrogenase (decarboxylating), mitochondrial
Q53GS7	GLE1	Nucleoporin GLE1
Q92896	GLG1	Golgi apparatus protein 1
Q9H4G4	GLIPR2	Golgi-associated plant pathogenesis-related protein 1
Q9HC38	GLOD4	Glyoxalase domain-containing protein 4
A6NK44	GLOD5	Glyoxalase domain-containing protein 5
P23416	GLRA2	Glycine receptor subunit alpha-2
O75311	GLRA3	Glycine receptor subunit alpha-3
P35754	GLRX	Glutaredoxin-1
O76003	GLRX3	Glutaredoxin-3
Q86SX6	GLRX5	Glutaredoxin-related protein 5, mitochondrial
O94925	GLS	Glutaminase kidney isoform, mitochondrial
Q9NZM4	GLTSCR1	Glioma tumor suppressor candidate region gene 1 protein
Q9NZM5	GLTSCR2	Glioma tumor suppressor candidate region gene 2 protein
P00367	GLUD1	Glutamate dehydrogenase 1, mitochondrial
P15104	GLUL	Glutamine synthetase
Q49A26	GLYR1	Putative oxidoreductase GLYR1
P17900	GM2A	Ganglioside GM2 activator
O60547	GMDS	GDP-mannose 4,6 dehydratase
Q9Y692	GMEB1	Glucocorticoid modulatory element-binding protein 1
P60983	GMFB	Glia maturation factor beta
Q9Y5P6	GMPPB	Mannose-1-phosphate guanyltransferase beta
Q9P2T1	GMPR2	GMP reductase 2
P49915	GMPS	GMP synthase [glutamine-hydrolyzing]
P29992	GNA11	Guanine nucleotide-binding protein subunit alpha-11
Q14344	GNA13	Guanine nucleotide-binding protein subunit alpha-13
P63096	GNAI1	Guanine nucleotide-binding protein G(i) subunit alpha-1
P04899	GNAI2	Guanine nucleotide-binding protein G(i) subunit alpha-2
P08754	GNAI3	Guanine nucleotide-binding protein G(k) subunit alpha
P09471	GNAO1	Guanine nucleotide-binding protein G(o) subunit alpha
P50148	GNAQ	Guanine nucleotide-binding protein G(q) subunit alpha
P19086	GNAZ	Guanine nucleotide-binding protein G(z) subunit alpha
P62873	GNB1	Guanine nucleotide-binding protein G(I)/G(S)/G(T) subunit beta-1
P63244	GNB2L1	Guanine nucleotide-binding protein subunit beta-2-like 1
Q9HAV0	GNB4	Guanine nucleotide-binding protein subunit beta-4
O14775	GNB5	Guanine nucleotide-binding protein subunit beta-5
Q9Y223	GNE	Bifunctional UDP-N-acetylglucosamine 2-epimerase/N-acetylmannosamine kinase
Q9P2W3	GNG13	Guanine nucleotide-binding protein G(I)/G(S)/G(O) subunit gamma-13
P59768	GNG2	Guanine nucleotide-binding protein G(I)/G(S)/G(O) subunit gamma-2
P63215	GNG3	Guanine nucleotide-binding protein G(I)/G(S)/G(O) subunit gamma-3
P50150	GNG4	Guanine nucleotide-binding protein G(I)/G(S)/G(O) subunit gamma-4
O60262	GNG7	Guanine nucleotide-binding protein G(I)/G(S)/G(O) subunit gamma-7
Q13823	GNL2	Nucleolar GTP-binding protein 2
Q9BVP2	GNL3	Guanine nucleotide-binding protein-like 3
P46926	GNPDA1	Glucosamine-6-phosphate isomerase 1
Q8TDQ7	GNPDA2	Glucosamine-6-phosphate isomerase 2
P15586	GNS	N-acetylglucosamine-6-sulfatase
Q92805	GOLGA1	Golgin subfamily A member 1
Q08379	GOLGA2	Golgin subfamily A member 2
Q08378	GOLGA3	Golgin subfamily A member 3
Q13439	GOLGA4	Golgin subfamily A member 4
Q8TBA6	GOLGA5	Golgin subfamily A member 5
Q14789	GOLGB1	Golgin subfamily B member 1
Q9H4A6	GOLPH3	Golgi phosphoprotein 3
Q9Y3E0	GOLT1B	Vesicle transport protein GOT1B
Q9HD26	GOPC	Golgi-associated PDZ and coiled-coil motif-containing protein
Q9BQQ3	GORASP1	Golgi reassembly-stacking protein 1
Q9H8Y8	GORASP2	Golgi reassembly-stacking protein 2
O14653	GOSR2	Golgi SNAP receptor complex member 2
P17174	GOT1	Aspartate aminotransferase, cytoplasmic
P00505	GOT2	Aspartate aminotransferase, mitochondrial
O43292	GPAA1	Glycosylphosphatidylinositol anchor attachment 1 protein
Q8IXQ4	GPALPP1	GPALPP motifs-containing protein 1
Q8N954	GPATCH11	G patch domain-containing protein 11
Q9UKJ3	GPATCH8	G patch domain-containing protein 8
P35052	GPC1	Glypican-1
O75487	GPC4	Glypican-4
Q9Y625	GPC6	Glypican-6
P21695	GPD1	Glycerol-3-phosphate dehydrogenase [NAD(+)], cytoplasmic
Q8N335	GPD1L	Glycerol-3-phosphate dehydrogenase 1-like protein
P43304	GPD2	Glycerol-3-phosphate dehydrogenase, mitochondrial
Q9NQX3	GPHN	Gephyrin
P06744	GPI	Glucose-6-phosphate isomerase
Q92917	GPKOW	G patch domain and KOW motifs-containing protein
P51674	GPM6A	Neuronal membrane glycoprotein M6-a
Q13491	GPM6B	Neuronal membrane glycoprotein M6-b
Q9HCN4	GPN1	GPN-loop GTPase 1
Q14956	GPNMB	Transmembrane glycoprotein NMB
Q5VW38	GPR107	Protein GPR107
O15354	GPR37	Prosaposin receptor GPR37
Q13098	GPS1	COP9 signalosome complex subunit 1
Q13227	GPS2	G protein pathway suppressor 2
P24298	GPT	Alanine aminotransferase 1
Q8TD30	GPT2	Alanine aminotransferase 2
P07203	GPX1	Glutathione peroxidase 1
P36969	GPX4	Phospholipid hydroperoxide glutathione peroxidase, mitochondrial
Q96SL4	GPX7	Glutathione peroxidase 7
Q96CP6	GRAMD1A	GRAM domain-containing protein 1A
P62993	GRB2	Growth factor receptor-bound protein 2
Q9C091	GREB1L	GREB1-like protein
Q9UBQ7	GRHPR	Glyoxylate reductase/hydroxypyruvate reductase
P42261	GRIA1	Glutamate receptor 1
P42262	GRIA2	Glutamate receptor 2
P42263	GRIA3	Glutamate receptor 3
P48058	GRIA4	Glutamate receptor 4
Q9ULK0	GRID1	Glutamate receptor ionotropic, delta-1
O43424	GRID2	Glutamate receptor ionotropic, delta-2
Q13002	GRIK2	Glutamate receptor ionotropic, kainate 2
Q13003	GRIK3	Glutamate receptor ionotropic, kainate 3
Q16478	GRIK5	Glutamate receptor ionotropic, kainate 5
Q05586	GRIN1	Glutamate receptor ionotropic, NMDA 1
Q13224	GRIN2B	Glutamate receptor ionotropic, NMDA 2B
Q9Y3R0	GRIP1	Glutamate receptor-interacting protein 1
Q4V328	GRIPAP1	GRIP1-associated protein 1
P34947	GRK5	G protein-coupled receptor kinase 5
Q14416	GRM2	Metabotropic glutamate receptor 2
Q9HAV7	GRPEL1	GrpE protein homolog 1, mitochondrial
Q12849	GRSF1	G-rich sequence factor 1
P49840	GSK3A	Glycogen synthase kinase-3 alpha
P49841	GSK3B	Glycogen synthase kinase-3 beta
P06396	GSN	Gelsolin
P15170	GSPT1	Eukaryotic peptide chain release factor GTP-binding subunit ERF3A
P48637	GSS	Glutathione synthetase
P08263	GSTA1	Glutathione S-transferase A1
Q8NEC7	GSTCD	Glutathione S-transferase C-terminal domain-containing protein
Q9Y2Q3	GSTK1	Glutathione S-transferase kappa 1
P09488	GSTM1	Glutathione S-transferase Mu 1
P78417	GSTO1	Glutathione S-transferase omega-1
P09211	GSTP1	Glutathione S-transferase P
P30711	GSTT1	Glutathione S-transferase theta-1
Q00403	GTF2B	Transcription initiation factor IIB
P29083	GTF2E1	General transcription factor IIE subunit 1
P29084	GTF2E2	Transcription initiation factor IIE subunit beta
P35269	GTF2F1	General transcription factor IIF subunit 1
P13984	GTF2F2	General transcription factor IIF subunit 2
P32780	GTF2H1	General transcription factor IIH subunit 1
Q92664	GTF3A	Transcription factor IIIA
O00178	GTPBP1	GTP-binding protein 1
Q9BZE4	GTPBP4	Nucleolar GTP-binding protein 1
P33402	GUCY1A2	Guanylate cyclase soluble subunit alpha-2
Q02153	GUCY1B3	Guanylate cyclase soluble subunit beta-1
Q16774	GUK1	Guanylate kinase
P46976	GYG1	Glycogenin-1
P13807	GYS1	Glycogen [starch] synthase, muscle
P07305	H1F0	Histone H1.0
Q92522	H1FX	Histone H1x
Q9BTM1	H2AFJ	Histone H2A.J
Q71UI9	H2AFV	Histone H2A.V
P16104	H2AFX	Histone H2AX
O75367	H2AFY	Core histone macro-H2A.1
Q9P0M6	H2AFY2	Core histone macro-H2A.2
P0C0S5	H2AFZ	Histone H2A.Z
P84243	H3F3A	Histone H3.3
Q5JVS0	HABP4	Intracellular hyaluronan-binding protein 4
Q9UJ83	HACL1	2-hydroxyacyl-CoA lyase 1
Q16836	HADH	Hydroxyacyl-coenzyme A dehydrogenase, mitochondrial
P40939	HADHA	Trifunctional enzyme subunit alpha, mitochondrial
P55084	HADHB	Trifunctional enzyme subunit beta, mitochondrial
Q16775	HAGH	Hydroxyacylglutathione hydrolase, mitochondrial
P12081	HARS	Histidine--tRNA ligase, cytoplasmic
O14929	HAT1	Histone acetyltransferase type B catalytic subunit
P69905	HBA1	Hemoglobin subunit alpha
P02042	HBD	Hemoglobin subunit delta
P02100	HBE1	Hemoglobin subunit epsilon
P69891	HBG1	Hemoglobin subunit gamma-1
Q9Y450	HBS1L	HBS1-like protein
P02008	HBZ	Hemoglobin subunit zeta
P53701	HCCS	Cytochrome c-type heme lyase
P51610	HCFC1	Host cell factor 1
O43612	HCRT	Orexin
Q13547	HDAC1	Histone deacetylase 1
Q92769	HDAC2	Histone deacetylase 2
P56524	HDAC4	Histone deacetylase 4
Q9UQL6	HDAC5	Histone deacetylase 5
Q9UBN7	HDAC6	Histone deacetylase 6
Q9BY41	HDAC8	Histone deacetylase 8
P51858	HDGF	Hepatoma-derived growth factor
Q7Z4V5	HDGFRP2	Hepatoma-derived growth factor-related protein 2
Q9Y3E1	HDGFRP3	Hepatoma-derived growth factor-related protein 3
Q08623	HDHD1	Pseudouridine-5'-phosphatase
Q00341	HDLBP	Vigilin
Q9H583	HEATR1	HEAT repeat-containing protein 1
Q7Z4Q2	HEATR3	HEAT repeat-containing protein 3
Q9P2D3	HEATR5B	HEAT repeat-containing protein 5B
Q9NRV9	HEBP1	Heme-binding protein 1
Q9Y5Z4	HEBP2	Heme-binding protein 2
Q9ULT8	HECTD1	E3 ubiquitin-protein ligase HECTD1
Q9Y4D8	HECTD4	Probable E3 ubiquitin-protein ligase HECTD4
Q76N89	HECW1	E3 ubiquitin-protein ligase HECW1
Q9NRZ9	HELLS	Lymphoid-specific helicase
P42694	HELZ	Probable helicase with zinc finger domain
Q15751	HERC1	Probable E3 ubiquitin-protein ligase HERC1
O95714	HERC2	E3 ubiquitin-protein ligase HERC2
P07686	HEXB	Beta-hexosaminidase subunit beta
O94992	HEXIM1	Protein HEXIM1
Q9BTY7	HGH1	Protein HGH1 homolog
O14964	HGS	Hepatocyte growth factor-regulated tyrosine kinase substrate
P31937	HIBADH	3-hydroxyisobutyrate dehydrogenase, mitochondrial
Q6NVY1	HIBCH	3-hydroxyisobutyryl-CoA hydrolase, mitochondrial
P49773	HINT1	Histidine triad nucleotide-binding protein 1
O00291	HIP1	Huntingtin-interacting protein 1
O75146	HIP1R	Huntingtin-interacting protein 1-related protein
P54198	HIRA	Protein HIRA
Q9BW71	HIRIP3	HIRA-interacting protein 3
P16401	HIST1H1B	Histone H1.5
P16402	HIST1H1D	Histone H1.3
P20671	HIST1H2AD	Histone H2A type 1-D
P0C0S8	HIST1H2AG	Histone H2A type 1
Q96KK5	HIST1H2AH	Histone H2A type 1-H
Q99878	HIST1H2AJ	Histone H2A type 1-J
Q96A08	HIST1H2BA	Histone H2B type 1-A
P06899	HIST1H2BJ	Histone H2B type 1-J
P62805	HIST1H4A	Histone H4
Q8IUE6	HIST2H2AB	Histone H2A type 2-B
Q71DI3	HIST2H3A	Histone H3.2
Q71DI3	HIST2H3A	Histone H3.2
Q71DI3	HIST2H3A	Histone H3.2
P31629	HIVEP2	Transcription factor HIVEP2
P19367	HK1	Hexokinase-1
Q8TCT9	HM13	Minor histocompatibility antigen H13
Q6NT76	HMBOX1	Homeobox-containing protein 1
Q9NP66	HMG20A	High mobility group protein 20A
Q9P0W2	HMG20B	SWI/SNF-related matrix-associated actin-dependent regulator of chromatin subfamily E member 1-related
P52926	HMGA2	High mobility group protein HMGI-C
P09429	HMGB1	High mobility group protein B1
P26583	HMGB2	High mobility group protein B2
O15347	HMGB3	High mobility group protein B3
P35914	HMGCL	Hydroxymethylglutaryl-CoA lyase, mitochondrial
Q01581	HMGCS1	Hydroxymethylglutaryl-CoA synthase, cytoplasmic
P54868	HMGCS2	Hydroxymethylglutaryl-CoA synthase, mitochondrial
P05114	HMGN1	Non-histone chromosomal protein HMG-14
P05204	HMGN2	Non-histone chromosomal protein HMG-17
Q15651	HMGN3	High mobility group nucleosome-binding domain-containing protein 3
Q9UGU5	HMGXB4	HMG domain-containing protein 4
P09601	HMOX1	Heme oxygenase 1
P30519	HMOX2	Heme oxygenase 2
Q9UK76	HN1	Hematological and neurological expressed 1 protein
Q9H910	HN1L	Hematological and neurological expressed 1-like protein
Q13151	HNRNPA0	Heterogeneous nuclear ribonucleoprotein A0
P09651	HNRNPA1	Heterogeneous nuclear ribonucleoprotein A1
P22626	HNRNPA2B1	Heterogeneous nuclear ribonucleoproteins A2/B1
P51991	HNRNPA3	Heterogeneous nuclear ribonucleoprotein A3
Q99729	HNRNPAB	Heterogeneous nuclear ribonucleoprotein A/B
P07910	HNRNPC	Heterogeneous nuclear ribonucleoproteins C1/C2
Q14103	HNRNPD	Heterogeneous nuclear ribonucleoprotein D0
O14979	HNRNPDL	Heterogeneous nuclear ribonucleoprotein D-like
P31943	HNRNPH1	Heterogeneous nuclear ribonucleoprotein H
P55795	HNRNPH2	Heterogeneous nuclear ribonucleoprotein H2
P31942	HNRNPH3	Heterogeneous nuclear ribonucleoprotein H3
P61978	HNRNPK	Heterogeneous nuclear ribonucleoprotein K
P14866	HNRNPL	Heterogeneous nuclear ribonucleoprotein L
Q8WVV9	HNRNPLL	Heterogeneous nuclear ribonucleoprotein L-like
P52272	HNRNPM	Heterogeneous nuclear ribonucleoprotein M
O43390	HNRNPR	Heterogeneous nuclear ribonucleoprotein R
Q00839	HNRNPU	Heterogeneous nuclear ribonucleoprotein U
Q9BUJ2	HNRNPUL1	Heterogeneous nuclear ribonucleoprotein U-like protein 1
Q1KMD3	HNRNPUL2	Heterogeneous nuclear ribonucleoprotein U-like protein 2
Q86YM7	HOMER1	Homer protein homolog 1
Q9NSB8	HOMER2	Homer protein homolog 2
Q9NSC5	HOMER3	Homer protein homolog 3
Q8IX15	HOMEZ	Homeobox and leucine zipper protein Homez
Q86VS8	HOOK3	Protein Hook homolog 3
Q5SSJ5	HP1BP3	Heterochromatin protein 1-binding protein 3
P84074	HPCA	Neuron-specific calcium-binding protein hippocalcin
P37235	HPCAL1	Hippocalcin-like protein 1
Q9UM19	HPCAL4	Hippocalcin-like protein 4
P32754	HPD	4-hydroxyphenylpyruvate dioxygenase
O60760	HPGDS	Hematopoietic prostaglandin D synthase
P00492	HPRT1	Hypoxanthine-guanine phosphoribosyltransferase
Q9Y251	HPSE	Heparanase
P52758	HRSP12	Ribonuclease UK114
Q53T59	HS1BP3	HCLS1-binding protein 3
O75506	HSBP1	Heat shock factor-binding protein 1
Q99714	HSD17B10	3-hydroxyacyl-CoA dehydrogenase type-2
Q53GQ0	HSD17B12	Very-long-chain 3-oxoacyl-CoA reductase
P51659	HSD17B4	Peroxisomal multifunctional enzyme type 2
Q92506	HSD17B8	Estradiol 17-beta-dehydrogenase 8
Q6YN16	HSDL2	Hydroxysteroid dehydrogenase-like protein 2
Q03933	HSF2	Heat shock factor protein 2
P07900	HSP90AA1	Heat shock protein HSP 90-alpha
P08238	HSP90AB1	Heat shock protein HSP 90-beta
P14625	HSP90B1	Endoplasmin
Q58FF3	HSP90B2P	Putative endoplasmin-like protein
Q0VDF9	HSPA14	Heat shock 70 kDa protein 14
P0DMV8	HSPA1A	Heat shock 70 kDa protein 1A
P0DMV9	HSPA1B	Heat shock 70 kDa protein 1B
P34931	HSPA1L	Heat shock 70 kDa protein 1-like
P34932	HSPA4	Heat shock 70 kDa protein 4
P11021	HSPA5	78 kDa glucose-regulated protein
P11142	HSPA8	Heat shock cognate 71 kDa protein
P38646	HSPA9	Stress-70 protein, mitochondrial
P10809	HSPD1	60 kDa heat shock protein, mitochondrial
P61604	HSPE1	10 kDa heat shock protein, mitochondrial
P98160	HSPG2	Basement membrane-specific heparan sulfate proteoglycan core protein
Q92598	HSPH1	Heat shock protein 105 kDa
O43719	HTATSF1	HIV Tat-specific factor 1
O43464	HTRA2	Serine protease HTRA2, mitochondrial
P42858	HTT	Huntingtin
Q7Z6Z7	HUWE1	E3 ubiquitin-protein ligase HUWE1
Q12891	HYAL2	Hyaluronidase-2
Q9Y4L1	HYOU1	Hypoxia up-regulated protein 1
Q9NX55	HYPK	Huntingtin-interacting protein K
Q2TAA2	IAH1	Isoamyl acetate-hydrolyzing esterase 1 homolog
P41252	IARS	Isoleucine--tRNA ligase, cytoplasmic
Q5T440	IBA57	Putative transferase CAF17, mitochondrial
Q05084	ICA1	Islet cell autoantigen 1
P47928	ID4	DNA-binding protein inhibitor ID-4
P14735	IDE	Insulin-degrading enzyme
O75874	IDH1	Isocitrate dehydrogenase [NADP] cytoplasmic
P48735	IDH2	Isocitrate dehydrogenase [NADP], mitochondrial
P50213	IDH3A	Isocitrate dehydrogenase [NAD] subunit alpha, mitochondrial
O43837	IDH3B	Isocitrate dehydrogenase [NAD] subunit beta, mitochondrial
P51553	IDH3G	Isocitrate dehydrogenase [NAD] subunit gamma, mitochondrial
Q13907	IDI1	Isopentenyl-diphosphate Delta-isomerase 1
Q9Y5U9	IER3IP1	Immediate early response 3-interacting protein 1
Q01628	IFITM3	Interferon-induced transmembrane protein 3
Q9H7X7	IFT22	Intraflagellar transport protein 22 homolog
Q96FT9	IFT43	Intraflagellar transport protein 43 homolog
Q9Y366	IFT52	Intraflagellar transport protein 52 homolog
Q8WYA0	IFT81	Intraflagellar transport protein 81 homolog
P78318	IGBP1	Immunoglobulin-binding protein 1
P08069	IGF1R	Insulin-like growth factor 1 receptor
O00425	IGF2BP3	Insulin-like growth factor 2 mRNA-binding protein 3
P11717	IGF2R	Cation-independent mannose-6-phosphate receptor
Q96ID5	IGSF21	Immunoglobulin superfamily member 21
O75054	IGSF3	Immunoglobulin superfamily member 3
Q969P0	IGSF8	Immunoglobulin superfamily member 8
Q9P2J2	IGSF9	Protein turtle homolog A
Q13123	IK	Protein Red
O95163	IKBKAP	Elongator complex protein 1
Q9Y6K9	IKBKG	NF-kappa-B essential modulator
Q71H61	ILDR2	Immunoglobulin-like domain-containing receptor 2
Q12905	ILF2	Interleukin enhancer-binding factor 2
Q12906	ILF3	Interleukin enhancer-binding factor 3
Q13418	ILK	Integrin-linked protein kinase
Q16891	IMMT	MICOS complex subunit MIC60
Q9NV31	IMP3	U3 small nucleolar ribonucleoprotein protein IMP3
Q96G21	IMP4	U3 small nucleolar ribonucleoprotein protein IMP4
P29218	IMPA1	Inositol monophosphatase 1
O14732	IMPA2	Inositol monophosphatase 2
P20839	IMPDH1	Inosine-5'-monophosphate dehydrogenase 1
P12268	IMPDH2	Inosine-5'-monophosphate dehydrogenase 2
Q16352	INA	Alpha-internexin
Q9UNL4	ING4	Inhibitor of growth protein 4
Q9NRY2	INIP	SOSS complex subunit C
P49441	INPP1	Inositol polyphosphate 1-phosphatase
Q96PE3	INPP4A	Type I inositol 3,4-bisphosphate 4-phosphatase
Q14642	INPP5A	Type I inositol 1,4,5-trisphosphate 5-phosphatase
Q9Y2H2	INPP5F	Phosphatidylinositide phosphatase SAC2
Q9BT40	INPP5K	Inositol polyphosphate 5-phosphatase K
Q9Y581	INSL6	Insulin-like peptide INSL6
Q01101	INSM1	Insulinoma-associated protein 1
P06213	INSR	Insulin receptor
Q8N201	INTS1	Integrator complex subunit 1
Q9NVR2	INTS10	Integrator complex subunit 10
Q9H0H0	INTS2	Integrator complex subunit 2
Q68E01	INTS3	Integrator complex subunit 3
Q9UI26	IPO11	Importin-11
O94829	IPO13	Importin-13
Q8TEX9	IPO4	Importin-4
O00410	IPO5	Importin-5
O95373	IPO7	Importin-7
O15397	IPO8	Importin-8
Q96P70	IPO9	Importin-9
Q15051	IQCB1	IQ calmodulin-binding motif-containing protein 1
P46940	IQGAP1	Ras GTPase-activating-like protein IQGAP1
Q13576	IQGAP2	Ras GTPase-activating-like protein IQGAP2
Q6DN90	IQSEC1	IQ motif and SEC7 domain-containing protein 1
Q5JU85	IQSEC2	IQ motif and SEC7 domain-containing protein 2
Q9UPP2	IQSEC3	IQ motif and SEC7 domain-containing protein 3
Q7Z5L9	IRF2BP2	Interferon regulatory factor 2-binding protein 2
Q9H1B7	IRF2BPL	Interferon regulatory factor 2-binding protein-like
Q14653	IRF3	Interferon regulatory factor 3
Q6UXK2	ISLR2	Immunoglobulin superfamily containing leucine-rich repeat protein 2
Q96CN7	ISOC1	Isochorismatase domain-containing protein 1
Q96AB3	ISOC2	Isochorismatase domain-containing protein 2, mitochondrial
P53990	IST1	IST1 homolog
Q9ULR0	ISY1	Pre-mRNA-splicing factor ISY1 homolog
Q9NPH2	ISYNA1	Inositol-3-phosphate synthase 1
Q96J02	ITCH	E3 ubiquitin-protein ligase Itchy homolog
Q8TB96	ITFG1	T-cell immunomodulatory protein
P23229	ITGA6	Integrin alpha-6
P06756	ITGAV	Integrin alpha-V
P05556	ITGB1	Integrin beta-1
P16144	ITGB4	Integrin beta-4
P18084	ITGB5	Integrin beta-5
P19823	ITIH2	Inter-alpha-trypsin inhibitor heavy chain H2
Q06033	ITIH3	Inter-alpha-trypsin inhibitor heavy chain H3
Q8WWA0	ITLN1	Intelectin-1
Q9Y287	ITM2B	Integral membrane protein 2B
Q9BY32	ITPA	Inosine triphosphate pyrophosphatase
Q14643	ITPR1	Inositol 1,4,5-trisphosphate receptor type 1
Q15811	ITSN1	Intersectin-1
P26440	IVD	Isovaleryl-CoA dehydrogenase, mitochondrial
Q96ST2	IWS1	Protein IWS1 homolog
P23458	JAK1	Tyrosine-protein kinase JAK1
P57087	JAM2	Junctional adhesion molecule B
Q9BX67	JAM3	Junctional adhesion molecule C
P14923	JUP	Junction plakoglobin
O60229	KALRN	Kalirin
Q14678	KANK1	KN motif and ankyrin repeat domain-containing protein 1
Q6NY19	KANK3	KN motif and ankyrin repeat domain-containing protein 3
Q9H9L4	KANSL2	KAT8 regulatory NSL complex subunit 2
Q9P2N6	KANSL3	KAT8 regulatory NSL complex subunit 3
Q15046	KARS	Lysine--tRNA ligase
Q92794	KAT6A	Histone acetyltransferase KAT6A
O95251	KAT7	Histone acetyltransferase KAT7
Q9BW62	KATNAL1	Katanin p60 ATPase-containing subunit A-like 1
Q9BVA0	KATNB1	Katanin p80 WD40 repeat-containing subunit B1
Q674X7	KAZN	Kazrin
O94819	KBTBD11	Kelch repeat and BTB domain-containing protein 11
Q9P0J7	KCMF1	E3 ubiquitin-protein ligase KCMF1
P48547	KCNC1	Potassium voltage-gated channel subfamily C member 1
[truncated: 2,834 more rows]

## Sheet: Nascent proteome
UniprotKB	Gene Symbol	Protein Name
P49588	AARS	Alanine--tRNA ligase, cytoplasmic
Q9UDR5	AASS	Alpha-aminoadipic semialdehyde synthase, mitochondrial
P80404	ABAT	4-aminobutyrate aminotransferase, mitochondrial
Q99758	ABCA3	ATP-binding cassette sub-family A member 3
P45954	ACADSB	Short/branched chain specific acyl-CoA dehydrogenase, mitochondrial
P21399	ACO1	Cytoplasmic aconitate hydratase
Q99798	ACO2	Aconitate hydratase, mitochondrial
P68133	ACTA1	Actin, alpha skeletal muscle
P62736	ACTA2	Actin, aortic smooth muscle
P60709	ACTB	Actin, cytoplasmic 1
P68032	ACTC1	Actin, alpha cardiac muscle 1
P63261	ACTG1	Actin, cytoplasmic 2
O96019	ACTL6A	Actin-like protein 6A
Q9NZ32	ACTR10	Actin-related protein 10
P61163	ACTR1A	Alpha-centractin
P61160	ACTR2	Actin-related protein 2
P61158	ACTR3	Actin-related protein 3
P27037	ACVR2A	Activin receptor type-2A
Q13705	ACVR2B	Activin receptor type-2B
P55265	ADAR	Double-stranded RNA-specific adenosine deaminase
P35611	ADD1	Alpha-adducin
P55263	ADK	Adenosine kinase
P30520	ADSS	Adenylosuccinate synthetase isozyme 2
Q9HCK5	AGO4	Protein argonaute-4
Q96HN2	AHCYL2	Adenosylhomocysteinase 3
Q5TGY3	AHDC1	AT-hook DNA-binding motif-containing protein 1
Q09666	AHNAK	Neuroblast differentiation-associated protein AHNAK
P00568	AK1	Adenylate kinase isoenzyme 1
Q9Y6K8	AK5	Adenylate kinase isoenzyme 5
Q02952	AKAP12	A-kinase anchor protein 12
P31751	AKT2	RAC-beta serine/threonine-protein kinase
P51648	ALDH3A2	Fatty aldehyde dehydrogenase
P51649	ALDH5A1	Succinate-semialdehyde dehydrogenase, mitochondrial
P49189	ALDH9A1	4-trimethylaminobutyraldehyde dehydrogenase
P09972	ALDOC	Fructose-bisphosphate aldolase C
Q01484	ANK2	Ankyrin-2
Q12955	ANK3	Ankyrin-3
Q8IZ07	ANKRD13A	Ankyrin repeat domain-containing protein 13A
Q86W74	ANKRD46	Ankyrin repeat domain-containing protein 46
O95782	AP2A1	AP-2 complex subunit alpha-1
O94973	AP2A2	AP-2 complex subunit alpha-2
O14617	AP3D1	AP-3 complex subunit delta-1
Q02410	APBA1	Amyloid beta A4 precursor protein-binding family A member 1
O00213	APBB1	Amyloid beta A4 precursor protein-binding family B member 1
P25054	APC	Adenomatous polyposis coli protein
Q9BZZ5	API5	Apoptosis inhibitor 5
Q06481	APLP2	Amyloid-like protein 2
P04114	APOB	Apolipoprotein B-100
P84077	ARF1	ADP-ribosylation factor 1
P61204	ARF3	ADP-ribosylation factor 3
P40616	ARL1	ADP-ribosylation factor-like protein 1
O75915	ARL6IP5	PRA1 family protein 3
Q9HBZ2	ARNT2	Aryl hydrocarbon receptor nuclear translocator 2
P56211	ARPP19	cAMP-regulated phosphoprotein 19
O00192	ARVCF	Armadillo repeat protein deleted in velo-cardio-facial syndrome
O43681	ASNA1	ATPase ASNA1
Q6VMQ6	ATF7IP	Activating transcription factor 7-interacting protein 1
Q8WXF7	ATL1	Atlastin-1
P54707	ATP12A	Potassium-transporting ATPase alpha chain 2
P13637	ATP1A3	Sodium/potassium-transporting ATPase subunit alpha-3
P05026	ATP1B1	Sodium/potassium-transporting ATPase subunit beta-1
P54709	ATP1B3	Sodium/potassium-transporting ATPase subunit beta-3
O14983	ATP2A1	Sarcoplasmic/endoplasmic reticulum calcium ATPase 1
P16615	ATP2A2	Sarcoplasmic/endoplasmic reticulum calcium ATPase 2
Q93084	ATP2A3	Sarcoplasmic/endoplasmic reticulum calcium ATPase 3
O75185	ATP2C2	Calcium-transporting ATPase type 2C member 2
P25705	ATP5A1	ATP synthase subunit alpha, mitochondrial
P06576	ATP5B	ATP synthase subunit beta, mitochondrial
O75947	ATP5H	ATP synthase subunit d, mitochondrial
Q93050	ATP6V0A1	V-type proton ATPase 116 kDa subunit a isoform 1
P38606	ATP6V1A	V-type proton ATPase catalytic subunit A
P21281	ATP6V1B2	V-type proton ATPase subunit B, brain isoform
P36543	ATP6V1E1	V-type proton ATPase subunit E 1
Q16864	ATP6V1F	V-type proton ATPase subunit F
Q9Y2T1	AXIN2	Axin-2
Q96L58	B3GALT6	Beta-1,3-galactosyltransferase 6
O14514	BAI1	Brain-specific angiogenesis inhibitor 1
Q9NY43	BARHL2	BarH-like 2 homeobox protein
Q9P287	BCCIP	BRCA2 and CDKN1A-interacting protein
P12694	BCKDHA	2-oxoisovalerate dehydrogenase subunit alpha, mitochondrial
P11274	BCR	Breakpoint cluster region protein
Q15059	BRD3	Bromodomain-containing protein 3
Q96K17	BTF3L4	Transcription factor BTF3 homolog 4
Q86T20	C6orf1	Uncharacterized protein C6orf1
Q96LT7	C9orf72	Protein C9orf72
Q9NY47	CACNA2D2	Voltage-dependent calcium channel subunit alpha-2/delta-2
P62158	CALM1	Calmodulin
Q14012	CAMK1	Calcium/calmodulin-dependent protein kinase type 1
Q8IU85	CAMK1D	Calcium/calmodulin-dependent protein kinase type 1D
Q13554	CAMK2B	Calcium/calmodulin-dependent protein kinase type II subunit beta
Q13557	CAMK2D	Calcium/calmodulin-dependent protein kinase type II subunit delta
Q13555	CAMK2G	Calcium/calmodulin-dependent protein kinase type II subunit gamma
Q8N5S9	CAMKK1	Calcium/calmodulin-dependent protein kinase kinase 1
Q86VP6	CAND1	Cullin-associated NEDD8-dissociated protein 1
P27824	CANX	Calnexin
P40123	CAP2	Adenylyl cyclase-associated protein 2
P07384	CAPN1	Calpain-1 catalytic subunit
P04632	CAPNS1	Calpain small subunit 1
Q96L46	CAPNS2	Calpain small subunit 2
Q14444	CAPRIN1	Caprin-1
P52907	CAPZA1	F-actin-capping protein subunit alpha-1
P47755	CAPZA2	F-actin-capping protein subunit alpha-2
P04040	CAT	Catalase
P83916	CBX1	Chromobox protein homolog 1
Q13185	CBX3	Chromobox protein homolog 3
Q96A33	CCDC47	Coiled-coil domain-containing protein 47
A6NKD9	CCDC85C	Coiled-coil domain-containing protein 85C
Q8WWL7	CCNB3	G2/mitotic-specific cyclin-B3
P78371	CCT2	T-complex protein 1 subunit beta
P49368	CCT3	T-complex protein 1 subunit gamma
P50991	CCT4	T-complex protein 1 subunit delta
P48643	CCT5	T-complex protein 1 subunit epsilon
Q99832	CCT7	T-complex protein 1 subunit eta
P50990	CCT8	T-complex protein 1 subunit theta
O95400	CD2BP2	CD2 antigen cytoplasmic tail-binding protein 2
Q16543	CDC37	Hsp90 co-chaperone Cdc37
Q9H3Q1	CDC42EP4	Cdc42 effector protein 4
Q6P1J9	CDC73	Parafibromin
P55287	CDH11	Cadherin-11
Q00535	CDK5	Cyclin-dependent-like kinase 5
O60308	CEP104	Centrosomal protein of 104 kDa
Q5SW79	CEP170	Centrosomal protein of 170 kDa
O15182	CETN3	Centrin-3
Q9NZZ3	CHMP5	Charged multivesicular body protein 5
Q99653	CHP1	Calcineurin B homologous protein 1
Q9Y3Y2	CHTOP	Chromatin target of PRMT1 protein
Q14011	CIRBP	Cold-inducible RNA-binding protein
P12277	CKB	Creatine kinase B-type
P12532	CKMT1A	Creatine kinase U-type, mitochondrial
P17540	CKMT2	Creatine kinase S-type, mitochondrial
Q7Z460	CLASP1	CLIP-associating protein 1
Q96DZ5	CLIP3	CAP-Gly domain-containing linker protein 3
Q00610	CLTC	Clathrin heavy chain 1
Q12860	CNTN1	Contactin-1
P39060	COL18A1	Collagen alpha-1(XVIII) chain
O14579	COPE	Coatomer subunit epsilon
Q9UNS2	COPS3	COP9 signalosome complex subunit 3
P20674	COX5A	Cytochrome c oxidase subunit 5A, mitochondrial
Q9HCH3	CPNE5	Copine-5
Q86YQ8	CPNE8	Copine-8
Q16630	CPSF6	Cleavage and polyadenylation specificity factor subunit 6
Q8N684	CPSF7	Cleavage and polyadenylation specificity factor subunit 7
Q14194	CRMP1	Dihydropyrimidinase-related protein 1
Q6UUV9	CRTC1	CREB-regulated transcription coactivator 1
Q6UUV7	CRTC3	CREB-regulated transcription coactivator 3
O75390	CS	Citrate synthase, mitochondrial
O75534	CSDE1	Cold shock domain-containing protein E1
P48729	CSNK1A1	Casein kinase I isoform alpha
P35221	CTNNA1	Catenin alpha-1
P35222	CTNNB1	Catenin beta-1
Q9NWM3	CUEDC1	CUE domain-containing protein 1
Q9H2H0	CXXC4	CXXC-type zinc finger protein 4
Q4G0S4	CYP27C1	Cytochrome P450 27C1
O43739	CYTH3	Cytohesin-3
Q14118	DAG1	Dystroglycan
A0PJW8	DAPL1	Death-associated protein-like 1
Q15038	DAZAP2	DAZ-associated protein 2
P07108	DBI	Acyl-CoA-binding protein
Q14203	DCTN1	Dynactin subunit 1
Q13561	DCTN2	Dynactin subunit 2
O43602	DCX	Neuronal migration protein doublecortin
P20711	DDC	Aromatic-L-amino-acid decarboxylase
P39656	DDOST	Dolichyl-diphosphooligosaccharide--protein glycosyltransferase 48 kDa subunit
Q13206	DDX10	Probable ATP-dependent RNA helicase DDX10
Q92841	DDX17	Probable ATP-dependent RNA helicase DDX17
O00148	DDX39A	ATP-dependent RNA helicase DDX39A
O00571	DDX3X	ATP-dependent RNA helicase DDX3X
Q86XP3	DDX42	ATP-dependent RNA helicase DDX42
P17844	DDX5	Probable ATP-dependent RNA helicase DDX5
P35659	DEK	Protein DEK
Q8TEH3	DENND1A	DENN domain-containing protein 1A
Q9Y315	DERA	Deoxyribose-phosphate aldolase
O43143	DHX15	Pre-mRNA-splicing factor ATP-dependent RNA helicase DHX15
Q08211	DHX9	ATP-dependent RNA helicase A
Q14689	DIP2A	Disco-interacting protein 2 homolog A
Q9P265	DIP2B	Disco-interacting protein 2 homolog B
Q9Y2E4	DIP2C	Disco-interacting protein 2 homolog C
Q8WWF6	DNAJB3	DnaJ homolog subfamily B member 3
O75190	DNAJB6	DnaJ homolog subfamily B member 6
Q7Z6W7	DNAJB7	DnaJ homolog subfamily B member 7
Q9NVM6	DNAJC17	DnaJ homolog subfamily C member 17
Q99615	DNAJC7	DnaJ homolog subfamily C member 7
Q05193	DNM1	Dynamin-1
O00429	DNM1L	Dynamin-1-like protein
O43598	DNPH1	2'-deoxynucleoside 5'-phosphate N-hydrolase 1
Q14185	DOCK1	Dedicator of cytokinesis protein 1
Q16555	DPYSL2	Dihydropyrimidinase-related protein 2
Q14195	DPYSL3	Dihydropyrimidinase-related protein 3
Q9Y4J8	DTNA	Dystrobrevin alpha
O60941	DTNB	Dystrobrevin beta
Q14204	DYNC1H1	Cytoplasmic dynein 1 heavy chain 1
Q9Y6G9	DYNC1LI1	Cytoplasmic dynein 1 light intermediate chain 1
Q9NP97	DYNLRB1	Dynein light chain roadblock-type 1
Q9UH73	EBF1	Transcription factor COE1
Q9H4W6	EBF3	Transcription factor COE3
Q9BQW3	EBF4	Transcription factor COE4
P42892	ECE1	Endothelin-converting enzyme 1
O60344	ECE2	Endothelin-converting enzyme 2
Q05639	EEF1A2	Elongation factor 1-alpha 2
P24534	EEF1B2	Elongation factor 1-beta
P26641	EEF1G	Elongation factor 1-gamma
Q9NZN3	EHD3	EH domain-containing protein 3
Q9H223	EHD4	EH domain-containing protein 4
P05198	EIF2S1	Eukaryotic translation initiation factor 2 subunit 1
P20042	EIF2S2	Eukaryotic translation initiation factor 2 subunit 2
Q14152	EIF3A	Eukaryotic translation initiation factor 3 subunit A
O15372	EIF3H	Eukaryotic translation initiation factor 3 subunit H
O75822	EIF3J	Eukaryotic translation initiation factor 3 subunit J
Q9UBQ5	EIF3K	Eukaryotic translation initiation factor 3 subunit K
Q7L2H7	EIF3M	Eukaryotic translation initiation factor 3 subunit M
P60842	EIF4A1	Eukaryotic initiation factor 4A-I
P38919	EIF4A3	Eukaryotic initiation factor 4A-III
P23588	EIF4B	Eukaryotic translation initiation factor 4B
Q13542	EIF4EBP2	Eukaryotic translation initiation factor 4E-binding protein 2
Q9NRA8	EIF4ENIF1	Eukaryotic translation initiation factor 4E transporter
Q04637	EIF4G1	Eukaryotic translation initiation factor 4 gamma 1
P78344	EIF4G2	Eukaryotic translation initiation factor 4 gamma 2
P55010	EIF5	Eukaryotic translation initiation factor 5
O43402	EMC8	ER membrane protein complex subunit 8
P06733	ENO1	Alpha-enolase
O43768	ENSA	Alpha-endosulfine
Q9H201	EPN3	Epsin-3
P28715	ERCC5	DNA repair protein complementing XP-G cells
Q96HE7	ERO1L	ERO1-like protein alpha
P11474	ESRRA	Steroid hormone receptor ERR1
P62495	ETF1	Eukaryotic peptide chain release factor subunit 1
Q15024	EXOSC7	Exosome complex component RRP42
P05413	FABP3	Fatty acid-binding protein, heart
O15540	FABP7	Fatty acid-binding protein, brain
Q9Y6X4	FAM169A	Soluble lamin-associated protein of 75 kDa
Q3ZCQ3	FAM174B	Membrane protein FAM174B
Q9H8M7	FAM188A	Protein FAM188A
Q9NSI2	FAM207A	Protein FAM207A
Q8TBF2	FAM213B	Prostamide/prostaglandin F synthase
Q8N2R8	FAM43A	Protein FAM43A
Q9H0Q0	FAM49A	Protein FAM49A
Q9NUQ9	FAM49B	Protein FAM49B
Q9Y4F1	FARP1	FERM, RhoGEF and pleckstrin domain-containing protein 1
P49327	FASN	Fatty acid synthase
Q6V0I7	FAT4	Protocadherin Fat 4
Q96M96	FGD4	FYVE, RhoGEF and PH domain-containing protein 4
P68106	FKBP1B	Peptidyl-prolyl cis-trans isomerase FKBP1B
P21333	FLNA	Filamin-A
O75955	FLOT1	Flotillin-1
Q14254	FLOT2	Flotillin-2
P49354	FNTA	Protein farnesyltransferase/geranylgeranyltransferase type-1 subunit alpha
Q08050	FOXM1	Forkhead box protein M1
Q8IVH2	FOXP4	Forkhead box protein P4
O94915	FRYL	Protein furry homolog-like
Q16658	FSCN1	Fascin
Q9BXM9	FSD1L	FSD1-like protein
Q8IY81	FTSJ3	pre-rRNA processing protein FTSJ3
Q96AE4	FUBP1	Far upstream element-binding protein 1
P09958	FURIN	Furin
P35637	FUS	RNA-binding protein FUS
Q495W5	FUT11	Alpha-(1,3)-fucosyltransferase 11
Q9UN86	G3BP2	Ras GTPase-activating protein-binding protein 2
P04406	GAPDH	Glyceraldehyde-3-phosphate dehydrogenase
P28676	GCA	Grancalcin
O75600	GCAT	2-amino-3-ketobutyrate coenzyme A ligase, mitochondrial
Q8IWJ2	GCC2	GRIP and coiled-coil domain-containing protein 2
P31150	GDI1	Rab GDP dissociation inhibitor alpha
P50395	GDI2	Rab GDP dissociation inhibitor beta
Q92820	GGH	Gamma-glutamyl hydrolase
P01241	GH1	Somatotropin
Q9Y2X7	GIT1	ARF GTPase-activating protein GIT1
P23378	GLDC	Glycine dehydrogenase (decarboxylating), mitochondrial
O76003	GLRX3	Glutaredoxin-3
P04899	GNAI2	Guanine nucleotide-binding protein G(i) subunit alpha-2
P09471	GNAO1	Guanine nucleotide-binding protein G(o) subunit alpha
P00505	GOT2	Aspartate aminotransferase, mitochondrial
Q9HCL2	GPAM	Glycerol-3-phosphate acyltransferase 1, mitochondrial
Q9BRR8	GPATCH1	G patch domain-containing protein 1
Q9NQX3	GPHN	Gephyrin
P06744	GPI	Glucose-6-phosphate isomerase
P24298	GPT	Alanine aminotransferase 1
Q8TD30	GPT2	Alanine aminotransferase 2
P42262	GRIA2	Glutamate receptor 2
P48058	GRIA4	Glutamate receptor 4
Q13002	GRIK2	Glutamate receptor ionotropic, kainate 2
P49840	GSK3A	Glycogen synthase kinase-3 alpha
P49841	GSK3B	Glycogen synthase kinase-3 beta
P09488	GSTM1	Glutathione S-transferase Mu 1
Q9BZE4	GTPBP4	Nucleolar GTP-binding protein 1
P07305	H1F0	Histone H1.0
P51610	HCFC1	Host cell factor 1
Q13547	HDAC1	Histone deacetylase 1
Q00341	HDLBP	Vigilin
Q9P2D3	HEATR5B	HEAT repeat-containing protein 5B
Q9Y4D8	HECTD4	Probable E3 ubiquitin-protein ligase HECTD4
O14964	HGS	Hepatocyte growth factor-regulated tyrosine kinase substrate
P31937	HIBADH	3-hydroxyisobutyrate dehydrogenase, mitochondrial
Q6NVY1	HIBCH	3-hydroxyisobutyryl-CoA hydrolase, mitochondrial
P16401	HIST1H1B	Histone H1.5
P16402	HIST1H1D	Histone H1.3
P06899	HIST1H2BJ	Histone H2B type 1-J
P62805	HIST1H4A	Histone H4
Q5QNW6	HIST2H2BF	Histone H2B type 2-F
P19367	HK1	Hexokinase-1
P52789	HK2	Hexokinase-2
Q01581	HMGCS1	Hydroxymethylglutaryl-CoA synthase, cytoplasmic
P54868	HMGCS2	Hydroxymethylglutaryl-CoA synthase, mitochondrial
Q9UK76	HN1	Hematological and neurological expressed 1 protein
P20823	HNF1A	Hepatocyte nuclear factor 1-alpha
P09651	HNRNPA1	Heterogeneous nuclear ribonucleoprotein A1
P22626	HNRNPA2B1	Heterogeneous nuclear ribonucleoproteins A2/B1
P51991	HNRNPA3	Heterogeneous nuclear ribonucleoprotein A3
Q99729	HNRNPAB	Heterogeneous nuclear ribonucleoprotein A/B
P07910	HNRNPC	Heterogeneous nuclear ribonucleoproteins C1/C2
Q14103	HNRNPD	Heterogeneous nuclear ribonucleoprotein D0
O14979	HNRNPDL	Heterogeneous nuclear ribonucleoprotein D-like
P31943	HNRNPH1	Heterogeneous nuclear ribonucleoprotein H
P55795	HNRNPH2	Heterogeneous nuclear ribonucleoprotein H2
P31942	HNRNPH3	Heterogeneous nuclear ribonucleoprotein H3
P61978	HNRNPK	Heterogeneous nuclear ribonucleoprotein K
P14866	HNRNPL	Heterogeneous nuclear ribonucleoprotein L
P52272	HNRNPM	Heterogeneous nuclear ribonucleoprotein M
O43390	HNRNPR	Heterogeneous nuclear ribonucleoprotein R
Q00839	HNRNPU	Heterogeneous nuclear ribonucleoprotein U
H3BQZ7	HNRNPUL2-BSCL2	HCG2044799
Q86VS8	HOOK3	Protein Hook homolog 3
Q9UM19	HPCAL4	Hippocalcin-like protein 4
Q53T59	HS1BP3	HCLS1-binding protein 3
O75506	HSBP1	Heat shock factor-binding protein 1
P07900	HSP90AA1	Heat shock protein HSP 90-alpha
P08238	HSP90AB1	Heat shock protein HSP 90-beta
P14625	HSP90B1	Endoplasmin
P0DMV8	HSPA1A	Heat shock 70 kDa protein 1A
P34931	HSPA1L	Heat shock 70 kDa protein 1-like
P34932	HSPA4	Heat shock 70 kDa protein 4
P11021	HSPA5	78 kDa glucose-regulated protein
P11142	HSPA8	Heat shock cognate 71 kDa protein
P38646	HSPA9	Stress-70 protein, mitochondrial
P10809	HSPD1	60 kDa heat shock protein, mitochondrial
Q9Y4L1	HYOU1	Hypoxia up-regulated protein 1
Q0D2I5	IFFO1	Intermediate filament family orphan 1
O00425	IGF2BP3	Insulin-like growth factor 2 mRNA-binding protein 3
O75054	IGSF3	Immunoglobulin superfamily member 3
Q969P0	IGSF8	Immunoglobulin superfamily member 8
Q12905	ILF2	Interleukin enhancer-binding factor 2
Q12906	ILF3	Interleukin enhancer-binding factor 3
Q13418	ILK	Integrin-linked protein kinase
Q16352	INA	Alpha-internexin
P49441	INPP1	Inositol polyphosphate 1-phosphatase
O00410	IPO5	Importin-5
P26440	IVD	Isovaleryl-CoA dehydrogenase, mitochondrial
Q96ST2	IWS1	Protein IWS1 homolog
Q9NZI2	KCNIP1	Kv channel-interacting protein 1
Q9NS61	KCNIP2	Kv channel-interacting protein 2
P29375	KDM5A	Lysine-specific demethylase 5A
Q07666	KHDRBS1	KH domain-containing, RNA-binding, signal transduction-associated protein 1
Q92945	KHSRP	Far upstream element-binding protein 2
A0MZ66	KIAA1598	Shootin-1
Q12756	KIF1A	Kinesin-like protein KIF1A
O60333	KIF1B	Kinesin-like protein KIF1B
Q96EK5	KIF1BP	KIF1-binding protein
O43896	KIF1C	Kinesin-like protein KIF1C
O00139	KIF2A	Kinesin-like protein KIF2A
P33176	KIF5B	Kinesin-1 heavy chain
O60282	KIF5C	Kinesin heavy chain isoform 5C
Q07866	KLC1	Kinesin light chain 1
Q6TDP4	KLHL17	Kelch-like protein 17
O60684	KPNA6	Importin subunit alpha-7
Q14974	KPNB1	Importin subunit beta-1
Q99456	KRT12	Keratin, type I cytoskeletal 12
P02533	KRT14	Keratin, type I cytoskeletal 14
Q04695	KRT17	Keratin, type I cytoskeletal 17
P05783	KRT18	Keratin, type I cytoskeletal 18
P08727	KRT19	Keratin, type I cytoskeletal 19
P08729	KRT7	Keratin, type II cytoskeletal 7
O95678	KRT75	Keratin, type II cytoskeletal 75
P05787	KRT8	Keratin, type II cytoskeletal 8
Q8IVT5	KSR1	Kinase suppressor of Ras 1
P32004	L1CAM	Neural cell adhesion molecule L1
P07942	LAMB1	Laminin subunit beta-1
Q0VGL1	LAMTOR4	Ragulator complex protein LAMTOR4
Q9P2J5	LARS	Leucine--tRNA ligase, cytoplasmic
Q14847	LASP1	LIM and SH3 domain protein 1
Q53QV2	LBH	Protein LBH
Q9UIC8	LCMT1	Leucine carboxyl methyltransferase 1
Q86U70	LDB1	LIM domain-binding protein 1
Q99538	LGMN	Legumain
O43766	LIAS	Lipoyl synthase, mitochondrial
P49916	LIG3	DNA ligase 3
Q9BRT6	LLPH	Protein LLP homolog
P20700	LMNB1	Lamin-B1
Q03252	LMNB2	Lamin-B2
P36776	LONP1	Lon protease homolog, mitochondrial
Q6UXM1	LRIG3	Leucine-rich repeats and immunoglobulin-like domains protein 3
Q5JTD7	LRRC73	Leucine-rich repeat-containing protein 73
Q9H3W5	LRRN3	Leucine-rich repeat neuronal protein 3
P51884	LUM	Lumican
P78559	MAP1A	Microtubule-associated protein 1A
P11137	MAP2	Microtubule-associated protein 2
P45985	MAP2K4	Dual specificity mitogen-activated protein kinase kinase 4
O14733	MAP2K7	Dual specificity mitogen-activated protein kinase kinase 7
Q96JE9	MAP6	Microtubule-associated protein 6
P28482	MAPK1	Mitogen-activated protein kinase 1
Q16539	MAPK14	Mitogen-activated protein kinase 14
Q9UQF2	MAPK8IP1	C-Jun-amino-terminal kinase-interacting protein 1
Q9UPT6	MAPK8IP3	C-Jun-amino-terminal kinase-interacting protein 3
P31153	MAT2A	S-adenosylmethionine synthase isoform type-2
P43243	MATR3	Matrin-3
Q9UIS9	MBD1	Methyl-CpG-binding domain protein 1
O95983	MBD3	Methyl-CpG-binding domain protein 3
P49736	MCM2	DNA replication licensing factor MCM2
P33991	MCM4	DNA replication licensing factor MCM4
P33993	MCM7	DNA replication licensing factor MCM7
Q8NEM0	MCPH1	Microcephalin
P40925	MDH1	Malate dehydrogenase, cytoplasmic
P40926	MDH2	Malate dehydrogenase, mitochondrial
Q9HAF1	MEAF6	Chromatin modification-related protein MEAF6
Q15648	MED1	Mediator of RNA polymerase II transcription subunit 1
Q93074	MED12	Mediator of RNA polymerase II transcription subunit 12
O00255	MEN1	Menin
P50579	METAP2	Methionine aminopeptidase 2
Q9GZY8	MFF	Mitochondrial fission factor
O60291	MGRN1	E3 ubiquitin-protein ligase MGRN1
Q9BPX6	MICU1	Calcium uptake protein 1, mitochondrial
O15344	MID1	E3 ubiquitin-protein ligase Midline-1
Q8N108	MIER1	Mesoderm induction early response protein 1
P46013	MKI67	Antigen KI-67
O00566	MPHOSPH10	U3 small nucleolar ribonucleoprotein protein MPP10
Q14168	MPP2	MAGUK p55 subfamily member 2
Q6WCQ1	MPRIP	Myosin phosphatase Rho-interacting protein
Q9UKD2	MRTO4	mRNA turnover protein 4 homolog
O43347	MSI1	RNA-binding protein Musashi homolog 1
Q96DH6	MSI2	RNA-binding protein Musashi homolog 2
P11586	MTHFD1	C-1-tetrahydrofolate synthase, cytoplasmic
Q9Y216	MTMR7	Myotubularin-related protein 7
Q9H7P6	MVB12B	Multivesicular body subunit 12B
Q9P2K5	MYEF2	Myelin expression factor 2
P35580	MYH10	Myosin-10
Q7Z406	MYH14	Myosin-14
P35579	MYH9	Myosin-9
P60660	MYL6	Myosin light polypeptide 6
Q01538	MYT1	Myelin transcription factor 1
E9PAV3	NACA	Nascent polypeptide-associated complex subunit alpha, muscle-specific form
Q99733	NAP1L4	Nucleosome assembly protein 1-like 4
P54920	NAPA	Alpha-soluble NSF attachment protein
Q9H115	NAPB	Beta-soluble NSF attachment protein
O43776	NARS	Asparagine--tRNA ligase, cytoplasmic
P18440	NAT1	Arylamine N-acetyltransferase 1
Q8NFP9	NBEA	Neurobeachin
P61601	NCALD	Neurocalcin-delta
P13591	NCAM1	Neural cell adhesion molecule 1
Q15021	NCAPD2	Condensin complex subunit 1
Q9Y2A7	NCKAP1	Nck-associated protein 1
P55160	NCKAP1L	Nck-associated protein 1-like
P19338	NCL	Nucleolin
Q9Y6Q9	NCOA3	Nuclear receptor coactivator 3
Q9HCD5	NCOA5	Nuclear receptor coactivator 5
Q9ULP0	NDRG4	Protein NDRG4
O95139	NDUFB6	NADH dehydrogenase [ubiquinone] 1 beta subcomplex subunit 6
P19404	NDUFV2	NADH dehydrogenase [ubiquinone] flavoprotein 2, mitochondrial
P12036	NEFH	Neurofilament heavy polypeptide
P07196	NEFL	Neurofilament light polypeptide
P07197	NEFM	Neurofilament medium polypeptide
P48681	NES	Nestin
O94856	NFASC	Neurofascin
P23511	NFYA	Nuclear transcription factor Y subunit alpha
Q6KC79	NIPBL	Nipped-B-like protein
Q96D46	NMD3	60S ribosomal export protein NMD3
P30419	NMT1	Glycylpeptide N-tetradecanoyltransferase 1
O60551	NMT2	Glycylpeptide N-tetradecanoyltransferase 2
Q13423	NNT	NAD(P) transhydrogenase, mitochondrial
O94818	NOL4	Nucleolar protein 4
Q15233	NONO	Non-POU domain-containing octamer-binding protein
O00567	NOP56	Nucleolar protein 56
Q9UM47	NOTCH3	Neurogenic locus notch homolog protein 3
O95502	NPTXR	Neuronal pentraxin receptor
Q9P2S2	NRXN2	Neurexin-2
Q9Y4C0	NRXN3	Neurexin-3
P46459	NSF	Vesicle-fusing ATPase
Q9H0G5	NSRP1	Nuclear speckle splicing regulatory protein 1
Q969T7	NT5C3B	7-methylguanosine phosphate-specific 5'-nucleotidase
P57740	NUP107	Nuclear pore complex protein Nup107
Q92621	NUP205	Nuclear pore complex protein Nup205
P52948	NUP98	Nuclear pore complex protein Nup98-Nup96
P55809	OXCT1	Succinyl-CoA:3-ketoacid coenzyme A transferase 1, mitochondrial
P07237	P4HB	Protein disulfide-isomerase
Q9NXG6	P4HTM	Transmembrane prolyl 4-hydroxylase
P11940	PABPC1	Polyadenylate-binding protein 1
Q13310	PABPC4	Polyadenylate-binding protein 4
Q13153	PAK1	Serine/threonine-protein kinase PAK 1
O75914	PAK3	Serine/threonine-protein kinase PAK 3
O43252	PAPSS1	Bifunctional 3'-phosphoadenosine 5'-phosphosulfate synthase 1
O95340	PAPSS2	Bifunctional 3'-phosphoadenosine 5'-phosphosulfate synthase 2
P09874	PARP1	Poly [ADP-ribose] polymerase 1
Q460N5	PARP14	Poly [ADP-ribose] polymerase 14
Q86U86	PBRM1	Protein polybromo-1
P40424	PBX1	Pre-B-cell leukemia transcription factor 1
P40425	PBX2	Pre-B-cell leukemia transcription factor 2
P11498	PC	Pyruvate carboxylase, mitochondrial
Q15366	PCBP2	Poly(rC)-binding protein 2
P57721	PCBP3	Poly(rC)-binding protein 3
P05165	PCCA	Propionyl-CoA carboxylase alpha chain, mitochondrial
Q8TAB3	PCDH19	Protocadherin-19
O60245	PCDH7	Protocadherin-7
Q9Y5H0	PCDHGA3	Protocadherin gamma-A3
Q9UN70	PCDHGC3	Protocadherin gamma-C3
Q9Y5F6	PCDHGC5	Protocadherin gamma-C5
Q15154	PCM1	Pericentriolar material 1 protein
P22061	PCMT1	Protein-L-isoaspartate(D-aspartate) O-methyltransferase
P12004	PCNA	Proliferating cell nuclear antigen
Q53EL6	PDCD4	Programmed cell death protein 4
O14737	PDCD5	Programmed cell death protein 5
Q01064	PDE1B	Calcium/calmodulin-dependent 3',5'-cyclic nucleotide phosphodiesterase 1B
O76074	PDE5A	cGMP-specific 3',5'-cyclic phosphodiesterase
P11177	PDHB	Pyruvate dehydrogenase E1 component subunit beta, mitochondrial
P30101	PDIA3	Protein disulfide-isomerase A3
Q15084	PDIA6	Protein disulfide-isomerase A6
O15018	PDZD2	PDZ domain-containing protein 2
Q15121	PEA15	Astrocytic phosphoprotein PEA-15
Q9UHV9	PFDN2	Prefoldin subunit 2
Q01813	PFKP	ATP-dependent 6-phosphofructokinase, platelet type
P35080	PFN2	Profilin-2
P18669	PGAM1	Phosphoglycerate mutase 1
P15259	PGAM2	Phosphoglycerate mutase 2
P00558	PGK1	Phosphoglycerate kinase 1
P42356	PI4KA	Phosphatidylinositol 4-kinase alpha
Q969N2	PIGT	GPI transamidase component PIG-T
P78356	PIP4K2B	Phosphatidylinositol 5-phosphate 4-kinase type-2 beta
Q99755	PIP5K1A	Phosphatidylinositol 4-phosphate 5-kinase type-1 alpha
O14986	PIP5K1B	Phosphatidylinositol 4-phosphate 5-kinase type-1 beta
P30613	PKLR	Pyruvate kinase PKLR
P14618	PKM	Pyruvate kinase PKM
Q9NQ66	PLCB1	1-phosphatidylinositol 4,5-bisphosphate phosphodiesterase beta-1
Q15147	PLCB4	1-phosphatidylinositol 4,5-bisphosphate phosphodiesterase beta-4
O94827	PLEKHG5	Pleckstrin homology domain-containing family G member 5
Q9UIW2	PLXNA1	Plexin-A1
P02689	PMP2	Myelin P2 protein
Q6P2M8	PNCK	Calcium/calmodulin-dependent protein kinase type 1B
Q7Z3K3	POGZ	Pogo transposable element with ZNF domain
Q9NRF9	POLE3	DNA polymerase epsilon subunit 3
P01189	POMC	Pro-opiomelanocortin
P16435	POR	NADPH--cytochrome P450 reductase
Q15181	PPA1	Inorganic pyrophosphatase
O75145	PPFIA3	Liprin-alpha-3
P23284	PPIB	Peptidyl-prolyl cis-trans isomerase B
P30405	PPIF	Peptidyl-prolyl cis-trans isomerase F, mitochondrial
O15355	PPM1G	Protein phosphatase 1G
P62140	PPP1CB	Serine/threonine-protein phosphatase PP1-beta catalytic subunit
O14974	PPP1R12A	Protein phosphatase 1 regulatory subunit 12A
Q96A00	PPP1R14A	Protein phosphatase 1 regulatory subunit 14A
Q9ULJ8	PPP1R9A	Neurabin-1
P30153	PPP2R1A	Serine/threonine-protein phosphatase 2A 65 kDa regulatory subunit A alpha isoform
P30154	PPP2R1B	Serine/threonine-protein phosphatase 2A 65 kDa regulatory subunit A beta isoform
Q9Y478	PRKAB1	5'-AMP-activated protein kinase subunit beta-1
P13861	PRKAR2A	cAMP-dependent protein kinase type II-alpha regulatory subunit
P31323	PRKAR2B	cAMP-dependent protein kinase type II-beta regulatory subunit
P04156	PRNP	Major prion protein
O75400	PRPF40A	Pre-mRNA-processing factor 40 homolog A
Q13523	PRPF4B	Serine/threonine-protein kinase PRP4 homolog
Q9Y520	PRRC2C	Protein PRRC2C
Q9Y617	PSAT1	Phosphoserine aminotransferase
O14818	PSMA7	Proteasome subunit alpha type-7
P62191	PSMC1	26S protease regulatory subunit 4
P35998	PSMC2	26S protease regulatory subunit 7
P43686	PSMC4	26S protease regulatory subunit 6B
P62333	PSMC6	26S protease regulatory subunit 10B
Q99460	PSMD1	26S proteasome non-ATPase regulatory subunit 1
Q9UNM6	PSMD13	26S proteasome non-ATPase regulatory subunit 13
O00487	PSMD14	26S proteasome non-ATPase regulatory subunit 14
Q13200	PSMD2	26S proteasome non-ATPase regulatory subunit 2
Q8WXF1	PSPC1	Paraspeckle component 1
P41222	PTGDS	Prostaglandin-H2 D-isomerase
P35354	PTGS2	Prostaglandin G/H synthase 2
P43378	PTPN9	Tyrosine-protein phosphatase non-receptor type 9
P23468	PTPRD	Receptor-type tyrosine-protein phosphatase delta
P10586	PTPRF	Receptor-type tyrosine-protein phosphatase F
Q16849	PTPRN	Receptor-type tyrosine-protein phosphatase-like N
Q13332	PTPRS	Receptor-type tyrosine-protein phosphatase S
Q9UHX1	PUF60	Poly(U)-binding-splicing factor PUF60
Q14671	PUM1	Pumilio homolog 1
Q96QR8	PURB	Transcriptional activator protein Pur-beta
Q9BZE2	PUS3	tRNA pseudouridine(38/39) synthase
Q96NY8	PVRL4	Nectin-4
Q13610	PWP1	Periodic tryptophan protein 1 homolog
P51153	RAB13	Ras-related protein Rab-13
P62820	RAB1A	Ras-related protein Rab-1A
P20336	RAB3A	Ras-related protein Rab-3A
Q5JT25	RAB41	Ras-related protein Rab-41
Q86YS6	RAB43	Ras-related protein Rab-43
P20339	RAB5A	Ras-related protein Rab-5A
P61020	RAB5B	Ras-related protein Rab-5B
P51148	RAB5C	Ras-related protein Rab-5C
P20340	RAB6A	Ras-related protein Rab-6A
Q9NRW1	RAB6B	Ras-related protein Rab-6B
Q9Y3P9	RABGAP1	Rab GTPase-activating protein 1
P63000	RAC1	Ras-related C3 botulinum toxin substrate 1
P60763	RAC3	Ras-related C3 botulinum toxin substrate 3
O60216	RAD21	Double-strand-break repair protein rad21 homolog
P62834	RAP1A	Ras-related protein Rap-1A
P52306	RAP1GDS1	Rap1 GTPase-GDP dissociation stimulator 1
P10114	RAP2A	Ras-related protein Rap-2a
P61225	RAP2B	Ras-related protein Rap-2b
Q9Y3L5	RAP2C	Ras-related protein Rap-2c
Q9Y4G8	RAPGEF2	Rap guanine nucleotide exchange factor 2
Q96PK6	RBM14	RNA-binding protein 14
Q96I25	RBM17	Splicing factor 45
P52756	RBM5	RNA-binding protein 5
P29558	RBMS1	RNA-binding motif, single-stranded-interacting protein 1
Q15434	RBMS2	RNA-binding motif, single-stranded-interacting protein 2
O94761	RECQL4	ATP-dependent DNA helicase Q4
Q2KHR2	RFX7	DNA-binding protein RFX7
O15034	RIMBP2	RIMS-binding protein 2
Q9ULI2	RIMKLB	Beta-citrylglutamate synthase B
Q9UQ26	RIMS2	Regulating synaptic membrane exocytosis protein 2
O14730	RIOK3	Serine/threonine-protein kinase RIO3
Q9Y508	RNF114	E3 ubiquitin-protein ligase RNF114
O43567	RNF13	E3 ubiquitin-protein ligase RNF13
O75150	RNF40	E3 ubiquitin-protein ligase BRE1B
Q9HCK4	ROBO2	Roundabout homolog 2
O75695	RP2	Protein XRP2
Q68CZ1	RPGRIP1L	Protein fantom
Q07020	RPL18	60S ribosomal protein L18
P46778	RPL21	60S ribosomal protein L21
P83731	RPL24	60S ribosomal protein L24
Q9Y3U8	RPL36	60S ribosomal protein L36
P25398	RPS12	40S ribosomal protein S12
P62841	RPS15	40S ribosomal protein S15
P08708	RPS17	40S ribosomal protein S17
P63220	RPS21	40S ribosomal protein S21
P23443	RPS6KB1	Ribosomal protein S6 kinase beta-1
Q5JTH9	RRP12	RRP12-like protein
Q9Y3A4	RRP7A	Ribosomal RNA-processing protein 7 homolog A
Q9Y3I0	RTCB	tRNA-splicing ligase RtcB homolog
Q16799	RTN1	Reticulon-1
Q9NQC3	RTN4	Reticulon-4
Q7L099	RUFY3	Protein RUFY3
P19793	RXRA	Retinoic acid receptor RXR-alpha
P28702	RXRB	Retinoic acid receptor RXR-beta
Q9UBE0	SAE1	SUMO-activating enzyme subunit 1
Q9NR31	SAR1A	GTP-binding protein SAR1a
P49591	SARS	Serine--tRNA ligase, cytoplasmic
O43290	SART1	U4/U6.U5 tri-snRNP-associated protein 1
Q15020	SART3	Squamous cell carcinoma antigen recognized by T-cells 3
O95248	SBF1	Myotubularin-related protein 5
P13521	SCG2	Secretogranin-2
Q8WXD2	SCG3	Secretogranin-3
Q9UIL1	SCOC	Short coiled-coil protein
Q9UGP8	SEC63	Translocation protein SEC63 homolog
Q93073	SECISBP2L	Selenocysteine insertion sequence-binding protein 2-like
Q9H2E6	SEMA6A	Semaphorin-6A
P49903	SEPHS1	Selenide, water dikinase 1
Q99611	SEPHS2	Selenide, water dikinase 2
Q16181	SEPT7	Septin-7
Q9UHD8	SEPT9	Septin-9
P07093	SERPINE2	Glia-derived nexin
Q99574	SERPINI1	Neuroserpin
Q12874	SF3A3	Splicing factor 3A subunit 3
Q13435	SF3B2	Splicing factor 3B subunit 2
P23246	SFPQ	Splicing factor, proline- and glutamine-rich
Q99962	SH3GL2	Endophilin-A1
Q96B97	SH3KBP1	SH3 domain-containing kinase-binding protein 1
Q9UPX8	SHANK2	SH3 and multiple ankyrin repeat domains protein 2
P34897	SHMT2	Serine hydroxymethyltransferase, mitochondrial
O75182	SIN3B	Paired amphipathic helix protein Sin3b
Q96EB6	SIRT1	NAD-dependent protein deacetylase sirtuin-1
P42285	SKIV2L2	Superkiller viralicidic activity 2-like 2
Q9UHW9	SLC12A6	Solute carrier family 12 member 6
Q9P2U8	SLC17A6	Vesicular glutamate transporter 2
Q9P2U7	SLC17A7	Vesicular glutamate transporter 1
P41440	SLC19A1	Folate transporter 1
P43003	SLC1A3	Excitatory amino acid transporter 1
P11166	SLC2A1	Solute carrier family 2, facilitated glucose transporter member 1
Q99624	SLC38A3	Sodium-coupled neutral amino acid transporter 3
Q8IZM9	SLC38A6	Probable sodium-coupled neutral amino acid transporter 6
P08195	SLC3A2	4F2 cell-surface antigen heavy chain
P23975	SLC6A2	Sodium-dependent noradrenaline transporter
P52569	SLC7A2	Cationic amino acid transporter 2
Q8WY07	SLC7A3	Cationic amino acid transporter 3
O75093	SLIT1	Slit homolog 1 protein
Q8WU79	SMAP2	Stromal membrane-associated protein 2
Q12824	SMARCB1	SWI/SNF-related matrix-associated actin-dependent regulator of chromatin subfamily B member 1
Q92922	SMARCC1	SWI/SNF complex subunit SMARCC1
Q8TAQ2	SMARCC2	SWI/SNF complex subunit SMARCC2
Q96GM5	SMARCD1	SWI/SNF-related matrix-associated actin-dependent regulator of chromatin subfamily D member 1
Q92925	SMARCD2	SWI/SNF-related matrix-associated actin-dependent regulator of chromatin subfamily D member 2
Q6STE5	SMARCD3	SWI/SNF-related matrix-associated actin-dependent regulator of chromatin subfamily D member 3
Q14683	SMC1A	Structural maintenance of chromosomes protein 1A
Q9UQE7	SMC3	Structural maintenance of chromosomes protein 3
Q9NTJ3	SMC4	Structural maintenance of chromosomes protein 4
Q2TAY7	SMU1	WD40 repeat-containing protein SMU1
P60880	SNAP25	Synaptosomal-associated protein 25
Q9Y6H5	SNCAIP	Synphilin-1
Q16143	SNCB	Beta-synuclein
Q7KZF4	SND1	Staphylococcal nuclease domain-containing protein 1
P08621	SNRNP70	U1 small nuclear ribonucleoprotein 70 kDa
P09012	SNRPA	U1 small nuclear ribonucleoprotein A
P62308	SNRPG	Small nuclear ribonucleoprotein G
Q13573	SNW1	SNW domain-containing protein 1
O00570	SOX1	Transcription factor SOX-1
O60271	SPAG9	C-Jun-amino-terminal kinase-interacting protein 4
Q8NBT2	SPC24	Kinetochore protein Spc24
Q92563	SPOCK2	Testican-2
Q13813	SPTAN1	Spectrin alpha chain, non-erythrocytic 1
Q01082	SPTBN1	Spectrin beta chain, non-erythrocytic 1
O15020	SPTBN2	Spectrin beta chain, non-erythrocytic 2
Q9H254	SPTBN4	Spectrin beta chain, non-erythrocytic 4
Q13501	SQSTM1	Sequestosome-1
Q6ZRS2	SRCAP	Helicase SRCAP
Q9C0H9	SRCIN1	SRC kinase signaling inhibitor 1
Q12772	SREBF2	Sterol regulatory element-binding protein 2
P30626	SRI	Sorcin
Q01130	SRSF2	Serine/arginine-rich splicing factor 2
Q08170	SRSF4	Serine/arginine-rich splicing factor 4
Q16629	SRSF7	Serine/arginine-rich splicing factor 7
P05455	SSB	Lupus La protein
P28290	SSFA2	Sperm-specific antigen 2
A2VEC9	SSPO	SCO-spondin
P50502	ST13	Hsc70-interacting protein
Q8NFI4	ST13P5	Putative protein FAM10A5
O95793	STAU1	Double-stranded RNA-binding protein Staufen homolog 1
P31948	STIP1	Stress-induced-phosphoprotein 1
Q9Y6E0	STK24	Serine/threonine-protein kinase 24
Q13188	STK3	Serine/threonine-protein kinase 3
Q13043	STK4	Serine/threonine-protein kinase 4
P16949	STMN1	Stathmin
Q93045	STMN2	Stathmin-2
Q9UJZ1	STOML2	Stomatin-like protein 2, mitochondrial
Q9P2F5	STOX2	Storkhead-box protein 2
O14662	STX16	Syntaxin-16
Q16623	STX1A	Syntaxin-1A
P61764	STXBP1	Syntaxin-binding protein 1
P53999	SUB1	Activated RNA polymerase II transcriptional coactivator p15
Q7KZ85	SUPT6H	Transcription elongation factor SPT6
Q8N4V2	SVOP	Synaptic vesicle 2-related protein
Q92777	SYN2	Synapsin-2
O43426	SYNJ1	Synaptojanin-1
Q8N3V7	SYNPO	Synaptopodin
P08247	SYP	Synaptophysin
P21579	SYT1	Synaptotagmin-1
Q8N9I0	SYT2	Synaptotagmin-2
Q9HCD6	TANC2	Protein TANC2
Q15369	TCEB1	Transcription elongation factor B polypeptide 1
Q15370	TCEB2	Transcription elongation factor B polypeptide 2
O14776	TCERG1	Transcription elongation regulator 1
Q9NQB0	TCF7L2	Transcription factor 7-like 2
P17987	TCP1	T-complex protein 1 subunit alpha
Q14186	TFDP1	Transcription factor Dp-1
Q14188	TFDP2	Transcription factor Dp-2
Q9UPZ6	THSD7A	Thrombospondin type-1 domain-containing protein 7A
P62072	TIMM10	Mitochondrial import inner membrane translocase subunit Tim10
Q9Y490	TLN1	Talin-1
Q9Y4G6	TLN2	Talin-2
P49755	TMED10	Transmembrane emp24 domain-containing protein 10
Q6ZVM7	TOM1L2	TOM1-like protein 2
Q9NS69	TOMM22	Mitochondrial import receptor subunit TOM22 homolog
Q9P0U1	TOMM7	Mitochondrial import receptor subunit TOM7 homolog
P11388	TOP2A	DNA topoisomerase 2-alpha
Q12888	TP53BP1	Tumor suppressor p53-binding protein 1
P06753	TPM3	Tropomyosin alpha-3 chain
P13693	TPT1	Translationally-controlled tumor protein
Q9ULW0	TPX2	Targeting protein for Xklp2
O43617	TRAPPC3	Trafficking protein particle complex subunit 3
Q86WT6	TRIM69	E3 ubiquitin-protein ligase TRIM69
Q14669	TRIP12	E3 ubiquitin-protein ligase TRIP12
Q8NER1	TRPV1	Transient receptor potential cation channel subfamily V member 1
Q99614	TTC1	Tetratricopeptide repeat protein 1
A0AVF1	TTC26	Intraflagellar transport protein 56
Q9BTX7	TTPAL	Alpha-tocopherol transfer protein-like
Q9C0H2	TTYH3	Protein tweety homolog 3
Q71U36	TUBA1A	Tubulin alpha-1A chain
P68363	TUBA1B	Tubulin alpha-1B chain
P68366	TUBA4A	Tubulin alpha-4A chain
P07437	TUBB	Tubulin beta chain
Q13885	TUBB2A	Tubulin beta-2A chain
Q9BVA1	TUBB2B	Tubulin beta-2B chain
Q13509	TUBB3	Tubulin beta-3 chain
P04350	TUBB4A	Tubulin beta-4A chain
P68371	TUBB4B	Tubulin beta-4B chain
Q9BUF5	TUBB6	Tubulin beta-6 chain
O14530	TXNDC9	Thioredoxin domain-containing protein 9
O43396	TXNL1	Thioredoxin-like protein 1
P26368	U2AF2	Splicing factor U2AF 65 kDa subunit
P22314	UBA1	Ubiquitin-like modifier-activating enzyme 1
Q5T6F2	UBAP2	Ubiquitin-associated protein 2
P60604	UBE2G2	Ubiquitin-conjugating enzyme E2 G2
P61088	UBE2N	Ubiquitin-conjugating enzyme E2 N
Q16763	UBE2S	Ubiquitin-conjugating enzyme E2 S
Q13404	UBE2V1	Ubiquitin-conjugating enzyme E2 variant 1
Q15819	UBE2V2	Ubiquitin-conjugating enzyme E2 variant 2
Q6ZU65	UBN2	Ubinuclein-2
Q6ZT12	UBR3	E3 ubiquitin-protein ligase UBR3
Q5T4S7	UBR4	E3 ubiquitin-protein ligase UBR4
P17480	UBTF	Nucleolar transcription factor 1
Q9UPW8	UNC13A	Protein unc-13 homolog A
O14795	UNC13B	Protein unc-13 homolog B
Q93009	USP7	Ubiquitin carboxyl-terminal hydrolase 7
Q93008	USP9X	Probable ubiquitin carboxyl-terminal hydrolase FAF-X
P23763	VAMP1	Vesicle-associated membrane protein 1
P63027	VAMP2	Vesicle-associated membrane protein 2
Q15836	VAMP3	Vesicle-associated membrane protein 3
Q99536	VAT1	Synaptic vesicle membrane protein VAT-1 homolog
P61758	VBP1	Prefoldin subunit 3
P19320	VCAM1	Vascular cell adhesion protein 1
P18206	VCL	Vinculin
P55072	VCP	Transitional endoplasmic reticulum ATPase
P08670	VIM	Vimentin
Q9BQE4	VIMP	Selenoprotein S
Q96GC9	VMP1	Vacuole membrane protein 1
Q9UK41	VPS28	Vacuolar protein sorting-associated protein 28 homolog
Q9H9H4	VPS37B	Vacuolar protein sorting-associated protein 37B
Q9UN37	VPS4A	Vacuolar protein sorting-associated protein 4A
P62760	VSNL1	Visinin-like protein 1
Q9NP79	VTA1	Vacuolar protein sorting-associated protein VTA1 homolog
Q5JSH3	WDR44	WD repeat-containing protein 44
O94967	WDR47	WD repeat-containing protein 47
Q6UXN9	WDR82	WD repeat-containing protein 82
Q15007	WTAP	Pre-mRNA-splicing regulator WTAP
O00308	WWP2	NEDD4-like E3 ubiquitin-protein ligase WWP2
Q9NQW7	XPNPEP1	Xaa-Pro aminopeptidase 1
P12956	XRCC6	X-ray repair cross-complementing protein 6
Q9H0D6	XRN2	5'-3' exoribonuclease 2
P49750	YLPM1	YLP motif-containing protein 1
Q96TA2	YME1L1	ATP-dependent zinc metalloprotease YME1L1
P31946	YWHAB	14-3-3 protein beta/alpha
P62258	YWHAE	14-3-3 protein epsilon
P61981	YWHAG	14-3-3 protein gamma
Q04917	YWHAH	14-3-3 protein eta
P27348	YWHAQ	14-3-3 protein theta
Q86T24	ZBTB33	Transcriptional regulator Kaiso
Q86UZ6	ZBTB46	Zinc finger and BTB domain-containing protein 46
Q9NUD5	ZCCHC3	Zinc finger CCHC domain-containing protein 3
Q6NZY4	ZCCHC8	Zinc finger CCHC domain-containing protein 8
Q96KR1	ZFR	Zinc finger RNA-binding protein
Q96NC0	ZMAT2	Zinc finger matrin-type protein 2
Q5VZL5	ZMYM4	Zinc finger MYM-type protein 4
O95125	ZNF202	Zinc finger protein 202
O43670	ZNF207	BUB3-interacting and GLEBS motif-containing protein ZNF207
Q5BKZ1	ZNF326	DBIRD complex subunit ZNF326
Q9Y5A6	ZSCAN21	Zinc finger and SCAN domain-containing protein 21
A7E2V4	ZSWIM8	Zinc finger SWIM domain-containing protein 8
