# Supplementary material for: Role of the visual experience-dependent nascent proteome in neuronal plasticity
Source: eLife. 2018 Feb 7;7:e33420. doi: 10.7554/eLife.33420 (PMC5815848; doi:10.7554/eLife.33420)
Supplement: Supplementary file 2. — Related to Table 1. The normalized fold changes visual experience (VE):control (V/C) in AHA labeling from two independent experiments by searching MS/MS spectra against three different databases were listed. The final fold changes in AHA labeling is from the averaged of two independent experiments are also shown in Table 1. CPPs are shaded in red if they increased in both experiments, in pink if increased in one of the experiments, in green if decreased in both experiments, and in light green if decrease in on of the experiments. [file elife-33420-supp2.xlsx]

## Sheet: VE-dependent nascent proteome
			Normalized fold changes VE:control (V/C)								Final Fold Change
	Gene names	Uniprot_ID	Ve		xenbase		phrog		Average of three databases		Average of two experiments
			Experiment#1	Experiment#2	Experiment#1	Experiment#2	Experiment#1	Experiment#2	Experiment#1	Experiment#2
Up in two experiments	capza1	P52907	1.22167	1.50621	1.22167	1.50621	1.22167	1.50621	1.22167	1.50621	1.36394
	capza2	P47755	1.364	1.30157	1.364	1.30157	1.364	1.30157	1.364	1.30157	1.33278
	cbx1	P83916	1.21339	1.50912	1.21339	1.50912	1.17671	1.50912	1.20116	1.50912	1.35514
	cbx3	Q13185	1.21339	1.50912	1.21339	1.50912	1.17671	1.50912	1.20116	1.50912	1.35514
	fus	P35637	1.2997	1.42144	1.2997	1.42144	1.2997	1.42144	1.2997	1.42144	1.36057
	hdlbp	Q00341	1.2878	1.2259	1.2878	1.2259	1.2878	1.2259	1.2878	1.2259	1.25685
	rps17	P08708	1.38897	2.05324	1.33963	2.05324	1.38897	2.05324	1.37252	2.05324	1.71288
	tuba1b	P68363	1.31062	2.58231			1.31062	2.58231	1.31062	2.58231	1.94646
	lonp1	P36776					1.25106	1.37628	1.25106	1.37628	1.31367
	sfpq	P23246					1.70445	1.38371	1.70445	1.38371	1.54408
	ttpal	Q9BTX7					1.22566	1.61106	1.22566	1.61106	1.41836
	tuba1a	Q71U36					1.31062	2.58231	1.31062	2.58231	1.94646
Up in one experiment	cox5a	P20674	1.55877	1.03129	1.55877	1.03129	1.55877	1.03129	1.55877	1.03129	1.29503
	eif3a	Q14152	1.06054	1.24959	1.06054	1.24959	1.06054	1.24959	1.06054	1.24959	1.15507
	krt75	O95678	1.26351	1.07631	1.26351	1.07631	1.26351	1.07631	1.26351	1.07631	1.16991
	metap2	P50579	1.36182	1.07551	1.36182	1.07551	1.36182	1.07551	1.36182	1.07551	1.21867
	naca	Q13765	1.19959	1.55903	1.19959	1.55903	1.19959	1.55903	1.19959	1.55903	1.37931
	nono	Q15233	1.22209	1.08419	1.22209	1.08419	1.22209	1.08419	1.22209	1.08419	1.15314
	psmd2	Q13200	1.7083	1.09117	1.7083	1.09117	1.7083	1.09117	1.7083	1.09117	1.39974
	rab5a	P20339	1.26872	1.01992	1.26872	1.01992	1.26872	1.01992	1.26872	1.01992	1.14432
	rab5c	P51148	1.26872	1.01992	1.26872	1.01992	1.26872	1.01992	1.26872	1.01992	1.14432
	eif4a1	P60842	1.03592	1.3334	1.03592	1.3334			1.03592	1.3334	1.18466
	hnrnpab	Q99729	1.3806	1.04082	1.3806	1.04082			1.3806	1.04082	1.21071
	pbrm1	Q86U86	1.53625	1.18367			1.53625	1.18367	1.53625	1.18367	1.35996
	rab5b	P61020	1.18266	1.2264			1.18266	1.2264	1.18266	1.2264	1.20453
	skiv2l2	P42285	1.40724	1.08985			1.40724	1.08985	1.40724	1.08985	1.24855
	ap2a2	O94973			1.03733	1.26689	1.03733	1.26689	1.03733	1.26689	1.15211
	iws1	Q96ST2			1.30914	1.1956	1.30914	1.1956	1.30914	1.1956	1.25237
	vim	P08670			1.29606	1.06907	1.30604	1.06907	1.30105	1.06907	1.18506
	nsrp1	Q9H0G5			1.53625	1.18367			1.53625	1.18367	1.35996
	syp	P08247			1.22143	1.11205			1.22143	1.11205	1.16674
	cxxc4	Q9H2H0					1.04421	1.89961	1.04421	1.89961	1.47191
	dpysl3	Q14195					1.33556	1.05008	1.33556	1.05008	1.19282
	fasn	P49327					1.17914	1.27716	1.17914	1.27716	1.22815
	kiaa1598	A0MZ66					1.30168	1.01703	1.30168	1.01703	1.15936
	krt7	P08729					1.26351	1.07631	1.26351	1.07631	1.16991
	lgmn	Q99538					2.00383	1.09923	2.00383	1.09923	1.55153
	sptbn1	Q01082					1.20372	1.15803	1.20372	1.15803	1.18087
Down in two experiments	cct7	Q99832	0.31835	0.48926	0.31835	0.48926	0.31835	0.48926	0.31835	0.48926	0.403805
	clasp1	Q7Z460	0.83235	0.68756	0.74932	0.6539	0.83235	0.68756	0.804673	0.67634	0.740507
	col18a1	P39060	0.67108	0.7487	0.67108	0.7487	0.67108	0.7487	0.67108	0.7487	0.70989
	ctnnb1	P35222	0.666155	0.64955	0.58776	0.64955	0.58776	0.64955	0.613892	0.64955	0.631721
	papss1	O43252	0.59211	0.75441	0.59211	0.75441	0.59211	0.75441	0.59211	0.75441	0.67326
	psmc6	P62333	0.70847	0.78571	0.736395	0.78571	0.70847	0.78571	0.717778	0.78571	0.751744
	tln1	Q9Y490	0.67613	0.74311			0.67613	0.74311	0.67613	0.74311	0.70962
	atp2a2	P16615	0.73016	0.59867					0.73016	0.59867	0.664415
	pmp2	P02689	0.31053	0.77968					0.31053	0.77968	0.545105
	acta1	P68133			0.74036	0.59568	0.74036	0.8604	0.74036	0.72804	0.7342
	atp2a1	O14983			0.73016	0.59867	0.73016	0.59867	0.73016	0.59867	0.664415
	kif1a	Q12756					0.54257	0.76628	0.54257	0.76628	0.654425
Down in one experiment	actb	P60709	0.73614	0.8803	0.6348	0.88704	0.68758	0.87035	0.686173	0.87923	0.782702
	aplp2	Q06481	0.56347	0.91641	0.56347	0.91641	0.56347	0.91641	0.56347	0.91641	0.73994
	cand1	Q86VP6	0.8807	0.78017	0.8807	0.78017	0.8807	0.78017	0.8807	0.78017	0.830435
	dnm1l	O00429	0.70127	0.86424	0.70127	0.86424	0.70127	0.86424	0.70127	0.86424	0.782755
	hist1h4a	P62805	0.93744	0.30777	0.87038	0.30777	0.93744	0.30777	0.915087	0.30777	0.611428
	hnrnpa1	P09651	0.64523	0.97825	0.64523	0.97825	0.64523	0.97825	0.64523	0.97825	0.81174
	hnrnpc	P07910	0.64622	0.87537	0.64622	0.87537	0.64622	0.87537	0.64622	0.87537	0.760795
	hsp90ab1	P08238	0.90921	0.65966	0.90921	0.67442	0.90921	0.67442	0.90921	0.6695	0.789355
	hspa5	P11021	0.99759	0.38518	0.97673	0.38518	0.97673	0.38518	0.983683	0.38518	0.684432
	mdh2	P40926	0.92167	0.57406	0.92167	0.57406	0.92167	0.57406	0.92167	0.57406	0.747865
	ncl	P19338	0.79013	0.82067	0.79013	0.82067	0.79013	0.82067	0.79013	0.82067	0.8054
	pcbp3	P57721	0.32234	0.8708	0.32234	0.8708	0.32234	0.8708	0.32234	0.8708	0.59657
	snw1	Q13573	0.67276	0.83212	0.67276	0.83212			0.67276	0.83212	0.75244
	actg1	P63261	0.73614	0.8803			0.68758	0.87035	0.71186	0.875325	0.793592
	hn1	Q9UK76	0.69547	0.94298			0.69547	0.94298	0.69547	0.94298	0.819225
	kif1b	O60333	0.90594	0.71378			0.90594	0.71378	0.90594	0.71378	0.80986
	pcbp2	Q15366	0.32234	0.8708			0.32234	0.8708	0.32234	0.8708	0.59657
	smc1a	Q14683	0.81911	0.77293					0.81911	0.77293	0.79602
	sptan1	Q13813	0.96054	0.71052					0.96054	0.71052	0.83553
	stip1	P31948	0.92815	0.54692					0.92815	0.54692	0.737535
	trim69	Q86WT6	0.97109	0.44263					0.97109	0.44263	0.70686
	arnt2	Q9HBZ2			0.80656	0.74683	0.80656	0.74683	0.80656	0.74683	0.776695
	cdh11	P55287			0.87156	0.71969	0.87156	0.71969	0.87156	0.71969	0.795625
	hk1	P19367			0.92926	0.6744	0.92926	0.6744	0.92926	0.6744	0.80183
	mcm4	P33991			0.82575	0.6866	0.82575	0.6866	0.82575	0.6866	0.756175
	smarcd2	Q92925			0.88723	0.79925	0.88723	0.79925	0.88723	0.79925	0.84324
	stmn2	Q93045			0.81674	0.59205	0.81674	0.59205	0.81674	0.59205	0.704395
	acta2	P62736					0.74036	0.8604	0.74036	0.8604	0.80038
	actc1	P68032					0.74036	0.8604	0.74036	0.8604	0.80038
	kif1c	O43896					0.90594	0.71378	0.90594	0.71378	0.80986
	kif5c	O60282					0.84006	0.75237	0.84006	0.75237	0.796215
	smarcd1	Q96GM5					0.88723	0.79925	0.88723	0.79925	0.84324
	smarcd3	Q6STE5					0.88723	0.79925	0.88723	0.79925	0.84324
