# Supplementary material for: Role of the visual experience-dependent nascent proteome in neuronal plasticity
Source: eLife. 2018 Feb 7;7:e33420. doi: 10.7554/eLife.33420 (PMC5815848; doi:10.7554/eLife.33420)
Supplement: Supplementary file 3. — Related to Table 1. 83 CPPs are annotated to a variety of cellular compartments, molecular functions, and biological processes by using the PANTHER database. [file elife-33420-supp3.xlsx]

## Sheet: PANTHER_GO annotation
UniProtKB	Gene Name	Gene Symbol	PANTHER Family/Subfamily	PANTHER GO-Slim Molecular Function	PANTHER GO-Slim Biological Process	PANTHER GO-Slim Cellular Component	PANTHER Protein Class	Pathway	GO database MF Complete	GO database BP Complete	GO database CC Complete
P68133	Actin, alpha skeletal muscle	ACTA1	ACTIN, ALPHA SKELETAL MUSCLE (PTHR11937:SF348)	structural constituent of cytoskeleton(GO:0005198)	cellular component morphogenesis(GO:0071840);cytokinesis(GO:0016043);endocytosis(GO:0032989);exocytosis(GO:0009987);intracellular protein transport(GO:0000910);mitosis(GO:0051179)	actin cytoskeleton(GO:0043226);intracellular(GO:0005856)	actin and actin related protein(PC00085)	Alzheimer disease-presenilin pathway->actin;;Integrin signalling pathway->Actin;;Huntington disease->Actin;;Cadherin signaling pathway->Filamentous F-actin;;Wnt signaling pathway->NFAT Target Genes;;Nicotinic acetylcholine receptor signaling pathway->Actin;;Inflammation mediated by chemokine and cytokine signaling pathway->F-actin;;Cytoskeletal regulation by Rho GTPase->Actin;;;;;;;;;	ATP binding(GO:0005524);structural constituent of cytoskeleton(GO:0005200);protein binding(GO:0005515);myosin binding(GO:0017022);ADP binding(GO:0043531);nucleotide binding(GO:0000166)	muscle contraction(GO:0006936);response to mechanical stimulus(GO:0009612);response to extracellular stimulus(GO:0009991);response to lithium ion(GO:0010226);positive regulation of gene expression(GO:0010628);cell growth(GO:0016049);muscle filament sliding(GO:0030049);skeletal muscle thin filament assembly(GO:0030240);skeletal muscle fiber adaptation(GO:0043503);response to steroid hormone(GO:004…	stress fiber(GO:0001725);extracellular space(GO:0005615);cytosol(GO:0005829);striated muscle thin filament(GO:0005865);actin filament(GO:0005884);actin cytoskeleton(GO:0015629);sarcomere(GO:0030017);lamellipodium(GO:0030027);filopodium(GO:0030175);cell body(GO:0044297);extracellular exosome(GO:0070062);blood microparticle(GO:0072562);cytoplasm(GO:0005737);cytoskeleton(GO:0005856)
P62736	Actin, aortic smooth muscle	ACTA2	ACTIN, AORTIC SMOOTH MUSCLE (PTHR11937:SF346)	structural constituent of cytoskeleton(GO:0005198)	cellular component morphogenesis(GO:0071840);cytokinesis(GO:0016043);endocytosis(GO:0032989);exocytosis(GO:0009987);intracellular protein transport(GO:0000910);mitosis(GO:0051179)	actin cytoskeleton(GO:0043226);intracellular(GO:0005856)	actin and actin related protein(PC00085)	Nicotinic acetylcholine receptor signaling pathway->Actin;;Inflammation mediated by chemokine and cytokine signaling pathway->F-actin;;Cytoskeletal regulation by Rho GTPase->Actin;;Huntington disease->Actin;;Cadherin signaling pathway->Filamentous F-actin;;Wnt signaling pathway->NFAT Target Genes;;Alzheimer disease-presenilin pathway->actin;;Integrin signalling pathway->Actin;;;;;;;;;	ATP binding(GO:0005524);protein kinase binding(GO:0019901);nucleotide binding(GO:0000166)	muscle contraction(GO:0006936);regulation of blood pressure(GO:0008217);response to virus(GO:0009615);positive regulation of gene expression(GO:0010628);vascular smooth muscle contraction(GO:0014829);glomerular mesangial cell development(GO:0072144);mesenchyme migration(GO:0090131)	extracellular space(GO:0005615);cytoplasm(GO:0005737);cytosol(GO:0005829);actin cytoskeleton(GO:0015629);lamellipodium(GO:0030027);filopodium(GO:0030175);smooth muscle contractile fiber(GO:0030485);protein complex(GO:0043234);cell body(GO:0044297);extracellular exosome(GO:0070062);cytoskeleton(GO:0005856)
P60709	Actin, cytoplasmic 1	ACTB	ACTIN, CYTOPLASMIC 1 (PTHR11937:SF288)	structural constituent of cytoskeleton(GO:0005198)	cellular component organization(GO:0071840);cytokinesis(GO:0016043);endocytosis(GO:0009987);exocytosis(GO:0000910);intracellular protein transport(GO:0051179);mitosis(GO:0006810)	actin cytoskeleton(GO:0043226);intracellular(GO:0005856)	actin and actin related protein(PC00085)	Cytoskeletal regulation by Rho GTPase->Actin;;Inflammation mediated by chemokine and cytokine signaling pathway->F-actin;;Nicotinic acetylcholine receptor signaling pathway->Actin;;Integrin signalling pathway->Actin;;Alzheimer disease-presenilin pathway->actin;;Wnt signaling pathway->NFAT Target Genes;;Cadherin signaling pathway->Filamentous F-actin;;Huntington disease->Actin;;;;;;;;;	ATP binding(GO:0005524);structural constituent of cytoskeleton(GO:0005200);protein binding(GO:0005515);kinesin binding(GO:0019894);Tat protein binding(GO:0030957);identical protein binding(GO:0042802);nitric-oxide synthase binding(GO:0050998);RNA polymerase II core promoter proximal region sequence-specific DNA binding(GO:0000978);RNA polymerase II distal enhancer sequence-specific DNA binding(GO…	retina homeostasis(GO:0001895);movement of cell or subcellular component(GO:0006928);substantia nigra development(GO:0021762);cell junction assembly(GO:0034329);Fc-gamma receptor signaling pathway involved in phagocytosis(GO:0038096);ATP-dependent chromatin remodeling(GO:0043044);positive regulation of gene expression, epigenetic(GO:0045815);vascular endothelial growth factor receptor signaling p…	nuclear chromatin(GO:0000790);extracellular space(GO:0005615);nucleoplasm(GO:0005654);cytoplasm(GO:0005737);cytosol(GO:0005829);cytoskeleton(GO:0005856);plasma membrane(GO:0005886);focal adhesion(GO:0005925);membrane(GO:0016020);intracellular ribonucleoprotein complex(GO:0030529);NuA4 histone acetyltransferase complex(GO:0035267);cytoplasmic ribonucleoprotein granule(GO:0036464);protein complex(G…
P68032	Actin, alpha cardiac muscle 1	ACTC1	ACTIN, ALPHA CARDIAC MUSCLE 1 (PTHR11937:SF335)	structural constituent of cytoskeleton(GO:0005198)	cellular component morphogenesis(GO:0071840);cytokinesis(GO:0016043);endocytosis(GO:0032989);exocytosis(GO:0009987);intracellular protein transport(GO:0000910);mitosis(GO:0051179)	actin cytoskeleton(GO:0043226);intracellular(GO:0005856)	actin and actin related protein(PC00085)	Inflammation mediated by chemokine and cytokine signaling pathway->F-actin;;Nicotinic acetylcholine receptor signaling pathway->Actin;;Cytoskeletal regulation by Rho GTPase->Actin;;Cadherin signaling pathway->Filamentous F-actin;;Huntington disease->Actin;;Wnt signaling pathway->NFAT Target Genes;;Alzheimer disease-presenilin pathway->actin;;Integrin signalling pathway->Actin;;;;;;;;;	ATP binding(GO:0005524);ATPase activity(GO:0016887);myosin binding(GO:0017022);nucleotide binding(GO:0000166)	apoptotic process(GO:0006915);positive regulation of gene expression(GO:0010628);actin filament-based movement(GO:0030048);muscle filament sliding(GO:0030049);skeletal muscle thin filament assembly(GO:0030240);actomyosin structure organization(GO:0031032);actin-myosin filament sliding(GO:0033275);response to drug(GO:0042493);negative regulation of apoptotic process(GO:0043066);response to ethanol…	extracellular space(GO:0005615);cytoplasm(GO:0005737);cytosol(GO:0005829);actin filament(GO:0005884);focal adhesion(GO:0005925);membrane(GO:0016020);sarcomere(GO:0030017);lamellipodium(GO:0030027);filopodium(GO:0030175);I band(GO:0031674);actomyosin, actin portion(GO:0042643);cell body(GO:0044297);extracellular exosome(GO:0070062);blood microparticle(GO:0072562);cytoskeleton(GO:0005856)
P63261	Actin, cytoplasmic 2	ACTG1	ACTIN, CYTOPLASMIC 2 (PTHR11937:SF267)	structural constituent of cytoskeleton(GO:0005198)	cellular component organization(GO:0071840);cytokinesis(GO:0016043);endocytosis(GO:0009987);exocytosis(GO:0000910);intracellular protein transport(GO:0051179);mitosis(GO:0006810)	actin cytoskeleton(GO:0043226);intracellular(GO:0005856)	actin and actin related protein(PC00085)	Wnt signaling pathway->NFAT Target Genes;;Cadherin signaling pathway->Filamentous F-actin;;Huntington disease->Actin;;Integrin signalling pathway->Actin;;Alzheimer disease-presenilin pathway->actin;;Cytoskeletal regulation by Rho GTPase->Actin;;Inflammation mediated by chemokine and cytokine signaling pathway->F-actin;;Nicotinic acetylcholine receptor signaling pathway->Actin;;;;;;;;;	ATP binding(GO:0005524);structural constituent of cytoskeleton(GO:0005200);protein binding(GO:0005515);ubiquitin protein ligase binding(GO:0031625);identical protein binding(GO:0042802);nucleotide binding(GO:0000166)	retina homeostasis(GO:0001895);movement of cell or subcellular component(GO:0006928);cell junction assembly(GO:0034329);Fc-gamma receptor signaling pathway involved in phagocytosis(GO:0038096);sarcomere organization(GO:0045214);vascular endothelial growth factor receptor signaling pathway(GO:0048010);ephrin receptor signaling pathway(GO:0048013);platelet aggregation(GO:0070527)	extracellular space(GO:0005615);nucleus(GO:0005634);cytosol(GO:0005829);cytoskeleton(GO:0005856);plasma membrane(GO:0005886);focal adhesion(GO:0005925);membrane(GO:0016020);myofibril(GO:0030016);filamentous actin(GO:0031941);myelin sheath(GO:0043209);extracellular exosome(GO:0070062);blood microparticle(GO:0072562);dense body(GO:0097433);cytoplasm(GO:0005737);actin cytoskeleton(GO:0015629);extrac…
O94973	AP-2 complex subunit alpha-2	AP2A2	AP-2 COMPLEX SUBUNIT ALPHA-2 (PTHR22780:SF34)		intracellular protein transport(GO:0051179);receptor-mediated endocytosis(GO:0006810)		transmembrane receptor regulatory/adaptor protein(PC00226)	Huntington disease->alpha-Adaptin;;	protein transporter activity(GO:0008565);molecular_function(GO:0003674);protein binding(GO:0005515);lipid binding(GO:0008289);protein kinase binding(GO:0019901);protein complex binding(GO:0032403);clathrin adaptor activity(GO:0035615)	intracellular protein transport(GO:0006886);vesicle-mediated transport(GO:0016192);microtubule-based movement(GO:0007018);antigen processing and presentation of exogenous peptide antigen via MHC class II(GO:0019886);negative regulation of epidermal growth factor receptor signaling pathway(GO:0042059);ephrin receptor signaling pathway(GO:0048013);regulation of defense response to virus by virus(GO…	membrane coat(GO:0030117);Golgi apparatus(GO:0005794);clathrin adaptor complex(GO:0030131);cytosol(GO:0005829);plasma membrane(GO:0005886);cytoplasmic vesicle(GO:0016023);AP-2 adaptor complex(GO:0030122);endocytic vesicle membrane(GO:0030666);clathrin-coated endocytic vesicle membrane(GO:0030669);endolysosome membrane(GO:0036020);membrane(GO:0016020);cytoplasm(GO:0005737);clathrin-coated pit(GO:0…
Q06481	Amyloid-like protein 2	APLP2	AMYLOID-LIKE PROTEIN 2 (PTHR23103:SF20)		cellular process(GO:0009987)				heparin binding(GO:0008201);transition metal ion binding(GO:0046914);DNA binding(GO:0003677);serine-type endopeptidase inhibitor activity(GO:0004867);protein binding(GO:0005515);identical protein binding(GO:0042802);peptidase inhibitor activity(GO:0030414)	platelet degranulation(GO:0002576);G-protein coupled receptor signaling pathway(GO:0007186);negative regulation of endopeptidase activity(GO:0010951);negative regulation of peptidase activity(GO:0010466)	nucleus(GO:0005634);plasma membrane(GO:0005886);membrane(GO:0016020);integral component of membrane(GO:0016021);platelet alpha granule membrane(GO:0031092);extracellular exosome(GO:0070062)
Q9HBZ2	Aryl hydrocarbon receptor nuclear translocator 2	ARNT2	ARYL HYDROCARBON RECEPTOR NUCLEAR TRANSLOCATOR 2 (PTHR23042:SF76)	sequence-specific DNA binding transcription factor activity(GO:0005488)	regulation of transcription from RNA polymerase II promoter(GO:0008152)		basic helix-loop-helix transcription factor(PC00218)		DNA binding(GO:0003677);transcription factor activity, sequence-specific DNA binding(GO:0003700);protein dimerization activity(GO:0046983);RNA polymerase II core promoter proximal region sequence-specific DNA binding(GO:0000978);transcriptional activator activity, RNA polymerase II core promoter proximal region sequence-specific binding(GO:0001077);aryl hydrocarbon receptor binding(GO:0017162);pr…	transcription, DNA-templated(GO:0006351);regulation of transcription, DNA-templated(GO:0006355);response to hypoxia(GO:0001666);in utero embryonic development(GO:0001701);transcription from RNA polymerase II promoter(GO:0006366);central nervous system development(GO:0007417);brain development(GO:0007420);positive regulation of cell proliferation(GO:0008284);response to estradiol(GO:0032355);negat…	nucleus(GO:0005634);transcription factor complex(GO:0005667);cytoplasm(GO:0005737)
O14983	Sarcoplasmic/endoplasmic reticulum calcium ATPase 1	ATP2A1	SARCOPLASMIC/ENDOPLASMIC RETICULUM CALCIUM ATPASE 1 (PTHR42861:SF17)	ATPase activity, coupled to transmembrane movement of substances(GO:0003824);cation transmembrane transporter activity(GO:0016787);hydrogen ion transmembrane transporter activity(GO:0042626);pyrophosphatase activity(GO:0005215)	catabolic process(GO:0008152);cellular calcium ion homeostasis(GO:0009056);nitrogen compound metabolic process(GO:0065007);nucleobase-containing compound metabolic process(GO:0042592);phosphate-containing compound metabolic process(GO:0006874)	cytoplasm(GO:0044464);endoplasmic reticulum(GO:0005622);integral to membrane(GO:0005737);nuclear outer membrane-endoplasmic reticulum membrane network(GO:0043226);plasma membrane(GO:0005783)	cation transporter(PC00227);ion channel(PC00068)		nucleotide binding(GO:0000166);calcium-transporting ATPase activity(GO:0005388);ATP binding(GO:0005524);metal ion binding(GO:0046872);calcium ion binding(GO:0005509);protein binding(GO:0005515);protein homodimerization activity(GO:0042803);hydrolase activity(GO:0016787)	calcium ion transmembrane transport(GO:0070588);calcium ion transport(GO:0006816);regulation of striated muscle contraction(GO:0006942);apoptotic mitochondrial changes(GO:0008637);positive regulation of fast-twitch skeletal muscle fiber contraction(GO:0031448);positive regulation of endoplasmic reticulum calcium ion concentration(GO:0032470);negative regulation of endoplasmic reticulum calcium io…	integral component of membrane(GO:0016021);sarcoplasmic reticulum membrane(GO:0033017);mitochondrion(GO:0005739);endoplasmic reticulum membrane(GO:0005789);endoplasmic reticulum-Golgi intermediate compartment(GO:0005793);integral component of plasma membrane(GO:0005887);membrane(GO:0016020);sarcoplasmic reticulum(GO:0016529);platelet dense tubular network membrane(GO:0031095);H zone(GO:0031673);I…
P16615	Sarcoplasmic/endoplasmic reticulum calcium ATPase 2	ATP2A2	SARCOPLASMIC/ENDOPLASMIC RETICULUM CALCIUM ATPASE 2 (PTHR42861:SF31)	ATPase activity, coupled to transmembrane movement of substances(GO:0003824);cation transmembrane transporter activity(GO:0016787);hydrogen ion transmembrane transporter activity(GO:0042626);pyrophosphatase activity(GO:0005215)	catabolic process(GO:0008152);cellular calcium ion homeostasis(GO:0009056);nitrogen compound metabolic process(GO:0065007);nucleobase-containing compound metabolic process(GO:0042592);phosphate-containing compound metabolic process(GO:0006874)	cytoplasm(GO:0044464);endoplasmic reticulum(GO:0005622);integral to membrane(GO:0005737);nuclear outer membrane-endoplasmic reticulum membrane network(GO:0043226);plasma membrane(GO:0005783)	cation transporter(PC00227);ion channel(PC00068)		calcium-transporting ATPase activity(GO:0005388);ATP binding(GO:0005524);metal ion binding(GO:0046872);calcium ion binding(GO:0005509);protein binding(GO:0005515);protein C-terminus binding(GO:0008022);enzyme binding(GO:0019899);lutropin-choriogonadotropic hormone receptor binding(GO:0031775);S100 protein binding(GO:0044548);calcium-transporting ATPase activity involved in regulation of cardiac m…	calcium ion transmembrane transport(GO:0070588);regulation of the force of heart contraction(GO:0002026);cellular calcium ion homeostasis(GO:0006874);ER-nucleus signaling pathway(GO:0006984);organelle organization(GO:0006996);cell adhesion(GO:0007155);epidermis development(GO:0008544);positive regulation of heart rate(GO:0010460);regulation of cardiac muscle contraction by calcium ion signaling(G…	integral component of membrane(GO:0016021);sarcoplasmic reticulum membrane(GO:0033017);endoplasmic reticulum(GO:0005783);endoplasmic reticulum membrane(GO:0005789);integral component of plasma membrane(GO:0005887);vesicle membrane(GO:0012506);longitudinal sarcoplasmic reticulum(GO:0014801);membrane(GO:0016020);sarcoplasmic reticulum(GO:0016529);platelet dense tubular network membrane(GO:0031095);…
Q86VP6	Cullin-associated NEDD8-dissociated protein 1	CAND1	CULLIN-ASSOCIATED NEDD8-DISSOCIATED PROTEIN 1 (PTHR12696:SF3)		cellular component organization(GO:0071840);cellular process(GO:0016043);cellular protein modification process(GO:0009987);protein complex assembly(GO:0008152)	intracellular(GO:0044464);nucleus(GO:0005622)	transcription factor(PC00218)		protein binding(GO:0005515);TBP-class protein binding(GO:0017025)	SCF complex assembly(GO:0010265);protein ubiquitination(GO:0016567);cell differentiation(GO:0030154);negative regulation of catalytic activity(GO:0043086);positive regulation of RNA polymerase II transcriptional preinitiation complex assembly(GO:0045899);positive regulation of transcription, DNA-templated(GO:0045893)	ubiquitin ligase complex(GO:0000151);nucleus(GO:0005634);nucleoplasm(GO:0005654);cytoplasm(GO:0005737);Golgi apparatus(GO:0005794);membrane(GO:0016020);cullin-RING ubiquitin ligase complex(GO:0031461);extracellular exosome(GO:0070062)
P52907	F-actin-capping protein subunit alpha-1	CAPZA1	F-ACTIN-CAPPING PROTEIN SUBUNIT ALPHA-1 (PTHR10653:SF9)	actin binding(GO:0005488);structural constituent of cytoskeleton(GO:0005515)	cellular component morphogenesis(GO:0071840);cellular process(GO:0016043)	actin cytoskeleton(GO:0043226);intracellular(GO:0005856)	non-motor actin binding protein(PC00085)		actin binding(GO:0003779);protein binding(GO:0005515);cadherin binding involved in cell-cell adhesion(GO:0098641)	protein complex assembly(GO:0006461);movement of cell or subcellular component(GO:0006928);blood coagulation(GO:0007596);innate immune response(GO:0045087);barbed-end actin filament capping(GO:0051016);actin filament capping(GO:0051693);cell-cell adhesion(GO:0098609)	extracellular region(GO:0005576);cytosol(GO:0005829);cytoskeleton(GO:0005856);F-actin capping protein complex(GO:0008290);actin cytoskeleton(GO:0015629);extracellular exosome(GO:0070062);WASH complex(GO:0071203);cytoplasm(GO:0005737);cell-cell adherens junction(GO:0005913)
P47755	F-actin-capping protein subunit alpha-2	CAPZA2	F-ACTIN-CAPPING PROTEIN SUBUNIT ALPHA-2 (PTHR10653:SF11)	actin binding(GO:0005488);structural constituent of cytoskeleton(GO:0005515)	cellular component morphogenesis(GO:0071840);cellular process(GO:0016043)	actin cytoskeleton(GO:0043226);intracellular(GO:0005856)	non-motor actin binding protein(PC00085)		actin binding(GO:0003779)	barbed-end actin filament capping(GO:0051016);protein complex assembly(GO:0006461);movement of cell or subcellular component(GO:0006928);blood coagulation(GO:0007596);innate immune response(GO:0045087);actin filament capping(GO:0051693)	F-actin capping protein complex(GO:0008290);integral component of membrane(GO:0016021);extracellular region(GO:0005576);cytosol(GO:0005829);brush border(GO:0005903);actin cytoskeleton(GO:0015629);membrane(GO:0016020);cortical cytoskeleton(GO:0030863);extracellular exosome(GO:0070062)
P83916	Chromobox protein homolog 1	CBX1	CHROMOBOX PROTEIN HOMOLOG 1 (PTHR22812:SF126)	chromatin binding(GO:0005488);sequence-specific DNA binding transcription factor activity(GO:0003682)	cellular process(GO:0009987);chromatin organization(GO:0071840);regulation of transcription from RNA polymerase II promoter(GO:0016043)		chromatin/chromatin-binding protein(PC00171);transcription factor(PC00009)		chromatin binding(GO:0003682);protein binding(GO:0005515);enzyme binding(GO:0019899);protein homodimerization activity(GO:0042803);histone methyltransferase binding(GO:1990226);identical protein binding(GO:0042802)	negative regulation of transcription, DNA-templated(GO:0045892)	nucleus(GO:0005634);chromosome, centromeric region(GO:0000775);nuclear chromosome, telomeric region(GO:0000784);chromatin(GO:0000785);female pronucleus(GO:0001939);male pronucleus(GO:0001940);nucleoplasm(GO:0005654);nuclear heterochromatin(GO:0005720);pericentric heterochromatin(GO:0005721);spindle(GO:0005819);chromocenter(GO:0010369)
Q13185	Chromobox protein homolog 3	CBX3	CHROMOBOX PROTEIN HOMOLOG 3 (PTHR22812:SF123)	chromatin binding(GO:0005488);sequence-specific DNA binding transcription factor activity(GO:0003682)	cellular process(GO:0009987);chromatin organization(GO:0071840);regulation of transcription from RNA polymerase II promoter(GO:0016043)		chromatin/chromatin-binding protein(PC00171);transcription factor(PC00009)		protein binding(GO:0005515);enzyme binding(GO:0019899);protein domain specific binding(GO:0019904);identical protein binding(GO:0042802);histone methyltransferase binding(GO:1990226)	chromatin remodeling(GO:0006338);transcription, DNA-templated(GO:0006351);negative regulation of transcription, DNA-templated(GO:0045892);rhythmic process(GO:0048511);cellular response to dexamethasone stimulus(GO:0071549);regulation of transcription, DNA-templated(GO:0006355);chromatin organization(GO:0016568);covalent chromatin modification(GO:0016569)	chromosome, centromeric region(GO:0000775);condensed chromosome, centromeric region(GO:0000779);nuclear chromosome, telomeric region(GO:0000784);chromatin(GO:0000785);nucleus(GO:0005634);nuclear envelope(GO:0005635);nuclear inner membrane(GO:0005637);nuclear euchromatin(GO:0005719);nuclear heterochromatin(GO:0005720);spindle(GO:0005819);nuclear pericentric heterochromatin(GO:0031618);senescence-a…
Q99832	T-complex protein 1 subunit eta	CCT7	T-COMPLEX PROTEIN 1 SUBUNIT ETA (PTHR11353:SF139)		protein complex assembly(GO:0071840);protein folding(GO:0044085)		chaperonin(PC00072)		ATP binding(GO:0005524);unfolded protein binding(GO:0051082);protein binding(GO:0005515);identical protein binding(GO:0042802);nucleotide binding(GO:0000166)	protein folding(GO:0006457);binding of sperm to zona pellucida(GO:0007339);positive regulation of telomere maintenance via telomerase(GO:0032212);protein stabilization(GO:0050821);toxin transport(GO:1901998);positive regulation of establishment of protein localization to telomere(GO:1904851);positive regulation of protein localization to Cajal body(GO:1904871);positive regulation of telomerase RN…	zona pellucida receptor complex(GO:0002199);cytoplasm(GO:0005737);mitochondrion(GO:0005739);cytosol(GO:0005829);chaperonin-containing T-complex(GO:0005832);microtubule(GO:0005874);cell body(GO:0044297);extracellular exosome(GO:0070062)
P55287	Cadherin-11	CDH11	CADHERIN-11 (PTHR24027:SF403)	binding(GO:0005488)	cellular process(GO:0009987);heart development(GO:0032502);muscle organ development(GO:0048731);nervous system development(GO:0007507);sensory perception of sound(GO:0007498);visual perception(GO:0007517)		cadherin(PC00069)	Wnt signaling pathway->Cadherin;;Cadherin signaling pathway->Cadherin;;;	calcium ion binding(GO:0005509);metal ion binding(GO:0046872)	homophilic cell adhesion via plasma membrane adhesion molecules(GO:0007156);skeletal system development(GO:0001501);ossification(GO:0001503);cell adhesion(GO:0007155);corticospinal tract morphogenesis(GO:0021957);adherens junction organization(GO:0034332)	membrane(GO:0016020);plasma membrane(GO:0005886);integral component of membrane(GO:0016021);cytoplasm(GO:0005737);extracellular exosome(GO:0070062)
Q7Z460	CLIP-associating protein 1	CLASP1	CLIP-ASSOCIATING PROTEIN 1 (PTHR21567:SF49)	structural molecule activity(GO:0005198)	mitosis(GO:0009987)		structural protein(PC00211)		kinetochore binding(GO:0043515);microtubule plus-end binding(GO:0051010);dystroglycan binding(GO:0002162);protein binding(GO:0005515);microtubule binding(GO:0008017)	G2/M transition of mitotic cell cycle(GO:0000086);microtubule cytoskeleton organization(GO:0000226);microtubule bundle formation(GO:0001578);vesicle targeting(GO:0006903);microtubule nucleation(GO:0007020);negative regulation of microtubule depolymerization(GO:0007026);Golgi organization(GO:0007030);mitotic spindle organization(GO:0007052);sister chromatid cohesion(GO:0007062);establishment or ma…	kinetochore microtubule(GO:0005828);cytoplasmic microtubule(GO:0005881);kinetochore(GO:0000776);condensed chromosome kinetochore(GO:0000777);Golgi apparatus(GO:0005794);centrosome(GO:0005813);cytosol(GO:0005829);spindle microtubule(GO:0005876);cell cortex(GO:0005938);membrane(GO:0016020);cortical microtubule cytoskeleton(GO:0030981);centrosomal corona(GO:0031592);microtubule plus-end(GO:0035371);…
P39060	Collagen alpha-1(XVIII) chain	COL18A1	COLLAGEN ALPHA-1(XVIII) CHAIN (PTHR24023:SF733)		anatomical structure morphogenesis(GO:0032502);blood circulation(GO:0009653);ectoderm development(GO:0032501);macrophage activation(GO:0044707);mesoderm development(GO:0003008)			Integrin signalling pathway->Collagen;;	structural molecule activity(GO:0005198);protein binding(GO:0005515);identical protein binding(GO:0042802);metal ion binding(GO:0046872)	cell adhesion(GO:0007155);angiogenesis(GO:0001525);endothelial cell morphogenesis(GO:0001886);visual perception(GO:0007601);positive regulation of cell proliferation(GO:0008284);negative regulation of cell proliferation(GO:0008285);animal organ morphogenesis(GO:0009887);extracellular matrix organization(GO:0030198);positive regulation of cell migration(GO:0030335);collagen catabolic process(GO:00…	extracellular matrix(GO:0031012);extracellular region(GO:0005576);collagen trimer(GO:0005581);basement membrane(GO:0005604);extracellular space(GO:0005615);endoplasmic reticulum lumen(GO:0005788);extracellular exosome(GO:0070062);proteinaceous extracellular matrix(GO:0005578)
P20674	Cytochrome c oxidase subunit 5A, mitochondrial	COX5A	CYTOCHROME C OXIDASE SUBUNIT 5A, MITOCHONDRIAL (PTHR14200:SF14)	cation transmembrane transporter activity(GO:0005215);hydrogen ion transmembrane transporter activity(GO:0022857);oxidoreductase activity(GO:0008324)	biosynthetic process(GO:0008152);nitrogen compound metabolic process(GO:0009058);nucleobase-containing compound metabolic process(GO:0009987);oxidative phosphorylation(GO:0006807);respiratory electron transport chain(GO:0044238)	cytoplasm(GO:0044464);mitochondrial inner membrane(GO:0005622);protein complex(GO:0005737)	oxidase(PC00176)		cytochrome-c oxidase activity(GO:0004129);protein binding(GO:0005515);electron carrier activity(GO:0009055);metal ion binding(GO:0046872);oxidoreductase activity(GO:0016491)	hydrogen ion transmembrane transport(GO:1902600);mitochondrial electron transport, cytochrome c to oxygen(GO:0006123);oxidation-reduction process(GO:0055114)	mitochondrial inner membrane(GO:0005743);mitochondrial respiratory chain complex IV(GO:0005751);myelin sheath(GO:0043209);extracellular exosome(GO:0070062);mitochondrion(GO:0005739);membrane(GO:0016020)
P35222	Catenin beta-1	CTNNB1	CATENIN BETA-1 (PTHR23315:SF142)	protein binding(GO:0005488)		cytoplasm(GO:0044464);plasma membrane(GO:0005622);protein complex(GO:0005737)	cell adhesion molecule(PC00069);cytoskeletal protein(PC00085);signaling molecule(PC00207);storage protein(PC00210)	Wnt signaling pathway->Beta-Catenin;;Alzheimer disease-presenilin pathway->beta-catenin;;Gonadotropin-releasing hormone receptor pathway->CTNNB1;;Angiogenesis->Beta-catenin;;p53 pathway feedback loops 2->beta-catenin;;Cadherin signaling pathway->Beta-catenin;;CCKR signaling map->beta-catenin;;;;;;;;	signal transducer activity(GO:0004871);RNA polymerase II transcription factor binding(GO:0001085);RNA polymerase II activating transcription factor binding(GO:0001102);double-stranded DNA binding(GO:0003690);transcription factor activity, sequence-specific DNA binding(GO:0003700);transcription coactivator activity(GO:0003713);protein binding(GO:0005515);protein C-terminus binding(GO:0008022);tran…	signal transduction(GO:0007165);adherens junction assembly(GO:0034333);negative regulation of transcription from RNA polymerase II promoter(GO:0000122);embryonic axis specification(GO:0000578);branching involved in blood vessel morphogenesis(GO:0001569);branching involved in ureteric bud morphogenesis(GO:0001658);in utero embryonic development(GO:0001701);gastrulation with mouth forming second(GO…	plasma membrane(GO:0005886);spindle pole(GO:0000922);nucleus(GO:0005634);nucleoplasm(GO:0005654);transcription factor complex(GO:0005667);nuclear euchromatin(GO:0005719);cytoplasm(GO:0005737);centrosome(GO:0005813);cytosol(GO:0005829);cell-cell junction(GO:0005911);adherens junction(GO:0005912);cell-cell adherens junction(GO:0005913);fascia adherens(GO:0005916);bicellular tight junction(GO:000592…
Q9H2H0	CXXC-type zinc finger protein 4	CXXC4	CXXC-TYPE ZINC FINGER PROTEIN 4 (PTHR13419:SF5)						DNA binding(GO:0003677);zinc ion binding(GO:0008270);PDZ domain binding(GO:0030165);metal ion binding(GO:0046872)	zygotic specification of dorsal/ventral axis(GO:0007352);Wnt signaling pathway(GO:0016055);negative regulation of Wnt signaling pathway(GO:0030178)	cytoplasm(GO:0005737);cytoplasmic vesicle(GO:0031410)
O00429	Dynamin-1-like protein	DNM1L	DYNAMIN-1-LIKE PROTEIN (PTHR11566:SF104)	GTPase activity(GO:0003824);protein binding(GO:0016787);structural constituent of cytoskeleton(GO:0003924)	cellular component morphogenesis(GO:0071840);cellular process(GO:0016043);endocytosis(GO:0032989);intracellular protein transport(GO:0009987)	intracellular(GO:0044464);microtubule(GO:0005622)	hydrolase(PC00121);microtubule family cytoskeletal protein(PC00085);small GTPase(PC00157)		GTPase activity(GO:0003924);GTP binding(GO:0005525);protein binding(GO:0005515);lipid binding(GO:0008289);ubiquitin protein ligase binding(GO:0031625);identical protein binding(GO:0042802);protein homodimerization activity(GO:0042803);nucleotide binding(GO:0000166);hydrolase activity(GO:0016787);GTPase activator activity(GO:0005096);microtubule binding(GO:0008017);Rab GTPase binding(GO:0017137);G…	mitochondrial fission(GO:0000266);peroxisome fission(GO:0016559);release of cytochrome c from mitochondria(GO:0001836);dynamin family protein polymerization involved in mitochondrial fission(GO:0003374);endocytosis(GO:0006897);cellular component disassembly involved in execution phase of apoptosis(GO:0006921);regulation of mitochondrion organization(GO:0010821);regulation of protein oligomerizati…	cytoplasm(GO:0005737);intracellular membrane-bounded organelle(GO:0043231);mitochondrion(GO:0005739);mitochondrial outer membrane(GO:0005741);peroxisome(GO:0005777);Golgi apparatus(GO:0005794);cytosol(GO:0005829);microtubule(GO:0005874);brush border(GO:0005903);clathrin-coated pit(GO:0005905);microtubule cytoskeleton(GO:0015630);membrane(GO:0016020);cell junction(GO:0030054);synaptic vesicle memb…
Q14195	Dihydropyrimidinase-related protein 3	DPYSL3	DIHYDROPYRIMIDINASE-RELATED PROTEIN 3 (PTHR11647:SF86)	hydrolase activity(GO:0003824)	nucleobase-containing compound metabolic process(GO:0008152)		hydrolase(PC00121)	Axon guidance mediated by semaphorins->Collapsin response mediator protein;;Pyrimidine Metabolism->Dihydropyrimidinase;;;	hydrolase activity, acting on carbon-nitrogen (but not peptide) bonds(GO:0016810);protein binding(GO:0005515);SH3 domain binding(GO:0017124);filamin binding(GO:0031005);chondroitin sulfate binding(GO:0035374);hydrolase activity(GO:0016787)	regulation of neuron projection development(GO:0010975);regulation of cell migration(GO:0030334);response to axon injury(GO:0048678);actin filament bundle assembly(GO:0051017);positive regulation of filopodium assembly(GO:0051491);positive regulation of neuron projection development(GO:0010976);negative regulation of neuron projection development(GO:0010977);negative regulation of cell migration(…	extracellular space(GO:0005615);cytosol(GO:0005829);lamellipodium(GO:0030027);growth cone(GO:0030426);filamentous actin(GO:0031941);cell body(GO:0044297);exocytic vesicle(GO:0070382);cytoplasm(GO:0005737);cell projection(GO:0042995)
Q14152	Eukaryotic translation initiation factor 3 subunit A	EIF3A	EUKARYOTIC TRANSLATION INITIATION FACTOR 3 SUBUNIT A (PTHR14005:SF2)	translation initiation factor activity(GO:0045182)			translation initiation factor(PC00171)		structural molecule activity(GO:0005198);protein binding(GO:0005515);poly(A) RNA binding(GO:0044822);translation initiation factor activity(GO:0003743);RNA binding(GO:0003723);mRNA binding(GO:0003729);receptor tyrosine kinase binding(GO:0030971)	formation of translation preinitiation complex(GO:0001731);formation of cytoplasmic translation initiation complex(GO:0001732);translational initiation(GO:0006413);regulation of translational initiation(GO:0006446);IRES-dependent viral translational initiation(GO:0075522);viral translational termination-reinitiation(GO:0075525);translation(GO:0006412);translation reinitiation(GO:0002188);negative…	nucleus(GO:0005634);nucleolus(GO:0005730);cytoplasm(GO:0005737);cytosol(GO:0005829);eukaryotic translation initiation factor 3 complex(GO:0005852);membrane(GO:0016020);eukaryotic 43S preinitiation complex(GO:0016282);eukaryotic 48S preinitiation complex(GO:0033290);eukaryotic translation initiation factor 3 complex, eIF3m(GO:0071541);microtubule(GO:0005874);multi-eIF complex(GO:0043614);eukaryoti…
P60842	Eukaryotic initiation factor 4A-I	EIF4A1	EUKARYOTIC INITIATION FACTOR 4A-I (PTHR24031:SF379)	RNA helicase activity(GO:0003824);pyrophosphatase activity(GO:0004386)	RNA metabolic process(GO:0008152);biosynthetic process(GO:0044238);catabolic process(GO:0006139);nitrogen compound metabolic process(GO:0016070);phosphate-containing compound metabolic process(GO:0009058);translation(GO:0009056)		RNA helicase(PC00171)		nucleic acid binding(GO:0003676);ATP-dependent RNA helicase activity(GO:0004004);ATP binding(GO:0005524);RNA cap binding(GO:0000339);double-stranded RNA binding(GO:0003725);mRNA binding(GO:0003729);translation initiation factor activity(GO:0003743);helicase activity(GO:0004386);protein binding(GO:0005515);translation factor activity, RNA binding(GO:0008135);poly(A) RNA binding(GO:0044822);ATPase …	regulation of translational initiation(GO:0006446);nuclear-transcribed mRNA poly(A) tail shortening(GO:0000289);translational initiation(GO:0006413);regulation of gene expression(GO:0010468);RNA secondary structure unwinding(GO:0010501);viral process(GO:0016032);animal organ regeneration(GO:0031100);translation(GO:0006412)	cytoplasm(GO:0005737);cytosol(GO:0005829);membrane(GO:0016020);eukaryotic translation initiation factor 4F complex(GO:0016281);extracellular exosome(GO:0070062);nucleus(GO:0005634);extracellular matrix(GO:0031012)
P49327	Fatty acid synthase	FASN	FATTY ACID SYNTHASE (PTHR43775:SF2)	hydrolase activity, acting on ester bonds(GO:0003824);ligase activity(GO:0016787);methyltransferase activity(GO:0016788);transferase activity, transferring acyl groups(GO:0016874)	cellular amino acid metabolic process(GO:0008152);fatty acid biosynthetic process(GO:0044238)		acyltransferase(PC00220);dehydrogenase(PC00042);esterase(PC00176);methyltransferase(PC00092)		transmembrane signaling receptor activity(GO:0004888);[acyl-carrier-protein] S-acetyltransferase activity(GO:0004313);[acyl-carrier-protein] S-malonyltransferase activity(GO:0004314);3-oxoacyl-[acyl-carrier-protein] synthase activity(GO:0004315);3-oxoacyl-[acyl-carrier-protein] reductase (NADPH) activity(GO:0004316);3-hydroxypalmitoyl-[acyl-carrier-protein] dehydratase activity(GO:0004317);enoyl-…	apoptotic process(GO:0006915);immune response(GO:0006955);signal transduction(GO:0007165);biosynthetic process(GO:0009058);oxidation-reduction process(GO:0055114);metabolic process(GO:0008152);osteoblast differentiation(GO:0001649);acetyl-CoA metabolic process(GO:0006084);fatty acid metabolic process(GO:0006631);fatty acid biosynthetic process(GO:0006633);pantothenate metabolic process(GO:0015939…	membrane(GO:0016020);nucleus(GO:0005634);cytoplasm(GO:0005737);plasma membrane(GO:0005886);mitochondrion(GO:0005739);Golgi apparatus(GO:0005794);cytosol(GO:0005829);melanosome(GO:0042470);glycogen granule(GO:0042587);extracellular exosome(GO:0070062);integral component of membrane(GO:0016021);cell-cell adherens junction(GO:0005913)
P35637	RNA-binding protein FUS	FUS	RNA-BINDING PROTEIN FUS (PTHR23238:SF29)	catalytic activity(GO:0003824);mRNA binding(GO:0005488);sequence-specific DNA binding transcription factor activity(GO:0003676)	RNA splicing, via transesterification reactions(GO:0008152);mRNA splicing, via spliceosome(GO:0044238);neurological system process(GO:0006139)		DNA binding protein(PC00171);mRNA splicing factor(PC00009);transcription factor(PC00031)		nucleotide binding(GO:0000166);nucleic acid binding(GO:0003676);zinc ion binding(GO:0008270);DNA binding(GO:0003677);transcription coactivator activity(GO:0003713);RNA binding(GO:0003723);protein binding(GO:0005515);estrogen receptor binding(GO:0030331);myosin V binding(GO:0031489);ionotropic glutamate receptor binding(GO:0035255);identical protein binding(GO:0042802);poly(A) RNA binding(GO:00448…	mRNA splicing, via spliceosome(GO:0000398);cellular response to calcium ion(GO:0071277);regulation of nucleic acid-templated transcription(GO:1903506)	nucleoplasm(GO:0005654);nucleus(GO:0005634);polysome(GO:0005844);perikaryon(GO:0043204);dendritic spine head(GO:0044327);perinuclear region of cytoplasm(GO:0048471);cytoplasm(GO:0005737);dendrite(GO:0030425);neuronal cell body(GO:0043025);dendritic spine(GO:0043197)
Q00341	Vigilin	HDLBP	VIGILIN (PTHR10627:SF46)						RNA binding(GO:0003723);protein binding(GO:0005515);lipid binding(GO:0008289);poly(A) RNA binding(GO:0044822);nucleic acid binding(GO:0003676);cadherin binding involved in cell-cell adhesion(GO:0098641)	lipid transport(GO:0006869);cholesterol metabolic process(GO:0008203);lipid metabolic process(GO:0006629);transport(GO:0006810);steroid metabolic process(GO:0008202);cell-cell adhesion(GO:0098609)	cytoplasm(GO:0005737);nucleus(GO:0005634);plasma membrane(GO:0005886);high-density lipoprotein particle(GO:0034364);cell-cell adherens junction(GO:0005913)
P62805	Histone H4	HIST1H4A	HISTONE H4 (PTHR10484:SF144)	DNA binding(GO:0005488)	cellular process(GO:0009987);chromatin organization(GO:0071840);nucleobase-containing compound metabolic process(GO:0016043)		histone(PC00171)		DNA binding(GO:0003677);protein binding(GO:0005515);protein domain specific binding(GO:0019904);histone binding(GO:0042393);poly(A) RNA binding(GO:0044822);protein heterodimerization activity(GO:0046982);signal transducer activity(GO:0004871);G-protein coupled receptor activity(GO:0004930);histamine receptor activity(GO:0004969)	chromatin silencing at rDNA(GO:0000183);double-strand break repair via nonhomologous end joining(GO:0006303);nucleosome assembly(GO:0006334);DNA replication-dependent nucleosome assembly(GO:0006335);DNA replication-independent nucleosome assembly(GO:0006336);DNA-templated transcription, initiation(GO:0006352);telomere capping(GO:0016233);gene silencing by RNA(GO:0031047);telomere organization(GO:…	nuclear chromosome(GO:0000228);nuclear chromosome, telomeric region(GO:0000784);nucleosome(GO:0000786);extracellular region(GO:0005576);nucleus(GO:0005634);nucleoplasm(GO:0005654);membrane(GO:0016020);protein complex(GO:0043234);extracellular exosome(GO:0070062);chromosome(GO:0005694);cell(GO:0005623);integral component of membrane(GO:0016021);extracellular matrix(GO:0031012)
P19367	Hexokinase-1	HK1	HEXOKINASE-1 (PTHR19443:SF36)	carbohydrate kinase activity(GO:0003824)	catabolic process(GO:0008152);cellular glucose homeostasis(GO:0009056);glycolysis(GO:0065007);phosphate-containing compound metabolic process(GO:0042592)	cytosol(GO:0044464)		Pentose phosphate pathway->Hexokinase;;Glycolysis->Hexokinase;;Fructose galactose metabolism->Hexokinase;;;;	hexokinase activity(GO:0004396);ATP binding(GO:0005524);glucose binding(GO:0005536);glucokinase activity(GO:0004340);protein binding(GO:0005515);fructokinase activity(GO:0008865);mannokinase activity(GO:0019158);nucleotide binding(GO:0000166);kinase activity(GO:0016301);transferase activity(GO:0016740);phosphotransferase activity, alcohol group as acceptor(GO:0016773);catalytic activity(GO:000382…	cellular glucose homeostasis(GO:0001678);glycolytic process(GO:0006096);carbohydrate phosphorylation(GO:0046835);glucose transport(GO:0015758);glucose 6-phosphate metabolic process(GO:0051156);canonical glycolysis(GO:0061621);establishment of protein localization to mitochondrion(GO:0072655);maintenance of protein location in mitochondrion(GO:0072656);carbohydrate metabolic process(GO:0005975);ph…	cell(GO:0005623);mitochondrion(GO:0005739);mitochondrial outer membrane(GO:0005741);cytosol(GO:0005829);membrane raft(GO:0045121);sperm principal piece(GO:0097228);cilium(GO:0005929);membrane(GO:0016020)
Q9UK76	Hematological and neurological expressed 1 protein	HN1	HEMATOLOGICAL AND NEUROLOGICAL EXPRESSED 1 PROTEIN (PTHR34930:SF4)								nucleus(GO:0005634);nucleolus(GO:0005730);nuclear membrane(GO:0031965)
P09651	Heterogeneous nuclear ribonucleoprotein A1	HNRNPA1	HETEROGENEOUS NUCLEAR RIBONUCLEOPROTEIN A1 (PTHR24012:SF610)						nucleotide binding(GO:0000166);nucleic acid binding(GO:0003676);single-stranded DNA binding(GO:0003697);RNA binding(GO:0003723);single-stranded RNA binding(GO:0003727);protein binding(GO:0005515);poly(A) RNA binding(GO:0044822);telomeric repeat-containing RNA binding(GO:0061752);G-rich strand telomeric DNA binding(GO:0098505)	mRNA splicing, via spliceosome(GO:0000398);mRNA processing(GO:0006397);RNA export from nucleus(GO:0006405);fibroblast growth factor receptor signaling pathway(GO:0008543);gene expression(GO:0010467);viral process(GO:0016032);negative regulation of telomere maintenance via telomerase(GO:0032211);positive regulation of telomere maintenance via telomerase(GO:0032212);mRNA transport(GO:0051028);nucle…	nucleoplasm(GO:0005654);nucleus(GO:0005634);spliceosomal complex(GO:0005681);cytoplasm(GO:0005737);membrane(GO:0016020);intracellular ribonucleoprotein complex(GO:0030529);extracellular exosome(GO:0070062);catalytic step 2 spliceosome(GO:0071013);viral nucleocapsid(GO:0019013)
Q99729	Heterogeneous nuclear ribonucleoprotein A/B	HNRNPAB							nucleotide binding(GO:0000166);nucleic acid binding(GO:0003676);RNA binding(GO:0003723);mRNA binding(GO:0003729);protein binding(GO:0005515);poly(A) RNA binding(GO:0044822);transcription factor activity, sequence-specific DNA binding(GO:0003700);sequence-specific DNA binding(GO:0043565)	epithelial to mesenchymal transition(GO:0001837);positive regulation of transcription, DNA-templated(GO:0045893)	nucleoplasm(GO:0005654);nucleus(GO:0005634);cytoplasm(GO:0005737);intracellular ribonucleoprotein complex(GO:0030529);RNA polymerase II transcription factor complex(GO:0090575)
P07910	Heterogeneous nuclear ribonucleoproteins C1/C2	HNRNPC	HETEROGENEOUS NUCLEAR RIBONUCLEOPROTEINS C1/C2 (PTHR13968:SF26)			intracellular(GO:0044464);nucleus(GO:0005622)	mRNA processing factor(PC00171);ribonucleoprotein(PC00031)		nucleotide binding(GO:0000166);nucleic acid binding(GO:0003676);RNA polymerase II core promoter proximal region sequence-specific DNA binding(GO:0000978);RNA polymerase II distal enhancer sequence-specific DNA binding(GO:0000980);RNA binding(GO:0003723);mRNA 3'-UTR binding(GO:0003730);protein binding(GO:0005515);poly(U) RNA binding(GO:0008266);nucleosomal DNA binding(GO:0031492);identical protein…	mRNA splicing, via spliceosome(GO:0000398);osteoblast differentiation(GO:0001649);RNA splicing(GO:0008380);gene expression(GO:0010467);protein sumoylation(GO:0016925);negative regulation of telomere maintenance via telomerase(GO:0032211);ATP-dependent chromatin remodeling(GO:0043044);3'-UTR-mediated mRNA stabilization(GO:0070935);mRNA processing(GO:0006397)	viral nucleocapsid(GO:0019013);intracellular ribonucleoprotein complex(GO:0030529);nucleoplasm(GO:0005654);nuclear chromatin(GO:0000790);nucleus(GO:0005634);spliceosomal complex(GO:0005681);cytosol(GO:0005829);membrane(GO:0016020);protein complex(GO:0043234);pronucleus(GO:0045120);extracellular exosome(GO:0070062);catalytic step 2 spliceosome(GO:0071013);telomerase holoenzyme complex(GO:0005697)
P08238	Heat shock protein HSP 90-beta	HSP90AB1	HEAT SHOCK PROTEIN HSP 90-BETA-RELATED (PTHR11528:SF67)		protein folding(GO:0008152);response to stress(GO:0044238)		Hsp90 family chaperone(PC00072)		UTP binding(GO:0002134);CTP binding(GO:0002135);double-stranded RNA binding(GO:0003725);protein binding(GO:0005515);ATP binding(GO:0005524);GTP binding(GO:0005525);sulfonylurea receptor binding(GO:0017098);protein kinase regulator activity(GO:0019887);kinase binding(GO:0019900);protein kinase binding(GO:0019901);MHC class II protein complex binding(GO:0023026);nitric-oxide synthase regulator acti…	placenta development(GO:0001890);protein folding(GO:0006457);response to unfolded protein(GO:0006986);response to salt stress(GO:0009651);virion attachment to host cell(GO:0019062);regulation of protein ubiquitination(GO:0031396);positive regulation of protein binding(GO:0032092);negative regulation of proteasomal ubiquitin-dependent protein catabolic process(GO:0032435);positive regulation of pr…	nucleoplasm(GO:0005654);cytoplasm(GO:0005737);mitochondrion(GO:0005739);cytosol(GO:0005829);cell surface(GO:0009986);membrane(GO:0016020);inclusion body(GO:0016234);basolateral plasma membrane(GO:0016323);apical plasma membrane(GO:0016324);brush border membrane(GO:0031526);melanosome(GO:0042470);extracellular exosome(GO:0070062);COP9 signalosome(GO:0008180);intracellular(GO:0005622);nucleus(GO:00…
P11021	78 kDa glucose-regulated protein	HSPA5	78 KDA GLUCOSE-REGULATED PROTEIN (PTHR19375:SF279)					Apoptosis signaling pathway->Heat shock protein 70;;Parkinson disease->Heat shock protein 70;;;	glycoprotein binding(GO:0001948);calcium ion binding(GO:0005509);protein binding(GO:0005515);ATP binding(GO:0005524);ATPase activity(GO:0016887);enzyme binding(GO:0019899);protein domain specific binding(GO:0019904);ubiquitin protein ligase binding(GO:0031625);ribosome binding(GO:0043022);unfolded protein binding(GO:0051082);chaperone binding(GO:0051087);misfolded protein binding(GO:0051787);nucl…	ER overload response(GO:0006983);activation of signaling protein activity involved in unfolded protein response(GO:0006987);cerebellum structural organization(GO:0021589);cerebellar Purkinje cell layer development(GO:0021680);substantia nigra development(GO:0021762);positive regulation of cell migration(GO:0030335);ER-associated ubiquitin-dependent protein catabolic process(GO:0030433);negative r…	nucleus(GO:0005634);mitochondrion(GO:0005739);endoplasmic reticulum(GO:0005783);endoplasmic reticulum lumen(GO:0005788);endoplasmic reticulum membrane(GO:0005789);smooth endoplasmic reticulum(GO:0005790);endoplasmic reticulum-Golgi intermediate compartment(GO:0005793);plasma membrane(GO:0005886);focal adhesion(GO:0005925);cell surface(GO:0009986);membrane(GO:0016020);integral component of endopla…
Q96ST2	Protein IWS1 homolog	IWS1	PROTEIN IWS1 HOMOLOG (PTHR22908:SF71)				chaperone(PC00072)		DNA binding(GO:0003677);protein binding(GO:0005515)	transcription, DNA-templated(GO:0006351);regulation of transcription, DNA-templated(GO:0006355);mRNA processing(GO:0006397);RNA splicing(GO:0008380);regulation of mRNA export from nucleus(GO:0010793);regulation of mRNA processing(GO:0050684);mRNA transport(GO:0051028);regulation of histone H4 acetylation(GO:0090239);regulation of histone H3-K36 trimethylation(GO:2001253);transport(GO:0006810);reg…	nucleus(GO:0005634);nucleoplasm(GO:0005654)
A0MZ66	Shootin-1	KIAA1598	SHOOTIN-1 (PTHR23213:SF287)	actin binding(GO:0005488);structural constituent of cytoskeleton(GO:0005515)	cellular component movement(GO:0009987)	actin cytoskeleton(GO:0043226);intracellular(GO:0005856)	non-motor actin binding protein(PC00085)		protein binding(GO:0005515);kinesin binding(GO:0019894);actin filament binding(GO:0051015);cadherin binding involved in cell-cell adhesion(GO:0098641)	substrate-dependent cell migration, cell extension(GO:0006930);Ras protein signal transduction(GO:0007265);axonogenesis(GO:0007409);Cdc42 protein signal transduction(GO:0032488);netrin-activated signaling pathway(GO:0038007);positive regulation of axon extension(GO:0045773);neuron projection morphogenesis(GO:0048812);cytoplasmic actin-based contraction involved in cell motility(GO:0060327);endopl…	microtubule(GO:0005874);microtubule associated complex(GO:0005875);microtubule cytoskeleton(GO:0015630);lamellipodium(GO:0030027);filopodium(GO:0030175);axon(GO:0030424);growth cone(GO:0030426);cell leading edge(GO:0031252);perikaryon(GO:0043204);axonal growth cone(GO:0044295);perinuclear region of cytoplasm(GO:0048471);cytoplasm(GO:0005737);cytoskeleton(GO:0005856);cell projection(GO:0042995);ce…
Q12756	Kinesin-like protein KIF1A	KIF1A	KINESIN-LIKE PROTEIN KIF1A (PTHR24115:SF616)	microtubule motor activity(GO:0003824)	catabolic process(GO:0008152);cellular component movement(GO:0009056);nitrogen compound metabolic process(GO:0009987);nucleobase-containing compound metabolic process(GO:0006928);phosphate-containing compound metabolic process(GO:0006807);transport(GO:0044238)	cytoskeleton(GO:0043226);intracellular(GO:0005856);protein complex(GO:0044464)	microtubule binding motor protein(PC00085)		microtubule motor activity(GO:0003777);ATP binding(GO:0005524);microtubule binding(GO:0008017);motor activity(GO:0003774);ATPase activity(GO:0016887);nucleotide binding(GO:0000166)	microtubule-based movement(GO:0007018);anterograde axonal transport(GO:0008089)	microtubule(GO:0005874);kinesin complex(GO:0005871);axon cytoplasm(GO:1904115);cytoplasm(GO:0005737);cytoskeleton(GO:0005856)
O60333	Kinesin-like protein KIF1B	KIF1B	KINESIN-LIKE PROTEIN KIF1B (PTHR24115:SF606)	microtubule motor activity(GO:0003824)	catabolic process(GO:0008152);cellular component movement(GO:0009056);nitrogen compound metabolic process(GO:0009987);nucleobase-containing compound metabolic process(GO:0006928);phosphate-containing compound metabolic process(GO:0006807);transport(GO:0044238)	cytoskeleton(GO:0043226);intracellular(GO:0005856);protein complex(GO:0044464)	microtubule binding motor protein(PC00085)		microtubule motor activity(GO:0003777);ATP binding(GO:0005524);microtubule binding(GO:0008017);protein binding(GO:0005515);ATPase activity(GO:0016887);kinesin binding(GO:0019894);nucleotide binding(GO:0000166)	microtubule-based movement(GO:0007018);apoptotic process(GO:0006915);neuron-neuron synaptic transmission(GO:0007270);neuromuscular synaptic transmission(GO:0007274);anterograde axonal transport(GO:0008089);cytoskeleton-dependent intracellular transport(GO:0030705);mitochondrion transport along microtubule(GO:0047497)	mitochondrion(GO:0005739);kinesin complex(GO:0005871);microtubule(GO:0005874);microtubule associated complex(GO:0005875);cytoplasmic vesicle membrane(GO:0030659);cytoplasmic vesicle(GO:0031410);neuron projection(GO:0043005);axon cytoplasm(GO:1904115);cytoplasm(GO:0005737);cytoskeleton(GO:0005856);cytoplasmic vesicle(GO:0016023)
O43896	Kinesin-like protein KIF1C	KIF1C	KINESIN-LIKE PROTEIN KIF1C (PTHR24115:SF632)	microtubule motor activity(GO:0003824)	catabolic process(GO:0008152);cellular component movement(GO:0009056);nitrogen compound metabolic process(GO:0009987);nucleobase-containing compound metabolic process(GO:0006928);phosphate-containing compound metabolic process(GO:0006807);transport(GO:0044238)	cytoskeleton(GO:0043226);intracellular(GO:0005856);protein complex(GO:0044464)	microtubule binding motor protein(PC00085)		microtubule motor activity(GO:0003777);ATP binding(GO:0005524);microtubule binding(GO:0008017);motor activity(GO:0003774);protein binding(GO:0005515);ATPase activity(GO:0016887);poly(A) RNA binding(GO:0044822);nucleotide binding(GO:0000166)	microtubule-based movement(GO:0007018);retrograde vesicle-mediated transport, Golgi to ER(GO:0006890);cytoskeleton-dependent intracellular transport(GO:0030705)	microtubule(GO:0005874);endoplasmic reticulum(GO:0005783);Golgi apparatus(GO:0005794);kinesin complex(GO:0005871);cytoplasm(GO:0005737);cytoskeleton(GO:0005856)
O60282	Kinesin heavy chain isoform 5C	KIF5C	KINESIN HEAVY CHAIN ISOFORM 5C (PTHR24115:SF633)	microtubule motor activity(GO:0003824)	catabolic process(GO:0008152);cell differentiation(GO:0009056);cellular component morphogenesis(GO:0032502);cellular component movement(GO:0030154);nervous system development(GO:0071840);nitrogen compound metabolic process(GO:0016043);nucleobase-containing compound metabolic process(GO:0032989);phosphate-containing compound metabolic process(GO:0009987);protein localization(GO:0006928);response t…	cytoskeleton(GO:0043226);intracellular(GO:0005856);protein complex(GO:0044464)	microtubule binding motor protein(PC00085)		microtubule motor activity(GO:0003777);ATP binding(GO:0005524);microtubule binding(GO:0008017);protein binding(GO:0005515);ATP-dependent microtubule motor activity, plus-end-directed(GO:0008574);apolipoprotein receptor binding(GO:0034190);nucleotide binding(GO:0000166)	microtubule-based movement(GO:0007018);organelle organization(GO:0006996);axon guidance(GO:0007411);motor neuron axon guidance(GO:0008045);protein localization(GO:0008104);cytoskeleton-dependent intracellular transport(GO:0030705);mRNA transport(GO:0051028);transport(GO:0006810)	microtubule(GO:0005874);cytoplasm(GO:0005737);kinesin complex(GO:0005871);ciliary rootlet(GO:0035253);neuron projection(GO:0043005);cytoskeleton(GO:0005856)
P08729	Keratin, type II cytoskeletal 7	KRT7	KERATIN, TYPE II CYTOSKELETAL 7 (PTHR23239:SF234)	structural constituent of cytoskeleton(GO:0005198)	cellular component morphogenesis(GO:0071840);cellular process(GO:0016043)	intermediate filament cytoskeleton(GO:0043226);intracellular(GO:0005856)	intermediate filament(PC00085);structural protein(PC00129)		structural molecule activity(GO:0005198);protein binding(GO:0005515)	viral process(GO:0016032)	nucleus(GO:0005634);cytoplasm(GO:0005737);intermediate filament(GO:0005882);keratin filament(GO:0045095);extracellular exosome(GO:0070062)
O95678	Keratin, type II cytoskeletal 75	KRT75	KERATIN, TYPE II CYTOSKELETAL 75 (PTHR23239:SF317)	structural constituent of cytoskeleton(GO:0005198)	cellular component morphogenesis(GO:0071840);cellular process(GO:0016043)	intermediate filament cytoskeleton(GO:0043226);intracellular(GO:0005856)	intermediate filament(PC00085);structural protein(PC00129)		structural molecule activity(GO:0005198)	hematopoietic progenitor cell differentiation(GO:0002244)	intermediate filament(GO:0005882);keratin filament(GO:0045095);extracellular exosome(GO:0070062);intracellular(GO:0005622)
Q99538	Legumain	LGMN	LEGUMAIN (PTHR12000:SF25)	cysteine-type peptidase activity(GO:0003824)	catabolic process(GO:0008152);proteolysis(GO:0009056)	cytoplasm(GO:0044464);lysosome(GO:0005622);vacuole(GO:0005737)	cysteine protease(PC00121)		peptidase activity(GO:0008233);cysteine-type endopeptidase activity(GO:0004197);cysteine-type peptidase activity(GO:0008234);hydrolase activity(GO:0016787)	proteolysis(GO:0006508);toll-like receptor signaling pathway(GO:0002224);renal system process(GO:0003014);vacuolar protein processing(GO:0006624);response to acidic pH(GO:0010447);antigen processing and presentation of exogenous peptide antigen via MHC class II(GO:0019886);receptor catabolic process(GO:0032801);negative regulation of multicellular organism growth(GO:0040015);vitamin D metabolic p…	lysosome(GO:0005764);late endosome(GO:0005770);lysosomal lumen(GO:0043202);apical part of cell(GO:0045177);extracellular exosome(GO:0070062)
P36776	Lon protease homolog, mitochondrial	LONP1	LON PROTEASE HOMOLOG, MITOCHONDRIAL (PTHR43718:SF2)						ATP-dependent peptidase activity(GO:0004176);serine-type endopeptidase activity(GO:0004252);ATP binding(GO:0005524);sequence-specific DNA binding(GO:0043565);single-stranded DNA binding(GO:0003697);single-stranded RNA binding(GO:0003727);protein binding(GO:0005515);ADP binding(GO:0043531);G-quadruplex DNA binding(GO:0051880);DNA polymerase binding(GO:0070182);mitochondrial light strand promoter a…	misfolded or incompletely synthesized protein catabolic process(GO:0006515);cellular response to oxidative stress(GO:0034599);chaperone-mediated protein complex assembly(GO:0051131);oxidation-dependent protein catabolic process(GO:0070407);regulation of mitochondrial DNA replication(GO:0090296);proteolysis(GO:0006508);protein catabolic process(GO:0030163);mitochondrial genome maintenance(GO:00000…	nucleus(GO:0005634);nucleoplasm(GO:0005654);cytoplasm(GO:0005737);mitochondrion(GO:0005739);mitochondrial matrix(GO:0005759);membrane(GO:0016020);mitochondrial nucleoid(GO:0042645)
P33991	DNA replication licensing factor MCM4	MCM4	DNA REPLICATION LICENSING FACTOR MCM4 (PTHR11630:SF79)	DNA helicase activity(GO:0003824);hydrolase activity(GO:0004386);nucleic acid binding(GO:0003678)	DNA replication(GO:0008152);cell cycle(GO:0044238)		DNA helicase(PC00171);hydrolase(PC00009)		DNA binding(GO:0003677);helicase activity(GO:0004386);ATP binding(GO:0005524);single-stranded DNA binding(GO:0003697);protein binding(GO:0005515);ATP-dependent DNA helicase activity(GO:0004003);nucleotide binding(GO:0000166);DNA helicase activity(GO:0003678);hydrolase activity(GO:0016787);nucleoside-triphosphatase activity(GO:0017111)	DNA replication(GO:0006260);G1/S transition of mitotic cell cycle(GO:0000082);DNA unwinding involved in DNA replication(GO:0006268);DNA replication initiation(GO:0006270);DNA duplex unwinding(GO:0032508);cell cycle(GO:0007049)	nucleoplasm(GO:0005654);nuclear chromosome, telomeric region(GO:0000784);nucleus(GO:0005634);membrane(GO:0016020);MCM complex(GO:0042555)
P40926	Malate dehydrogenase, mitochondrial	MDH2	MALATE DEHYDROGENASE, MITOCHONDRIAL (PTHR11540:SF35)	oxidoreductase activity(GO:0003824)	carbohydrate metabolic process(GO:0008152);tricarboxylic acid cycle(GO:0044238)		dehydrogenase(PC00176)		L-malate dehydrogenase activity(GO:0030060);protein self-association(GO:0043621);poly(A) RNA binding(GO:0044822);malate dehydrogenase (NADP+) activity(GO:0046554);catalytic activity(GO:0003824);oxidoreductase activity(GO:0016491);malate dehydrogenase activity(GO:0016615);oxidoreductase activity, acting on the CH-OH group of donors, NAD or NADP as acceptor(GO:0016616)	carbohydrate metabolic process(GO:0005975);tricarboxylic acid cycle(GO:0006099);malate metabolic process(GO:0006108);gluconeogenesis(GO:0006094);oxaloacetate metabolic process(GO:0006107);internal protein amino acid acetylation(GO:0006475);NADH metabolic process(GO:0006734);carboxylic acid metabolic process(GO:0019752);oxidation-reduction process(GO:0055114)	nucleoplasm(GO:0005654);mitochondrion(GO:0005739);plasma membrane(GO:0005886);nucleus(GO:0005634);mitochondrial inner membrane(GO:0005743);mitochondrial matrix(GO:0005759);myelin sheath(GO:0043209);extracellular exosome(GO:0070062);membrane(GO:0016020)
P50579	Methionine aminopeptidase 2	METAP2	METHIONINE AMINOPEPTIDASE 2 (PTHR10804:SF118)	metallopeptidase activity(GO:0003824);sequence-specific DNA binding transcription factor activity(GO:0016787)	cellular protein modification process(GO:0008152);proteolysis(GO:0044238);translation(GO:0019538)		metalloprotease(PC00121);nucleic acid binding(PC00190);transcription factor(PC00153)		metal ion binding(GO:0046872);metalloaminopeptidase activity(GO:0070006);aminopeptidase activity(GO:0004177);metalloexopeptidase activity(GO:0008235);poly(A) RNA binding(GO:0044822);peptidase activity(GO:0008233);hydrolase activity(GO:0016787)	proteolysis(GO:0006508);protein initiator methionine removal(GO:0070084);protein processing(GO:0016485);peptidyl-methionine modification(GO:0018206);regulation of rhodopsin mediated signaling pathway(GO:0022400);N-terminal protein amino acid modification(GO:0031365)	cytoplasm(GO:0005737);plasma membrane(GO:0005886);cytosol(GO:0005829)
E9PAV3	Nascent polypeptide-associated complex subunit alpha, muscle-specific form	NACA	NASCENT POLYPEPTIDE-ASSOCIATED COMPLEX SUBUNIT ALPHA, MUSCLE-SPECIFIC FORM-RELATED (PTHR21713:SF10)	sequence-specific DNA binding transcription factor activity(GO:0005488)	nucleobase-containing compound metabolic process(GO:0008152)		basic helix-loop-helix transcription factor(PC00218)		DNA binding(GO:0003677);transcription coactivator activity(GO:0003713);protein binding(GO:0005515)	transcription, DNA-templated(GO:0006351);regulation of transcription, DNA-templated(GO:0006355);cardiac ventricle development(GO:0003231);translation(GO:0006412);negative regulation of striated muscle cell apoptotic process(GO:0010664);protein transport(GO:0015031);viral process(GO:0016032);skeletal muscle tissue regeneration(GO:0043403);positive regulation of skeletal muscle tissue growth(GO:004…	nucleus(GO:0005634);cytoplasm(GO:0005737);nascent polypeptide-associated complex(GO:0005854);extracellular exosome(GO:0070062)
P19338	Nucleolin	NCL	NUCLEOLIN (PTHR24012:SF568)				ribosomal protein(PC00171)		nucleotide binding(GO:0000166);nucleic acid binding(GO:0003676);single-stranded DNA binding(GO:0003697);RNA binding(GO:0003723);calcium ion binding(GO:0005509);protein binding(GO:0005515);protein C-terminus binding(GO:0008022);selenocysteine insertion sequence binding(GO:0035368);rRNA primary transcript binding(GO:0042134);telomeric DNA binding(GO:0042162);histone binding(GO:0042393);identical pr…	angiogenesis(GO:0001525);endocytosis(GO:0006897);spermatogenesis(GO:0007283);positive regulation of tumor necrosis factor production(GO:0032760);negative regulation of apoptotic process(GO:0043066);positive regulation of transcription from RNA polymerase II promoter(GO:0045944);cellular response to lipopolysaccharide(GO:0071222);liver regeneration(GO:0097421);positive regulation of transcription …	nucleus(GO:0005634);nucleolus(GO:0005730);fibrillar center(GO:0001650);dense fibrillar component(GO:0001651);nucleoplasm(GO:0005654);cell cortex(GO:0005938);cell surface(GO:0009986);membrane(GO:0016020);intracellular ribonucleoprotein complex(GO:0030529);cytoplasmic ribonucleoprotein granule(GO:0036464);extracellular exosome(GO:0070062);cytoplasm(GO:0005737)
Q15233	Non-POU domain-containing octamer-binding protein	NONO	NON-POU DOMAIN-CONTAINING OCTAMER-BINDING PROTEIN (PTHR23189:SF63)	DNA binding(GO:0005488)	RNA splicing, via transesterification reactions(GO:0008152);biosynthetic process(GO:0044238);mRNA splicing, via spliceosome(GO:0006139);transcription, DNA-dependent(GO:0016070)	intracellular(GO:0044464);nucleus(GO:0005622)	mRNA splicing factor(PC00171)		nucleotide binding(GO:0000166);nucleic acid binding(GO:0003676);transcription regulatory region sequence-specific DNA binding(GO:0000976);RNA polymerase II distal enhancer sequence-specific DNA binding(GO:0000980);core promoter binding(GO:0001047);chromatin binding(GO:0003682);protein binding(GO:0005515);identical protein binding(GO:0042802);poly(A) RNA binding(GO:0044822);DNA binding(GO:0003677)…	mRNA splicing, via spliceosome(GO:0000398);DNA repair(GO:0006281);DNA recombination(GO:0006310);transcription, DNA-templated(GO:0006351);regulation of transcription, DNA-templated(GO:0006355);mRNA processing(GO:0006397);circadian rhythm(GO:0007623);RNA splicing(GO:0008380);regulation of circadian rhythm(GO:0042752);negative regulation of transcription, DNA-templated(GO:0045892);negative regulatio…	nucleus(GO:0005634);nucleoplasm(GO:0005654);nucleolus(GO:0005730);membrane(GO:0016020);nuclear matrix(GO:0016363);nuclear speck(GO:0016607);paraspeckles(GO:0042382);RNA polymerase II transcription factor complex(GO:0090575)
Q9H0G5	Nuclear speckle splicing regulatory protein 1	NSRP1	NUCLEAR SPECKLE SPLICING REGULATORY PROTEIN 1 (PTHR31938:SF7)						mRNA binding(GO:0003729);protein binding(GO:0005515);poly(A) RNA binding(GO:0044822);RNA binding(GO:0003723)	regulation of alternative mRNA splicing, via spliceosome(GO:0000381);mRNA processing(GO:0006397);nucleocytoplasmic transport(GO:0006913);RNA splicing(GO:0008380);developmental process(GO:0032502)	nucleus(GO:0005634);nuclear speck(GO:0016607);intracellular ribonucleoprotein complex(GO:0030529)
O43252	Bifunctional 3'-phosphoadenosine 5'-phosphosulfate synthase 1	PAPSS1	BIFUNCTIONAL 3'-PHOSPHOADENOSINE 5'-PHOSPHOSULFATE SYNTHASE 1 (PTHR11055:SF32)	kinase activity(GO:0003824)	biosynthetic process(GO:0008152);nitrogen compound metabolic process(GO:0009058);nucleobase-containing compound metabolic process(GO:0009987);phosphate-containing compound metabolic process(GO:0006807);sulfur compound metabolic process(GO:0044238)		kinase(PC00220);nucleotidyltransferase(PC00137)	Sulfate assimilation->Sulfate adenylyltransferase;;	adenylylsulfate kinase activity(GO:0004020);sulfate adenylyltransferase (ATP) activity(GO:0004781);ATP binding(GO:0005524);nucleotidyltransferase activity(GO:0016779);nucleotide binding(GO:0000166);catalytic activity(GO:0003824);kinase activity(GO:0016301);transferase activity(GO:0016740);diamine N-acetyltransferase activity(GO:0004145);protein binding(GO:0005515);N-acetyltransferase activity(GO:…	sulfate assimilation(GO:0000103);skeletal system development(GO:0001501);phosphorylation(GO:0016310);3'-phosphoadenosine 5'-phosphosulfate biosynthetic process(GO:0050428);metabolic process(GO:0008152);regulation of cell proliferation(GO:0042127)	cytosol(GO:0005829)
Q86U86	Protein polybromo-1	PBRM1	PROTEIN POLYBROMO-1 (PTHR16062:SF17)						chromatin binding(GO:0003682);DNA binding(GO:0003677);protein binding(GO:0005515)	chromatin remodeling(GO:0006338);transcription, DNA-templated(GO:0006351);regulation of transcription, DNA-templated(GO:0006355);mitotic nuclear division(GO:0007067);negative regulation of cell proliferation(GO:0008285);chromatin organization(GO:0016568);covalent chromatin modification(GO:0016569)	nuclear chromosome(GO:0000228);nucleoplasm(GO:0005654);BAF-type complex(GO:0090544);nucleus(GO:0005634)
Q15366	Poly(rC)-binding protein 2	PCBP2	POLY(RC)-BINDING PROTEIN 2 (PTHR10288:SF177)	catalytic activity(GO:0003824);mRNA binding(GO:0005488);protein binding(GO:0003676)	RNA splicing, via transesterification reactions(GO:0008152);induction of apoptosis(GO:0044238);mRNA splicing, via spliceosome(GO:0006139);neurological system process(GO:0016070);nuclear transport(GO:0000375);protein metabolic process(GO:0032502);transcription from RNA polymerase II promoter(GO:0016265)	ribonucleoprotein complex(GO:0032991)	enzyme modulator(PC00095);mRNA splicing factor(PC00171);ribonucleoprotein(PC00031)		RNA binding(GO:0003723);DNA binding(GO:0003677);protein binding(GO:0005515);enzyme binding(GO:0019899);ubiquitin protein ligase binding(GO:0031625);poly(A) RNA binding(GO:0044822);nucleic acid binding(GO:0003676);C-rich single-stranded DNA binding(GO:1990829)	mRNA splicing, via spliceosome(GO:0000398);gene expression(GO:0010467);mRNA metabolic process(GO:0016071);negative regulation of type I interferon production(GO:0032480);viral RNA genome replication(GO:0039694);proteasome-mediated ubiquitin-dependent protein catabolic process(GO:0043161);innate immune response(GO:0045087);negative regulation of defense response to virus(GO:0050687);defense respon…	nucleus(GO:0005634);nucleoplasm(GO:0005654);cytoplasm(GO:0005737);cytosol(GO:0005829);focal adhesion(GO:0005925);membrane(GO:0016020);intracellular ribonucleoprotein complex(GO:0030529);extracellular exosome(GO:0070062)
P57721	Poly(rC)-binding protein 3	PCBP3	POLY(RC)-BINDING PROTEIN 3 (PTHR10288:SF183)	catalytic activity(GO:0003824);mRNA binding(GO:0005488);protein binding(GO:0003676)	RNA splicing, via transesterification reactions(GO:0008152);induction of apoptosis(GO:0044238);mRNA splicing, via spliceosome(GO:0006139);neurological system process(GO:0016070);nuclear transport(GO:0000375);protein metabolic process(GO:0032502);transcription from RNA polymerase II promoter(GO:0016265)	ribonucleoprotein complex(GO:0032991)	enzyme modulator(PC00095);mRNA splicing factor(PC00171);ribonucleoprotein(PC00031)		RNA binding(GO:0003723);DNA binding(GO:0003677);poly(A) RNA binding(GO:0044822);nucleic acid binding(GO:0003676);transcriptional repressor activity, RNA polymerase II transcription regulatory region sequence-specific binding(GO:0001227);double-stranded DNA binding(GO:0003690);C-rich single-stranded DNA binding(GO:1990829)	mRNA metabolic process(GO:0016071);negative regulation of transcription from RNA polymerase II promoter(GO:0000122)	nucleus(GO:0005634);cytosol(GO:0005829);intracellular ribonucleoprotein complex(GO:0030529);extracellular exosome(GO:0070062);cytoplasm(GO:0005737)
P02689	Myelin P2 protein	PMP2	MYELIN P2 PROTEIN (PTHR11955:SF114)						transporter activity(GO:0005215);lipid binding(GO:0008289);fatty acid binding(GO:0005504);protein binding(GO:0005515);cholesterol binding(GO:0015485)	transport(GO:0006810);membrane organization(GO:0061024)	myelin sheath(GO:0043209);cytoplasm(GO:0005737);extracellular exosome(GO:0070062)
P62333	26S protease regulatory subunit 10B	PSMC6	26S PROTEASE REGULATORY SUBUNIT 10B (PTHR23073:SF49)				hydrolase(PC00121)	Ubiquitin proteasome pathway->26S proteasome;;	ATP binding(GO:0005524);hydrolase activity(GO:0016787);protein binding(GO:0005515);ATPase activity(GO:0016887);TBP-class protein binding(GO:0017025);protein binding, bridging(GO:0030674);proteasome-activating ATPase activity(GO:0036402);nucleotide binding(GO:0000166);identical protein binding(GO:0042802)	protein catabolic process(GO:0030163);positive regulation of inclusion body assembly(GO:0090261);MAPK cascade(GO:0000165);protein polyubiquitination(GO:0000209);stimulatory C-type lectin receptor signaling pathway(GO:0002223);antigen processing and presentation of exogenous peptide antigen via MHC class I, TAP-dependent(GO:0002479);ubiquitin-dependent protein catabolic process(GO:0006511);regulat…	inclusion body(GO:0016234);proteasome accessory complex(GO:0022624);cytosolic proteasome complex(GO:0031597);proteasome complex(GO:0000502);nucleus(GO:0005634);nucleoplasm(GO:0005654);cytosol(GO:0005829);proteasome regulatory particle, base subcomplex(GO:0008540);membrane(GO:0016020);nuclear proteasome complex(GO:0031595);extracellular exosome(GO:0070062);cytoplasm(GO:0005737)
Q13200	26S proteasome non-ATPase regulatory subunit 2	PSMD2	26S PROTEASOME NON-ATPASE REGULATORY SUBUNIT 2 (PTHR10943:SF7)	peptidase activity(GO:0003824)	catabolic process(GO:0008152);proteolysis(GO:0009056)	cytosol(GO:0044464);nucleus(GO:0005622);protein complex(GO:0005737)	enzyme modulator(PC00095)	Ubiquitin proteasome pathway->26S proteasome;;	protein binding(GO:0005515);enzyme regulator activity(GO:0030234);endopeptidase activity(GO:0004175)	MAPK cascade(GO:0000165);protein polyubiquitination(GO:0000209);stimulatory C-type lectin receptor signaling pathway(GO:0002223);antigen processing and presentation of exogenous peptide antigen via MHC class I, TAP-dependent(GO:0002479);regulation of cellular amino acid metabolic process(GO:0006521);anaphase-promoting complex-dependent catabolic process(GO:0031145);tumor necrosis factor-mediated …	proteasome complex(GO:0000502);nucleus(GO:0005634);nucleoplasm(GO:0005654);cytosol(GO:0005829);proteasome regulatory particle(GO:0005838);proteasome regulatory particle, base subcomplex(GO:0008540);membrane(GO:0016020);proteasome accessory complex(GO:0022624);proteasome storage granule(GO:0034515);extracellular exosome(GO:0070062)
P20339	Ras-related protein Rab-5A	RAB5A	RAS-RELATED PROTEIN RAB-5A (PTHR24073:SF736)		cellular component biogenesis(GO:0071840);cellular component organization(GO:0044085);cellular process(GO:0016043);endocytosis(GO:0009987);regulation of biological process(GO:0051179)	cytoplasm(GO:0044464);cytoplasmic membrane-bounded vesicle(GO:0005622);endosome(GO:0005737);plasma membrane(GO:0043226)			GTP binding(GO:0005525);GTPase activity(GO:0003924);protein binding(GO:0005515);GDP binding(GO:0019003);guanyl nucleotide binding(GO:0019001);nucleotide binding(GO:0000166)	small GTPase mediated signal transduction(GO:0007264);endocytosis(GO:0006897);phagocytosis(GO:0006909);blood coagulation(GO:0007596);protein transport(GO:0015031);regulation of endocytosis(GO:0030100);synaptic vesicle recycling(GO:0036465);early endosome to late endosome transport(GO:0045022);positive regulation of exocytosis(GO:0045921);regulation of endosome size(GO:0051036);regulation of filop…	intracellular(GO:0005622);ruffle(GO:0001726);cytoplasm(GO:0005737);endosome(GO:0005768);early endosome(GO:0005769);cytosol(GO:0005829);plasma membrane(GO:0005886);synaptic vesicle(GO:0008021);endosome membrane(GO:0010008);actin cytoskeleton(GO:0015629);endocytic vesicle(GO:0030139);axon(GO:0030424);dendrite(GO:0030425);phagocytic vesicle membrane(GO:0030670);somatodendritic compartment(GO:0036477…
P61020	Ras-related protein Rab-5B	RAB5B	RAS-RELATED PROTEIN RAB-5B (PTHR24073:SF694)		cellular component organization(GO:0071840);cellular process(GO:0016043);endocytosis(GO:0009987);regulation of biological process(GO:0051179)	cytoplasm(GO:0044464);cytoplasmic membrane-bounded vesicle(GO:0005622);endosome(GO:0005737);plasma membrane(GO:0043226)			GTP binding(GO:0005525);GTPase activity(GO:0003924);protein binding(GO:0005515);GDP binding(GO:0019003);GTP-dependent protein binding(GO:0030742);nucleotide binding(GO:0000166)	small GTPase mediated signal transduction(GO:0007264);endosome organization(GO:0007032);protein transport(GO:0015031);antigen processing and presentation(GO:0019882);regulation of endocytosis(GO:0030100);plasma membrane to endosome transport(GO:0048227);transport(GO:0006810)	intracellular(GO:0005622);endosome(GO:0005768);early endosome(GO:0005769);plasma membrane(GO:0005886);membrane(GO:0016020);endocytic vesicle(GO:0030139);early endosome membrane(GO:0031901);melanosome(GO:0042470);extracellular exosome(GO:0070062)
P51148	Ras-related protein Rab-5C	RAB5C	RAS-RELATED PROTEIN RAB-5C (PTHR24073:SF730)		cellular component organization(GO:0071840);cellular process(GO:0016043);endocytosis(GO:0009987);regulation of biological process(GO:0051179)	cytoplasm(GO:0044464);cytoplasmic membrane-bounded vesicle(GO:0005622);endosome(GO:0005737);plasma membrane(GO:0043226)			GTP binding(GO:0005525);GTPase activity(GO:0003924);protein binding(GO:0005515);GDP binding(GO:0019003);nucleotide binding(GO:0000166)	small GTPase mediated signal transduction(GO:0007264);protein transport(GO:0015031);regulation of endocytosis(GO:0030100);plasma membrane to endosome transport(GO:0048227);transport(GO:0006810)	intracellular(GO:0005622);lysosomal membrane(GO:0005765);early endosome(GO:0005769);lipid particle(GO:0005811);plasma membrane(GO:0005886);endocytic vesicle(GO:0030139);early endosome membrane(GO:0031901);melanosome(GO:0042470);intracellular membrane-bounded organelle(GO:0043231);extracellular exosome(GO:0070062);endosome(GO:0005768);membrane(GO:0016020)
P08708	40S ribosomal protein S17	RPS17	40S RIBOSOMAL PROTEIN S17-RELATED (PTHR10732:SF5)		biosynthetic process(GO:0008152);cellular component biogenesis(GO:0009058);organelle organization(GO:0071840);translation(GO:0044085)	cytosol(GO:0044464);organelle(GO:0005622);ribosome(GO:0005737)	ribosomal protein(PC00171)		structural constituent of ribosome(GO:0003735);poly(A) RNA binding(GO:0044822)	translation(GO:0006412);ribosomal small subunit assembly(GO:0000028);nuclear-transcribed mRNA catabolic process, nonsense-mediated decay(GO:0000184);rRNA processing(GO:0006364);translational initiation(GO:0006413);SRP-dependent cotranslational protein targeting to membrane(GO:0006614);viral transcription(GO:0019083);erythrocyte homeostasis(GO:0034101);ribosomal small subunit biogenesis(GO:0042274)	ribosome(GO:0005840);nucleoplasm(GO:0005654);cytosol(GO:0005829);focal adhesion(GO:0005925);membrane(GO:0016020);cytosolic small ribosomal subunit(GO:0022627);extracellular exosome(GO:0070062);intracellular(GO:0005622);intracellular ribonucleoprotein complex(GO:0030529);extracellular matrix(GO:0031012)
P23246	Splicing factor, proline- and glutamine-rich	SFPQ	SPLICING FACTOR, PROLINE- AND GLUTAMINE-RICH (PTHR23189:SF67)	DNA binding(GO:0005488)	RNA splicing, via transesterification reactions(GO:0008152);biosynthetic process(GO:0044238);mRNA splicing, via spliceosome(GO:0006139);transcription, DNA-dependent(GO:0016070)	intracellular(GO:0044464);nucleus(GO:0005622)	mRNA splicing factor(PC00171)		nucleotide binding(GO:0000166);transcription regulatory region sequence-specific DNA binding(GO:0000976);RNA polymerase II distal enhancer sequence-specific DNA binding(GO:0000980);core promoter binding(GO:0001047);chromatin binding(GO:0003682);protein binding(GO:0005515);histone deacetylase binding(GO:0042826);transcription regulatory region DNA binding(GO:0044212);poly(A) RNA binding(GO:0044822…	negative regulation of transcription from RNA polymerase II promoter(GO:0000122);alternative mRNA splicing, via spliceosome(GO:0000380);double-strand break repair via homologous recombination(GO:0000724);transcription, DNA-templated(GO:0006351);mRNA processing(GO:0006397);RNA splicing(GO:0008380);regulation of circadian rhythm(GO:0042752);negative regulation of circadian rhythm(GO:0042754);positi…	chromatin(GO:0000785);nucleus(GO:0005634);nucleoplasm(GO:0005654);cytoplasm(GO:0005737);nuclear matrix(GO:0016363);paraspeckles(GO:0042382);RNA polymerase II transcription factor complex(GO:0090575);extracellular matrix(GO:0031012)
P42285	Superkiller viralicidic activity 2-like 2	SKIV2L2	SUPERKILLER VIRALICIDIC ACTIVITY 2-LIKE 2 (PTHR12131:SF5)						RNA helicase activity(GO:0003724);protein binding(GO:0005515);ATP binding(GO:0005524);poly(A) RNA binding(GO:0044822);nucleotide binding(GO:0000166);nucleic acid binding(GO:0003676);RNA binding(GO:0003723);helicase activity(GO:0004386);hydrolase activity(GO:0016787);ATP-dependent RNA helicase activity(GO:0004004)	mRNA splicing, via spliceosome(GO:0000398);maturation of 5.8S rRNA(GO:0000460);rRNA processing(GO:0006364);RNA catabolic process(GO:0006401);mRNA processing(GO:0006397);RNA splicing(GO:0008380)	nucleus(GO:0005634);nucleoplasm(GO:0005654);nucleolus(GO:0005730);catalytic step 2 spliceosome(GO:0071013);exosome (RNase complex)(GO:0000178);spliceosomal complex(GO:0005681)
Q96GM5	SWI/SNF-related matrix-associated actin-dependent regulator of chromatin subfamily D member 1	SMARCD1	SWI/SNF-RELATED MATRIX-ASSOCIATED ACTIN-DEPENDENT REGULATOR OF CHROMATIN SUBFAMILY D MEMBER 1 (PTHR13844:SF32)	chromatin binding(GO:0005488);nucleic acid binding(GO:0003682)	cellular process(GO:0009987);chromatin organization(GO:0071840);nucleobase-containing compound metabolic process(GO:0016043)		chromatin/chromatin-binding protein(PC00171)	Wnt signaling pathway->Switched/Sucrose Non Fermentation;;	chromatin binding(GO:0003682);transcription coactivator activity(GO:0003713);receptor binding(GO:0005102);protein binding(GO:0005515);protein complex scaffold(GO:0032947)	nucleosome disassembly(GO:0006337);chromatin remodeling(GO:0006338);regulation of transcription from RNA polymerase II promoter(GO:0006357);nervous system development(GO:0007399);chromatin-mediated maintenance of transcription(GO:0048096);cellular response to fatty acid(GO:0071398);chromatin organization(GO:0016568);covalent chromatin modification(GO:0016569)	SWI/SNF complex(GO:0016514);npBAF complex(GO:0071564);nBAF complex(GO:0071565);nucleus(GO:0005634);BAF-type complex(GO:0090544)
Q92925	SWI/SNF-related matrix-associated actin-dependent regulator of chromatin subfamily D member 2	SMARCD2	SWI/SNF-RELATED MATRIX-ASSOCIATED ACTIN-DEPENDENT REGULATOR OF CHROMATIN SUBFAMILY D MEMBER 2 (PTHR13844:SF23)	chromatin binding(GO:0005488);nucleic acid binding(GO:0003682)	cellular process(GO:0009987);chromatin organization(GO:0071840);nucleobase-containing compound metabolic process(GO:0016043)		chromatin/chromatin-binding protein(PC00171)	Wnt signaling pathway->Switched/Sucrose Non Fermentation;;	transcription coactivator activity(GO:0003713);protein binding(GO:0005515);RNA polymerase II core promoter proximal region sequence-specific DNA binding(GO:0000978);RNA polymerase II distal enhancer sequence-specific DNA binding(GO:0000980);nucleosomal DNA binding(GO:0031492)	ATP-dependent chromatin remodeling(GO:0043044);nucleosome disassembly(GO:0006337);chromatin remodeling(GO:0006338);transcription, DNA-templated(GO:0006351);regulation of transcription from RNA polymerase II promoter(GO:0006357);regulation of transcription, DNA-templated(GO:0006355);chromatin organization(GO:0016568);covalent chromatin modification(GO:0016569)	nucleoplasm(GO:0005654);SWI/SNF complex(GO:0016514);nuclear chromatin(GO:0000790);protein complex(GO:0043234);nucleus(GO:0005634);BAF-type complex(GO:0090544)
Q6STE5	SWI/SNF-related matrix-associated actin-dependent regulator of chromatin subfamily D member 3	SMARCD3	SWI/SNF-RELATED MATRIX-ASSOCIATED ACTIN-DEPENDENT REGULATOR OF CHROMATIN SUBFAMILY D MEMBER 3 (PTHR13844:SF25)	chromatin binding(GO:0005488);nucleic acid binding(GO:0003682)	cellular process(GO:0009987);chromatin organization(GO:0071840);nucleobase-containing compound metabolic process(GO:0016043)		chromatin/chromatin-binding protein(PC00171)	Wnt signaling pathway->Switched/Sucrose Non Fermentation;;	chromatin binding(GO:0003682);transcription coactivator activity(GO:0003713);receptor binding(GO:0005102);protein binding(GO:0005515);transcription factor binding(GO:0008134);ligand-dependent nuclear receptor binding(GO:0016922);ligand-dependent nuclear receptor transcription coactivator activity(GO:0030374);nuclear hormone receptor binding(GO:0035257)	positive regulation of neuroblast proliferation(GO:0002052);secondary heart field specification(GO:0003139);cardiac right ventricle formation(GO:0003219);neural retina development(GO:0003407);nucleosome disassembly(GO:0006337);chromatin remodeling(GO:0006338);transcription, DNA-templated(GO:0006351);regulation of transcription from RNA polymerase II promoter(GO:0006357);positive regulation of G2/…	nuclear chromatin(GO:0000790);nucleus(GO:0005634);nucleoplasm(GO:0005654);cytoplasm(GO:0005737);SWI/SNF complex(GO:0016514);npBAF complex(GO:0071564);nBAF complex(GO:0071565);BAF-type complex(GO:0090544)
Q14683	Structural maintenance of chromosomes protein 1A	SMC1A	STRUCTURAL MAINTENANCE OF CHROMOSOMES PROTEIN 1A (PTHR18937:SF292)	chromatin binding(GO:0005488);hydrolase activity(GO:0003682);nucleic acid binding(GO:0003824)	DNA repair(GO:0008152);DNA replication(GO:0044238);chromatin organization(GO:0006139);chromosome segregation(GO:0006259);meiosis(GO:0006281);mitosis(GO:0006260)		chromatin/chromatin-binding protein(PC00171);hydrolase(PC00009)		chromatin binding(GO:0003682);ATP binding(GO:0005524);protein binding(GO:0005515);mediator complex binding(GO:0036033);poly(A) RNA binding(GO:0044822);protein heterodimerization activity(GO:0046982);nucleotide binding(GO:0000166)	DNA repair(GO:0006281);mitotic sister chromatid cohesion(GO:0007064);mitotic sister chromatid segregation(GO:0000070);mitotic spindle organization(GO:0007052);sister chromatid cohesion(GO:0007062);mitotic cell cycle checkpoint(GO:0007093);meiotic nuclear division(GO:0007126);response to radiation(GO:0009314);protein sumoylation(GO:0016925);stem cell population maintenance(GO:0019827);negative reg…	nucleus(GO:0005634);cohesin complex(GO:0008280);chromosome, centromeric region(GO:0000775);kinetochore(GO:0000776);condensed chromosome kinetochore(GO:0000777);condensed nuclear chromosome(GO:0000794);nucleoplasm(GO:0005654);chromosome(GO:0005694);cytoplasm(GO:0005737);cytosol(GO:0005829);meiotic cohesin complex(GO:0030893);cohesin complex(GO:0008278)
Q13573	SNW domain-containing protein 1	SNW1	SNW DOMAIN-CONTAINING PROTEIN 1 (PTHR12096:SF2)	sequence-specific DNA binding transcription factor activity(GO:0005488)	transcription from RNA polymerase II promoter(GO:0008152)		transcription factor(PC00218)		transcription coactivator activity(GO:0003713);transcription corepressor activity(GO:0003714);Notch binding(GO:0005112);protein binding(GO:0005515);nuclear hormone receptor binding(GO:0035257);vitamin D receptor binding(GO:0042809);retinoic acid receptor binding(GO:0042974);poly(A) RNA binding(GO:0044822);SMAD binding(GO:0046332)	mRNA splicing, via spliceosome(GO:0000398);negative regulation of transcription from RNA polymerase II promoter(GO:0000122);regulation of transcription from RNA polymerase II promoter(GO:0006357);transcription initiation from RNA polymerase II promoter(GO:0006367);Notch signaling pathway(GO:0007219);viral process(GO:0016032);positive regulation of transforming growth factor beta receptor signalin…	nucleoplasm(GO:0005654);spliceosomal complex(GO:0005681);chromatin(GO:0000785);nucleus(GO:0005634);nuclear matrix(GO:0016363);catalytic step 2 spliceosome(GO:0071013);cyclin/CDK positive transcription elongation factor complex(GO:0008024);SMAD3-SMAD4 protein complex(GO:0071146);SMAD protein complex(GO:0071141);cytoplasm(GO:0005737)
Q13813	Spectrin alpha chain, non-erythrocytic 1	SPTAN1	SPECTRIN ALPHA CHAIN, NON-ERYTHROCYTIC 1 (PTHR11915:SF384)	actin binding(GO:0005488);structural constituent of cytoskeleton(GO:0005515)	cellular process(GO:0009987)	intracellular(GO:0044464)	non-motor actin binding protein(PC00085)		calcium ion binding(GO:0005509);actin binding(GO:0003779);Ras guanyl-nucleotide exchange factor activity(GO:0005088);structural constituent of cytoskeleton(GO:0005200);protein binding(GO:0005515);calmodulin binding(GO:0005516);syntaxin binding(GO:0019905);protein complex binding(GO:0032403);protein N-terminus binding(GO:0047485);metal ion binding(GO:0046872);cadherin binding involved in cell-cell…	MAPK cascade(GO:0000165);ER to Golgi vesicle-mediated transport(GO:0006888);axon guidance(GO:0007411);actin cytoskeleton reorganization(GO:0031532);positive regulation of GTPase activity(GO:0043547);actin filament capping(GO:0051693);cytoskeleton organization(GO:0007010);cell-cell adhesion(GO:0098609)	cytosol(GO:0005829);plasma membrane(GO:0005886);spectrin(GO:0008091);microtubule cytoskeleton(GO:0015630);membrane(GO:0016020);intracellular membrane-bounded organelle(GO:0043231);protein complex(GO:0043234);extracellular exosome(GO:0070062);extracellular vesicle(GO:1903561);cytoplasm(GO:0005737);cytoskeleton(GO:0005856);cell cortex(GO:0005938);cell-cell adherens junction(GO:0005913)
Q01082	Spectrin beta chain, non-erythrocytic 1	SPTBN1	SPECTRIN BETA CHAIN, NON-ERYTHROCYTIC 1 (PTHR11915:SF343)	actin binding(GO:0005488);structural constituent of cytoskeleton(GO:0005515)	anatomical structure morphogenesis(GO:0032502);cellular process(GO:0009653)	intracellular(GO:0044464)	non-motor actin binding protein(PC00085)		actin binding(GO:0003779);structural constituent of cytoskeleton(GO:0005200);phospholipid binding(GO:0005543);Ras guanyl-nucleotide exchange factor activity(GO:0005088);protein binding(GO:0005515);calmodulin binding(GO:0005516);ankyrin binding(GO:0030506);poly(A) RNA binding(GO:0044822);GTPase binding(GO:0051020);protein complex binding(GO:0032403);cadherin binding involved in cell-cell adhesion(…	MAPK cascade(GO:0000165);mitotic cytokinesis(GO:0000281);ER to Golgi vesicle-mediated transport(GO:0006888);plasma membrane organization(GO:0007009);common-partner SMAD protein phosphorylation(GO:0007182);SMAD protein import into nucleus(GO:0007184);axon guidance(GO:0007411);Golgi to plasma membrane protein transport(GO:0043001);positive regulation of GTPase activity(GO:0043547);actin filament ca…	spectrin(GO:0008091);nucleolus(GO:0005730);cytoplasm(GO:0005737);cytosol(GO:0005829);spectrin-associated cytoskeleton(GO:0014731);axolemma(GO:0030673);M band(GO:0031430);cuticular plate(GO:0032437);extracellular exosome(GO:0070062);postsynaptic density(GO:0097481);nucleus(GO:0005634);plasma membrane(GO:0005886);membrane(GO:0016020);cortical cytoskeleton(GO:0030863);cytoskeleton(GO:0005856);cell-c…
P31948	Stress-induced-phosphoprotein 1	STIP1	STRESS-INDUCED-PHOSPHOPROTEIN 1 (PTHR22904:SF438)		protein folding(GO:0008152);response to stress(GO:0044238)		chaperone(PC00072)		protein binding(GO:0005515);protein C-terminus binding(GO:0008022);Hsp70 protein binding(GO:0030544);poly(A) RNA binding(GO:0044822);chaperone binding(GO:0051087)	response to stress(GO:0006950)	nucleus(GO:0005634);Golgi apparatus(GO:0005794);myelin sheath(GO:0043209);protein complex(GO:0043234);cytoplasm(GO:0005737)
Q93045	Stathmin-2	STMN2	STATHMIN-2 (PTHR10104:SF27)	cytoskeletal protein binding(GO:0005488)	cell differentiation(GO:0032502);cellular process(GO:0030154);cytoskeleton organization(GO:0009987);nervous system development(GO:0071840);regulation of biological process(GO:0016043);single-multicellular organism process(GO:0006996)	cytoplasm(GO:0044464);neuron projection(GO:0005622)			protein binding(GO:0005515);tubulin binding(GO:0015631);calcium-dependent protein binding(GO:0048306)	regulation of microtubule polymerization or depolymerization(GO:0031110);negative regulation of microtubule depolymerization(GO:0007026);positive regulation of neuron projection development(GO:0010976);negative regulation of neuron projection development(GO:0010977);negative regulation of microtubule polymerization(GO:0031115);positive regulation of microtubule depolymerization(GO:0031117);cellul…	cytoplasm(GO:0005737);endosome(GO:0005768);Golgi apparatus(GO:0005794);membrane(GO:0016020);lamellipodium(GO:0030027);axon(GO:0030424);growth cone(GO:0030426);vesicle(GO:0031982);neuron projection(GO:0043005);neuronal cell body(GO:0043025);perinuclear region of cytoplasm(GO:0048471);cell projection(GO:0042995)
P08247	Synaptophysin	SYP	SYNAPTOPHYSIN (PTHR10306:SF25)		neurological system process(GO:0032501);regulation of biological process(GO:0044707);synaptic transmission(GO:0003008)	cytoplasm(GO:0044464);cytoplasmic membrane-bounded vesicle(GO:0005622);integral to membrane(GO:0005737);synapse(GO:0043226)	membrane trafficking regulatory protein(PC00150)	Synaptic vesicle trafficking->Synaptophysin;;	transporter activity(GO:0005215);cholesterol binding(GO:0015485);SH2 domain binding(GO:0042169);identical protein binding(GO:0042802);protein self-association(GO:0043621)	transport(GO:0006810);regulation of neuronal synaptic plasticity(GO:0048168);endocytosis(GO:0006897);synaptic vesicle maturation(GO:0016188);regulation of long-term neuronal synaptic plasticity(GO:0048169);regulation of short-term neuronal synaptic plasticity(GO:0048172);synaptic vesicle membrane organization(GO:0048499);cellular response to organic substance(GO:0071310);regulation of opioid rece…	synaptic vesicle(GO:0008021);membrane(GO:0016020);integral component of membrane(GO:0016021);cell junction(GO:0030054);integral component of synaptic vesicle membrane(GO:0030285);synaptic vesicle membrane(GO:0030672);presynaptic membrane(GO:0042734);neuron projection(GO:0043005);terminal bouton(GO:0043195);presynaptic active zone(GO:0048786);excitatory synapse(GO:0060076);cytoplasmic vesicle(GO:0…
Q9Y490	Talin-1	TLN1	TALIN-1 (PTHR19981:SF24)	structural constituent of cytoskeleton(GO:0005198)	cellular component morphogenesis(GO:0071840);cellular process(GO:0016043)	actin cytoskeleton(GO:0043226);intracellular(GO:0005856)	actin family cytoskeletal protein(PC00085);cell adhesion molecule(PC00041)	Integrin signalling pathway->Talin;;	integrin binding(GO:0005178);structural constituent of cytoskeleton(GO:0005200);protein binding(GO:0005515);vinculin binding(GO:0017166);LIM domain binding(GO:0030274);actin filament binding(GO:0051015);actin binding(GO:0003779);protein complex binding(GO:0032403);cadherin binding involved in cell-cell adhesion(GO:0098641)	platelet degranulation(GO:0002576);movement of cell or subcellular component(GO:0006928);muscle contraction(GO:0006936);cytoskeletal anchoring at plasma membrane(GO:0007016);cell-cell junction assembly(GO:0007043);cell-substrate junction assembly(GO:0007044);viral process(GO:0016032);cortical actin cytoskeleton organization(GO:0030866);IRE1-mediated unfolded protein response(GO:0036498);platelet …	ruffle(GO:0001726);extracellular region(GO:0005576);cytoplasm(GO:0005737);microtubule organizing center(GO:0005815);cytosol(GO:0005829);plasma membrane(GO:0005886);cell-cell junction(GO:0005911);focal adhesion(GO:0005925);cell surface(GO:0009986);ruffle membrane(GO:0032587);extracellular exosome(GO:0070062);cytoskeleton(GO:0005856);membrane(GO:0016020);cell junction(GO:0030054);cell projection(GO…
Q86WT6	E3 ubiquitin-protein ligase TRIM69	TRIM69	E3 UBIQUITIN-PROTEIN LIGASE TRIM69 (PTHR24103:SF492)						zinc ion binding(GO:0008270);ubiquitin-protein transferase activity(GO:0004842);protein binding(GO:0005515);ligase activity(GO:0016874);metal ion binding(GO:0046872)	protein polyubiquitination(GO:0000209);apoptotic process(GO:0006915);protein ubiquitination(GO:0016567)	intracellular(GO:0005622);nucleus(GO:0005634);nucleolus(GO:0005730);Golgi apparatus(GO:0005794);plasma membrane(GO:0005886);intracellular membrane-bounded organelle(GO:0043231);cytoplasm(GO:0005737);cytosol(GO:0005829);nuclear speck(GO:0016607)
Q9BTX7	Alpha-tocopherol transfer protein-like	TTPAL	ALPHA-TOCOPHEROL TRANSFER PROTEIN-LIKE (PTHR10174:SF189)	oxidoreductase activity(GO:0003824)	intracellular protein transport(GO:0051179);regulation of cellular amino acid metabolic process(GO:0006810)		dehydrogenase(PC00176);transfer/carrier protein(PC00092)		transporter activity(GO:0005215)	transport(GO:0006810)	intracellular(GO:0005622);membrane(GO:0016020)
Q71U36	Tubulin alpha-1A chain	TUBA1A	TUBULIN ALPHA-1A CHAIN (PTHR11588:SF193)	structural constituent of cytoskeleton(GO:0005198)	cellular component morphogenesis(GO:0071840);cellular component movement(GO:0016043);chromosome segregation(GO:0032989);intracellular protein transport(GO:0009987);mitosis(GO:0006928)	intracellular(GO:0044464);microtubule(GO:0005622);tubulin complex(GO:0043226)	tubulin(PC00085)	Gonadotropin-releasing hormone receptor pathway->Tubulin;;	GTPase activity(GO:0003924);structural constituent of cytoskeleton(GO:0005200);GTP binding(GO:0005525);structural molecule activity(GO:0005198);protein binding(GO:0005515);protein domain specific binding(GO:0019904);nucleotide binding(GO:0000166)	microtubule-based process(GO:0007017);G2/M transition of mitotic cell cycle(GO:0000086);cytoskeleton-dependent intracellular transport(GO:0030705);cell division(GO:0051301);cytoskeleton organization(GO:0007010)	microtubule(GO:0005874);nucleus(GO:0005634);cytosol(GO:0005829);cytoplasmic microtubule(GO:0005881);cytoplasmic ribonucleoprotein granule(GO:0036464);myelin sheath(GO:0043209);recycling endosome(GO:0055037);extracellular exosome(GO:0070062);cytoplasm(GO:0005737);cytoskeleton(GO:0005856)
P68363	Tubulin alpha-1B chain	TUBA1B	TUBULIN ALPHA-1B CHAIN (PTHR11588:SF166)	structural constituent of cytoskeleton(GO:0005198)	cellular component morphogenesis(GO:0071840);cellular component movement(GO:0016043);chromosome segregation(GO:0032989);intracellular protein transport(GO:0009987);mitosis(GO:0006928)	intracellular(GO:0044464);microtubule(GO:0005622);tubulin complex(GO:0043226)	tubulin(PC00085)	Gonadotropin-releasing hormone receptor pathway->Tubulin;;	GTPase activity(GO:0003924);GTP binding(GO:0005525);structural constituent of cytoskeleton(GO:0005200);double-stranded RNA binding(GO:0003725);structural molecule activity(GO:0005198);protein binding(GO:0005515);ubiquitin protein ligase binding(GO:0031625);nucleotide binding(GO:0000166)	microtubule-based process(GO:0007017);microtubule cytoskeleton organization(GO:0000226);cytoskeleton-dependent intracellular transport(GO:0030705);cell division(GO:0051301);cellular response to interleukin-4(GO:0071353);cytoskeleton organization(GO:0007010)	microtubule(GO:0005874);cytoplasmic microtubule(GO:0005881);myelin sheath(GO:0043209);extracellular exosome(GO:0070062);cytoplasm(GO:0005737);cytoskeleton(GO:0005856)
P08670	Vimentin	VIM	VIMENTIN (PTHR23239:SF258)	structural constituent of cytoskeleton(GO:0005198)	cellular component morphogenesis(GO:0071840);cellular process(GO:0016043)	intermediate filament cytoskeleton(GO:0043226);intracellular(GO:0005856)	intermediate filament(PC00085);structural protein(PC00129)		structural molecule activity(GO:0005198);glycoprotein binding(GO:0001948);double-stranded RNA binding(GO:0003725);structural constituent of cytoskeleton(GO:0005200);structural constituent of eye lens(GO:0005212);protein binding(GO:0005515);protein C-terminus binding(GO:0008022);identical protein binding(GO:0042802);scaffold protein binding(GO:0097110);keratin filament binding(GO:1990254)	movement of cell or subcellular component(GO:0006928);positive regulation of gene expression(GO:0010628);negative regulation of neuron projection development(GO:0010977);astrocyte development(GO:0014002);viral process(GO:0016032);muscle filament sliding(GO:0030049);intermediate filament organization(GO:0045109);Bergmann glial cell differentiation(GO:0060020);SMAD protein signal transduction(GO:00…	intermediate filament(GO:0005882);cytoplasm(GO:0005737);peroxisome(GO:0005777);cytosol(GO:0005829);cytoskeleton(GO:0005856);focal adhesion(GO:0005925);cell leading edge(GO:0031252);neuron projection(GO:0043005);intermediate filament cytoskeleton(GO:0045111);extracellular exosome(GO:0070062);plasma membrane(GO:0005886);cell projection(GO:0042995);extracellular matrix(GO:0031012)
