# Supplementary material for: Role of the visual experience-dependent nascent proteome in neuronal plasticity
Source: eLife. 2018 Feb 7;7:e33420. doi: 10.7554/eLife.33420 (PMC5815848; doi:10.7554/eLife.33420)
Supplement: Supplementary file 4. — Related to Table 1. We identified the enriched GO annotation using both human and mouse protein interaction databases provided by STRING. [file elife-33420-supp4.xlsx]

## Sheet: STRING_enriched BP_Hum
#pathway ID	pathway description	observed gene count	false discovery rate	matching proteins in your network (IDs)	matching proteins in your network (labels)
GO.0006338	chromatin remodeling	9	0.000163	ENSP00000262188,ENSP00000319690,ENSP00000336687,ENSP00000344456,ENSP00000349960,ENSP00000352980,ENSP00000378307,ENSP00000378414,ENSP00000392617	ACTB	CBX3	CTNNB1	HIST1H4A	HNRNPC	PBRM1	SMARCD1	SMARCD2	SMARCD3
GO.0016192	vesicle-mediated transport	18	0.000458	ENSP00000263233,ENSP00000263710,ENSP00000263934,ENSP00000273047,ENSP00000316029,ENSP00000318195,ENSP00000320821,ENSP00000322791,ENSP00000324173,ENSP00000325875,ENSP00000331514,ENSP00000344456,ENSP00000345689,ENSP00000349259,ENSP00000349960,ENSP00000353444,ENSP00000413234,ENSP00000450399	ACTB	ACTG1	AP2A2	CLASP1	CTNNB1	DNM1L	HSP90AB1	HSPA5	KIF1A	KIF1B	KIF1C	NCL	RAB5A	RAB5B	RAB5C	SPTBN1	SYP	TLN1
GO.0043933	macromolecular complex subunit organization	25	0.000458	ENSP00000224237,ENSP00000262188,ENSP00000263168,ENSP00000263710,ENSP00000299218,ENSP00000301071,ENSP00000319690,ENSP00000323421,ENSP00000336687,ENSP00000336799,ENSP00000343690,ENSP00000344456,ENSP00000346045,ENSP00000349748,ENSP00000349960,ENSP00000352980,ENSP00000353826,ENSP00000354947,ENSP00000355645,ENSP00000358140,ENSP00000378307,ENSP00000378414,ENSP00000392617,ENSP00000429243,ENSP00000450399	ACTA1	ACTB	CAND1	CAPZA1	CAPZA2	CBX3	CLASP1	CTNNB1	DNM1L	DPYSL3	EIF3A	HIST1H4A	HNRNPC	LONP1	PBRM1	RPS17	SFPQ	SMARCD1	SMARCD2	SMARCD3	SMC1A	STMN2	TUBA1A	TUBA1B	VIM
GO.1901880	negative regulation of protein depolymerization	6	0.000458	ENSP00000263168,ENSP00000263710,ENSP00000349259,ENSP00000354947,ENSP00000361824,ENSP00000429243	CAPZA1	CAPZA2	CLASP1	SPTAN1	SPTBN1	STMN2
GO.0016071	mRNA metabolic process	13	0.0006	ENSP00000230640,ENSP00000247026,ENSP00000254108,ENSP00000261531,ENSP00000276079,ENSP00000293831,ENSP00000295321,ENSP00000319690,ENSP00000323421,ENSP00000346045,ENSP00000349748,ENSP00000352438,ENSP00000383168	EIF4A1	FUS	HNRNPC	IWS1	NONO	NSRP1	PCBP2	PCBP3	RPS17	SFPQ	SKIV2L2	SMC1A	SNW1
GO.0008380	RNA splicing	10	0.0011	ENSP00000230640,ENSP00000247026,ENSP00000254108,ENSP00000261531,ENSP00000276079,ENSP00000295321,ENSP00000319690,ENSP00000323421,ENSP00000349748,ENSP00000352438	FUS	HNRNPC	IWS1	NONO	NSRP1	PCBP2	SFPQ	SKIV2L2	SMC1A	SNW1
GO.0090131	mesenchyme migration	3	0.0011	ENSP00000224784,ENSP00000290378,ENSP00000355645	ACTA1	ACTA2	ACTC1
GO.0044087	regulation of cellular component biogenesis	13	0.00118	ENSP00000263168,ENSP00000263710,ENSP00000273047,ENSP00000299218,ENSP00000318195,ENSP00000343690,ENSP00000344456,ENSP00000349259,ENSP00000354947,ENSP00000361824,ENSP00000401802,ENSP00000429243,ENSP00000450399	CAND1	CAPZA1	CAPZA2	CLASP1	CTNNB1	DNM1L	DPYSL3	NCL	PSMC6	RAB5A	SPTAN1	SPTBN1	STMN2
GO.0000904	cell morphogenesis involved in differentiation	13	0.00139	ENSP00000263710,ENSP00000268603,ENSP00000316029,ENSP00000325875,ENSP00000331514,ENSP00000343690,ENSP00000347532,ENSP00000347665,ENSP00000349259,ENSP00000349960,ENSP00000351108,ENSP00000361824,ENSP00000413234	ACTB	ACTG1	AP2A2	CDH11	CLASP1	COL18A1	DPYSL3	HNRNPAB	HSP90AB1	KIAA1598	SPTAN1	SPTBN1	TLN1
GO.0006928	movement of cell or subcellular component	18	0.00143	ENSP00000224237,ENSP00000263168,ENSP00000263710,ENSP00000290378,ENSP00000316029,ENSP00000320821,ENSP00000322791,ENSP00000325875,ENSP00000331514,ENSP00000343690,ENSP00000344456,ENSP00000347532,ENSP00000349259,ENSP00000349960,ENSP00000354947,ENSP00000355645,ENSP00000361824,ENSP00000413234	ACTA1	ACTB	ACTC1	ACTG1	AP2A2	CAPZA1	CAPZA2	CLASP1	CTNNB1	DPYSL3	HSP90AB1	KIAA1598	KIF1A	KIF1C	SPTAN1	SPTBN1	TLN1	VIM
GO.0006810	transport	30	0.00165	ENSP00000247026,ENSP00000256103,ENSP00000258091,ENSP00000262605,ENSP00000263710,ENSP00000273047,ENSP00000295321,ENSP00000301071,ENSP00000312042,ENSP00000316029,ENSP00000317780,ENSP00000318195,ENSP00000320821,ENSP00000322791,ENSP00000325875,ENSP00000331514,ENSP00000336799,ENSP00000341826,ENSP00000344456,ENSP00000345689,ENSP00000346045,ENSP00000349259,ENSP00000349595,ENSP00000349960,ENSP00000353444…	ACTB	ACTG1	AP2A2	ATP2A1	ATP2A2	CCT7	CLASP1	COX5A	CTNNB1	DNM1L	HDLBP	HK1	HNRNPA1	HSP90AB1	IWS1	KIF1A	KIF1C	NACA	NCL	NSRP1	PMP2	RAB5A	RAB5B	RAB5C	RPS17	SPTBN1	TLN1	TTPAL	TUBA1A	TUBA1B
GO.0043254	regulation of protein complex assembly	9	0.0019	ENSP00000263168,ENSP00000299218,ENSP00000344456,ENSP00000349259,ENSP00000354947,ENSP00000361824,ENSP00000401802,ENSP00000429243,ENSP00000450399	CAND1	CAPZA1	CAPZA2	CTNNB1	DNM1L	PSMC6	SPTAN1	SPTBN1	STMN2
GO.0007409	axonogenesis	11	0.00206	ENSP00000263710,ENSP00000268603,ENSP00000316029,ENSP00000325875,ENSP00000331514,ENSP00000343690,ENSP00000347532,ENSP00000349259,ENSP00000349960,ENSP00000361824,ENSP00000413234	ACTB	ACTG1	AP2A2	CDH11	CLASP1	DPYSL3	HSP90AB1	KIAA1598	SPTAN1	SPTBN1	TLN1
GO.0007411	axon guidance	10	0.00206	ENSP00000263710,ENSP00000316029,ENSP00000325875,ENSP00000331514,ENSP00000343690,ENSP00000347532,ENSP00000349259,ENSP00000349960,ENSP00000361824,ENSP00000413234	ACTB	ACTG1	AP2A2	CLASP1	DPYSL3	HSP90AB1	KIAA1598	SPTAN1	SPTBN1	TLN1
GO.0006397	mRNA processing	10	0.0022	ENSP00000230640,ENSP00000247026,ENSP00000254108,ENSP00000261531,ENSP00000276079,ENSP00000295321,ENSP00000319690,ENSP00000323421,ENSP00000349748,ENSP00000352438	FUS	HNRNPC	IWS1	NONO	NSRP1	PCBP2	SFPQ	SKIV2L2	SMC1A	SNW1
GO.0032272	negative regulation of protein polymerization	5	0.0022	ENSP00000263168,ENSP00000349259,ENSP00000354947,ENSP00000361824,ENSP00000429243	CAPZA1	CAPZA2	SPTAN1	SPTBN1	STMN2
GO.0061564	axon development	11	0.0022	ENSP00000263710,ENSP00000268603,ENSP00000316029,ENSP00000325875,ENSP00000331514,ENSP00000343690,ENSP00000347532,ENSP00000349259,ENSP00000349960,ENSP00000361824,ENSP00000413234	ACTB	ACTG1	AP2A2	CDH11	CLASP1	DPYSL3	HSP90AB1	KIAA1598	SPTAN1	SPTBN1	TLN1
GO.0071353	cellular response to interleukin-4	4	0.00247	ENSP00000304592,ENSP00000324173,ENSP00000325875,ENSP00000336799	FASN	HSP90AB1	HSPA5	TUBA1B
GO.0048468	cell development	19	0.0029	ENSP00000224237,ENSP00000224784,ENSP00000263710,ENSP00000268603,ENSP00000316029,ENSP00000323421,ENSP00000325875,ENSP00000343690,ENSP00000344456,ENSP00000347532,ENSP00000347665,ENSP00000349259,ENSP00000349960,ENSP00000351108,ENSP00000355645,ENSP00000361824,ENSP00000413234,ENSP00000429243,ENSP00000440045	ACTA1	ACTA2	ACTB	AP2A2	ATP2A2	CDH11	CLASP1	COL18A1	CTNNB1	DPYSL3	HNRNPAB	HSP90AB1	KIAA1598	SMC1A	SPTAN1	SPTBN1	STMN2	TLN1	VIM
GO.0048667	cell morphogenesis involved in neuron differentiation	11	0.00292	ENSP00000263710,ENSP00000268603,ENSP00000316029,ENSP00000325875,ENSP00000331514,ENSP00000343690,ENSP00000347532,ENSP00000349259,ENSP00000349960,ENSP00000361824,ENSP00000413234	ACTB	ACTG1	AP2A2	CDH11	CLASP1	DPYSL3	HSP90AB1	KIAA1598	SPTAN1	SPTBN1	TLN1
GO.0051494	negative regulation of cytoskeleton organization	6	0.00339	ENSP00000263168,ENSP00000263710,ENSP00000349259,ENSP00000354947,ENSP00000361824,ENSP00000429243	CAPZA1	CAPZA2	CLASP1	SPTAN1	SPTBN1	STMN2
GO.0031175	neuron projection development	12	0.00344	ENSP00000263710,ENSP00000268603,ENSP00000316029,ENSP00000325875,ENSP00000331514,ENSP00000343690,ENSP00000347532,ENSP00000349259,ENSP00000349960,ENSP00000361824,ENSP00000413234,ENSP00000429243	ACTB	ACTG1	AP2A2	CDH11	CLASP1	DPYSL3	HSP90AB1	KIAA1598	SPTAN1	SPTBN1	STMN2	TLN1
GO.0051693	actin filament capping	4	0.00347	ENSP00000263168,ENSP00000349259,ENSP00000354947,ENSP00000361824	CAPZA1	CAPZA2	SPTAN1	SPTBN1
GO.0071840	cellular component organization or biogenesis	35	0.00537	ENSP00000230640,ENSP00000256103,ENSP00000262105,ENSP00000262188,ENSP00000263233,ENSP00000263574,ENSP00000263710,ENSP00000273047,ENSP00000299218,ENSP00000319690,ENSP00000323421,ENSP00000325875,ENSP00000336687,ENSP00000336799,ENSP00000343690,ENSP00000344456,ENSP00000346045,ENSP00000347532,ENSP00000349259,ENSP00000349595,ENSP00000349748,ENSP00000349960,ENSP00000351108,ENSP00000352980,ENSP00000353826…	ACTA1	ACTB	AP2A2	APLP2	ATP2A1	ATP2A2	CAND1	CBX3	CLASP1	CTNNB1	DNM1L	DPYSL3	EIF3A	HIST1H4A	HNRNPAB	HNRNPC	HSP90AB1	KIAA1598	LONP1	MCM4	PBRM1	PMP2	RAB5A	RPS17	SFPQ	SKIV2L2	SMARCD1	SMARCD2	SMARCD3	SMC1A	SPTAN1	SPTBN1	STMN2	SYP	TUBA1B
GO.0016032	viral process	12	0.00623	ENSP00000224237,ENSP00000261531,ENSP00000293831,ENSP00000310129,ENSP00000316029,ENSP00000325875,ENSP00000329243,ENSP00000341826,ENSP00000346045,ENSP00000401802,ENSP00000413234,ENSP00000448035	AP2A2	EIF4A1	HNRNPA1	HSP90AB1	KRT7	NACA	PSMC6	PSMD2	RPS17	SNW1	TLN1	VIM
GO.0032470	positive regulation of endoplasmic reticulum calcium ion concentration	2	0.00623	ENSP00000349595,ENSP00000440045	ATP2A1	ATP2A2
GO.0071822	protein complex subunit organization	17	0.00623	ENSP00000224237,ENSP00000262188,ENSP00000263168,ENSP00000263710,ENSP00000299218,ENSP00000301071,ENSP00000323421,ENSP00000336799,ENSP00000343690,ENSP00000346045,ENSP00000353826,ENSP00000354947,ENSP00000355645,ENSP00000378414,ENSP00000392617,ENSP00000429243,ENSP00000450399	ACTA1	CAND1	CAPZA1	CAPZA2	CLASP1	DNM1L	DPYSL3	LONP1	RPS17	SMARCD1	SMARCD2	SMARCD3	SMC1A	STMN2	TUBA1A	TUBA1B	VIM
GO.0006996	organelle organization	25	0.00752	ENSP00000224237,ENSP00000262105,ENSP00000262188,ENSP00000263233,ENSP00000263710,ENSP00000301071,ENSP00000319690,ENSP00000323421,ENSP00000331514,ENSP00000336687,ENSP00000336799,ENSP00000343690,ENSP00000346045,ENSP00000349595,ENSP00000349748,ENSP00000349960,ENSP00000352980,ENSP00000353826,ENSP00000355645,ENSP00000378307,ENSP00000378414,ENSP00000392617,ENSP00000429243,ENSP00000440045,ENSP00000450399	ACTA1	ACTB	ACTG1	ATP2A1	ATP2A2	CBX3	CLASP1	DNM1L	DPYSL3	HIST1H4A	HNRNPC	LONP1	MCM4	PBRM1	RPS17	SFPQ	SMARCD1	SMARCD2	SMARCD3	SMC1A	STMN2	SYP	TUBA1A	TUBA1B	VIM
GO.0016043	cellular component organization	34	0.00752	ENSP00000256103,ENSP00000262105,ENSP00000262188,ENSP00000263233,ENSP00000263574,ENSP00000263710,ENSP00000273047,ENSP00000299218,ENSP00000319690,ENSP00000323421,ENSP00000325875,ENSP00000336687,ENSP00000336799,ENSP00000343690,ENSP00000344456,ENSP00000346045,ENSP00000347532,ENSP00000349259,ENSP00000349595,ENSP00000349748,ENSP00000349960,ENSP00000351108,ENSP00000352980,ENSP00000353826,ENSP00000355645…	ACTA1	ACTB	AP2A2	APLP2	ATP2A1	ATP2A2	CAND1	CBX3	CLASP1	CTNNB1	DNM1L	DPYSL3	EIF3A	HIST1H4A	HNRNPAB	HNRNPC	HSP90AB1	KIAA1598	LONP1	MCM4	PBRM1	PMP2	RAB5A	RPS17	SFPQ	SMARCD1	SMARCD2	SMARCD3	SMC1A	SPTAN1	SPTBN1	STMN2	SYP	TUBA1B
GO.0000398	mRNA splicing, via spliceosome	7	0.00756	ENSP00000230640,ENSP00000254108,ENSP00000261531,ENSP00000319690,ENSP00000323421,ENSP00000349748,ENSP00000352438	FUS	HNRNPC	PCBP2	SFPQ	SKIV2L2	SMC1A	SNW1
GO.0032989	cellular component morphogenesis	14	0.00812	ENSP00000263710,ENSP00000268603,ENSP00000316029,ENSP00000325875,ENSP00000343690,ENSP00000347532,ENSP00000347665,ENSP00000349259,ENSP00000349960,ENSP00000351108,ENSP00000355645,ENSP00000361824,ENSP00000413234,ENSP00000450399	ACTA1	ACTB	AP2A2	CDH11	CLASP1	COL18A1	DNM1L	DPYSL3	HNRNPAB	HSP90AB1	KIAA1598	SPTAN1	SPTBN1	TLN1
GO.0022411	cellular component disassembly	10	0.00833	ENSP00000224237,ENSP00000262188,ENSP00000344456,ENSP00000346045,ENSP00000347665,ENSP00000361824,ENSP00000378414,ENSP00000392617,ENSP00000429243,ENSP00000450399	COL18A1	CTNNB1	DNM1L	RPS17	SMARCD1	SMARCD2	SMARCD3	SPTAN1	STMN2	VIM
GO.0032990	cell part morphogenesis	12	0.00897	ENSP00000263710,ENSP00000268603,ENSP00000316029,ENSP00000325875,ENSP00000331514,ENSP00000343690,ENSP00000347532,ENSP00000349259,ENSP00000349960,ENSP00000361824,ENSP00000413234,ENSP00000450399	ACTB	ACTG1	AP2A2	CDH11	CLASP1	DNM1L	DPYSL3	HSP90AB1	KIAA1598	SPTAN1	SPTBN1	TLN1
GO.0016568	chromatin modification	10	0.0106	ENSP00000262188,ENSP00000319690,ENSP00000336687,ENSP00000344456,ENSP00000349748,ENSP00000349960,ENSP00000352980,ENSP00000378307,ENSP00000378414,ENSP00000392617	ACTB	CBX3	CTNNB1	HIST1H4A	HNRNPC	PBRM1	SFPQ	SMARCD1	SMARCD2	SMARCD3
GO.0006337	nucleosome disassembly	3	0.0109	ENSP00000262188,ENSP00000378414,ENSP00000392617	SMARCD1	SMARCD2	SMARCD3
GO.0031498	chromatin disassembly	3	0.0109	ENSP00000262188,ENSP00000378414,ENSP00000392617	SMARCD1	SMARCD2	SMARCD3
GO.0051084	de novo posttranslational protein folding	4	0.0109	ENSP00000258091,ENSP00000301071,ENSP00000336799,ENSP00000349960	ACTB	CCT7	TUBA1A	TUBA1B
GO.0048519	negative regulation of biological process	31	0.0111	ENSP00000224237,ENSP00000261531,ENSP00000263168,ENSP00000263574,ENSP00000263710,ENSP00000276079,ENSP00000290378,ENSP00000299218,ENSP00000307479,ENSP00000310129,ENSP00000318195,ENSP00000323421,ENSP00000336687,ENSP00000343690,ENSP00000344456,ENSP00000347665,ENSP00000349259,ENSP00000349595,ENSP00000349748,ENSP00000351108,ENSP00000352438,ENSP00000352980,ENSP00000354947,ENSP00000361824,ENSP00000378307…	ACTC1	AP2A2	APLP2	ARNT2	ATP2A1	ATP2A2	CAND1	CAPZA1	CAPZA2	CBX3	CLASP1	COL18A1	CTNNB1	CXXC4	DPYSL3	HIST1H4A	HNRNPAB	NACA	NCL	NONO	PBRM1	PCBP2	PSMC6	PSMD2	SFPQ	SMC1A	SNW1	SPTAN1	SPTBN1	STMN2	VIM
GO.0048666	neuron development	12	0.0111	ENSP00000263710,ENSP00000268603,ENSP00000316029,ENSP00000325875,ENSP00000331514,ENSP00000343690,ENSP00000347532,ENSP00000349259,ENSP00000349960,ENSP00000361824,ENSP00000413234,ENSP00000429243	ACTB	ACTG1	AP2A2	CDH11	CLASP1	DPYSL3	HSP90AB1	KIAA1598	SPTAN1	SPTBN1	STMN2	TLN1
GO.0009653	anatomical structure morphogenesis	20	0.0126	ENSP00000224784,ENSP00000262188,ENSP00000263710,ENSP00000268603,ENSP00000290378,ENSP00000316029,ENSP00000318195,ENSP00000324173,ENSP00000325875,ENSP00000343690,ENSP00000344456,ENSP00000347532,ENSP00000349259,ENSP00000349960,ENSP00000351108,ENSP00000355645,ENSP00000361824,ENSP00000413234,ENSP00000448035,ENSP00000450399	ACTA1	ACTA2	ACTB	ACTC1	AP2A2	CDH11	CLASP1	CTNNB1	DNM1L	DPYSL3	HNRNPAB	HSP90AB1	HSPA5	KIAA1598	NACA	NCL	SMARCD3	SPTAN1	SPTBN1	TLN1
GO.0050896	response to stimulus	42	0.0126	ENSP00000224237,ENSP00000224784,ENSP00000254108,ENSP00000261531,ENSP00000263168,ENSP00000263233,ENSP00000263574,ENSP00000263710,ENSP00000265174,ENSP00000273047,ENSP00000276079,ENSP00000293831,ENSP00000304592,ENSP00000305958,ENSP00000310129,ENSP00000316029,ENSP00000318195,ENSP00000323421,ENSP00000324173,ENSP00000325312,ENSP00000336799,ENSP00000343690,ENSP00000344456,ENSP00000345689,ENSP00000347532…	ACTA2	ACTB	AP2A2	APLP2	ATP2A1	ATP2A2	CAPZA1	CAPZA2	CLASP1	COL18A1	CTNNB1	CXXC4	DNM1L	DPYSL3	EIF4A1	FASN	FUS	HIST1H4A	HSPA5	KIAA1598	METAP2	NACA	NCL	NONO	PAPSS1	PCBP2	PSMC6	PSMD2	RAB5A	RAB5B	RAB5C	SFPQ	SMARCD1	SMC1A	SNW1	SPTAN1	STIP1	STMN2	SYP	TLN1	TUBA1B	VIM
GO.0051716	cellular response to stimulus	38	0.0138	ENSP00000224237,ENSP00000254108,ENSP00000261531,ENSP00000263233,ENSP00000263574,ENSP00000263710,ENSP00000265174,ENSP00000273047,ENSP00000276079,ENSP00000293831,ENSP00000304592,ENSP00000307479,ENSP00000310129,ENSP00000316029,ENSP00000318195,ENSP00000323421,ENSP00000324173,ENSP00000325312,ENSP00000331514,ENSP00000334052,ENSP00000336799,ENSP00000343690,ENSP00000344456,ENSP00000345689,ENSP00000349259…	ACTB	ACTG1	AP2A2	APLP2	ARNT2	ATP2A1	ATP2A2	CLASP1	CTNNB1	CXXC4	DNM1L	DPYSL3	EIF4A1	FASN	FUS	HIST1H4A	HSPA5	LGMN	LONP1	METAP2	NCL	NONO	PAPSS1	PSMC6	PSMD2	RAB5A	RAB5B	RAB5C	SFPQ	SMARCD1	SMC1A	SNW1	SPTBN1	STMN2	SYP	TLN1	TUBA1B	VIM
GO.0030182	neuron differentiation	13	0.0145	ENSP00000263710,ENSP00000268603,ENSP00000316029,ENSP00000325875,ENSP00000331514,ENSP00000343690,ENSP00000344456,ENSP00000347532,ENSP00000349259,ENSP00000349960,ENSP00000361824,ENSP00000413234,ENSP00000429243	ACTB	ACTG1	AP2A2	CDH11	CLASP1	CTNNB1	DPYSL3	HSP90AB1	KIAA1598	SPTAN1	SPTBN1	STMN2	TLN1
GO.0006396	RNA processing	11	0.0166	ENSP00000230640,ENSP00000247026,ENSP00000254108,ENSP00000261531,ENSP00000276079,ENSP00000295321,ENSP00000319690,ENSP00000323421,ENSP00000346045,ENSP00000349748,ENSP00000352438	FUS	HNRNPC	IWS1	NONO	NSRP1	PCBP2	RPS17	SFPQ	SKIV2L2	SMC1A	SNW1
GO.0048699	generation of neurons	15	0.0216	ENSP00000224237,ENSP00000261531,ENSP00000262188,ENSP00000263710,ENSP00000268603,ENSP00000316029,ENSP00000325875,ENSP00000331514,ENSP00000343690,ENSP00000344456,ENSP00000349259,ENSP00000349960,ENSP00000361824,ENSP00000413234,ENSP00000429243	ACTB	ACTG1	AP2A2	CDH11	CLASP1	CTNNB1	DPYSL3	HSP90AB1	SMARCD3	SNW1	SPTAN1	SPTBN1	STMN2	TLN1	VIM
GO.0051276	chromosome organization	12	0.0216	ENSP00000262105,ENSP00000262188,ENSP00000319690,ENSP00000323421,ENSP00000336687,ENSP00000344456,ENSP00000349748,ENSP00000349960,ENSP00000352980,ENSP00000378307,ENSP00000378414,ENSP00000392617	ACTB	CBX3	CTNNB1	HIST1H4A	HNRNPC	MCM4	PBRM1	SFPQ	SMARCD1	SMARCD2	SMARCD3	SMC1A
GO.0032502	developmental process	32	0.0234	ENSP00000224237,ENSP00000224784,ENSP00000247026,ENSP00000252245,ENSP00000262188,ENSP00000263233,ENSP00000263574,ENSP00000263710,ENSP00000265174,ENSP00000290378,ENSP00000293831,ENSP00000299218,ENSP00000307479,ENSP00000316029,ENSP00000319690,ENSP00000323421,ENSP00000343690,ENSP00000344456,ENSP00000348316,ENSP00000349259,ENSP00000349960,ENSP00000351108,ENSP00000353826,ENSP00000355645,ENSP00000361824…	ACTA1	ACTA2	ACTB	ACTC1	AP2A2	APLP2	ARNT2	CAND1	CLASP1	CTNNB1	CXXC4	DNM1L	DPYSL3	EIF4A1	HN1	HNRNPAB	HNRNPC	KRT75	LONP1	NACA	NSRP1	PAPSS1	PBRM1	SMARCD1	SMARCD3	SMC1A	SPTAN1	SPTBN1	STMN2	SYP	TLN1	VIM
GO.0008152	metabolic process	51	0.0254	ENSP00000230640,ENSP00000247026,ENSP00000254108,ENSP00000258091,ENSP00000261531,ENSP00000262188,ENSP00000263574,ENSP00000263934,ENSP00000265174,ENSP00000273047,ENSP00000276079,ENSP00000293831,ENSP00000295321,ENSP00000299218,ENSP00000307479,ENSP00000310129,ENSP00000312042,ENSP00000316029,ENSP00000317780,ENSP00000319690,ENSP00000320821,ENSP00000322791,ENSP00000323421,ENSP00000324173,ENSP00000325312…	ACTB	APLP2	ARNT2	ATP2A1	ATP2A2	CAND1	CBX3	CCT7	COL18A1	COX5A	CTNNB1	DNM1L	DPYSL3	EIF3A	EIF4A1	FUS	HDLBP	HIST1H4A	HK1	HNRNPC	HSP90AB1	HSPA5	IWS1	KIF1A	KIF1B	KIF1C	LGMN	LONP1	METAP2	NACA	NONO	NSRP1	PAPSS1	PBRM1	PCBP2	PCBP3	PSMC6	PSMD2	RAB5A	RAB5B	RAB5C	RPS17	SFPQ	SKIV2L2	SMARCD2
GO.0009611	response to wounding	11	0.0254	ENSP00000263168,ENSP00000273047,ENSP00000316029,ENSP00000324173,ENSP00000331514,ENSP00000343690,ENSP00000349595,ENSP00000349960,ENSP00000354947,ENSP00000440045,ENSP00000448035	ACTB	ACTG1	ATP2A1	ATP2A2	CAPZA1	CAPZA2	DPYSL3	HSPA5	NACA	RAB5A	TLN1
GO.0006935	chemotaxis	10	0.0256	ENSP00000263710,ENSP00000316029,ENSP00000325875,ENSP00000331514,ENSP00000343690,ENSP00000347532,ENSP00000349259,ENSP00000349960,ENSP00000361824,ENSP00000413234	ACTB	ACTG1	AP2A2	CLASP1	DPYSL3	HSP90AB1	KIAA1598	SPTAN1	SPTBN1	TLN1
GO.2000144	positive regulation of DNA-templated transcription, initiation	3	0.0266	ENSP00000299218,ENSP00000344456,ENSP00000401802	CAND1	CTNNB1	PSMC6
GO.0006921	cellular component disassembly involved in execution phase of apoptosis	4	0.0267	ENSP00000224237,ENSP00000344456,ENSP00000361824,ENSP00000450399	CTNNB1	DNM1L	SPTAN1	VIM
GO.0006457	protein folding	6	0.0281	ENSP00000258091,ENSP00000301071,ENSP00000324173,ENSP00000325875,ENSP00000336799,ENSP00000349960	ACTB	CCT7	HSP90AB1	HSPA5	TUBA1A	TUBA1B
GO.0034332	adherens junction organization	4	0.0329	ENSP00000268603,ENSP00000331514,ENSP00000344456,ENSP00000349960	ACTB	ACTG1	CDH11	CTNNB1
GO.0051641	cellular localization	19	0.0329	ENSP00000247026,ENSP00000263710,ENSP00000273047,ENSP00000301071,ENSP00000316029,ENSP00000320821,ENSP00000322791,ENSP00000324173,ENSP00000336799,ENSP00000341826,ENSP00000344456,ENSP00000345689,ENSP00000346045,ENSP00000349259,ENSP00000349595,ENSP00000353444,ENSP00000413234,ENSP00000440045,ENSP00000450399	AP2A2	ATP2A1	ATP2A2	CLASP1	CTNNB1	DNM1L	HNRNPA1	HSPA5	KIF1A	KIF1C	NSRP1	RAB5A	RAB5B	RAB5C	RPS17	SPTBN1	TLN1	TUBA1A	TUBA1B
GO.0051649	establishment of localization in cell	17	0.0333	ENSP00000247026,ENSP00000263710,ENSP00000273047,ENSP00000301071,ENSP00000316029,ENSP00000320821,ENSP00000322791,ENSP00000324173,ENSP00000336799,ENSP00000341826,ENSP00000344456,ENSP00000345689,ENSP00000346045,ENSP00000349259,ENSP00000353444,ENSP00000413234,ENSP00000440045	AP2A2	ATP2A2	CLASP1	CTNNB1	HNRNPA1	HSPA5	KIF1A	KIF1C	NSRP1	RAB5A	RAB5B	RAB5C	RPS17	SPTBN1	TLN1	TUBA1A	TUBA1B
GO.0048523	negative regulation of cellular process	28	0.0337	ENSP00000224237,ENSP00000261531,ENSP00000263168,ENSP00000263574,ENSP00000263710,ENSP00000276079,ENSP00000290378,ENSP00000307479,ENSP00000310129,ENSP00000318195,ENSP00000323421,ENSP00000334052,ENSP00000336687,ENSP00000343690,ENSP00000344456,ENSP00000347665,ENSP00000349259,ENSP00000349748,ENSP00000351108,ENSP00000352980,ENSP00000354947,ENSP00000361824,ENSP00000378307,ENSP00000401802,ENSP00000412267…	ACTC1	AP2A2	APLP2	ARNT2	CAPZA1	CAPZA2	CBX3	CLASP1	COL18A1	CTNNB1	CXXC4	DPYSL3	HIST1H4A	HNRNPAB	LGMN	NACA	NCL	NONO	PBRM1	PSMC6	PSMD2	SFPQ	SMC1A	SNW1	SPTAN1	SPTBN1	STMN2	VIM
GO.0007596	blood coagulation	9	0.0339	ENSP00000263168,ENSP00000273047,ENSP00000316029,ENSP00000324173,ENSP00000331514,ENSP00000349595,ENSP00000349960,ENSP00000354947,ENSP00000440045	ACTB	ACTG1	ATP2A1	ATP2A2	CAPZA1	CAPZA2	HSPA5	RAB5A	TLN1
GO.0043044	ATP-dependent chromatin remodeling	4	0.0341	ENSP00000319690,ENSP00000349960,ENSP00000352980,ENSP00000392617	ACTB	HIST1H4A	HNRNPC	SMARCD2
GO.0044767	single-organism developmental process	31	0.0383	ENSP00000224237,ENSP00000224784,ENSP00000252245,ENSP00000262188,ENSP00000263233,ENSP00000263574,ENSP00000263710,ENSP00000265174,ENSP00000290378,ENSP00000293831,ENSP00000299218,ENSP00000307479,ENSP00000316029,ENSP00000319690,ENSP00000323421,ENSP00000343690,ENSP00000344456,ENSP00000349259,ENSP00000349960,ENSP00000351108,ENSP00000353826,ENSP00000355645,ENSP00000361824,ENSP00000378307,ENSP00000378414…	ACTA1	ACTA2	ACTB	ACTC1	AP2A2	APLP2	ARNT2	ATP2A2	CAND1	CLASP1	CTNNB1	CXXC4	DNM1L	DPYSL3	EIF4A1	HNRNPAB	HNRNPC	KRT75	LONP1	NACA	PAPSS1	PBRM1	SMARCD1	SMARCD3	SMC1A	SPTAN1	SPTBN1	STMN2	SYP	TLN1	VIM
GO.0051128	regulation of cellular component organization	19	0.0383	ENSP00000224237,ENSP00000261531,ENSP00000263168,ENSP00000263710,ENSP00000273047,ENSP00000295321,ENSP00000299218,ENSP00000343690,ENSP00000344456,ENSP00000345689,ENSP00000349259,ENSP00000349748,ENSP00000353444,ENSP00000353826,ENSP00000354947,ENSP00000361824,ENSP00000401802,ENSP00000429243,ENSP00000450399	CAND1	CAPZA1	CAPZA2	CLASP1	CTNNB1	DNM1L	DPYSL3	IWS1	LONP1	PSMC6	RAB5A	RAB5B	RAB5C	SFPQ	SNW1	SPTAN1	SPTBN1	STMN2	VIM
GO.0042060	wound healing	10	0.04	ENSP00000263168,ENSP00000273047,ENSP00000316029,ENSP00000324173,ENSP00000331514,ENSP00000349595,ENSP00000349960,ENSP00000354947,ENSP00000440045,ENSP00000448035	ACTB	ACTG1	ATP2A1	ATP2A2	CAPZA1	CAPZA2	HSPA5	NACA	RAB5A	TLN1
GO.0097194	execution phase of apoptosis	4	0.04	ENSP00000224237,ENSP00000344456,ENSP00000361824,ENSP00000450399	CTNNB1	DNM1L	SPTAN1	VIM
GO.0007399	nervous system development	18	0.0417	ENSP00000224237,ENSP00000261531,ENSP00000262188,ENSP00000263574,ENSP00000263710,ENSP00000268603,ENSP00000307479,ENSP00000316029,ENSP00000325875,ENSP00000331514,ENSP00000343690,ENSP00000344456,ENSP00000349259,ENSP00000349960,ENSP00000361824,ENSP00000378414,ENSP00000413234,ENSP00000429243	ACTB	ACTG1	AP2A2	APLP2	ARNT2	CDH11	CLASP1	CTNNB1	DPYSL3	HSP90AB1	SMARCD1	SMARCD3	SNW1	SPTAN1	SPTBN1	STMN2	TLN1	VIM
GO.0043066	negative regulation of apoptotic process	11	0.0448	ENSP00000276079,ENSP00000290378,ENSP00000307479,ENSP00000310129,ENSP00000318195,ENSP00000324173,ENSP00000325875,ENSP00000334052,ENSP00000344456,ENSP00000401802,ENSP00000448035	ACTC1	ARNT2	CTNNB1	HSP90AB1	HSPA5	LGMN	NACA	NCL	NONO	PSMC6	PSMD2
GO.0072132	mesenchyme morphogenesis	3	0.0463	ENSP00000224784,ENSP00000290378,ENSP00000355645	ACTA1	ACTA2	ACTC1
GO.0048096	chromatin-mediated maintenance of transcription	2	0.0479	ENSP00000344456,ENSP00000378414	CTNNB1	SMARCD1
GO.0090066	regulation of anatomical structure size	7	0.0489	ENSP00000224784,ENSP00000263168,ENSP00000273047,ENSP00000325875,ENSP00000349259,ENSP00000354947,ENSP00000361824	ACTA2	CAPZA1	CAPZA2	HSP90AB1	RAB5A	SPTAN1	SPTBN1
[truncated: 6 more columns]

## Sheet: STRING_enriched BP_Mus
#pathway ID	pathway description	observed gene count	false discovery rate	matching proteins in your network (IDs)	matching proteins in your network (labels)
GO.0016043	cellular component organization	35	0.000103	ENSMUSP00000000727,ENSMUSP00000006629,ENSMUSP00000007130,ENSMUSP00000015877,ENSMUSP00000017975,ENSMUSP00000020315,ENSMUSP00000021052,ENSMUSP00000023759,ENSMUSP00000025379,ENSMUSP00000025955,ENSMUSP00000028062,ENSMUSP00000029002,ENSMUSP00000029034,ENSMUSP00000030623,ENSMUSP00000030791,ENSMUSP00000031423,ENSMUSP00000032974,ENSMUSP00000034453,ENSMUSP00000041378,ENSMUSP00000041814,ENSMUSP00000042266,…	Acta1	Actb	Actg1	Aplp2	Atp2a1	Atp2a2	Cand1	Capza1	Capza2	Cdh11	Clasp1	Col18a1	Ctnnb1	Dnm1l	Dpysl3	Eif3a	Hnrnpab	Hnrnpc	Kiaa1598	Lonp1	Pbrm1	Pmp2	Rab5a	Rab5b	Rab5c	Rps17	Sfpq	Smarcd1	Smarcd2	Smarcd3	Spna2	Spnb2	Stmn2	Tuba1a	Vim
GO.0071840	cellular component organization or biogenesis	36	0.000103	ENSMUSP00000000727,ENSMUSP00000006629,ENSMUSP00000007130,ENSMUSP00000015877,ENSMUSP00000017975,ENSMUSP00000020315,ENSMUSP00000021052,ENSMUSP00000022281,ENSMUSP00000023759,ENSMUSP00000025379,ENSMUSP00000025955,ENSMUSP00000028062,ENSMUSP00000029002,ENSMUSP00000029034,ENSMUSP00000030623,ENSMUSP00000030791,ENSMUSP00000031423,ENSMUSP00000032974,ENSMUSP00000034453,ENSMUSP00000041378,ENSMUSP00000041814,…	Acta1	Actb	Actg1	Aplp2	Atp2a1	Atp2a2	Cand1	Capza1	Capza2	Cdh11	Clasp1	Col18a1	Ctnnb1	Dnm1l	Dpysl3	Eif3a	Hnrnpab	Hnrnpc	Kiaa1598	Lonp1	Pbrm1	Pmp2	Rab5a	Rab5b	Rab5c	Rps17	Sfpq	Skiv2l2	Smarcd1	Smarcd2	Smarcd3	Spna2	Spnb2	Stmn2	Tuba1a	Vim
GO.1901880	negative regulation of protein depolymerization	6	0.000255	ENSMUSP00000006629,ENSMUSP00000015877,ENSMUSP00000029002,ENSMUSP00000042266,ENSMUSP00000102381,ENSMUSP00000109348	Capza1	Capza2	Clasp1	Spna2	Spnb2	Stmn2
GO.0043933	macromolecular complex subunit organization	20	0.000889	ENSMUSP00000007130,ENSMUSP00000020315,ENSMUSP00000021052,ENSMUSP00000023759,ENSMUSP00000025379,ENSMUSP00000025955,ENSMUSP00000028062,ENSMUSP00000029002,ENSMUSP00000030623,ENSMUSP00000030791,ENSMUSP00000034453,ENSMUSP00000041814,ENSMUSP00000042266,ENSMUSP00000076777,ENSMUSP00000079628,ENSMUSP00000093945,ENSMUSP00000094778,ENSMUSP00000098066,ENSMUSP00000107237,ENSMUSP00000107727	Acta1	Actb	Cand1	Clasp1	Ctnnb1	Dnm1l	Dpysl3	Eif3a	Hnrnpc	Lonp1	Pbrm1	Rps17	Sfpq	Smarcd1	Smarcd2	Smarcd3	Stmn2	Tuba1a	Tuba1b	Vim
GO.0090131	mesenchyme migration	3	0.000889	ENSMUSP00000034453,ENSMUSP00000048218,ENSMUSP00000087736	Acta1	Acta2	Actc1
GO.0032272	negative regulation of protein polymerization	5	0.00164	ENSMUSP00000006629,ENSMUSP00000015877,ENSMUSP00000029002,ENSMUSP00000102381,ENSMUSP00000109348	Capza1	Capza2	Spna2	Spnb2	Stmn2
GO.0006338	chromatin remodeling	6	0.00311	ENSMUSP00000007130,ENSMUSP00000021052,ENSMUSP00000023759,ENSMUSP00000030791,ENSMUSP00000098066,ENSMUSP00000107237	Actb	Ctnnb1	Hnrnpc	Smarcd1	Smarcd2	Smarcd3
GO.0009987	cellular process	58	0.00311	ENSMUSP00000000090,ENSMUSP00000000727,ENSMUSP00000006629,ENSMUSP00000007130,ENSMUSP00000015877,ENSMUSP00000017975,ENSMUSP00000020315,ENSMUSP00000021052,ENSMUSP00000021428,ENSMUSP00000021607,ENSMUSP00000022281,ENSMUSP00000022380,ENSMUSP00000025243,ENSMUSP00000025955,ENSMUSP00000027438,ENSMUSP00000028062,ENSMUSP00000028102,ENSMUSP00000028222,ENSMUSP00000029002,ENSMUSP00000029034,ENSMUSP00000029666,…	Acta2	Actb	Actg1	Aplp2	Arnt2	Atp2a1	Cand1	Capza1	Capza2	Ccdc55	Cdh11	Clasp1	Col18a1	Cox5a	Ctnnb1	Cxxc4	Dnm1l	Eif3a	Eif4a1	Fus	Hk1	Hnrnpa1	Hnrnpab	Hnrnpc	Hspa5	Iws1	Kiaa1598	Kif1a	Kif1b	Kif1c	Kif5c	Krt75	Lgmn	Lonp1	Metap2	Naca	Ncl	Nono	Papss1	Pbrm1	Pcbp2	Pmp2	Psmc6	Rab5a	Rab5b
GO.0051494	negative regulation of cytoskeleton organization	6	0.00311	ENSMUSP00000006629,ENSMUSP00000015877,ENSMUSP00000029002,ENSMUSP00000042266,ENSMUSP00000102381,ENSMUSP00000109348	Capza1	Capza2	Clasp1	Spna2	Spnb2	Stmn2
GO.0051693	actin filament capping	4	0.00311	ENSMUSP00000006629,ENSMUSP00000015877,ENSMUSP00000102381,ENSMUSP00000109348	Capza1	Capza2	Spna2	Spnb2
GO.0071353	cellular response to interleukin-4	4	0.00311	ENSMUSP00000024739,ENSMUSP00000028222,ENSMUSP00000052872,ENSMUSP00000076777	Fasn	Hsp90ab1	Hspa5	Tuba1b
GO.0008380	RNA splicing	8	0.0048	ENSMUSP00000021428,ENSMUSP00000022281,ENSMUSP00000025243,ENSMUSP00000030623,ENSMUSP00000033673,ENSMUSP00000042658,ENSMUSP00000099552,ENSMUSP00000107237	Ccdc55	Hnrnpa1	Hnrnpc	Iws1	Nono	Sfpq	Skiv2l2	Snw1
GO.0008152	metabolic process	47	0.00523	ENSMUSP00000000090,ENSMUSP00000000727,ENSMUSP00000006629,ENSMUSP00000007130,ENSMUSP00000017975,ENSMUSP00000020315,ENSMUSP00000021052,ENSMUSP00000021428,ENSMUSP00000021607,ENSMUSP00000022281,ENSMUSP00000022380,ENSMUSP00000024739,ENSMUSP00000025243,ENSMUSP00000025379,ENSMUSP00000025955,ENSMUSP00000028102,ENSMUSP00000028222,ENSMUSP00000029666,ENSMUSP00000030623,ENSMUSP00000030791,ENSMUSP00000032078,…	Aplp2	Arnt2	Atp2a1	Cand1	Ccdc55	Cct7	Cox5a	Ctnnb1	Dnm1l	Dpysl3	Eif3a	Eif4a1	Fasn	Hdlbp	Hk1	Hnrnpa1	Hnrnpab	Hnrnpc	Hsp90ab1	Hspa5	Iws1	Kif1a	Kif1b	Kif1c	Kif5c	Lgmn	Lonp1	Metap2	Naca	Nono	Papss1	Pbrm1	Pcbp2	Psmc6	Rab5a	Rab5b	Rab5c	Rps17	Sfpq	Skiv2l2	Smarcd2	Smarcd3	Smc1a	Snw1	Spnb2
GO.0043254	regulation of protein complex assembly	8	0.00546	ENSMUSP00000006629,ENSMUSP00000015877,ENSMUSP00000020315,ENSMUSP00000022380,ENSMUSP00000029002,ENSMUSP00000093945,ENSMUSP00000102381,ENSMUSP00000109348	Cand1	Capza1	Capza2	Dnm1l	Psmc6	Spna2	Spnb2	Stmn2
GO.0072132	mesenchyme morphogenesis	4	0.00546	ENSMUSP00000007130,ENSMUSP00000034453,ENSMUSP00000048218,ENSMUSP00000087736	Acta1	Acta2	Actc1	Ctnnb1
GO.0032502	developmental process	33	0.00597	ENSMUSP00000007130,ENSMUSP00000020315,ENSMUSP00000021083,ENSMUSP00000021428,ENSMUSP00000023759,ENSMUSP00000024739,ENSMUSP00000028062,ENSMUSP00000028222,ENSMUSP00000029002,ENSMUSP00000030791,ENSMUSP00000031423,ENSMUSP00000034453,ENSMUSP00000036246,ENSMUSP00000041378,ENSMUSP00000041814,ENSMUSP00000044645,ENSMUSP00000048218,ENSMUSP00000052872,ENSMUSP00000061472,ENSMUSP00000071486,ENSMUSP00000072428,…	Acta1	Acta2	Actb	Actc1	Actg1	Aplp2	Arnt2	Atp2a2	Cand1	Ccdc55	Cdh11	Col18a1	Ctnnb1	Dnm1l	Eif4a1	Fasn	Hn1	Hnrnpab	Hnrnpc	Hsp90ab1	Hspa5	Kiaa1598	Kif1b	Krt75	Lonp1	Naca	Pbrm1	Smarcd1	Smarcd3	Smc1a	Snw1	Stmn2	Vim
GO.0006337	nucleosome disassembly	3	0.00721	ENSMUSP00000021052,ENSMUSP00000023759,ENSMUSP00000030791	Smarcd1	Smarcd2	Smarcd3
GO.0031498	chromatin disassembly	3	0.00721	ENSMUSP00000021052,ENSMUSP00000023759,ENSMUSP00000030791	Smarcd1	Smarcd2	Smarcd3
GO.0032470	positive regulation of endoplasmic reticulum calcium ion concentration	2	0.00721	ENSMUSP00000031423,ENSMUSP00000032974	Atp2a1	Atp2a2
GO.0006996	organelle organization	22	0.00847	ENSMUSP00000000727,ENSMUSP00000007130,ENSMUSP00000021052,ENSMUSP00000023759,ENSMUSP00000025379,ENSMUSP00000028062,ENSMUSP00000029002,ENSMUSP00000030623,ENSMUSP00000030791,ENSMUSP00000031423,ENSMUSP00000032974,ENSMUSP00000034453,ENSMUSP00000041814,ENSMUSP00000042266,ENSMUSP00000071486,ENSMUSP00000076777,ENSMUSP00000079628,ENSMUSP00000093945,ENSMUSP00000098066,ENSMUSP00000102987,ENSMUSP00000107237,…	Acta1	Actb	Actg1	Atp2a1	Atp2a2	Clasp1	Ctnnb1	Dnm1l	Dpysl3	Hnrnpc	Lonp1	Pbrm1	Rab5b	Rab5c	Rps17	Sfpq	Smarcd1	Smarcd2	Smarcd3	Stmn2	Tuba1b	Vim
GO.0044699	single-organism process	52	0.0112	ENSMUSP00000000090,ENSMUSP00000000727,ENSMUSP00000006629,ENSMUSP00000007130,ENSMUSP00000015877,ENSMUSP00000017975,ENSMUSP00000020315,ENSMUSP00000021052,ENSMUSP00000021428,ENSMUSP00000021607,ENSMUSP00000022380,ENSMUSP00000023353,ENSMUSP00000023759,ENSMUSP00000028062,ENSMUSP00000028102,ENSMUSP00000028222,ENSMUSP00000029002,ENSMUSP00000029666,ENSMUSP00000030623,ENSMUSP00000030791,ENSMUSP00000032078,…	Acta1	Acta2	Actc1	Aplp2	Atp2a1	Cand1	Capza1	Capza2	Cct7	Cdh11	Clasp1	Col18a1	Cox5a	Ctnnb1	Cxxc4	Dnm1l	Eif4a1	Fasn	Hdlbp	Hk1	Hnrnpab	Hnrnpc	Hspa5	Kiaa1598	Kif1a	Kif1b	Kif1c	Kif5c	Krt75	Lgmn	Lonp1	Mcm4	Naca	Nono	Papss1	Pbrm1	Psmc6	Rab5a	Rab5b	Rab5c	Sfpq	Smarcd1	Smarcd2	Smarcd3	Snw1
GO.0006397	mRNA processing	8	0.013	ENSMUSP00000021428,ENSMUSP00000022281,ENSMUSP00000025243,ENSMUSP00000030623,ENSMUSP00000033673,ENSMUSP00000042658,ENSMUSP00000099552,ENSMUSP00000107237	Ccdc55	Hnrnpa1	Hnrnpc	Iws1	Nono	Sfpq	Skiv2l2	Snw1
GO.0043241	protein complex disassembly	4	0.0181	ENSMUSP00000021052,ENSMUSP00000023759,ENSMUSP00000029002,ENSMUSP00000030791	Smarcd1	Smarcd2	Smarcd3	Stmn2
GO.0044087	regulation of cellular component biogenesis	10	0.0215	ENSMUSP00000006629,ENSMUSP00000015877,ENSMUSP00000017975,ENSMUSP00000020315,ENSMUSP00000025379,ENSMUSP00000027438,ENSMUSP00000029002,ENSMUSP00000093945,ENSMUSP00000102381,ENSMUSP00000109348	Cand1	Capza1	Capza2	Dnm1l	Dpysl3	Ncl	Rab5a	Spna2	Spnb2	Stmn2
GO.0071822	protein complex subunit organization	13	0.0224	ENSMUSP00000020315,ENSMUSP00000021052,ENSMUSP00000023759,ENSMUSP00000025379,ENSMUSP00000028062,ENSMUSP00000029002,ENSMUSP00000030791,ENSMUSP00000034453,ENSMUSP00000041814,ENSMUSP00000042266,ENSMUSP00000076777,ENSMUSP00000093945,ENSMUSP00000094778	Acta1	Cand1	Clasp1	Dnm1l	Dpysl3	Lonp1	Smarcd1	Smarcd2	Smarcd3	Stmn2	Tuba1a	Tuba1b	Vim
GO.0016192	vesicle-mediated transport	12	0.0229	ENSMUSP00000000727,ENSMUSP00000003038,ENSMUSP00000006629,ENSMUSP00000007130,ENSMUSP00000017975,ENSMUSP00000027438,ENSMUSP00000061472,ENSMUSP00000069429,ENSMUSP00000092075,ENSMUSP00000093945,ENSMUSP00000102987,ENSMUSP00000128432	Ap2a2	Ctnnb1	Dnm1l	Kif1a	Kif1b	Kif1c	Ncl	Rab5a	Rab5b	Rab5c	Spnb2	Syp
GO.0044763	single-organism cellular process	48	0.0229	ENSMUSP00000000090,ENSMUSP00000000727,ENSMUSP00000006629,ENSMUSP00000007130,ENSMUSP00000015877,ENSMUSP00000017975,ENSMUSP00000020315,ENSMUSP00000021052,ENSMUSP00000021428,ENSMUSP00000022380,ENSMUSP00000023353,ENSMUSP00000023759,ENSMUSP00000028062,ENSMUSP00000028102,ENSMUSP00000028222,ENSMUSP00000029002,ENSMUSP00000029666,ENSMUSP00000030623,ENSMUSP00000030791,ENSMUSP00000032078,ENSMUSP00000032974,…	Acta2	Actb	Actg1	Aplp2	Atp2a1	Cand1	Capza1	Capza2	Cct7	Cdh11	Clasp1	Col18a1	Cox5a	Ctnnb1	Cxxc4	Dnm1l	Fasn	Hk1	Hnrnpab	Hnrnpc	Hspa5	Kiaa1598	Kif1a	Kif1b	Kif1c	Kif5c	Krt75	Mcm4	Naca	Nono	Papss1	Pbrm1	Psmc6	Rab5a	Rab5b	Rab5c	Sfpq	Smarcd1	Smarcd2	Smarcd3	Snw1	Spna2	Spnb2	Stmn2	Syp
GO.0044767	single-organism developmental process	31	0.024	ENSMUSP00000007130,ENSMUSP00000020315,ENSMUSP00000021428,ENSMUSP00000023759,ENSMUSP00000024739,ENSMUSP00000028062,ENSMUSP00000028222,ENSMUSP00000029002,ENSMUSP00000030791,ENSMUSP00000031423,ENSMUSP00000034453,ENSMUSP00000036246,ENSMUSP00000041378,ENSMUSP00000041814,ENSMUSP00000044645,ENSMUSP00000048218,ENSMUSP00000052872,ENSMUSP00000061472,ENSMUSP00000071486,ENSMUSP00000072428,ENSMUSP00000074681,…	Acta1	Acta2	Actb	Actc1	Actg1	Aplp2	Arnt2	Atp2a2	Cand1	Cdh11	Col18a1	Ctnnb1	Dnm1l	Eif4a1	Fasn	Hnrnpab	Hnrnpc	Hsp90ab1	Hspa5	Kiaa1598	Kif1b	Krt75	Lonp1	Naca	Pbrm1	Smarcd1	Smarcd3	Smc1a	Snw1	Stmn2	Vim
GO.0065007	biological regulation	46	0.0365	ENSMUSP00000000727,ENSMUSP00000003038,ENSMUSP00000006629,ENSMUSP00000007130,ENSMUSP00000007212,ENSMUSP00000015877,ENSMUSP00000017975,ENSMUSP00000021052,ENSMUSP00000021428,ENSMUSP00000021607,ENSMUSP00000023759,ENSMUSP00000025243,ENSMUSP00000025379,ENSMUSP00000025955,ENSMUSP00000028062,ENSMUSP00000028222,ENSMUSP00000029002,ENSMUSP00000030623,ENSMUSP00000032974,ENSMUSP00000033673,ENSMUSP00000034453,…	Acta1	Acta2	Actc1	Ap2a2	Aplp2	Atp2a1	Capza1	Capza2	Cbx1	Ccdc55	Clasp1	Col18a1	Ctnnb1	Cxxc4	Dnm1l	Dpysl3	Eif3a	Eif4a1	Fus	Hk1	Hnrnpab	Hnrnpc	Hspa5	Iws1	Kiaa1598	Lgmn	Lonp1	Naca	Nono	Pbrm1	Pcbp2	Psmd2	Rab5a	Rab5b	Rab5c	Rps17	Sfpq	Smarcd1	Smarcd2	Smc1a	Snw1	Spna2	Spnb2	Stmn2	Syp
GO.0051128	regulation of cellular component organization	18	0.0403	ENSMUSP00000000727,ENSMUSP00000006629,ENSMUSP00000007130,ENSMUSP00000015877,ENSMUSP00000017975,ENSMUSP00000020315,ENSMUSP00000021428,ENSMUSP00000025243,ENSMUSP00000025379,ENSMUSP00000028062,ENSMUSP00000029002,ENSMUSP00000030623,ENSMUSP00000041814,ENSMUSP00000042266,ENSMUSP00000093945,ENSMUSP00000102381,ENSMUSP00000102987,ENSMUSP00000109348	Cand1	Capza1	Capza2	Clasp1	Ctnnb1	Dnm1l	Dpysl3	Iws1	Lonp1	Rab5a	Rab5b	Rab5c	Sfpq	Snw1	Spna2	Spnb2	Stmn2	Vim
GO.0051258	protein polymerization	4	0.0403	ENSMUSP00000042266,ENSMUSP00000076777,ENSMUSP00000093945,ENSMUSP00000094778	Clasp1	Dnm1l	Tuba1a	Tuba1b
GO.0048519	negative regulation of biological process	27	0.0483	ENSMUSP00000006629,ENSMUSP00000007130,ENSMUSP00000015877,ENSMUSP00000020315,ENSMUSP00000021428,ENSMUSP00000021607,ENSMUSP00000024739,ENSMUSP00000025379,ENSMUSP00000027438,ENSMUSP00000028062,ENSMUSP00000028222,ENSMUSP00000029002,ENSMUSP00000030623,ENSMUSP00000031423,ENSMUSP00000032974,ENSMUSP00000033673,ENSMUSP00000042266,ENSMUSP00000044645,ENSMUSP00000076294,ENSMUSP00000082154,ENSMUSP00000089680,…	Arnt2	Atp2a1	Atp2a2	Cand1	Capza1	Capza2	Cbx1	Clasp1	Ctnnb1	Cxxc4	Dpysl3	Hnrnpab	Hsp90ab1	Hspa5	Lgmn	Naca	Ncl	Nono	Pbrm1	Pcbp2	Sfpq	Smc1a	Snw1	Spna2	Spnb2	Stmn2	Vim
GO.0048856	anatomical structure development	28	0.0483	ENSMUSP00000007130,ENSMUSP00000021428,ENSMUSP00000023759,ENSMUSP00000024739,ENSMUSP00000028062,ENSMUSP00000028222,ENSMUSP00000029002,ENSMUSP00000030791,ENSMUSP00000031423,ENSMUSP00000034453,ENSMUSP00000036246,ENSMUSP00000041378,ENSMUSP00000044645,ENSMUSP00000048218,ENSMUSP00000052872,ENSMUSP00000061472,ENSMUSP00000071486,ENSMUSP00000072428,ENSMUSP00000074681,ENSMUSP00000082154,ENSMUSP00000087736,…	Acta1	Acta2	Actb	Actc1	Actg1	Aplp2	Arnt2	Atp2a2	Cdh11	Col18a1	Ctnnb1	Dnm1l	Eif4a1	Fasn	Hnrnpab	Hsp90ab1	Hspa5	Kiaa1598	Kif1b	Krt75	Naca	Pbrm1	Smarcd1	Smarcd3	Smc1a	Snw1	Stmn2	Vim
GO.0033043	regulation of organelle organization	12	0.049	ENSMUSP00000006629,ENSMUSP00000007130,ENSMUSP00000015877,ENSMUSP00000021428,ENSMUSP00000025243,ENSMUSP00000029002,ENSMUSP00000030623,ENSMUSP00000041814,ENSMUSP00000042266,ENSMUSP00000093945,ENSMUSP00000102381,ENSMUSP00000109348	Capza1	Capza2	Clasp1	Ctnnb1	Dnm1l	Iws1	Lonp1	Sfpq	Snw1	Spna2	Spnb2	Stmn2
GO.0051641	cellular localization	16	0.049	ENSMUSP00000000727,ENSMUSP00000003038,ENSMUSP00000006629,ENSMUSP00000007130,ENSMUSP00000017975,ENSMUSP00000028222,ENSMUSP00000030187,ENSMUSP00000032974,ENSMUSP00000042266,ENSMUSP00000042658,ENSMUSP00000061472,ENSMUSP00000092075,ENSMUSP00000093945,ENSMUSP00000099552,ENSMUSP00000102987,ENSMUSP00000128432	Ap2a2	Atp2a1	Ccdc55	Clasp1	Ctnnb1	Dnm1l	Hnrnpa1	Hspa5	Kif1a	Kif1b	Kif1c	Rab5a	Rab5b	Rab5c	Spnb2	Tln1
GO.0051234	establishment of localization	23	0.0494	ENSMUSP00000000090,ENSMUSP00000000727,ENSMUSP00000006629,ENSMUSP00000007130,ENSMUSP00000017975,ENSMUSP00000025243,ENSMUSP00000027438,ENSMUSP00000028102,ENSMUSP00000028222,ENSMUSP00000029034,ENSMUSP00000032078,ENSMUSP00000032974,ENSMUSP00000042266,ENSMUSP00000042658,ENSMUSP00000043047,ENSMUSP00000061472,ENSMUSP00000089680,ENSMUSP00000092075,ENSMUSP00000093945,ENSMUSP00000099552,ENSMUSP00000102987,…	Atp2a1	Ccdc55	Cct7	Clasp1	Cox5a	Ctnnb1	Dnm1l	Hdlbp	Hnrnpa1	Hspa5	Iws1	Kif1a	Kif1b	Kif1c	Kif5c	Naca	Ncl	Pmp2	Rab5a	Rab5b	Rab5c	Spnb2	Ttpal
[truncated: 13 more columns]
