# Supplementary material for: Role of the visual experience-dependent nascent proteome in neuronal plasticity
Source: eLife. 2018 Feb 7;7:e33420. doi: 10.7554/eLife.33420 (PMC5815848; doi:10.7554/eLife.33420)
Supplement: Supplementary file 8. — List of 992 proteins from the Shen et al. (2014) study of AHA-labeled NSPs from tadpole brains labeled over a 24 hr period, generated by searching against the Uniprot database. We compared the 5 hr optic tectal nascent proteome (Supplementary file 1), searched against the Uniprot database, with the 24 hr whole brain nascent proteome, and highlighted the overlapping proteins. The dataset for the 24 hr whole brain nascent proteome is available at http://proteomecentral.proteomexchange.org/cgi/GetDataset?ID=PXD008659. [file elife-33420-supp8.xlsx]

## Sheet: 24h_Nascent Proteome
Comparison of the 5h nascent proteome from optic tectum with the 24h nascent proteome from the whole brain, Dataset from Shen et al 2014.
Note: Yellow highlighted 104 proteins overlap with the tectal nascent proteome reported in this paper
UniprotKB	Gene Symbol	Protein name	Organism
A1A638	dbi	Dbib protein	Xenopus laevis
A1L1G8	brd3	LOC100036838 protein	Xenopus laevis
A2RV69	nup107	LOC100037138 protein	Xenopus laevis
A2RV70	znf326	DBIRD complex subunit ZNF326 (Zinc finger protein 326) (Zinc finger protein interacting with mRNPs)	Xenopus laevis
A2VD00	eif3a	Eukaryotic translation initiation factor 3 subunit A (eIF3a) (Eukaryotic translation initiation factor 3 subunit 10) (eIF-3-theta)	Xenopus laevis
A4IFX5	LOC100049142	LOC100049142 protein (Fragment)	Xenopus laevis
A4IIQ7	arnt2	Arnt2 protein	Xenopus laevis
B1H1N8	vat1	LOC100036826 protein	Xenopus laevis
B1H1P4	LOC431876	LOC431876 protein (Fragment)	Xenopus laevis
B1WBA6	eif4g1	LOC733162 protein	Xenopus tropicalis
B1WBB7	khsrp	LOC100158419 protein	Xenopus laevis
B1WBD3	aars	LOC100158432 protein	Xenopus laevis
B3DLT3	pfn2	Profilin	Xenopus laevis
O12983	dsRAD-2	DsRNA adenosine deaminase (Fragment)	Xenopus laevis
O13022	dpysl3-a	Dihydropyrimidinase-related protein 3-A (DRP-3-A) (Neural-specific protein 1)	Xenopus laevis
O93235	cirbp-a	Cold-inducible RNA-binding protein A (Cold-inducible RNA-binding protein) (XCIRP) (Cold-inducible RNA-binding protein 1) (XCIRP-1) (Glycine-rich RNA-binding protein CIRP-A)	Xenopus laevis
O93250	cntn1	Contactin A	Xenopus tropicalis
O93264	cdh11	Cadherin	Xenopus laevis
O93501	chtop	NO27 protein	Xenopus laevis
O93522	myh9	Nonmuscle myosin II heavy chain A	Xenopus laevis
P16878		Keratin, type II cytoskeletal (XENCK55(5/6))	Xenopus laevis
P19600	hnrnpc	Heterogeneous nuclear ribonucleoprotein C (hnRNP C) (hnRNP core protein C)	Xenopus laevis
P24790	vim4	Vimentin-4	Xenopus laevis
P25980	ubtf-b	Nucleolar transcription factor 1-B (Upstream-binding factor 1-B) (UBF-1-B) (xUBF-2)	Xenopus laevis
P50143	cct3	T-complex protein 1 subunit gamma (TCP-1-gamma) (CCT-gamma)	Xenopus laevis
P50532	smc4	Structural maintenance of chromosomes protein 4 (SMC protein 4) (SMC-4) (Chromosome assembly protein XCAP-C) (Chromosome-associated protein C)	Xenopus laevis
P70039	apc	Adenomatous polyposis coli homolog (Protein APC)	Xenopus laevis
P79933	ina	Xefiltin	Xenopus laevis
Q04834	myh10	Nonmuscle myosin heavy chain b	Xenopus laevis
Q06459	ncl	Nucleolin	Xenopus laevis
Q07GA5	capza2	Capping protein (Actin filament) muscle Z-line, alpha 2	Xenopus laevis
Q08BU0	rapgef2	LOC100145659 protein	Xenopus laevis
Q09001	stmn2-a	Stathmin-2-A (SCG10 protein homolog A)	Xenopus laevis
Q0P032	serpine2	Protease nexin-1	Xenopus laevis
Q0V9W5	scg2	Secretogranin II	Xenopus laevis
Q1XG42	nipbl	Nipped-B protein	Xenopus laevis
Q28FK8	capns2	Calpain, small subunit 1 (Calpain, small subunit 2)	Xenopus laevis
Q28GS7	ckb	Creatine kinase, brain	Xenopus laevis
Q32N72	ubap2	MGC132149 protein	Xenopus laevis
Q32NK0	myef2	MGC131089 protein	Xenopus laevis
Q4KLT4	LOC733296	LOC733296 protein (Fragment)	Xenopus laevis
Q4U0G1	clasp1-a	CLIP-associating protein 1-A (Cytoplasmic linker-associated protein 1-A) (XCLASP1)	Xenopus laevis
Q4V7Q3	sh3gl2	MGC115476 protein	Danio rerio
Q566H1	crmp1	MGC115310 protein	Xenopus laevis
Q5FWN8	dnajb6-a	DnaJ homolog subfamily B member 6-A	Xenopus laevis
Q5U231	zfr	Zinc finger RNA-binding protein	Xenopus laevis
Q5U4S4	sncb	Beta-synuclein	Xenopus laevis
Q5U4U8	LOC495429	LOC495429 protein (Fragment)	Xenopus laevis
Q5U5A3	igsf3	Immunoglobulin superfamily member 3 (IgSF3)	Xenopus laevis
Q5U5C7	pdcd5	LOC495300 protein	Xenopus laevis
Q640A2	hnrnpdl	Heterogeneous nuclear ribonucleoprotein D-like (hnRNP D-like) (hnRNP DL)	Xenopus laevis
Q640G3	LOC494679	LOC494679 protein (Fragment)	Xenopus laevis
Q642R6	nup205	MGC83295 protein	Xenopus tropicalis
Q66IX2	psmd13	MGC84231 protein	Xenopus laevis
Q66IX6	vta1	MGC84207 protein	Xenopus laevis
Q66J07	nnt	MGC83563 protein	Xenopus laevis
Q68FB7	srsf7	Splicing factor, arginine/serine-rich 7, 35kDa	Xenopus laevis
Q68FJ8	tom1l2	TOM1-like protein 2 (Target of Myb-like protein 2)	Xenopus tropicalis
Q6AZI2	ccdc47	Coiled-coil domain-containing protein 47	Xenopus tropicalis
Q6AZJ3	napb	Napb protein	Xenopus tropicalis
Q6DD04	ilf3-b	Interleukin enhancer-binding factor 3-B (Double-stranded RNA-binding protein 4F.2) (DsRNA-binding protein 4F.2)	Xenopus tropicalis
Q6DD48	pgk1	Phosphoglycerate kinase (EC 2.7.2.3)	Xenopus tropicalis
Q6DDW4	cpsf6	Cleavage and polyadenylation specificity factor subunit 6	Xenopus tropicalis
Q6DE62	hspa4	LOC398863 protein	Xenopus tropicalis
Q6DJH8	actr1a	Actr1a-prov protein	Xenopus tropicalis
Q6GLM8	spock2	MGC84683 protein	Xenopus laevis
Q6GLY6	prnp	MGC84114 protein	Xenopus tropicalis
Q6GP61	l1cam	L1cam-a protein	Xenopus tropicalis
Q6GQ73	hook3	Protein Hook homolog 3	Xenopus tropicalis
Q6GR28	aldh3a2	Aldehyde dehydrogenase	Xenopus laevis
Q6IMN2		Cytoplasmic activation/proliferation-associated protein 1	Xenopus laevis
Q6INT0	top2a	DNA topoisomerase 2 (EC 5.99.1.3)	Xenopus laevis
Q6IR52	pbx2	Pre-B-cell leukemia transcription factor 2 (Homeobox protein pbx2)	Xenopus laevis
Q6IRP7	atp5h	ATP synthase subunit d, mitochondrial	Xenopus laevis
Q6JV11	cap2	Adenylyl cyclase-associated protein	Xenopus laevis
Q6NTS2	banf1-a	Barrier-to-autointegration factor A	Xenopus laevis
Q6P285	uba1	Uba1b protein	Xenopus laevis
Q6P302	stip1	Stress-induced phosphoprotein 1 (Stress-induced-phosphoprotein 1 (Hsp70/Hsp90-organizing protein))	Cynops pyrrhogaster
Q6P363	hnrnpk	Heterogeneous nuclear ribonucleoprotein K	Xenopus laevis
Q6P4W2	ddx5	DEAD (Asp-Glu-Ala-Asp) box polypeptide 5 (DEAD-box helicase 5)	Xenopus laevis
Q6PAE3	hsp90b1	MGC68448 protein	Xenopus laevis
Q6PCJ1	dctn1	Dynactin subunit 1	Xenopus laevis
Q7SY65	krt18-b	Keratin, type I cytoskeletal 18-B (Cytokeratin-18-B) (CK-18-B) (Keratin-18-B) (K18-B)	Mus musculus
Q7T0M4		MGC69154 protein	Xenopus laevis
Q7ZWT8	PIP5K2B	PIP5K2B protein (Fragment)	Xenopus laevis
Q7ZWU3	pdia3	Protein disulfide-isomerase (EC 5.3.4.1)	Xenopus laevis
Q7ZX13	dtna	Dystrobrevin	Xenopus tropicalis
Q7ZX15	akt2-a	RAC-beta serine/threonine-protein kinase A (EC 2.7.11.1) (Protein kinase Akt-2-A) (Protein kinase B, beta-A) (PKB beta-A) (RAC-PK-beta-A)	Xenopus laevis
Q7ZX33	hnrnpa1	Hnrpa1 protein	Xenopus laevis
Q7ZY22	smarcc1	Smarcc1 protein	Xenopus laevis
Q7ZY44	ilf2	Ilf2-prov protein	Xenopus tropicalis
Q7ZYE9	hnrnpab	Hnrpab-prov protein	Xenopus laevis
Q7ZYF2	tpt1	Translationally-controlled tumor protein homolog (TCTP)	Xenopus laevis
Q7ZYI6	flot2	Flot2 protein	Xenopus tropicalis
Q7ZYQ1	slc3a2	MGC53951 protein	Xenopus tropicalis
Q8AVC2	gldc	Glycine cleavage system P protein (EC 1.4.4.2)	Xenopus laevis
Q8AVE2	hspa1l	Hsc70 protein	Xenopus laevis
Q8AVM2	eif5	Eif5-prov protein	Xenopus laevis
Q8AVP8		Peptidyl-prolyl cis-trans isomerase (PPIase) (EC 5.2.1.8)	Xenopus laevis
Q8UVU2	lig3	DNA ligase (EC 6.5.1.1)	Xenopus laevis
Q91431		Nuclear factor 7, ovary (xNF7-O)	Xenopus laevis
Q91580	atp1b1	Sodium/potassium-transporting ATPase subunit beta	Xenopus laevis
Q91823	plxna1	Plexin	Xenopus laevis
Q9DDN8	akap12	Gravin-like	Xenopus laevis
A0AUT8		Uncharacterized protein (Fragment)	Xenopus laevis
A0JMT6	LOC443577	LOC443577 protein (Fragment)	Xenopus laevis
A0JMW3	ints7	LOC100036786 protein	Xenopus tropicalis
A0JMY7	slc27a6	MGC154930 protein	Xenopus tropicalis
A0JPG4	gas7	Gas7 protein	Xenopus laevis
A0JPG5	LOC100036792	MICOS complex subunit MIC60 (Mitofilin) (Fragment)	Xenopus laevis
A0JPH5	zc3h10	LOC100036797 protein	Xenopus laevis
A0MP03	myo1c-a	Unconventional myosin-Ic-A (Myosin I beta-A) (MMI-beta-A) (MMIb-A)	Xenopus laevis
A0T1H8		Catalase (EC 1.11.1.6)	Xenopus laevis
A1A5G6	atp6v0a1	V-type proton ATPase 116 kDa subunit a isoform 1 (V-ATPase 116 kDa isoform a1) (Vacuolar proton translocating ATPase 116 kDa subunit a isoform 1)	Xenopus laevis
A1A5I4		Uncharacterized protein	Xenopus laevis
A1A5J0	uhrf2	Uhrf2 protein	Xenopus tropicalis
A1A5J2	coq8a	LOC495397 protein	Xenopus tropicalis
A1A623	LOC431836	LOC431836 protein	Xenopus tropicalis
A1DPK8	tmod3	Tropomodulin	Xenopus laevis
A1L0Y6	vps33a	Vps33a protein	Xenopus tropicalis
A1L1G6	gse1	LOC100036836 protein	Xenopus tropicalis
A1L2I9	tmem214-b	Transmembrane protein 214-B	Homo sapiens
A1L2J8	LOC100036868	LOC100036868 protein (Fragment)	Xenopus laevis
A1L2M1		Uncharacterized protein (Fragment)	Xenopus laevis
A1L2N1	fkbp8	Peptidylprolyl isomerase (EC 5.2.1.8)	Xenopus laevis
A1L2N4	cd38	LOC100036901 protein	Homo sapiens
A1L2N7	nelfe	LOC100036904 protein	Xenopus laevis
A1L2N9	tmf1	LOC100036905 protein	Xenopus laevis
A1L2P4	casp3	LOC100036910 protein	Xenopus laevis
A1L2P5	hoxd3	Homeobox protein Hox-D3	Xenopus laevis
A1L2R0	LOC100036924	LOC100036924 protein (Fragment)	Xenopus laevis
A1L2T3	krt5.6	LOC100036944 protein	Xenopus laevis
A1L2T7	champ1	LOC100036948 protein	Xenopus laevis
A1L2W4	cryl1	LOC100036971 protein	Xenopus laevis
A1L2Y2	ndufb8	LOC100036987 protein	Xenopus laevis
A1L3D7	LOC779081	LOC779081 protein (Fragment)	Xenopus laevis
A1L3H7	LOC100037011	LOC100037011 protein (Fragment)	Xenopus tropicalis
A1L3M4	LOC100037045	LOC100037045 protein (Fragment)	Xenopus laevis
A1L3M8	LOC100037049	LOC100037049 protein (Fragment)	Xenopus laevis
A2BD55	LOC443610	LOC443610 protein (Fragment)	Xenopus laevis
A2BD64	mrps36	LOC100037103 protein	Xenopus laevis
A2BD83	paf1	RNA polymerase II-associated factor 1 homolog	Xenopus laevis
A2BDB5	LOC100037090	LOC100037090 protein (Fragment)	Xenopus laevis
A2BDC0	LOC779045	LOC779045 protein (Fragment)	Xenopus laevis
A2BEN1	atp6v1aa	ATPase, H+-transporting, lysosomal, V1 subunit Aa	Xenopus laevis
A2RRX4	LOC100037124	LOC100037124 protein (Fragment)	Xenopus laevis
A2RV57	atp2a2	Calcium-transporting ATPase (EC 3.6.3.8)	Rattus norvegicus
A2RV60	kiaa0368	LOC100037132 protein	Xenopus laevis
A2TBB3		Chondroitin sulfate proteoglycan 2	Bos taurus
A2VD89	serpini1	LOC734183 protein	Gallus gallus
A2VDE2	LOC100037232	LOC100037232 protein (Fragment)	Gallus gallus
A3FPG9	bdnf	Brain-derived neurotrophic factor (BDNF)	Canis lupus familiaris
A3KMI0	dhx29	ATP-dependent RNA helicase dhx29 (EC 3.6.4.13) (DEAH box protein 29)	Xenopus laevis
A3KNF7	tstd1	LOC100049124 protein	Xenopus laevis
A4IFW8	LOC733291	Aminopeptidase (EC 3.4.11.-) (Fragment)	Homo sapiens
A4IH34	LOC549535	LOC549535 protein	Homo sapiens
A4IH41	evl	Enah/Vasp-like (LOC100124792 protein)	Homo sapiens
A4IH51	fubp3	Fubp3 protein	Mus musculus
A4II62	eif4a2	Eukaryotic translation initiation factor 4A2 (LOC100124955 protein)	Xenopus laevis
A4II80	pcdh1	Pcdh1 protein	Xenopus laevis
A4IIU5	mpp2	Membrane protein, palmitoylated 2 (Mpp2 protein)	Xenopus laevis
A4IIV6	Sept5	LOC100125069 protein	Xenopus laevis
A4PID6	NPR	NADPH--cytochrome P450 reductase (CPR) (p450R) (EC 1.6.2.4)	Xenopus laevis
A4QNB1	fbxo28	LOC100125127 protein	Xenopus laevis
A4QNJ7	tomm70	LOC100125169 protein (Translocase of outer mitochondrial membrane 70)	Xenopus laevis
A4QNP1	acbd3	Acbd3 protein	Xenopus laevis
A5D8M1	LOC100049744	LOC100049744 protein (Fragment)	Xenopus laevis
A5D8N7	hspa14-a	Heat shock 70 kDa protein 14-A	Xenopus laevis
A5D8P8	emc10	ER membrane protein complex subunit 10	Homo sapiens
A5D8Q0	xiap	E3 ubiquitin-protein ligase XIAP (EC 2.3.2.27) (Baculoviral IAP repeat-containing protein 4) (RING-type E3 ubiquitin transferase XIAP) (X-linked inhibitor of apoptosis protein) (X-linked IAP) (xXIAP)	Xenopus laevis
A5PKQ8	LOC100101306	LOC100101306 protein (Fragment)	Danio rerio
A5PKR6	crym	LOC100101313 protein	Homo sapiens
A5XAW2	KHC	Kinesin-like protein (Fragment)	Xenopus laevis
A6H8I5	srp68	Signal recognition particle subunit SRP68 (SRP68)	Xenopus laevis
A7BK90	Msi1a	Musashi-1a	Homo sapiens
A7E222	LOC100125671	LOC100125671 protein (Fragment)	Homo sapiens
A8DZJ1	baz1b	Tyrosine-protein kinase BAZ1B (EC 2.7.10.2) (Bromodomain adjacent to zinc finger domain protein 1B) (Williams syndrome transcription factor homolog)	Bos taurus
A8E609	LOC733155	Na(+)/H(+) exchange regulatory cofactor NHE-RF	Xenopus laevis
A8E612	gtpbp4	LOC100126644 protein	Xenopus laevis
A8IJD0	Schip1	Schwannomin-interacting protein 1 (SCHIP-1)	Xenopus laevis
A8WH35	naa15	NMDA receptor regulated 1-like (Narg1l protein)	Xenopus laevis
A9JS47	LOC100127304	LOC100127304 protein (Fragment)	Xenopus laevis
A9JS76	LOC100127329	LOC100127329 protein	Xenopus laevis
A9JSN1	LOC100127765	LOC100127765 protein (Fragment)	Xenopus laevis
A9JSP5	MGC64521	Fatty acid binding protein 3, muscle and heart (Mammary-derived growth inhibitor)	Homo sapiens
A9JTJ1	LOC100127279	LOC100127279 protein	Xenopus laevis
A9QW73	grin2b	N-methyl-D-aspartate receptor subunit NR2B	Homo sapiens
A9ULM1	LOC100135217	LOC100135217 protein (Fragment)	Homo sapiens
A9ULX3	LOC100137638	LOC100137638 protein (Fragment)	Giardia intestinalis
A9UM29	vbp1	Prefoldin subunit 3	Xenopus laevis
B0BMQ6	gps2	Gps2 protein	Xenopus laevis
B0JZD3	LOC100145182	LOC100145182 protein (Fragment)	Homo sapiens
B1H1N3	LOC100037123	LOC100037123 protein (Fragment)	Homo sapiens
B1H1P1	LOC398524	LOC398524 protein (Fragment)	Xenopus laevis
B1H1P6	LOC414649	LOC414649 protein (Fragment)	Xenopus laevis
B1H1Q2	grsf1	LOC100158276 protein	Homo sapiens
B1H1T6	rufy1	LOC100158302 protein	Homo sapiens
B1H1U4		Uncharacterized protein (Fragment)	Homo sapiens
B1H1V0	LOC495286	LOC495286 protein (Fragment)	Xenopus laevis
B1H1X4	srrt-a	Serrate RNA effector molecule homolog A (Arsenite-resistance protein 2-A)	Xenopus laevis
B1H1Y2		Uncharacterized protein (Fragment)	Homo sapiens
B1WB15	sugp1	Splicing factor 4	Xenopus laevis
B1WB47	vbp1	Prefoldin subunit 3	Homo sapiens
B1WBA5	dnmt1	DNA (cytosine-5)-methyltransferase (EC 2.1.1.37)	Xenopus laevis
B1WBC6	atad2b	LOC100158428 protein	Homo sapiens
B1WBE0	eprs	LOC100158438 protein	Xenopus laevis
B2GTX6	LOC100158447	LOC100158447 protein (Fragment)	Homo sapiens
B2GU67	syn1	LOC100158514 protein	Xenopus laevis
B2GUD9	ppfia1	LOC100158566 protein	Xenopus laevis
B3DL85	MGC147163	MGC147163 protein	Homo sapiens
B3DLS4	LOC100174807	LOC100174807 protein (Fragment)	Xenopus laevis
B3DM01	LOC100170583	LOC100170583 protein (Fragment)	Homo sapiens
B3KUY1	SFRS2	Splicing factor, arginine/serine-rich 2, isoform CRA_d (cDNA FLJ40890 fis, clone UTERU2001024, highly similar to SPLICING FACTOR, ARGININE/SERINE-RICH 2)	Xenopus laevis
B3VIA2		Calcium-transporting ATPase (EC 3.6.3.8)	Homo sapiens
B4F6Q9	oxr1	Oxidation resistance protein 1	Homo sapiens
B6SE88	MYH11	Smooth muscle myosin heavy chain isoform SM1 (Fragment)	Homo sapiens
B7ZLQ8	CPEB4	CPEB4 protein (Cytoplasmic polyadenylation element-binding protein 4)	Xenopus laevis
B7ZP94	tax1bp1	Tax1 binding protein 1	Homo sapiens
B7ZQH3	LOC443721	LOC443721 protein	Homo sapiens
B7ZQK5	xrp1	Ribonucleoprotein	Xenopus laevis
B7ZQK9	cdh6-A	Cadherin 6, type 2, K-cadherin	Xenopus laevis
B7ZQP4		Uncharacterized protein	Xenopus laevis
B7ZRE3	NPR3	Natriuretic peptide receptor type C NPR-C	Xenopus laevis
B7ZRI4	casp9-A	Casp9-A protein	Xenopus laevis
B7ZRU8	Mtap4	Microtubule-associated protein	Xenopus laevis
B7ZS04	LOC398229	Brevican soluble core protein	Homo sapiens
B7ZSJ1	Calb1	Calbindin D28k	Xenopus laevis
B7ZU85	LOC548790	LOC548790 protein	Xenopus laevis
B9V8Q9		Ionotropic glutamate receptor subunit GluR6 (Fragment)	Xenopus laevis
B9V8R2		Ionotropic glutamate receptor subunit KA2 (Fragment)	Xenopus laevis
B9V8R7	gria1	Ionotropic glutamate receptor subunit GluR1(Q)flip	Homo sapiens
C0J6M5		MEF2A alpha 12b isoform	Homo sapiens
C1KC09	foxo4	Forkhead box O4	Xenopus laevis
D0EUZ9	Bcl9	B-cell lymphoma 9	Xenopus laevis
D0PSJ4	crim1	Cysteine-rich motor neuron 1	Homo sapiens
D0VEW8	rev3l	DNA polymerase zeta	Xenopus laevis
D2KAS8		Robo 2 (Fragment)	Xenopus laevis
D4A0F5	Sept7	Septin-7	Homo sapiens
D5LMF5	zmynd8	Zinc finger and MYND domain containing protein 8	Xenopus laevis
E1BB26	HEATR5B	HEAT repeat containing 5B	Homo sapiens
E1BS97	PAK2	p21 (RAC1) activated kinase 2	Xenopus laevis
E1BU14	TAF9	Uncharacterized protein	Xenopus laevis
E2QUM5		40S ribosomal protein S24	Homo sapiens
E3WDQ9	pum2	Pumilio homolog 2 (Pumilio-2)	Rattus norvegicus
E5LEX9	Gabbr1	Gamma-aminobutyric acid B receptor 1 (Fragment)	Homo sapiens
O00148	DDX39A	ATP-dependent RNA helicase DDX39A (EC 3.6.4.13) (DEAD box protein 39) (Nuclear RNA helicase URH49)	Xenopus laevis
O00232	PSMD12	26S proteasome non-ATPase regulatory subunit 12 (26S proteasome regulatory subunit RPN5) (26S proteasome regulatory subunit p55)	Homo sapiens
O00487	PSMD14	26S proteasome non-ATPase regulatory subunit 14 (EC 3.4.19.-) (26S proteasome regulatory subunit RPN11) (26S proteasome-associated PAD1 homolog 1)	Xenopus laevis
O08553	Dpysl2	Dihydropyrimidinase-related protein 2 (DRP-2) (Unc-33-like phosphoprotein 2) (ULIP-2)	Xenopus laevis
O12982	adar	DsRNA adenosine deaminase	Homo sapiens
O13024	incenp-a	Inner centromere protein A (XL-INCENP) (xINC) (xIncenp) (Mitotic phosphoprotein 130)	Homo sapiens
O13027	epn2	Mitotic phosphoprotein 90	Xenopus laevis
O13099	NF-M(2)	Middle molecular weight neurofilament protein NF-M(2) (Neurofilament protein)	Xenopus laevis
O42123	fkbp1a	Peptidyl-prolyl cis-trans isomerase FKBP1A (PPIase FKBP1A) (EC 5.2.1.8) (12 kDa FK506-binding protein) (12 kDa FKBP) (FKBP-12) (FK506-binding protein 1A) (FKBP-1A) (Immunophilin FKBP12) (Rotamase)	Xenopus laevis
O42226	eif4a3-b	Eukaryotic initiation factor 4A-III-B (XeIF-4AIII) (eIF-4A-III-B) (eIF4A-III-B) (EC 3.6.4.13) (ATP-dependent RNA helicase DDX48-B) (ATP-dependent RNA helicase eIF4A-3-B) (DEAD box protein 48-B) (Eukaryotic translation initiation factor 4A isoform 3-B)	Homo sapiens
O42338	LOC397711	Receptor protein serine/threonine kinase (EC 2.7.11.30)	Homo sapiens
O42573	nedd4	Nedd4 protein	Homo sapiens
O43252	PAPSS1	Bifunctional 3'-phosphoadenosine 5'-phosphosulfate synthase 1 (PAPS synthase 1) (PAPSS 1) (Sulfurylase kinase 1) (SK 1) (SK1) [Includes: Sulfate adenylyltransferase (EC 2.7.7.4) (ATP-sulfurylase) (Sulfate adenylate transferase) (SAT); Adenylyl-sulfate kinase (EC 2.7.1.25) (3'-phosphoadenosine-5'-phosphosulfate synthase) (APS kinase) (Adenosine-5'-phosphosulfate 3'-phosphotransferase) (Adenylylsul…	Homo sapiens
O57478	fech	Ferrochelatase, mitochondrial (EC 4.99.1.1) (Heme synthase) (Protoheme ferro-lyase)	Homo sapiens
O57521	hsp90ab1	Heat shock protein HSP 90-beta	Homo sapiens
O60506	SYNCRIP	Heterogeneous nuclear ribonucleoprotein Q (hnRNP Q) (Glycine- and tyrosine-rich RNA-binding protein) (GRY-RBP) (NS1-associated protein 1) (Synaptotagmin-binding, cytoplasmic RNA-interacting protein)	Homo sapiens
O73786	CSK	Tyrosine-protein kinase (EC 2.7.10.2)	Homo sapiens
O73798	igf1r	Insulin-like growth factor 1 receptor (xIGF-1R) (xIGFR) (EC 2.7.10.1) [Cleaved into: Insulin-like growth factor 1 receptor alpha chain; Insulin-like growth factor 1 receptor beta chain]	Homo sapiens
O75533	SF3B1	Splicing factor 3B subunit 1 (Pre-mRNA-splicing factor SF3b 155 kDa subunit) (SF3b155) (Spliceosome-associated protein 155) (SAP 155)	Homo sapiens
O75914	PAK3	Serine/threonine-protein kinase PAK 3 (EC 2.7.11.1) (Beta-PAK) (Oligophrenin-3) (p21-activated kinase 3) (PAK-3)	Homo sapiens
O77807		Fibroblast growth factor receptor type 1 (Fragment)	Homo sapiens
O93478	kif3b	Kinesin-like protein	Homo sapiens
O93614	rap1gds1-a	Rap1 GTPase-GDP dissociation stimulator 1-A (Rap1gds1-A protein) (RalB-binding protein A) (XsmgGDS-A) (smgGDS-A)	Homo sapiens
P01112	HRAS	GTPase HRas (H-Ras-1) (Ha-Ras) (Transforming protein p21) (c-H-ras) (p21ras) [Cleaved into: GTPase HRas, N-terminally processed]	Homo sapiens
P02385	rpl4-b	60S ribosomal protein L4-B (L1B)	Homo sapiens
P04350	TUBB4A	Tubulin beta-4A chain (Tubulin 5 beta) (Tubulin beta-4 chain)	Homo sapiens
P05198	EIF2S1	Eukaryotic translation initiation factor 2 subunit 1 (Eukaryotic translation initiation factor 2 subunit alpha) (eIF-2-alpha) (eIF-2A) (eIF-2alpha)	Homo sapiens
P05304		Tubulin beta chain (Beta-tubulin)	Homo sapiens
P05781	xk81b2	Keratin, type I cytoskeletal 47 kDa	Homo sapiens
P06172	rbp4	Retinol-binding protein 4 (Plasma retinol-binding protein) (PRBP)	Caenorhabditis elegans
P06733	ENO1	Alpha-enolase (EC 4.2.1.11) (2-phospho-D-glycerate hydro-lyase) (C-myc promoter-binding protein) (Enolase 1) (MBP-1) (MPB-1) (Non-neural enolase) (NNE) (Phosphopyruvate hydratase) (Plasminogen-binding protein)	Homo sapiens
P07900	HSP90AA1	Heat shock protein HSP 90-alpha (Heat shock 86 kDa) (HSP 86) (HSP86) (Lipopolysaccharide-associated protein 2) (LAP-2) (LPS-associated protein 2) (Renal carcinoma antigen NY-REN-38)	Homo sapiens
P08776		Keratin, type II cytoskeletal 8 (Cytokeratin-8) (CK-8) (Keratin-8) (K8)	Homo sapiens
P09010		Lamin-L(I)	Homo sapiens
P09234	SNRPC	U1 small nuclear ribonucleoprotein C (U1 snRNP C) (U1-C) (U1C)	Homo sapiens
P09471	GNAO1	Guanine nucleotide-binding protein G(o) subunit alpha	Xenopus laevis
P10644	PRKAR1A	cAMP-dependent protein kinase type I-alpha regulatory subunit (Tissue-specific extinguisher 1) (TSE1)	Xenopus laevis
P10995	act2	Actin, alpha skeletal muscle 2 (Actin alpha 2) (alpha2) (alpha2p)	Xenopus laevis
P10999		Lamin-L(III) (Lamin-B3)	Xenopus laevis
P11021	HSPA5	78 kDa glucose-regulated protein (GRP-78) (Endoplasmic reticulum lumenal Ca(2+)-binding protein grp78) (Heat shock 70 kDa protein 5) (Immunoglobulin heavy chain-binding protein) (BiP)	Homo sapiens
P11048	lmna	Lamin-A	Xenopus laevis
P11142	HSPA8	Heat shock cognate 71 kDa protein (Heat shock 70 kDa protein 8) (Lipopolysaccharide-associated protein 1) (LAP-1) (LPS-associated protein 1)	Xenopus laevis
P11434	epb41	Cytoskeletal protein 4.1 (Band 4.1)	Homo sapiens
P11940	PABPC1	Polyadenylate-binding protein 1 (PABP-1) (Poly(A)-binding protein 1)	Xenopus laevis
P12606	itgb1-a	Integrin beta-1-A	Xenopus laevis
P13639	EEF2	Elongation factor 2 (EF-2)	Xenopus laevis
P17130	hnrnpa1	Heterogeneous nuclear ribonucleoproteins A1 homolog (hnRNP A1) (Helix-destabilizing protein) (Single-strand-binding protein) (hnRNP core protein A1)	Xenopus laevis
P17980	PSMC3	26S proteasome regulatory subunit 6A (26S proteasome AAA-ATPase subunit RPT5) (Proteasome 26S subunit ATPase 3) (Proteasome subunit P50) (Tat-binding protein 1) (TBP-1)	Homo sapiens
P18248	pcna	Proliferating cell nuclear antigen (PCNA) (Cyclin)	Homo sapiens
P19105	MYL12A	Myosin regulatory light chain 12A (Epididymis secretory protein Li 24) (HEL-S-24) (MLC-2B) (Myosin RLC) (Myosin regulatory light chain 2, nonsarcomeric) (Myosin regulatory light chain MRLC3)	Xenopus laevis
P20336	RAB3A	Ras-related protein Rab-3A	Xenopus laevis
P20340	RAB6A	Ras-related protein Rab-6A (Rab-6)	Xenopus tropicalis
P20839	IMPDH1	Inosine-5'-monophosphate dehydrogenase 1 (IMP dehydrogenase 1) (IMPD 1) (IMPDH 1) (EC 1.1.1.205) (IMPDH-I)	Homo sapiens
P21188	atp1b3	Sodium/potassium-transporting ATPase subunit beta-3 (Sodium/potassium-dependent ATPase subunit beta-3) (ATPB-3)	Homo sapiens
P21281	ATP6V1B2	V-type proton ATPase subunit B, brain isoform (V-ATPase subunit B 2) (Endomembrane proton pump 58 kDa subunit) (HO57) (Vacuolar proton pump subunit B 2)	Xenopus laevis
P21283	ATP6V1C1	V-type proton ATPase subunit C 1 (V-ATPase subunit C 1) (Vacuolar proton pump subunit C 1)	Xenopus laevis
P21910		Lamin-L(II)	Xenopus tropicalis
P22182	fgfr1	Fibroblast growth factor receptor 1 (FGFR-1) (EC 2.7.10.1)	Homo sapiens
P22844	h1f0-b	Histone H1.0-B (H1-SA) (H1D) (Histone H1(0)-2) (Histone H5A) (XlH5A)	Xenopus laevis
P24346	an3	Putative ATP-dependent RNA helicase an3 (EC 3.6.4.13)	Xenopus laevis
P25183	rcc1	Regulator of chromosome condensation	Xenopus laevis
P25705	ATP5A1	ATP synthase subunit alpha, mitochondrial	Xenopus laevis
P27004	s100a10	Protein S100-A10 (Calpactin I light chain) (Calpactin-1 light chain) (Cellular ligand of annexin II) (S100 calcium-binding protein A10) (p10 protein) (p11)	Xenopus laevis
P27006	anxa2-a	Annexin A2-A (Annexin II type I) (Annexin-2-A) (Calpactin I heavy chain) (Calpactin-1 heavy chain) (Lipocortin II)	Xenopus laevis
P28049	ssb-b	Lupus La protein homolog B (La autoantigen homolog B) (La ribonucleoprotein B)	Xenopus tropicalis
P28482	MAPK1	Mitogen-activated protein kinase 1 (MAP kinase 1) (MAPK 1) (EC 2.7.11.24) (ERT1) (Extracellular signal-regulated kinase 2) (ERK-2) (MAP kinase isoform p42) (p42-MAPK) (Mitogen-activated protein kinase 2) (MAP kinase 2) (MAPK 2)	Xenopus laevis
P30153	PPP2R1A	Serine/threonine-protein phosphatase 2A 65 kDa regulatory subunit A alpha isoform (Medium tumor antigen-associated 61 kDa protein) (PP2A subunit A isoform PR65-alpha) (PP2A subunit A isoform R1-alpha)	Xenopus laevis
P30998	jup	Junction plakoglobin (Desmoplakin III) (Desmoplakin-3)	Xenopus tropicalis
P33689	npy	Pro-neuropeptide Y [Cleaved into: Neuropeptide Y (Neuropeptide tyrosine) (NPY); C-flanking peptide of NPY (CPON)]	Xenopus laevis
P35222	CTNNB1	Catenin beta-1 (Beta-catenin)	Xenopus laevis
P35617		Low molecular weight neuronal intermediate filament (XNIF)	Xenopus laevis
P37137	lhx5	LIM/homeobox protein Lhx5 (LIM homeobox protein 5) (Homeobox protein LIM-5) (xLIM-5) (xLIM-2A)	Xenopus laevis
P40763	STAT3	Signal transducer and activator of transcription 3 (Acute-phase response factor)	Xenopus laevis
P41512	top1	DNA topoisomerase 1 (EC 5.99.1.2) (DNA topoisomerase I)	Xenopus tropicalis
P43034	PAFAH1B1	Platelet-activating factor acetylhydrolase IB subunit alpha (Lissencephaly-1 protein) (LIS-1) (PAF acetylhydrolase 45 kDa subunit) (PAF-AH 45 kDa subunit) (PAF-AH alpha) (PAFAH alpha)	Xenopus tropicalis
P45695	cfl1-a	Cofilin-1-A (ADF/cofilin-1) (XAC1)	Xenopus tropicalis
P47193	vamp2	Vesicle-associated membrane protein 2 (VAMP-2) (SYBII) (Synaptobrevin-2)	Xenopus laevis
P48729	CSNK1A1	Casein kinase I isoform alpha (CKI-alpha) (EC 2.7.11.1) (CK1)	Xenopus laevis
P49185	Mapk8	Mitogen-activated protein kinase 8 (MAP kinase 8) (MAPK 8) (EC 2.7.11.24) (SAPK gamma) (Stress-activated protein kinase JNK1) (c-Jun N-terminal kinase 1) (p54 gamma)	Xenopus tropicalis
P49903	SEPHS1	Selenide, water dikinase 1 (EC 2.7.9.3) (Selenium donor protein 1) (Selenophosphate synthase 1)	Xenopus tropicalis
P50395	GDI2	Rab GDP dissociation inhibitor beta (Rab GDI beta) (Guanosine diphosphate dissociation inhibitor 2) (GDI-2)	Xenopus tropicalis
P50533	smc2	Structural maintenance of chromosomes protein 2 (SMC protein 2) (SMC-2) (Chromosome assembly protein XCAP-E) (Chromosome-associated protein E)	Xenopus tropicalis
P50993	ATP1A2	Sodium/potassium-transporting ATPase subunit alpha-2 (Na(+)/K(+) ATPase alpha-2 subunit) (EC 3.6.3.9) (Sodium pump subunit alpha-2)	Xenopus laevis
P51665	PSMD7	26S proteasome non-ATPase regulatory subunit 7 (26S proteasome regulatory subunit RPN8) (26S proteasome regulatory subunit S12) (Mov34 protein homolog) (Proteasome subunit p40)	Xenopus tropicalis
P51893	ahcy-a	Adenosylhomocysteinase A (AdoHcyase A) (EC 3.3.1.1) (S-adenosyl-L-homocysteine hydrolase A)	Homo sapiens
P51951	mnat1	CDK-activating kinase assembly factor MAT1 (CDK7/cyclin-H assembly factor) (Menage a trois) (RING finger protein MAT1)	Homo sapiens
P51990		Heterogeneous nuclear ribonucleoprotein A2 homolog 2 (hnRNP A2(B))	Homo sapiens
P53396	ACLY	ATP-citrate synthase (EC 2.3.3.8) (ATP-citrate (pro-S-)-lyase) (ACL) (Citrate cleavage enzyme)	Homo sapiens
P55036	PSMD4	26S proteasome non-ATPase regulatory subunit 4 (26S proteasome regulatory subunit RPN10) (26S proteasome regulatory subunit S5A) (Antisecretory factor 1) (AF) (ASF) (Multiubiquitin chain-binding protein)	Homo sapiens
P55072	VCP	Transitional endoplasmic reticulum ATPase (TER ATPase) (EC 3.6.4.6) (15S Mg(2+)-ATPase p97 subunit) (Valosin-containing protein) (VCP)	Homo sapiens
P56211	ARPP19	cAMP-regulated phosphoprotein 19 (ARPP-19)	Homo sapiens
P60709	ACTB	Actin, cytoplasmic 1 (Beta-actin) [Cleaved into: Actin, cytoplasmic 1, N-terminally processed]	Homo sapiens
P60880	SNAP25	Synaptosomal-associated protein 25 (SNAP-25) (Super protein) (SUP) (Synaptosomal-associated 25 kDa protein)	Homo sapiens
P61011	SRP54	Signal recognition particle 54 kDa protein (SRP54)	Homo sapiens
P61160	ACTR2	Actin-related protein 2 (Actin-like protein 2)	Homo sapiens
P61165	TMEM258	Transmembrane protein 258	Homo sapiens
P61204	ARF3	ADP-ribosylation factor 3	Homo sapiens
P61601	NCALD	Neurocalcin-delta	Danio rerio
P61764	STXBP1	Syntaxin-binding protein 1 (MUNC18-1) (N-Sec1) (Protein unc-18 homolog 1) (Unc18-1) (Protein unc-18 homolog A) (Unc-18A) (p67)	Homo sapiens
P61962	DCAF7	DDB1- and CUL4-associated factor 7 (WD repeat-containing protein 68) (WD repeat-containing protein An11 homolog)	Xenopus laevis
P61981	YWHAG	14-3-3 protein gamma (Protein kinase C inhibitor protein 1) (KCIP-1) [Cleaved into: 14-3-3 protein gamma, N-terminally processed]	Xenopus laevis
P62070	RRAS2	Ras-related protein R-Ras2 (Ras-like protein TC21) (Teratocarcinoma oncogene)	Xenopus tropicalis
P62158	CALM	Calmodulin	Xenopus tropicalis
P62258	YWHAE	14-3-3 protein epsilon (14-3-3E)	Xenopus tropicalis
P62495	ETF1	Eukaryotic peptide chain release factor subunit 1 (Eukaryotic release factor 1) (eRF1) (Protein Cl1) (TB3-1)	Xenopus tropicalis
P62714	PPP2CB	Serine/threonine-protein phosphatase 2A catalytic subunit beta isoform (PP2A-beta) (EC 3.1.3.16)	Xenopus tropicalis
P62760	VSNL1	Visinin-like protein 1 (VILIP) (VLP-1) (Hippocalcin-like protein 3) (HLP3)	Xenopus tropicalis
P62784	his-1	Histone H4	Xenopus tropicalis
P62820	RAB1A	Ras-related protein Rab-1A (YPT1-related protein)	Xenopus tropicalis
P62879	GNB2	Guanine nucleotide-binding protein G(I)/G(S)/G(T) subunit beta-2 (G protein subunit beta-2) (Transducin beta chain 2)	Xenopus tropicalis
P62993	GRB2	Growth factor receptor-bound protein 2 (Adapter protein GRB2) (Protein Ash) (SH2/SH3 adapter GRB2)	Xenopus tropicalis
P63244	RACK1	Receptor of activated protein C kinase 1 (Cell proliferation-inducing gene 21 protein) (Guanine nucleotide-binding protein subunit beta-2-like 1) (Guanine nucleotide-binding protein subunit beta-like protein 12.3) (Human lung cancer oncogene 7 protein) (HLC-7) (Receptor for activated C kinase) (Small ribosomal subunit protein RACK1) [Cleaved into: Receptor of activated protein C kinase 1, N-termi…	Xenopus tropicalis
P68104	EEF1A1	Elongation factor 1-alpha 1 (EF-1-alpha-1) (Elongation factor Tu) (EF-Tu) (Eukaryotic elongation factor 1 A-1) (eEF1A-1) (Leukocyte receptor cluster member 7)	Xenopus tropicalis
P70012	numa1	Nuclear/mitotic apparatus protein	Xenopus tropicalis
P70047	myt1	Myelin transcription factor 1 (X-MyT1)	Xenopus tropicalis
P84085	ARF5	ADP-ribosylation factor 5	Xenopus tropicalis
P85120	ccdc88c	Daple-like protein (Coiled-coil domain-containing protein 88C-like) (Dvl-associating protein with a high frequency of leucine residues-like) (xDal)	Xenopus tropicalis
P98999	adcy9	Adenylate cyclase type 9 (EC 4.6.1.1) (ATP pyrophosphate-lyase 9) (Adenylate cyclase type IX) (Adenylyl cyclase 9) (xlAC)	Xenopus tropicalis
Q00610	CLTC	Clathrin heavy chain 1 (Clathrin heavy chain on chromosome 17) (CLH-17)	Xenopus tropicalis
Q00643	trh-b	Pro-thyrotropin-releasing hormone-B (Pro-TRH-B) (Prothyroliberin type B) [Cleaved into: Thyrotropin-releasing hormone (TRH) (Protirelin) (TSH-releasing factor) (Thyroliberin) (Thyrotropin-releasing factor) (TRF)]	Xenopus tropicalis
Q01550		Tanabin	Xenopus tropicalis
Q01588	rpa1	Replication protein A 70 kDa DNA-binding subunit (RP-A p70) (Replication factor A protein 1) (RF-A protein 1) (Single-stranded DNA-binding protein)	Xenopus tropicalis
Q04917	YWHAH	14-3-3 protein eta (Protein AS1)	Xenopus tropicalis
Q05586	GRIN1	Glutamate receptor ionotropic, NMDA 1 (GluN1) (Glutamate [NMDA] receptor subunit zeta-1) (N-methyl-D-aspartate receptor subunit NR1) (NMD-R1)	Xenopus laevis
Q05AU8	txlna	Txlnb protein	Xenopus laevis
Q05AX6	krt19	Krt19 protein	Xenopus laevis
Q05B09	LOC548959	LOC548959 protein	Xenopus laevis
Q05CU6	RDX	RDX protein (Fragment)	Xenopus laevis
Q06210	GFPT1	Glutamine--fructose-6-phosphate aminotransferase [isomerizing] 1 (EC 2.6.1.16) (D-fructose-6-phosphate amidotransferase 1) (Glutamine:fructose-6-phosphate amidotransferase 1) (GFAT 1) (GFAT1) (Hexosephosphate aminotransferase 1)	Xenopus laevis
Q06275		Integrin alpha 6 subunit (Fragment)	Xenopus laevis
Q08209	PPP3CA	Serine/threonine-protein phosphatase 2B catalytic subunit alpha isoform (EC 3.1.3.16) (CAM-PRP catalytic subunit) (Calmodulin-dependent calcineurin A subunit alpha isoform)	Xenopus laevis
Q08AV4	lbr-A	Lbr-A protein	Homo sapiens
Q08AX4	gatad2a	LOC100158394 protein	Xenopus laevis
Q08B03	LOC100158371	LOC100158371 protein	Xenopus laevis
Q08B06	cpe	LOC100158368 protein	Xenopus laevis
Q08B28	usp7	LOC100158365 protein	Xenopus laevis
Q08B62	lsp1	LOC100158340 protein	Xenopus laevis
Q0D260	uchl5	Ubiquitin carboxyl-terminal hydrolase (EC 3.4.19.12)	Xenopus laevis
Q0D2D9	vps45	Vacuolar protein sorting 45A	Xenopus laevis
Q0IH28	dhrs7b	Dehydrogenase/reductase SDR family member 7B (EC 1.1.-.-) (Short-chain dehydrogenase/reductase family 32C member 1)	Xenopus laevis
Q0IH96	clta	Clathrin light chain	Xenopus laevis
Q0IHH1	naa30	N-alpha-acetyltransferase 30 (EC 2.3.1.256) (N-acetyltransferase 12) (N-acetyltransferase MAK3 homolog) (NatC catalytic subunit)	Xenopus laevis
Q0IHH7	MGC154345	MGC154345 protein	Xenopus laevis
Q0P4S8	fez1	Zygin 1	Xenopus laevis
Q0P4U1	ophn1	Oligophrenin 1	Xenopus laevis
Q0P4X7	slc2a1	Glucose transporter 14	Xenopus laevis
Q0PF19		N-ethylmaleimide sensitive factor	Xenopus laevis
Q0PNF8	dach1	Dachshund 1	Xenopus laevis
Q0V9A6	homer3	Homer scaffolding protein 3 (Homer3 protein) (Fragment)	Xenopus laevis
Q0V9H1	ntn1	Netrin 1	Xenopus laevis
Q0V9Y0	dync1li1	Dynein, cytoplasmic 1, light intermediate chain 1	Xenopus laevis
Q0VA85	mki67	Mki67 protein (Fragment)	Cynops pyrrhogaster
Q0VFM7	tekt1	Tektin 1	Xenopus laevis
Q12996	CSTF3	Cleavage stimulation factor subunit 3 (CF-1 77 kDa subunit) (Cleavage stimulation factor 77 kDa subunit) (CSTF 77 kDa subunit) (CstF-77)	Xenopus laevis
Q13188	STK3	Serine/threonine-protein kinase 3 (EC 2.7.11.1) (Mammalian STE20-like protein kinase 2) (MST-2) (STE20-like kinase MST2) (Serine/threonine-protein kinase Krs-1) [Cleaved into: Serine/threonine-protein kinase 3 36kDa subunit (MST2/N); Serine/threonine-protein kinase 3 20kDa subunit (MST2/C)]	Xenopus laevis
Q13347	EIF3I	Eukaryotic translation initiation factor 3 subunit I (eIF3i) (Eukaryotic translation initiation factor 3 subunit 2) (TGF-beta receptor-interacting protein 1) (TRIP-1) (eIF-3-beta) (eIF3 p36)	Xenopus laevis
Q13394	MAB21L1	Putative nucleotidyltransferase MAB21L1 (EC 2.7.7.-) (Protein mab-21-like 1)	Xenopus laevis
Q13616	CUL1	Cullin-1 (CUL-1)	Xenopus laevis
Q13618	CUL3	Cullin-3 (CUL-3)	Xenopus laevis
Q13627	DYRK1A	Dual specificity tyrosine-phosphorylation-regulated kinase 1A (EC 2.7.12.1) (Dual specificity YAK1-related kinase) (HP86) (Protein kinase minibrain homolog) (MNBH) (hMNB)	Xenopus laevis
Q13765	NACA	Nascent polypeptide-associated complex subunit alpha (NAC-alpha) (Alpha-NAC) (allergen Hom s 2)	Xenopus laevis
Q13838	DDX39B	Spliceosome RNA helicase DDX39B (EC 3.6.4.13) (56 kDa U2AF65-associated protein) (ATP-dependent RNA helicase p47) (DEAD box protein UAP56) (HLA-B-associated transcript 1 protein)	Xenopus laevis
Q13885	TUBB2A	Tubulin beta-2A chain (Tubulin beta class IIa)	Xenopus laevis
Q14669	TRIP12	E3 ubiquitin-protein ligase TRIP12 (EC 2.3.2.26) (E3 ubiquitin-protein ligase for Arf) (ULF) (HECT-type E3 ubiquitin transferase TRIP12) (Thyroid receptor-interacting protein 12) (TR-interacting protein 12) (TRIP-12)	Xenopus laevis
Q14683	SMC1A	Structural maintenance of chromosomes protein 1A (SMC protein 1A) (SMC-1-alpha) (SMC-1A) (Sb1.8)	Xenopus laevis
Q15029	EFTUD2	116 kDa U5 small nuclear ribonucleoprotein component (Elongation factor Tu GTP-binding domain-containing protein 2) (SNU114 homolog) (hSNU114) (U5 snRNP-specific protein, 116 kDa) (U5-116 kDa)	Xenopus laevis
Q15KE4	gng2	Guanine nucleotide-binding protein subunit gamma	Xenopus laevis
Q16204	CCDC6	Coiled-coil domain-containing protein 6 (Papillary thyroid carcinoma-encoded protein) (Protein H4)	Xenopus laevis
Q1PAH4	hsp110	Heat shock protein 110	Xenopus laevis
Q28BK3	acadl	Acyl-CoA dehydrogenase long chain (Acyl-Coenzyme A dehydrogenase, long chain)	Xenopus laevis
Q28BK4	fam50a	Protein FAM50A	Xenopus laevis
Q28BL9	smarcd2	SWI/SNF-related, matrix-associated, actin-dependent regulator of chromatin, subfamily d, member 2	Xenopus laevis
Q28BR2	fubp1	OTTXETP00000007035	Xenopus laevis
Q28C82	flot1	Flotillin 1	Xenopus laevis
Q28CJ1	syngr1	Synaptogyrin	Xenopus laevis
Q28CS1	hgs	Hepatocyte growth factor-regulated tyrosine kinase substrate	Xenopus laevis
Q28DI9	g6pd	Glucose-6-phosphate 1-dehydrogenase (EC 1.1.1.49)	Xenopus laevis
Q28DK6	hnrnpu	Heterogeneous Nuclear ribonucleoprotein U (scaffold attachment factor A)	Xenopus laevis
Q28DY0	wbp11	WW domain binding protein 11	Xenopus laevis
Q28E41	rnps1	RNA-binding protein with serine-rich domain 1	Xenopus laevis
Q28E96	arcn1	Coatomer subunit delta	Xenopus laevis
Q28EU7	aldh2	Aldehyde dehydrogenase 2 family (Mitochondrial)	Xenopus laevis
Q28F51	tardbp	TAR DNA-binding protein 43 (TDP-43)	Xenopus laevis
Q28FB9	alyref	THO complex subunit 4 (Tho4) (Aly/REF export factor)	Xenopus laevis
Q28FU2	cnpy2	Canopy FGF-signaling regulator 2 (Transmembrane protein 4)	Xenopus laevis
Q28G85	luc7l3	Cisplatin resistance-associated overexpressed protein	Xenopus tropicalis
Q28H32	ech1	Enoyl coenzyme A hydratase 1, peroxisomal	Xenopus laevis
Q28J34	erlin2	Erlin-2 (Endoplasmic reticulum lipid raft-associated protein 2) (Stomatin-prohibitin-flotillin-HflC/K domain-containing protein 2) (SPFH domain-containing protein 2)	Xenopus laevis
Q28J74	atp5o	ATP synthase, H+ transporting, mitochondrial F1 complex, O subunit (Oligomycin sensitivity conferring protein)	Xenopus tropicalis
Q2KHQ3	daxx	LOC446279 protein	Xenopus laevis
Q2NLB3	usp4	LOC398480 protein	Xenopus laevis
Q2TAF0	Catna1	Catna1 protein (Fragment)	Xenopus laevis
Q2TAF8	lonp2	Lon protease homolog 2, peroxisomal (EC 3.4.21.53)	Xenopus laevis
Q2TAG9	srsf11	MGC132092 protein	Xenopus laevis
Q2TAQ4	uvrag	MGC131135 protein	Xenopus laevis
Q2TAS5	trim28	MGC130965 protein	Xenopus laevis
Q2TAV5	ilf3	CBTF122 protein	Xenopus laevis
Q2TAY7	SMU1	WD40 repeat-containing protein SMU1 (Smu-1 suppressor of mec-8 and unc-52 protein homolog) [Cleaved into: WD40 repeat-containing protein SMU1, N-terminally processed]	Xenopus laevis
Q2VPF5	stau2	Stau2-b protein	Xenopus laevis
Q2VPF7	aatf	Uncharacterized protein	Xenopus tropicalis
Q2VPG7	napg	MGC132185 protein	Xenopus laevis
Q2VPG8	hmox1	MGC132176 protein	Xenopus laevis
Q2VPH0	nasp	MGC132155 protein	Xenopus laevis
Q2VPK9	acox1	Acyl-coenzyme A oxidase	Xenopus laevis
Q32N78	rbm14	MGC52864 protein	Xenopus laevis
Q32N83	zmym4	LOC414497 protein	Xenopus laevis
Q32N98	LOC495430	LOC495430 protein (Fragment)	Xenopus laevis
Q32NI1	LOC733408	LOC733408 protein (Fragment)	Xenopus tropicalis
Q32NM2	MGC131041	MGC131041 protein	Xenopus tropicalis
Q32NQ5	thoc6	MGC130957 protein	Xenopus tropicalis
Q32NR3	rfx2	DNA-binding protein RFX2 (Regulatory factor X 2)	Xenopus tropicalis
Q32NR8	ndufs2	MGC130896 protein	Homo sapiens
Q32NT3	MGC52584	MGC52584 protein	Xenopus laevis
Q32NX2		Uncharacterized protein	Xenopus laevis
Q32NX3	MGC130644	MGC130644 protein	Xenopus laevis
Q33CJ3	SNAP25	Synaptosomal-associated protein	Xenopus tropicalis
Q3B8B0	tmem199	MGC132241 protein	Xenopus tropicalis
Q3B8B3	uchl1	Ubiquitin carboxyl-terminal hydrolase (EC 3.4.19.12)	Xenopus laevis
Q3B8H8	uba3	MGC131020 protein	Xenopus tropicalis
Q3KPR0	eci2	MGC132021 protein	Xenopus tropicalis
Q3KQ64	LOC733343	MICOS complex subunit MIC60 (Mitofilin) (Fragment)	Xenopus laevis
Q3KQ84	reep5	Receptor expression-enhancing protein	Xenopus laevis
Q3KQG0	etfa	LOC496165 protein	Xenopus laevis
Q3KQW7	limch1	LIM and calponin homology domains-containing protein 1	Xenopus laevis
Q45TX8	ric8a	Synembryn-A (Protein Ric-8A)	Xenopus laevis
Q498F7	smpd3	MGC115457 protein	Xenopus laevis
Q498H8	myl6	MGC84744 protein	Xenopus laevis
Q498I7	zadh2	LOC432094 protein	Xenopus laevis
Q498L0	cep170b	Centrosomal protein of 170 kDa protein B (Centrosomal protein 170B) (Cep170B)	Xenopus laevis
Q498L2	sltm	SAFB-like transcription modulator	Xenopus laevis
Q4KL98	stoml2	MGC116533 protein	Xenopus tropicalis
Q4KLA7	stmn3	Stathmin	Xenopus tropicalis
Q4KLA8	rgs6	MGC116511 protein	Xenopus laevis
Q4KLC4	ngdn-a	Neuroguidin-A (EIF4E-binding protein A)	Xenopus laevis
Q4KLC5	MGC116485	MGC116485 protein	Xenopus laevis
Q4KLS6	inpp4a	MGC115479 protein	Xenopus tropicalis
Q4KLT6	wtap	Pre-mRNA-splicing regulator WTAP (Female-lethal(2)D homolog) (WT1-associated protein) (Wilms tumor 1-associating protein)	Xenopus tropicalis
Q4QR30	pmpca	MGC114896 protein	Xenopus tropicalis
Q4U2I1	53BP1	53BP1 protein (Fragment)	Xenopus laevis
Q4V7M9	sugp2	MGC115540 protein	Xenopus laevis
Q4V7P5	cgnl1	LOC431812 protein	Xenopus laevis
Q4V7R3	coq5	2-methoxy-6-polyprenyl-1,4-benzoquinol methylase, mitochondrial (EC 2.1.1.201) (Ubiquinone biosynthesis methyltransferase COQ5)	Xenopus laevis
Q4V7V6	prodh	Proline dehydrogenase (EC 1.5.5.2)	Xenopus laevis
Q4V7W4	atxn2	MGC115230 protein	Xenopus laevis
Q4V833	ppig	Peptidyl-prolyl cis-trans isomerase (PPIase) (EC 5.2.1.8)	Xenopus laevis
Q4V836	ddx27	MGC114699 protein	Xenopus laevis
Q4VBE0	ubqln4	Ubiquilin 4	Xenopus laevis
Q4VQ79	smarca4	Brg1	Xenopus laevis
Q501Q0	adipor1	MGC114758 protein	Xenopus laevis
Q504Q2	pls3	Plastin 3 (Plastin 3 (T isoform))	Pongo abelii
Q50EN5	emd	Xemerin2	Xenopus tropicalis
Q52KD2	ptpa-A-prov	Receptor-type tyrosine-protein phosphatase (EC 3.1.3.48)	Xenopus laevis
Q52KD5	LOC733229	LOC733229 protein (Fragment)	Mus musculus
Q52KN8	aplp1	MGC115336 protein	Xenopus tropicalis
Q52KN9	cwc22	Pre-mRNA-splicing factor CWC22 homolog (Nucampholin homolog)	Xenopus laevis
Q52KX6	retreg2	MGC115260 protein	Xenopus laevis
Q52L14	bap1	Ubiquitin carboxyl-terminal hydrolase BAP1 (EC 3.4.19.12) (BRCA1-associated protein 1)	Danio rerio
Q52L24	LOC733209	LOC733209 protein (Fragment)	Xenopus laevis
Q52L26	LOC733208	LOC733208 protein (Fragment)	Xenopus laevis
Q52L44	pccb	MGC68650 protein	Xenopus laevis
Q537I0	hnrnpd	AUF1 (Heterogeneous nuclear ribonucleoprotein D)	Xenopus laevis
Q561M0	scyl1	N-terminal kinase-like protein (SCY1-like protein 1)	Xenopus laevis
Q566F0	LOC733197	Pentaxin (Pentraxin) (Fragment)	Xenopus laevis
Q566F9	krt13	MGC84388 protein	Xenopus laevis
Q566H2	syn2	MGC115109 protein	Xenopus laevis
Q566I3	hyou1	Hypoxia up-regulated protein 1 (Fragment)	Xenopus laevis
Q566K4	larp1	MGC98945 protein	Xenopus laevis
Q566K8	nova2	Neuro-oncological ventral antigen 2	Xenopus laevis
Q566L1	slc25a11	MGC97830 protein	Xenopus laevis
Q566L7	lsm14b	Protein LSM14 homolog B (Protein FAM61B homolog) (RNA-associated protein 55B) (RAP55B)	Xenopus laevis
Q566M5	rbm39	RNA binding motif protein 39 (RNA-binding region (RNP1, RRM) containing 2)	Xenopus laevis
Q59GY4	NFYC	Nuclear transcription factor Y subunit gamma (CAAT box DNA-binding protein subunit C) (Nuclear transcription factor Y subunit C) (NF-YC) (Transactivator HSM-1/2)	Homo sapiens
Q5BIY1	rab11fip2	MGC84975 protein	Xenopus laevis
Q5EAT1	pcca	Pcca protein	Xenopus tropicalis
Q5EAT3	LOC733171	LOC733171 protein (Fragment)	Xenopus tropicalis
Q5EBE0	scp2	MGC108409 protein	Xenopus laevis
Q5EBG3	farsb	Phenylalanine tRNA synthetase like beta subunit	Xenopus laevis
Q5EE04	tpr	Nucleoprotein TPR (NPC-associated intranuclear protein) (Translocated promoter region and nuclear basket protein) (Fragment)	Xenopus laevis
Q5FW38	nfil3	Nuclear factor interleukin-3-regulated protein	Xenopus laevis
Q5FW42	dctn2	Dynactin subunit 2	Xenopus laevis
Q5FWN5	msh6	MGC85188 protein	Xenopus laevis
Q5FWP3	LOC733160	LOC733160 protein (Fragment)	Xenopus laevis
Q5FWV2	clint1	MGC97891 protein	Xenopus laevis
Q5HZ70	txnl1	MGC85151 protein	Xenopus laevis
Q5HZ78	drap1	MGC85186 protein	Xenopus laevis
Q5HZN1	kdm3a-b	Lysine-specific demethylase 3A-B (EC 1.14.11.-) (JmjC domain-containing histone demethylation protein 2A) (Jumonji domain-containing protein 1A-B)	Xenopus laevis
Q5HZP4	ppp1r13b	LOC496341 protein	Xenopus laevis
Q5I002	LOC496304	LOC496304 protein	Xenopus laevis
Q5I015	LOC496299	LOC496299 protein	Xenopus laevis
Q5I032	mrpl17	Mitochondrial ribosomal protein L17	Xenopus laevis
Q5I0B8	pir	Pirin	Gallus gallus
Q5KTT8	NAT1	eIF4G-related protein NAT1	Mus musculus
Q5M7A9	MGC81803	MGC81803 protein	Xenopus laevis
Q5M7D6	ppp4r2-a	Serine/threonine-protein phosphatase 4 regulatory subunit 2-A	Xenopus laevis
Q5M7M2	ivd	Isovaleryl Coenzyme A dehydrogenase	Xenopus laevis
Q5M7S8	gipc1	GIPC PDZ domain containing family, member 1 (GIPC PDZ domain-containing family member 1)	Xenopus laevis
Q5M8Y6	eci1	Dodecenoyl-Coenzyme A delta isomerase (3,2 trans-enoyl-Coenzyme A isomerase) (Enoyl-CoA delta isomerase 1)	Xenopus laevis
Q5M982	cbx8	LOC496172 protein	Xenopus tropicalis
Q5M9B4	pqbp1	LOC496143 protein	Xenopus tropicalis
Q5MNU4	stau1	Staufen 1	Xenopus laevis
Q5PPL7	LOC495408	LOC495408 protein	Xenopus laevis
Q5PPV5	zc2hc1a	Zinc finger C2HC domain-containing protein 1A	Xenopus laevis
Q5PPZ5	bin3	Bridging integrator 3 homolog	Xenopus laevis
Q5PQ18	dach2	LOC496011 protein	Xenopus laevis
Q5PQ49	mgst3	LOC495981 protein	Xenopus laevis
Q5PQ53	pef1	Peflin (PEF protein with a long N-terminal hydrophobic domain) (Penta-EF hand domain-containing protein 1)	Xenopus laevis
Q5PQ69	usf2	LOC495964 protein	Xenopus laevis
Q5PQ87	gpd2	Glycerol-3-phosphate dehydrogenase (EC 1.1.5.3)	Xenopus laevis
Q5R507	CAPZB	F-actin-capping protein subunit beta (CapZ beta)	Xenopus laevis
Q5RJU0	snf8	Vacuolar-sorting protein SNF8 (ESCRT-II complex subunit VPS22)	Xenopus laevis
Q5S1W7		Prion protein (Fragment)	Xenopus laevis
Q5SQX6	Cyfip2	Cytoplasmic FMR1-interacting protein 2 (p53-inducible protein 121)	Xenopus laevis
Q5U247	exoc8	Exocyst complex component 8	Xenopus laevis
Q5U248	crebbp	LOC495689 protein	Xenopus laevis
Q5U379	smarcb1a	SWI/SNF-related matrix-associated actin-dependent regulator of chromatin subfamily B member 1-A	Xenopus laevis
Q5U492	LOC495514	LOC495514 protein (Fragment)	Xenopus laevis
Q5U4T1	apba2	LOC495441 protein	Xenopus tropicalis
Q5U4W7	LOC495416	LOC495416 protein (Fragment)	Xenopus laevis
Q5U511	vapb	LOC495400 protein	Xenopus laevis
Q5U577	eml1	LOC495344 protein	Xenopus laevis
Q5U592	olfm2	LOC495330 protein	Xenopus laevis
Q5U594	LOC398288	LOC398288 protein	Xenopus laevis
Q5U5A8	LOC495316	ATP-citrate synthase (EC 2.3.3.8) (ATP-citrate (pro-S-)-lyase) (Citrate cleavage enzyme)	Xenopus laevis
Q5U5C2	vars	LOC495303 protein	Xenopus laevis
Q5U5C5	prpf31	U4/U6 small nuclear ribonucleoprotein Prp31 (Pre-mRNA-processing factor 31)	Xenopus laevis
Q5W7F7	UBE3A	Ubiquitin ligase E3A isoform 1	Xenopus laevis
Q5XFZ7	rrp15	LOC495250 protein	Xenopus laevis
Q5XGC8	ywhab	14-3-3 protein beta/alpha	Xenopus laevis
Q5XGI4	glud1	Glutamate dehydrogenase	Xenopus laevis
Q5XGK8	LOC495278	LOC495278 protein	Xenopus laevis
Q5XGL2	LOC495195	LOC495195 protein (Fragment)	Xenopus laevis
Q5XGR3	ppib	Peptidyl-prolyl cis-trans isomerase (PPIase) (EC 5.2.1.8)	Xenopus laevis
Q5XGR9	nrip3	LOC495157 protein	Xenopus laevis
Q5XGS7	prpf4b	LOC495151 protein	Xenopus laevis
Q5XGT5	pde4a	Phosphodiesterase (EC 3.1.4.-)	Xenopus laevis
Q5XGX8	LOC495117	LOC495117 protein (Fragment)	Xenopus laevis
Q5XGY8	srsf9	LOC495254 protein	Xenopus laevis
Q5XGZ6	LOC495107	LOC495107 protein (Fragment)	Xenopus laevis
Q5XH69	LOC495053	LOC495053 protein (Fragment)	Xenopus laevis
Q5XH78	pcbp2	Pcbp2 protein	Xenopus laevis
Q5XHF7	ccdc9	LOC495013 protein	Xenopus tropicalis
Q5XHF9	slc20a2	Sodium-dependent phosphate transporter 2 (Solute carrier family 20 member 2)	Xenopus tropicalis
Q5XK87	LOC494849	LOC494849 protein	Xenopus laevis
Q5XK89	golga7	LOC494848 protein	Xenopus laevis
Q5ZLP8	IGF2BP3	Insulin-like growth factor 2 mRNA-binding protein 3 (IGF2 mRNA-binding protein 3) (IMP-3) (IGF-II mRNA-binding protein 3) (VICKZ family member 3)	Xenopus tropicalis
Q61466	Smarcd1	SWI/SNF-related matrix-associated actin-dependent regulator of chromatin subfamily D member 1 (60 kDa BRG-1/Brm-associated factor subunit A) (BRG1-associated factor 60A) (BAF60A) (Protein D15KZ1) (SWI/SNF complex 60 kDa subunit)	Xenopus laevis
Q63ZH6	dbn1	LOC494829 protein	Xenopus laevis
Q63ZJ3	scgn	Secretagogin	Xenopus laevis
Q63ZN2	vps13a	LOC445856 protein	Xenopus laevis
Q63ZR0	magt1	Magnesium transporter protein 1 (MagT1)	Xenopus laevis
Q63ZU6	LOC494731	LOC494731 protein (Fragment)	Xenopus laevis
Q640A7	gpi	Glucose-6-phosphate isomerase (EC 5.3.1.9)	Xenopus laevis
Q640C3	umps	LOC494728 protein	Xenopus laevis
Q640G4	LOC398505	LOC398505 protein (Fragment)	Xenopus laevis
Q640H5	idh1	Isocitrate dehydrogenase [NADP] (EC 1.1.1.42)	Xenopus laevis
Q640K5	LOC494651	LOC494651 protein	Xenopus laevis
Q640W5	rpe	Ribulose-phosphate 3-epimerase (EC 5.1.3.1)	Xenopus laevis
Q640X7	capns1	MGC84330 protein	Xenopus laevis
Q640X9	cplx1	MGC84299 protein	Xenopus laevis
Q640Y4	MGC84250	Phosphoglycerate mutase (EC 5.4.2.11) (EC 5.4.2.4)	Xenopus laevis
Q640Y5	MGC84248	MGC84248 protein	Xenopus laevis
Q641E8	snrpa1	MGC81833 protein	Xenopus laevis
Q641H0	anxa11	Annexin	Xenopus laevis
Q642N9	tars	MGC86352 protein	Xenopus laevis
Q642R1	olfm3	MGC83418 protein	Xenopus laevis
Q642S4	golga2	MGC81213 protein	Xenopus laevis
Q64F50		Merlin	Xenopus laevis
Q66IJ0	nup35	Nucleoporin NUP53 (35 kDa nucleoporin) (Nuclear pore complex protein Nup53) (Nucleoporin Nup35)	Xenopus laevis
Q66IP1	ahcyl1	Adenosylhomocysteinase (EC 3.3.1.1)	Xenopus laevis
Q66IP8	scd	MGC86272 protein	Xenopus laevis
Q66IR5	nelfa	MGC85474 protein	Xenopus laevis
Q66IV7	cygb	Cytoglobin (MGC84306 protein)	Xenopus laevis
Q66J08	LOC446934	Anion exchange protein (Fragment)	Xenopus laevis
Q66J22	timm44	Mitochondrial import inner membrane translocase subunit TIM44	Xenopus laevis
Q66J33	ak1	Adenylate kinase isoenzyme 1 (AK 1) (EC 2.7.4.3) (EC 2.7.4.6) (ATP-AMP transphosphorylase 1) (ATP:AMP phosphotransferase) (Adenylate monophosphate kinase) (Myokinase)	Xenopus laevis
Q66J66	dhrs12	MGC81751 protein	Xenopus laevis
Q66J68	ccdc94	MGC81739 protein	Xenopus laevis
Q66J89	ythdf3	MGC81605 protein	Xenopus laevis
Q66J93	jpt2	MGC81578 protein	Xenopus laevis
Q66JA0	strn	MGC81438 protein	Xenopus laevis
Q66JA7	pdha1	Pyruvate dehydrogenase E1 component subunit alpha (EC 1.2.4.1)	Xenopus laevis
Q66KG8	crkl	MGC84382 protein	Xenopus laevis
Q66KH1	qpct	MGC84238 protein	Xenopus laevis
Q66KI5	dgke	Diacylglycerol kinase (DAG kinase) (EC 2.7.1.107)	Xenopus laevis
Q66KI6	pum1	Pumilio homolog 1 (Pumilio-1) (XPum)	Xenopus laevis
Q66L00	pmp2	MGC85281 protein	Xenopus laevis
Q66L03	ndufs7	MGC85267 protein	Xenopus laevis
Q66L32	timm8a	Mitochondrial import inner membrane translocase subunit Tim8 A	Xenopus laevis
Q68EQ3	shmt2	Serine hydroxymethyltransferase (EC 2.1.2.1)	Xenopus laevis
Q68ER1	cct8	Cct8 protein	Danio rerio
Q68EW4	rwdd1	MGC84211 protein	Xenopus tropicalis
Q68EX1	ahcyl2	Adenosylhomocysteinase (EC 3.3.1.1)	Xenopus tropicalis
Q68FJ1	atp5j	ATP synthase-coupling factor 6, mitochondrial (ATPase subunit F6)	Xenopus laevis
Q69D48	rhbg-a	Ammonium transporter Rh type B-A (Rhesus blood group family type B glycoprotein A) (Rh family type B glycoprotein A) (Rh type B glycoprotein A)	Xenopus laevis
Q6AX08	MGC86495	MGC86495 protein	Xenopus laevis
Q6AX47	arhgef2	LOC398353 protein	Xenopus laevis
Q6AX82	ndfip2	MGC82096 protein	Xenopus laevis
Q6AX83	lars	MGC82093 protein	Xenopus laevis
Q6AX99	hmgcs1	3-hydroxy-3-methylglutaryl coenzyme A synthase (HMG-CoA synthase) (EC 2.3.3.10)	Xenopus tropicalis
Q6AXA6	sept8-a	Septin-8-A	Xenopus tropicalis
Q6AXA8	efcab14	MGC80252 protein	Xenopus tropicalis
Q6AZF8	hmg20a	High mobility group protein 20A (HMG box-containing protein 20A)	Xenopus tropicalis
Q6AZH2	SIPA1L1	SIPA1L1 protein (Fragment)	Xenopus tropicalis
Q6AZN6	pik3c3	Phosphatidylinositol 3-kinase catalytic subunit type 3 (PI3-kinase type 3) (PI3K type 3) (PtdIns-3-kinase type 3) (EC 2.7.1.137) (Phosphoinositide-3-kinase class 3)	Xenopus tropicalis
Q6AZS8	gng4	Guanine nucleotide-binding protein subunit gamma	Xenopus tropicalis
Q6DCG2	HBXAP	HBXAP protein (Fragment)	Xenopus tropicalis
Q6DCK0	stip1	Stip1-prov protein	Xenopus tropicalis
Q6DCK8	Rnf36	Rnf36 protein (Fragment)	Xenopus laevis
Q6DCL1	bpnt1	MGC82412 protein	Xenopus laevis
Q6DCP1	foxred1	FAD-dependent oxidoreductase domain-containing protein 1 (EC 1.-.-.-)	Xenopus laevis
Q6DCQ0	ppp4r2-b	Serine/threonine-protein phosphatase 4 regulatory subunit 2-B	Xenopus laevis
Q6DCZ5	zc3h7b	MGC80522 protein	Xenopus laevis
Q6DD52	chmp5	Charged multivesicular body protein 5 (Chromatin-modifying protein 5)	Xenopus laevis
Q6DD57	hnrnph1	Hnrph2 protein (Hnrph2-prov protein)	Xenopus laevis
Q6DD69	pfkm	ATP-dependent 6-phosphofructokinase (ATP-PFK) (Phosphofructokinase) (EC 2.7.1.11) (Phosphohexokinase)	Danio rerio
Q6DD76	spats2	Spats2-prov protein	Xenopus laevis
Q6DD79	ppfibp1	LOC398525 protein	Xenopus tropicalis
Q6DDG7	ppme1	Protein phosphatase methylesterase 1 (PME-1) (EC 3.1.1.-)	Xenopus tropicalis
Q6DDG8	sec22a	Sec22l2-prov protein	Xenopus laevis
Q6DDI3	cd151	Tetraspanin	Xenopus laevis
Q6DDS4	LOC445859	LOC445859 protein	Xenopus laevis
Q6DDT8	POLD3	POLD3 protein (Fragment)	Xenopus laevis
Q6DDV6	rph3a	Rph3a-prov protein	Xenopus laevis
Q6DDZ1	dapk1	Dapk1-prov protein	Xenopus laevis
Q6DDZ4	rbm14	LOC398498 protein	Xenopus laevis
Q6DE60	cap1	Adenylyl cyclase-associated protein	Xenopus laevis
Q6DE94	ncbp3	Nuclear cap-binding protein subunit 3	Xenopus laevis
Q6DE96	iws1-a	Protein IWS1 homolog A (IWS1-like protein A)	Xenopus laevis
Q6DEA1	gars	Gars-prov protein	Xenopus laevis
Q6DEH3	camk2d1	Calcium/calmodulin-dependent protein kinase type II delta 1 chain (EC 2.7.11.17) (Calcium/calmodulin-dependent protein kinase type II delta-B chain) (CaM kinase II subunit delta-B) (CaM-kinase II delta-B chain) (CaMK-II subunit delta-B)	Xenopus laevis
Q6DEZ4	hdlbp	High density lipoprotein binding protein (Vigilin)	Xenopus laevis
Q6DEZ6	mad1l1	MAD1 mitotic arrest deficient-like 1 (Yeast)	Xenopus laevis
Q6DF78	pdxdc1	Pyridoxal-dependent decarboxylase domain-containing protein 1 (EC 4.1.1.-)	Xenopus laevis
Q6DFB5	agps	Alkylglycerone-phosphate synthase (Alkyl-DHAP synthase) (EC 2.5.1.26)	Xenopus laevis
Q6DFB6	LOC445831	LOC445831 protein (Fragment)	Xenopus laevis
Q6DFF2	brd4-b	Bromodomain-containing protein 4B	Xenopus laevis
Q6DFJ8	lnpk	Endoplasmic reticulum junction formation protein lunapark (ER junction formation factor lunapark)	Xenopus laevis
Q6DFM0	smarca5	ISWI protein	Xenopus laevis
Q6DFQ1	gpd1	Glycerol-3-phosphate dehydrogenase [NAD(+)] (EC 1.1.1.8)	Xenopus laevis
Q6DFR6	gpm6b	Glycoprotein M6B (MGC79599 protein)	Xenopus laevis
Q6DIP5	eml4	Echinoderm microtubule-associated protein-like 4 (EMAP-4)	Xenopus laevis
Q6DIT8	sbds	Ribosome maturation protein SBDS (Shwachman-Bodian-Diamond syndrome protein homolog)	Xenopus laevis
Q6DIZ7	mccc1	Methylcrotonoyl-Coenzyme A carboxylase 1 (Alpha)	Xenopus laevis
Q6DJ12	dars	Aspartyl-tRNA synthetase	Xenopus laevis
Q6DJ53	scmh1	Sex comb on midleg homolog 1	Xenopus laevis
Q6DJB6	app	Amyloid beta (A4) protein (Amyloid beta precursor protein)	Xenopus laevis
Q6DJC4	apoe	Apoe protein (Fragment)	Xenopus laevis
Q6DJE0	sec23b	MGC84454 protein	Xenopus laevis
Q6DJE3	tox2	MGC84449 protein	Xenopus laevis
Q6DJP5	MGC81882	MGC81882 protein	Xenopus laevis
Q6DKB2	ptgds	MGC84695 protein	Xenopus laevis
Q6DKC6	ddx42	MGC84147 protein	Xenopus laevis
Q6DKM6	tbca	Tubulin-specific chaperone A	Xenopus laevis
Q6DRI1	eif3ea	Eukaryotic translation initiation factor 3 subunit E-A (eIF3e-A) (Eukaryotic translation initiation factor 3 subunit 6-A)	Xenopus laevis
Q6EE55		Chaperonin subunit 8 theta (Fragment)	Xenopus laevis
Q6GLF0	idh2	Isocitrate dehydrogenase [NADP] (EC 1.1.1.42)	Xenopus laevis
Q6GLG0	echs1	Enoyl Coenzyme A hydratase, short chain, 1, mitochondrial	Xenopus laevis
Q6GLN7	tmem163	Transmembrane protein 163	Xenopus laevis
Q6GLQ9	aplp2	Aplp2 B protein	Xenopus laevis
Q6GLR7	cadps	Calcium-dependent secretion activator 1 (Calcium-dependent activator protein for secretion 1) (CAPS-1)	Xenopus laevis
Q6GLS4	camkv	CaM kinase-like vesicle-associated protein	Xenopus laevis
Q6GLT8	fahd2	Fumarylacetoacetate hydrolase domain-containing protein 2 (EC 3.-.-.-)	Xenopus laevis
Q6GLU2	pcdh8	MGC84237 protein	Xenopus laevis
Q6GLU8	phactr1	Phosphatase and actin regulator 1	Xenopus laevis
Q6GM06	otud6b	OTU domain-containing protein 6B (EC 3.4.19.12)	Xenopus laevis
Q6GM14	dbnl-b	Drebrin-like protein B	Xenopus laevis
Q6GM20	pcsk2	MGC84034 protein	Xenopus laevis
Q6GM25	kcnip1	MGC84022 protein	Xenopus laevis
Q6GM29	sacm1l	Phosphatidylinositide phosphatase SAC1 (EC 3.1.3.-) (Suppressor of actin mutations 1-like protein)	Xenopus laevis
Q6GM65	plaa	Phospholipase A-2-activating protein (PLA2P) (PLAP)	Xenopus laevis
Q6GM66	vps72	MGC83390 protein	Xenopus laevis
Q6GMC9	gmpr2	GMP reductase (GMPR) (EC 1.7.1.7) (Guanosine 5'-monophosphate oxidoreductase) (Guanosine monophosphate reductase)	Xenopus laevis
Q6GME7	dnajc11	MGC81794 protein	Xenopus laevis
Q6GN21	nr2c1-a	Nuclear receptor subfamily 2 group C member 1-A (Developmental orphan receptor 2-A) (DOR2-A) (xDOR2-A) (Orphan nuclear receptor TR2-A) (Testicular receptor 2-A)	Xenopus laevis
Q6GN51	arhgef7	MGC83025 protein	Xenopus laevis
Q6GN76	aass	MGC82978 protein	Xenopus laevis
Q6GNG3	tmx3	Protein disulfide-isomerase TMX3 (EC 5.3.4.1) (Thioredoxin domain-containing protein 10) (Thioredoxin-related transmembrane protein 3)	Xenopus laevis
Q6GNM7	dhx8	MGC80994 protein	Xenopus laevis
Q6GNM8	MGC80993	MGC80993 protein	Xenopus laevis
Q6GNQ4	gkap1-a	G kinase-anchoring protein 1-A	Xenopus laevis
Q6GNS5	fgfr3	Fibroblast growth factor receptor (EC 2.7.10.1)	Xenopus laevis
Q6GNT0	anxa6	Annexin	Xenopus laevis
Q6GNX2	LOC398688	Oxysterol-binding protein	Xenopus laevis
Q6GP36	sptlc2	MGC80715 protein	Xenopus laevis
Q6GP80	nop16	Nucleolar protein 16	Xenopus laevis
Q6GP90	dmtn	MGC80597 protein	Xenopus laevis
Q6GPA5	ttyh3	Protein tweety homolog 3	Xenopus laevis
Q6GPF6	hmox2	MGC80397 protein	Xenopus laevis
Q6GPK8	LOC443626	LOC443626 protein (Fragment)	Xenopus laevis
Q6GPK9	taok2	Serine/threonine-protein kinase TAO2 (EC 2.7.11.1) (Thousand and one amino acid protein 2)	Xenopus laevis
Q6GPL1	atxn3	MGC83584 protein	Xenopus laevis
Q6GPS9	hadha	MGC82638 protein	Xenopus laevis
Q6GPY0	timm13-a	Mitochondrial import inner membrane translocase subunit Tim13-A	Xenopus laevis
Q6GPY3	prdx5	MGC82521 protein (Peroxiredoxin 5)	Xenopus laevis
Q6GQ26	srebf2	Sterol regulatory element-binding protein 2 (SREBP-2) (Sterol regulatory element-binding transcription factor 2) [Cleaved into: Processed sterol regulatory element-binding protein 2]	Xenopus laevis
Q6GQ32	rnpep	MGC80387 protein	Xenopus laevis
Q6GQ65	ahsa1	MGC80312 protein	Xenopus laevis
Q6GQA2	LOC443585	LOC443585 protein (Fragment)	Xenopus laevis
Q6GQB7	psmc5	MGC80185 protein	Xenopus laevis
Q6GQE0	LOC443583	LOC443583 protein (Fragment)	Xenopus laevis
Q6GQZ3	tpp2	MGC83244 protein	Xenopus laevis
Q6GR07	xrcc4	MGC81443 protein	Xenopus laevis
Q6GR21	miga2	Mitoguardin 2 (Protein FAM73B)	Xenopus laevis
Q6GR42	gtf2h2	MGC81060 protein	Xenopus laevis
Q6GR43	emc4	ER membrane protein complex subunit 4 (Transmembrane protein 85)	Xenopus laevis
Q6GR46	cope	Coatomer subunit epsilon	Xenopus laevis
Q6I803	s100a11	Calcium-binding protein p26olf (LOC443554 protein)	Xenopus laevis
Q6IFY7	rtn1-a	Reticulon-1-A (RTN1.1) (xRTN1) (XRTN1-C.1)	Xenopus laevis
Q6INA9	setdb1	Histone-lysine N-methyltransferase SETDB1 (EC 2.1.1.43) (SET domain bifurcated 1)	Xenopus laevis
Q6INB4	bet1	MGC84493 protein	Xenopus laevis
Q6INB5	cntn4	MGC84491 protein	Xenopus laevis
Q6INB6	atp5c1	ATP synthase subunit gamma	Xenopus laevis
Q6INB7	dpp10	MGC84485 protein	Xenopus laevis
Q6INC8	slc17a7	Vesicular glutamate transporter 1 (VGluT1) (Solute carrier family 17 member 7)	Xenopus laevis
Q6ING0	LOC443576	LOC443576 protein (Fragment)	Xenopus laevis
Q6INP5	XenCK55(5/6)	XenCK55(5/6) protein	Xenopus laevis
Q6INR0	ddx47	MGC81303 protein	Xenopus laevis
Q6INS3	emc2-a	ER membrane protein complex subunit 2-A (Tetratricopeptide repeat protein 35-A) (TPR repeat protein 35-A)	Xenopus laevis
Q6INT7	mark1	Non-specific serine/threonine protein kinase (EC 2.7.11.1)	Xenopus laevis
Q6INV7	LOC432204	LOC432204 protein (Fragment)	Xenopus laevis
Q6INV9	MGC80198	Alpha-1,4 glucan phosphorylase (EC 2.4.1.1)	Xenopus laevis
Q6INW7	ttc4	MGC80137 protein	Xenopus laevis
Q6IP12	spcs3	MGC79052 protein	Xenopus laevis
Q6IP15	idh3b	Isocitrate dehydrogenase [NAD] subunit, mitochondrial	Xenopus laevis
Q6IP18	rpa2-a	Replication protein A 32 kDa subunit-A (RP-A p32) (Replication factor A protein 2) (RF-A protein 2) (Replication protein A 34 kDa subunit) (RP-A p34)	Xenopus laevis
Q6IP50	ubxn1-a	UBX domain-containing protein 1-A (SAPK substrate protein 1-A)	Xenopus laevis
Q6IP78	LOC432230	LOC432230 protein (Fragment)	Xenopus laevis
Q6IP90	LOC432146	LOC432146 protein (Fragment)	Xenopus laevis
Q6IR70	ppp1r21	Protein phosphatase 1 regulatory subunit 21 (Coiled-coil domain-containing protein 128) (KLRAQ motif-containing protein 1)	Xenopus laevis
Q6IR92	PREP	PREP protein (Fragment)	Xenopus laevis
Q6IRM7	anks1a	MGC83933 protein	Xenopus laevis
Q6IRP6	nudc	MGC83068 protein	Xenopus laevis
Q6IRQ2	nxf1	MGC82224 protein	Xenopus laevis
Q6IRR1	stam	MGC81342 protein	Xenopus tropicalis
Q6IU13	nek7	NIMA-family kinase Nek7 (Nek7 protein)	Xenopus tropicalis
Q6NRB9	emc1	ER membrane protein complex subunit 1	Xenopus tropicalis
Q6NRF2	LOC431899	LOC431899 protein (Fragment)	Xenopus tropicalis
Q6NRL7	fkbp4	Peptidylprolyl isomerase (EC 5.2.1.8)	Xenopus tropicalis
Q6NRM3	psip1	LOC398545 protein	Xenopus tropicalis
Q6NRN1	LOC431973	LOC431973 protein (Fragment)	Xenopus laevis
Q6NRP6	tdrd3	Tudor domain-containing protein 3	Homo sapiens
Q6NRR9	LOC431982	LOC431982 protein (Fragment)	Xenopus tropicalis
Q6NRV7	nsd2	MGC81292 protein	Xenopus tropicalis
Q6NRW1	ccdc50	LOC100049085 protein	Xenopus tropicalis
Q6NRW2	spdl1-b	Protein Spindly-B (Coiled-coil domain-containing protein 99-B) (Spindle apparatus coiled-coil domain-containing protein 1-B)	Xenopus tropicalis
Q6NRY2	nol6	Nucleolar protein 6	Xenopus laevis
Q6NS23	trmt11	tRNA (guanine(10)-N2)-methyltransferase homolog (EC 2.1.1.-) (tRNA guanosine-2'-O-methyltransferase TRM11 homolog)	Xenopus laevis
Q6NTN5	sbf2	Myotubularin-related protein 13 (SET-binding factor 2)	Xenopus tropicalis
Q6NTP1	LOC414597	LOC414597 protein (Fragment)	Xenopus tropicalis
Q6NTQ5	tcp1	Tcp1-A-prov protein	Xenopus tropicalis
Q6NTU1	mrps26	MGC82245 protein	Xenopus tropicalis
Q6NTU8	grhpr.1	MGC82214 protein	Xenopus tropicalis
Q6NTW2	nucb1	MGC81496 protein	Xenopus laevis
Q6NTW6	nae1	NEDD8-activating enzyme E1 regulatory subunit (APP-BP1) (Amyloid protein-binding protein 1)	Xenopus laevis
Q6NTY5	zcchc9	MGC81425 protein	Xenopus tropicalis
Q6NTY7	utp14a	LOC398529 protein	Xenopus tropicalis
Q6NU25	arhgap35	MGC81300 protein	Xenopus tropicalis
Q6NU35	dhx15	MGC81281 protein	Xenopus laevis
Q6NU65	rnaseh1	Ribonuclease H1 (RNase H1) (EC 3.1.26.4)	Xenopus laevis
Q6NU70	pcbd2	MGC81188 protein	Xenopus laevis
Q6NUC6	rc3h1	Roquin-1 (RING finger and C3H zinc finger protein 1) (RING finger and CCCH-type zinc finger domain-containing protein 1)	Xenopus laevis
Q6NVP8	fut8	Alpha-(1,6)-fucosyltransferase (Alpha1-6FucT) (EC 2.4.1.68) (GDP-L-Fuc:N-acetyl-beta-D-glucosaminide alpha1,6-fucosyltransferase) (GDP-fucose--glycoprotein fucosyltransferase) (Glycoprotein 6-alpha-L-fucosyltransferase)	Xenopus laevis
Q6NVR6	krt8	Keratin 8	Xenopus laevis
Q6NVU3	hspa9	Heat shock 70kDa protein 9 (Mortalin) (Heat shock 70kDa protein 9A)	Xenopus laevis
Q6NZH7	nono	Non-POU domain containing, octamer-binding	Xenopus laevis
Q6P1S4	rars	Arginine--tRNA ligase, cytoplasmic (EC 6.1.1.19) (Arginyl-tRNA synthetase) (ArgRS)	Xenopus laevis
Q6P1T9	coro1c	Coronin	Xenopus tropicalis
Q6P2Q9	PRPF8	Pre-mRNA-processing-splicing factor 8 (220 kDa U5 snRNP-specific protein) (PRP8 homolog) (Splicing factor Prp8) (p220)	Xenopus laevis
Q6P2Z8	tsg101	Tumor susceptibility gene 101	Xenopus laevis
Q6P3P9	smg7	SMG7 nonsense mediated mRNA decay factor (Smg-7 homolog, nonsense mediated mRNA decay factor (C. elegans))	Xenopus laevis
Q6P428	LOC399077	LOC399077 protein (Fragment)	Xenopus laevis
Q6P429	nrip1	MGC68665 protein	Xenopus laevis
Q6P4J2	copg1	Coatomer subunit gamma	Xenopus laevis
Q6P4L2	txndc5	Thioredoxin domain-containing 5	Xenopus laevis
Q6P4L3	rbm4b	RNA binding motif protein 4 [ (RNA-binding motif protein 4B)	Xenopus laevis
Q6P4Z5	ywhaz	14-3-3 protein zeta	Xenopus laevis
Q6P6Z8	ogdh	2-oxoglutarate dehydrogenase, mitochondrial (EC 1.2.4.2) (2-oxoglutarate dehydrogenase complex component E1) (OGDC-E1) (Alpha-ketoglutarate dehydrogenase)	Danio rerio
Q6P7H4	zc3hc1	NIPA-like protein (Zinc finger C3HC-type protein 1-like)	Xenopus laevis
Q6P895	pitpnb	Phosphatidylinositol transfer protein, beta	Xenopus laevis
Q6P8B9	hadhb	Hydroxyacyl-CoA dehydrogenase trifunctional multienzyme complex subunit beta (Hydroxyacyl-Coenzyme A dehydrogenase/3-ketoacyl-Coenzyme A thiolase/enoyl-Coenzyme A hydratase (Trifunctional protein), beta subunit)	Danio rerio
Q6P8D7	atp6v1e1	ATPase, H+ transporting, lysosomal 31kDa, V1 subunit E	Homo sapiens
Q6P9I3	appl1	MGC68986 protein	Homo sapiens
Q6PA46	polr2b	MGC68569 protein	Xenopus laevis
Q6PA55	epb41l3	MGC68473 protein	Danio rerio
Q6PAA3	elmo1	MGC68475 protein	Danio rerio
Q6PAF7		Uncharacterized protein	Xenopus laevis
Q6PAY1	nup54	MGC68541 protein	Xenopus laevis
Q6PAY8	hsdl2	Hydroxysteroid dehydrogenase-like protein 2 (EC 1.-.-.-)	Xenopus laevis
Q6PB25	pgd	6-phosphogluconate dehydrogenase, decarboxylating (EC 1.1.1.44)	Xenopus laevis
Q6PBE2	bcas2	Pre-mRNA-splicing factor SPF27 (Protein BCAS2 homolog)	Xenopus laevis
Q6PCF1	slc25a13	MGC69168 protein	Xenopus laevis
Q6PCH5	LOC398738	LOC398738 protein (Fragment)	Xenopus laevis
Q6PCI8	pc.1	Pyruvate carboxylase (EC 6.4.1.1)	Xenopus laevis
Q6PCK5	rbm12	Rbm12-prov protein	Xenopus laevis
Q6PF26	qars	MGC69128 protein	Xenopus laevis
Q6PF79	ctcf	Ctcf protein	Xenopus laevis
Q6PGS7	c1qbp	LOC398432 protein	Xenopus laevis
Q6PGT0	tada3-a	Transcriptional adapter 3-A (ADA3 homolog A) (Transcriptional adapter 3-like A) (ADA3-like protein A)	Xenopus laevis
Q6PH25	vps28	Vacuolar protein sorting-associated protein 28 homolog	Xenopus laevis
Q6PH93	LOC398726	LOC398726 protein (Fragment)	Xenopus laevis
Q6Q4H9	eif2s2	Eukaryote initiation factor 2 beta (MGC130959 protein)	Xenopus laevis
Q6TH20	drg2	Developmentally-regulated GTP-binding protein 2 (Drg2 protein)	Danio rerio
Q7L099	RUFY3	Protein RUFY3 (RUN and FYVE domain-containing protein 3) (Rap2-interacting protein x) (RIPx) (Single axon-regulated protein) (Singar)	Xenopus laevis
Q7L7X3	TAOK1	Serine/threonine-protein kinase TAO1 (EC 2.7.11.1) (Kinase from chicken homolog B) (hKFC-B) (MARK Kinase) (MARKK) (Prostate-derived sterile 20-like kinase 2) (PSK-2) (PSK2) (Prostate-derived STE20-like kinase 2) (Thousand and one amino acid protein kinase 1) (TAOK1) (hTAOK1)	Xenopus laevis
Q7SXA5		Ferritin light chain, oocyte isoform (B-ferritin) (GV-LCH) (XeBF)	Xenopus laevis
Q7SXW4	emc3	ER membrane protein complex subunit 3 (Protein pob) (Transmembrane protein 111)	Xenopus laevis
Q7SY59	rap2b	RAP2B, member of RAS oncogene family (Rap2b protein)	Xenopus laevis
Q7SY62	snx2	Snx2-prov protein	Xenopus laevis
Q7SY95	cd63	Tetraspanin	Xenopus laevis
Q7SYQ5		Stom-prov protein	Xenopus laevis
Q7SYR7	LOC398643	LOC398643 protein (Fragment)	Xenopus laevis
Q7SYV0	farsa-b	Phenylalanine--tRNA ligase alpha subunit B (EC 6.1.1.20) (Phenylalanyl-tRNA synthetase alpha subunit B) (PheRS)	Xenopus laevis
Q7SYW7	lamtor1	Ragulator complex protein LAMTOR1 (Late endosomal/lysosomal adaptor and MAPK and MTOR activator 1)	Xenopus laevis
Q7SYX5	apob	MGC64418 protein	Xenopus laevis
Q7SZ16		MGC64308 protein	Xenopus laevis
Q7SZ17	MGC64305	MGC64305 protein	Xenopus laevis
Q7SZ42	hmgb1	Hmgb1-prov protein	Xenopus laevis
Q7SZ66		Uncharacterized protein (Fragment)	Xenopus laevis
Q7SZ74	LOC398644	LOC398644 protein (Fragment)	Xenopus laevis
Q7T0U7	LOC398693	LOC398693 protein (Fragment)	Xenopus laevis
Q7T0W7	hm13	H13-prov protein	Xenopus laevis
Q7T3D4	cdc73	Cdc73 protein (Cell division cycle 73, Paf1/RNA polymerase II complex component, homolog (S. cerevisiae)) (Vcell division cycle 73, Paf1/RNA polymerase II complex component, homolog (S. cerevisiae))	Xenopus laevis
Q7ZTI9	mmp7	MGC53510 protein	Xenopus laevis
Q7ZTJ5	P4hb	Protein disulfide-isomerase (EC 5.3.4.1) (Fragment)	Xenopus laevis
Q7ZTL1	acaa2	Acaa2-prov protein	Xenopus laevis
Q7ZTL6	scarb2	Cd36l2 protein	Xenopus laevis
Q7ZTM8	LOC398448	LOC398448 protein (Fragment)	Xenopus laevis
Q7ZTP7	dpysl4	MGC53768 protein	Xenopus laevis
Q7ZTR1	fga	Fga-prov protein	Xenopus laevis
Q7ZWJ1	SYNE1	SYNE1 protein (Fragment)	Xenopus laevis
Q7ZWL0	nup155	Nup155-prov protein	Xenopus laevis
Q7ZWN3	chd4	B230399n07 protein	Xenopus laevis
Q7ZWP8	top3b	DNA topoisomerase (EC 5.99.1.2)	Xenopus laevis
Q7ZWR2	cars	Cysteine--tRNA ligase, cytoplasmic (EC 6.1.1.16) (Cysteinyl-tRNA synthetase) (CysRS)	Xenopus laevis
Q7ZWV5	LOC398495	LOC398495 protein (Fragment)	Xenopus laevis
Q7ZWW5	abcf2	Abcf2-prov protein	Xenopus laevis
Q7ZX11	LOC398511	LOC398511 protein (Fragment)	Xenopus laevis
Q7ZX29	cyb5r3	NADH-cytochrome b5 reductase (EC 1.6.2.2)	Xenopus laevis
Q7ZX51	yars	Tyrosine--tRNA ligase, cytoplasmic (EC 6.1.1.1) (Tyrosyl-tRNA synthetase) (TyrRS)	Xenopus laevis
Q7ZX91	Ap1s1	AP complex subunit sigma (Fragment)	Xenopus laevis
Q7ZX96	nup93	Nuclear pore complex protein Nup93 (93 kDa nucleoporin) (An4a) (Nucleoporin Nup93)	Xenopus laevis
Q7ZXE8	ehd4	Ehd4 protein	Xenopus laevis
Q7ZXF5	far1	Fatty acyl-CoA reductase 1 (EC 1.2.1.84)	Xenopus laevis
Q7ZXQ0	MGC52816	MGC52816 protein	Xenopus laevis
Q7ZXR2		MGC53884 protein	Xenopus laevis
Q7ZXR5	Pa2g4	Pa2g4 protein (Fragment)	Xenopus laevis
Q7ZXT3	edc4	Enhancer of mRNA-decapping protein 4	Xenopus laevis
Q7ZXW3	naa10	Ard1-prov protein	Xenopus laevis
Q7ZXW6	cbs	Cystathionine beta-synthase (EC 4.2.1.22)	Xenopus laevis
Q7ZXY3	calr	Crc protein	Xenopus laevis
Q7ZY21	ckmt1b	MGC53985 protein	Xenopus laevis
Q7ZY35	llph	Protein LLP homolog (Protein LAPS18-like)	Xenopus laevis
Q7ZY73	ndrg2	Protein NDRG2	Xenopus laevis
Q7ZY80	dpp3-A-prov	Dpp3-A-prov protein (Fragment)	Xenopus laevis
Q7ZYA0	lmbrd2	LMBR1 domain-containing protein 2	Xenopus laevis
Q7ZYC1	sart1	MGC53679 protein	Xenopus laevis
Q7ZYD9	ankrd13c-b	Ankyrin repeat domain-containing protein 13C-B	Xenopus laevis
Q7ZYF0	hdac6	Histone deacetylase (EC 3.5.1.98)	Xenopus laevis
Q7ZYF5	cnn3	Calponin	Xenopus laevis
Q7ZYJ1	cdk17	Pctk2-prov protein	Xenopus laevis
Q7ZYJ9	aarsd1-b	Alanyl-tRNA editing protein Aarsd1-B (Alanyl-tRNA synthetase domain-containing protein 1-B)	Xenopus laevis
Q7ZYP0	ube2v2	Ubiquitin-conjugating enzyme E2 variant 2	Xenopus laevis
Q7ZYP6	mcmbp	Mini-chromosome maintenance complex-binding protein (MCM-BP) (MCM-binding protein)	Xenopus laevis
Q7ZYR5	arfgap3	Arfgap3-prov protein	Xenopus laevis
Q7ZYR8	rsrc2	Arginine/serine-rich coiled-coil protein 2	Rattus norvegicus
Q7ZZW0	LOC398596	Peptidyl-prolyl cis-trans isomerase (PPIase) (EC 5.2.1.8) (Fragment)	Xenopus laevis
Q800E5	nos1	Nitric oxide synthase (EC 1.14.13.39)	Xenopus laevis
Q801E4		Glutamate carboxypeptidase-like protein 1 (Fragment)	Xenopus laevis
Q801M7	kank2	Kiaa1518-prov protein	Xenopus laevis
Q801Q6	wdr36	MGC53182 protein	Xenopus laevis
Q802B5	col1a1	Col1a1 protein	Xenopus laevis
Q802B7	ndufs1	Ndufs1-prov protein	Xenopus laevis
Q802C0	utp6	MGC53963 protein	Xenopus laevis
Q80WA4	Nova1	RNA-binding protein Nova-1 (Neuro-oncological ventral antigen 1) (Fragment)	Xenopus laevis
Q8AVD3	ak2	Adenylate kinase 2, mitochondrial (AK 2) (EC 2.7.4.3) (ATP-AMP transphosphorylase 2) (ATP:AMP phosphotransferase) (Adenylate monophosphate kinase)	Xenopus laevis
Q8AVE7	gnl2	Nucleolar GTP-binding protein 2	Xenopus laevis
Q8AVG0	abr	Active breakpoint cluster region-related protein	Xenopus laevis
Q8AVL7	FKBP1B	Peptidylprolyl isomerase (EC 5.2.1.8) (Fragment)	Xenopus laevis
Q8AVM4	sh2d3c	Sh2d3c-prov protein	Xenopus laevis
Q8AVN6	canx	MGC52646 protein	Xenopus laevis
Q8AVN9	znf346	Zinc finger protein 346 (Double-stranded RNA-binding protein ZFa) (DsRBP-ZFa) (ZFa) (Just another zinc finger protein) (Protein jaz)	Xenopus laevis
Q8AVP2	camlg	Calcium signal-modulating cyclophilin ligand (CAML)	Xenopus laevis
Q8AVS8	lrrc59	Leucine-rich repeat-containing protein 59	Gallus gallus
Q8AVX4	ica1	Ica1-prov protein	Xenopus laevis
Q8AVX5	rp2	Protein XRP2	Homo sapiens
Q8AVY3	snap29	Snap29-prov protein	Xenopus laevis
Q8AYP2	MBD3	Methyl-CpG binding protein MBD3	Xenopus laevis
Q8AYP8	HK1	Hexokinase1	Xenopus laevis
Q8JIW9	sema3a	Semaphorin 3A	Xenopus laevis
Q8NHW5	RPLP0P6	60S acidic ribosomal protein P0-like (Large ribosomal subunit protein uL10-like)	Mus musculus
Q8QG78	ncor1	Nuclear receptor corepressor 1 (N-CoR) (N-CoR1) (xN-CoR)	Homo sapiens
Q8QGC4	pbx1	Pre-B-cell leukemia transcription factor 1 (Xpbx1) (Homeobox protein pbx1) (Pre-B-cell leukemia transcription factor 1b) (Xpbx1b)	Xenopus laevis
Q8UVY7	polr1a	DNA-directed RNA polymerase subunit (EC 2.7.7.6)	Xenopus laevis
Q8VCE0	Atp1a3	Sodium/potassium-transporting ATPase subunit alpha (EC 3.6.3.-)	Xenopus laevis
Q8WUN7	UBTD2	Ubiquitin domain-containing protein 2 (Dendritic cell-derived ubiquitin-like protein) (DC-UbP) (Ubiquitin-like protein SB72)	Xenopus laevis
Q91375	eef1g-b	Elongation factor 1-gamma-B (EF-1-gamma-B) (eEF-1B gamma-B) (p47)	Xenopus laevis
Q91586	abcb1	Multidrug resistance protein	Xenopus laevis
Q91590	tmeff1	Tomoregulin-1 (TR-1) (Transmembrane protein with EGF-like and one follistatin-like domain) (X7365)	Xenopus laevis
Q91593	kcnb1	Potassium channel alpha subunit Kv2.1	Xenopus laevis
Q91604	stk11	Serine/threonine-protein kinase stk11 (EC 2.7.11.1) (Liver kinase B1 homolog) (lkb1) (Serine/threonine-protein kinase XEEK1)	Xenopus laevis
Q91629	cacnb3	Voltage-dependent calcium channel beta subunit	Xenopus laevis
Q91636	kif2c	Kinesin-like protein KIF2C (Kinesin central motor 1) (xKCM1)	Xenopus laevis
Q91648	bmi1a	Polycomb complex protein BMI-1-A (Polycomb group RING finger protein 4-A)	Xenopus laevis
Q91730		DNA-binding protein	Xenopus laevis
Q91738	ptk2	Focal adhesion kinase 1 (FADK 1) (EC 2.7.10.2) (Protein-tyrosine kinase 2) (pp125FAK)	Xenopus laevis
Q91756	kbp	Glutamate receptor U1 (Kainate-binding protein) (Unitary non-NMDA glutamate receptor subunit 1) (XENU1)	Xenopus laevis
Q91784	kif4	Chromosome-associated kinesin KIF4 (Chromokinesin) (Chromosome-associated kinesin KLP1)	Xenopus laevis
Q91837	fscn	Fascin	Xenopus laevis
Q91850		Sodium-calcium exchanger (Fragment)	Xenopus laevis
Q91860	xTFIIS.oB	TFIIS elongation factor (XTFIIS.oB protein)	Xenopus laevis
Q91908	itpr1	Inositol 1,4,5-triphosphate receptor	Xenopus laevis
Q92122	pkm	Pyruvate kinase PKM (EC 2.7.1.40) (Cytosolic thyroid hormone-binding protein) (CTHBP)	Xenopus laevis
Q92128		Annexin (Fragment)	Xenopus laevis
Q92131	H2B	Histone H2B	Xenopus laevis
Q92139	PP2A	Phosphorylase phosphatase (EC 3.1.3.17)	Homo sapiens
Q92900	UPF1	Regulator of nonsense transcripts 1 (EC 3.6.4.-) (ATP-dependent helicase RENT1) (Nonsense mRNA reducing factor 1) (NORF1) (Up-frameshift suppressor 1 homolog) (hUpf1)	Gallus gallus
Q98TF6	RPL36	60S ribosomal protein L36	Xenopus laevis
Q98TI1	kif3a	Kinesin-like protein	Lithobates catesbeiana
Q98TT2		Calcium-transporting ATPase (EC 3.6.3.8)	Xenopus laevis
Q98UE5		Peptidyl-prolyl cis-trans isomerase (PPIase) (EC 5.2.1.8) (Fragment)	Homo sapiens
Q99877	HIST1H2BN	Histone H2B type 1-N (Histone H2B.d) (H2B/d)	Homo sapiens
Q9BT78	COPS4	COP9 signalosome complex subunit 4 (SGN4) (Signalosome subunit 4) (JAB1-containing signalosome subunit 4)	Xenopus laevis
Q9DDV7	ckap5	Microtubule associated protein XMAP215 isoform Z	Xenopus laevis
Q9DDY9	pabpn1-a	Polyadenylate-binding protein 2-A (PABP-2-A) (Poly(A)-binding protein 2-A) (Nuclear poly(A)-binding protein 1-A) (Poly(A)-binding protein II-A) (PABII-A) (Polyadenylate-binding nuclear protein 1-A) (XLnPABP2-A) (nPABP2-A) (xPABPII-A)	Xenopus laevis
Q9DF36	ddx21-b	Nucleolar RNA helicase 2-B (EC 3.6.4.13) (DEAD box protein 21-B) (Gu-alpha-B) (Nucleolar RNA helicase Gu-B) (xGu-2) (Nucleolar RNA helicase II-B) (RH II/Gu-B)	Xenopus laevis
Q9DGN0	stag2	Cohesin subunit SA-2 (xSA-2) (SCC3 homolog 2) (Stromal antigen 2 homolog)	Xenopus laevis
Q9DGN1	stag1	Cohesin subunit SA-1 (xSA-1) (SCC3 homolog 1) (Stromal antigen 1 homolog)	Xenopus laevis
Q9H4W6	EBF3	Transcription factor COE3 (Early B-cell factor 3) (EBF-3) (Olf-1/EBF-like 2) (O/E-2) (OE-2)	Homo sapiens
Q9HCK5	AGO4	Protein argonaute-4 (Argonaute4) (hAgo4) (Argonaute RISC catalytic component 4) (Eukaryotic translation initiation factor 2C 4) (eIF-2C 4) (eIF2C 4)	Homo sapiens
Q9IAB2	cbfa2t2	Protein CBFA2T2 (MTG8-like protein) (MTG8-related protein 1)	Xenopus laevis
Q9NUP9	LIN7C	Protein lin-7 homolog C (Lin-7C) (Mammalian lin-seven protein 3) (MALS-3) (Vertebrate lin-7 homolog 3) (Veli-3)	Homo sapiens
Q9NXR7	BABAM2	BRISC and BRCA1-A complex member 2 (BRCA1-A complex subunit BRE) (BRCA1/BRCA2-containing complex subunit 45) (Brain and reproductive organ-expressed protein)	Homo sapiens
Q9PRG7	p75NTRa	p75 neurotrophin receptor a-1 (p75 neurotrophin receptor a-2)	Xenopus laevis
Q9PTY0	atp5b	ATP synthase subunit beta, mitochondrial (EC 3.6.3.14)	Cyprinus carpio
Q9PUD3	syn3	Synapsin IIIa	Xenopus laevis
Q9PUM2	ptprt	Receptor protein tyrosine phosphatase rho (Fragment)	Xenopus laevis
Q9PVV4	pcm1	Pericentriolar material 1 protein (PCM-1) (xPCM-1)	Xenopus laevis
Q9PVZ2	nup214	Nucleoporin CAN	Xenopus laevis
Q9PW63		Desmoplakin-related protein (Fragment)	Xenopus laevis
Q9UL25	RAB21	Ras-related protein Rab-21	Homo sapiens
Q9UNS2	COPS3	COP9 signalosome complex subunit 3 (SGN3) (Signalosome subunit 3) (JAB1-containing signalosome subunit 3)	Homo sapiens
Q9UQE7	SMC3	Structural maintenance of chromosomes protein 3 (SMC protein 3) (SMC-3) (Basement membrane-associated chondroitin proteoglycan) (Bamacan) (Chondroitin sulfate proteoglycan 6) (Chromosome-associated polypeptide) (hCAP)	Homo sapiens
Q9W6C5	pdcd6ip	Programmed cell death 6-interacting protein (Signal transduction protein Xp95)	Xenopus laevis
Q9Y230	RUVBL2	RuvB-like 2 (EC 3.6.4.12) (48 kDa TATA box-binding protein-interacting protein) (48 kDa TBP-interacting protein) (51 kDa erythrocyte cytosolic protein) (ECP-51) (INO80 complex subunit J) (Repressing pontin 52) (Reptin 52) (TIP49b) (TIP60-associated protein 54-beta) (TAP54-beta)	Homo sapiens
Q9Y265	RUVBL1	RuvB-like 1 (EC 3.6.4.12) (49 kDa TATA box-binding protein-interacting protein) (49 kDa TBP-interacting protein) (54 kDa erythrocyte cytosolic protein) (ECP-54) (INO80 complex subunit H) (Nuclear matrix protein 238) (NMP 238) (Pontin 52) (TIP49a) (TIP60-associated protein 54-alpha) (TAP54-alpha)	Homo sapiens
Q9Y295	DRG1	Developmentally-regulated GTP-binding protein 1 (DRG-1) (Neural precursor cell expressed developmentally down-regulated protein 3) (NEDD-3)	Homo sapiens
Q9Y3I0	RTCB	tRNA-splicing ligase RtcB homolog (EC 6.5.1.3)	Homo sapiens
