# Supplementary material for: Role of the visual experience-dependent nascent proteome in neuronal plasticity
Source: eLife. 2018 Feb 7;7:e33420. doi: 10.7554/eLife.33420 (PMC5815848; doi:10.7554/eLife.33420)
Supplement: Supplementary file 9. — For each statistical test run in the study, the data structure, type of statistical test, sample size, p-value and power are listed. [file elife-33420-supp9.xlsx]

## Sheet: Sheet1
	Data structure	Type of test	Sample size	p-value	Power
Fig2B-CaMKIIa	Not normally distributed	Wilcoxon / Kruskal-Wallis tests	12	<.0001	0.791
Fig2B-Calmodulin	Not normally distributed	Wilcoxon / Kruskal-Wallis tests	9	0.0002	0.94
Fig2B-L1CAM	Not normally distributed	Wilcoxon / Kruskal-Wallis tests	6	1	0.2331
Fig2B-FUS	Not normally distributed	Wilcoxon / Kruskal-Wallis tests	4	0.0211	0.283
Fig2B-PSMD2	Not normally distributed	Wilcoxon / Kruskal-Wallis tests	6	0.0028	0.3073
Fig2B-RPS17	Not normally distributed	Wilcoxon / Kruskal-Wallis tests	6	0.0028	0.2835
Fig2C-CaMKIIa	Normally distributed	Two-tailed Student's t test	6	0.044	0.6753
Fig2C-Calmodulin	Normally distributed	Two-tailed Student's t test	7	0.7435	0.0615
Fig2C-L1CAM	Normally distributed	Two-tailed Student's t test	10	0.0046	0.942
Fig2C-eIF3A	Normally distributed	Two-tailed Student's t test	6	0.2119	0.2537
Fig2C-FUS	Normally distributed	Two-tailed Student's t test	5	0.1453	0.3563
Fig2C-PSMD2	Normally distributed	Two-tailed Student's t test	7	0.0904	0.458
Fig2C-RPS17	Normally distributed	Two-tailed Student's t test	13	0.1733	0.2847
Fig4C	Normally distributed	Two-tailed paired Student’s t test	14	<.0001
Fig4C'	Normally distributed	Two-tailed paired Student’s t test	9	0.7547
Fig4C''	Normally distributed	Two-tailed paired Student’s t test	10	0.0172
Fig4D	Normally distributed	Two-tailed paired Student’s t test	9	0.0038
Fig4D'	Normally distributed	Two-tailed paired Student’s t test	11	0.2822
Fig4D''	Normally distributed	Two-tailed paired Student’s t test	10	0.0031
Fig4E-fusa	Normally distributed	One-tailed Student's t test	4	0.0302	0.6906
Fig4F	Normally distributed	One-tailed Student's t test	5	0.0172	0.7888
Fig4G-gria1	Normally distributed	One-tailed Student's t test	4	0.0365	0.621
Fig4G-gria2	Normally distributed	One-tailed Student's t test	4	0.1642	0.1668
Fig5B	Normally distributed	Two-tailed paired Student’s t test	8	0.0003
Fig5B'	Normally distributed	Two-tailed paired Student’s t test	17	0.284
Fig5B''	Normally distributed	Two-tailed paired Student’s t test	10	0.2381
Fig5C	Normally distributed	Two-tailed paired Student’s t test	10	0.0093
Fig5C'	Normally distributed	Two-tailed paired Student’s t test	10	0.2775
Fig5C''	Normally distributed	Two-tailed paired Student’s t test	9	0.0451
Fig5D	Normally distributed	Two-tailed paired Student’s t test	10	0.042
Fig5D'	Normally distributed	Two-tailed paired Student’s t test	14	0.161
Fig5D''	Normally distributed	Two-tailed paired Student’s t test	7	0.0027
Fig5E	Normally distributed	One-tailed Student's t test	5	0.0003	1
Fig5F	Normally distributed	One-tailed Student's t test	3	0.0198	0.9458
Fig5G	Normally distributed	One-tailed Student's t test	4	0.0309	0.6816
Fig5H	Normally distributed	One-tailed Student's t test	7	0.0029	0.8718
Fig6B	Normally distributed	Two-tailed paired Student’s t test	9	0.0024
Fig6B'	Normally distributed	Two-tailed paired Student’s t test	11	0.5796
Fig6D	Normally distributed	Two-tailed paired Student’s t test	7	0.0225
Fig6D'	Normally distributed	Two-tailed paired Student’s t test	17	0.2222
Fig6E-EMO/CMO	Not normally distributed	Nonparametric comparisons with control using Steel-Dwass method	17/38	0.9929	0.458
Fig6E-RMO/CMO	Not normally distributed	Nonparametric comparisons with control using Steel-Dwass method	10/38	0.8454
Fig6E-FMO/CMO	Not normally distributed	Nonparametric comparisons with control using Steel-Dwass method	9/38	0.9922
Fig6E-EMO+RMO/CMO	Not normally distributed	Nonparametric comparisons with control using Steel-Dwass method	11/38	0.1204
Fig6E-EMO+RMO+FMO/CMO	Not normally distributed	Nonparametric comparisons with control using Steel-Dwass method	17/38	0.3183
Fig6F-EMO/CMO	Not normally distributed	Nonparametric comparisons with control using Steel-Dwass method	17/38	0.5109	0.9411
Fig6F-RMO/CMO	Not normally distributed	Nonparametric comparisons with control using Steel-Dwass method	10/38	0.2723
Fig6F-FMO/CMO	Not normally distributed	Nonparametric comparisons with control using Steel-Dwass method	9/38	0.3263
Fig6F-EMO+RMO/CMO	Not normally distributed	Nonparametric comparisons with control using Steel-Dwass method	11/38	0.0313
Fig6F-EMO+RMO+FMO/CMO	Not normally distributed	Nonparametric comparisons with control using Steel-Dwass method	17/38	<.0001
Fig6G-EMO/CMO	Not normally distributed	Nonparametric comparisons with control using Steel-Dwass method	17/38	0.935	0.9706
Fig6G-RMO/CMO	Not normally distributed	Nonparametric comparisons with control using Steel-Dwass method	10/38	0.9781
Fig6G-FMO/CMO	Not normally distributed	Nonparametric comparisons with control using Steel-Dwass method	9/38	0.102
Fig6G-EMO+RMO/CMO	Not normally distributed	Nonparametric comparisons with control using Steel-Dwass method	11/38	0.0235
Fig6G-EMO+RMO+FMO/CMO	Not normally distributed	Nonparametric comparisons with control using Steel-Dwass method	17/38	0.0001
Fig6H-CMO vs. all others	Not normally distributed	chi-square test of independence with the Bonferroni correction	38/64	2.6e-06
Fig6H-EMO vs. all others	Not normally distributed	chi-square test of independence with the Bonferroni correction	17/85	0.377241
Fig6H-FMO vs. all others	Not normally distributed	chi-square test of independence with the Bonferroni correction	9/93	0.840773
Fig6H-RMO vs. all others	Not normally distributed	chi-square test of independence with the Bonferroni correction	10/92	0.977352
Fig6H-EMO+RMO vs. all others	Not normally distributed	chi-square test of independence with the Bonferroni correction	11/91	0.250185
Fig6H-EMO+FMO+RMO vs. all others	Not normally distributed	chi-square test of independence with the Bonferroni correction	17/85	7.91e-05
Fig7B-5h/-1h	Not normally distributed	Nonparametric comparisons with control using Steel-Dwass method	27/21	0.0223	0.9363
Fig7B-24h/-1h	Not normally distributed	Nonparametric comparisons with control using Steel-Dwass method	31/21	0.0017
Fig7C-5h/-1h	Not normally distributed	Nonparametric comparisons with control using Steel-Dwass method	33/22	0.1452	0.302
Fig7C-24h/-1h	Not normally distributed	Nonparametric comparisons with control using Steel-Dwass method	33/22	0.1835
Fig 2 Sup1B-FUS	Not normally distributed	Wilcoxon / Kruskal-Wallis tests	4	0.0211	0.5022
Fig 2 Sup1B-RPS17	Not normally distributed	Wilcoxon / Kruskal-Wallis tests	4	0.0211	0.1799
Fig 2 Sup1C-eIF3A	Normally distributed	Two-tailed Student's t test	9	0.006	0.9345
Fig 2 Sup1C-FUS	Normally distributed	Two-tailed Student's t test	6	0.1777	0.2947
Fig 2 Sup1C-RPS17	Normally distributed	Two-tailed Student's t test	5	0.6886	0.0669
Fig 4 Sup1A	Normally distributed	Two-tailed paired Student’s t test	8	0.0076
Fig 4 Sup1B	Normally distributed	Two-tailed paired Student’s t test	6	0.0066
Fig 4 Sup1C	Normally distributed	Two-tailed paired Student’s t test	11	0.0109
Fig 4 Sup1D	Normally distributed	Two-tailed paired Student’s t test	17	0.4813
Fig 6 Sup1 panelC-neuronal cell body layer-EMO/CMO	Not normally distributed	Nonparametric comparisons for all pairs using Steel-Dwass method	7/14	0.0017	1
Fig 6 Sup1 panel C-neuronal cell body layer-ERMO/CMO	Not normally distributed	Nonparametric comparisons for all pairs using Steel-Dwass method	19/14	0.1035
Fig 6 Sup1 panel C-neuronal cell body layer-RMO/CMO	Not normally distributed	Nonparametric comparisons for all pairs using Steel-Dwass method	12/14	0.8785
Fig 6 Sup1 panel C-neuronal cell body layer-RMO/ERMO	Not normally distributed	Nonparametric comparisons for all pairs using Steel-Dwass method	12/19	0.1851
Fig 6 Sup1 panel C-neuronal cell body layer-RMO/EMO	Not normally distributed	Nonparametric comparisons for all pairs using Steel-Dwass method	12/7	0.0047
Fig 6 Sup1 panel C-neuronal cell body layer-ERMO/EMO	Not normally distributed	Nonparametric comparisons for all pairs using Steel-Dwass method	19/7	0.0019
Fig 6 Sup1 panel C-neuropil-ERMO/CMO	Not normally distributed	Nonparametric comparisons for all pairs using Steel-Dwass method	19/14	0.0337	0.984
Fig 6 Sup1 panel C-neuropil-EMO/CMO	Not normally distributed	Nonparametric comparisons for all pairs using Steel-Dwass method	7/14	0.0265
Fig 6 Sup1 panel C-neuropil-RMO/CMO	Not normally distributed	Nonparametric comparisons for all pairs using Steel-Dwass method	12/14	0.2378
Fig 6 Sup1 panel C-neuropil-RMO/ERMO	Not normally distributed	Nonparametric comparisons for all pairs using Steel-Dwass method	12/19	0.6801
Fig 6 Sup1 panel C-neuropil-ERMO/EMO	Not normally distributed	Nonparametric comparisons for all pairs using Steel-Dwass method	19/7	0.4012
Fig 6 Sup1 panel C-neuropil-RMO/EMO	Not normally distributed	Nonparametric comparisons for all pairs using Steel-Dwass method	12/7	0.1932
